# Supplementary material for: Lewis base-catalyzed trifluoromethylsulfinylation of alcohols and phenols: modular synthesis of trifluoromethanesulfinate esters
Source: Royal Society of Chemistry journal article supplement (doi:10.1039/d3qo00500c), 2023-01-01

# Supporting Information

## Lewis Base-catalyzed Trifluoromethylsulfonylation of Alcohols and Phenols: Modular Synthesis of Trifluoromethanesulfinate Esters

Wen Liu<sup>a#</sup>, Shuya Xing<sup>a#</sup>, Shao-Fei Ni<sup>b#</sup>, Cheng Ma<sup>b</sup>, Qiujin Fan, Zhiyong Ye, Yanchuang Zhao, Ting Ouyang, Ying Bai<sup>a\*</sup> and Xinxin Shao<sup>a</sup>

<sup>a</sup>College of Material, Chemistry and Chemical Engineering, Key Laboratory of Organosilicon Chemistry and Material Technology of Ministry of Education. Hangzhou Normal University. Hangzhou 311121, Zhejiang, China.

<sup>b</sup>Department of Chemistry and Key Laboratory for Preparation and Application of Ordered Structural Materials of Guang-dong Province. Shantou University. Shantou 515063, Guangdong, China

## Table of Contents

|                                                                              |            |
|------------------------------------------------------------------------------|------------|
| <b>I. General information</b> .....                                          | <b>S2</b>  |
| <b>II. Synthesis of the starting materials</b> .....                         | <b>S3</b>  |
| <b>III. Optimization of the reaction conditions</b> .....                    | <b>S7</b>  |
| <b>IV. Substrate scope</b> .....                                             | <b>S8</b>  |
| <b>IV. Synthesis of trifluoromethanesulfinamide 11</b> .....                 | <b>S32</b> |
| <b>V. Scale-up reaction and sustainable utilization of phthalimide</b> ..... | <b>S33</b> |
| <b>VI. Mechanistic studies</b> .....                                         | <b>S35</b> |
| <b>VII. References</b> .....                                                 | <b>S43</b> |
| <b>VIII. DFT Calculation</b> .....                                           | <b>S45</b> |
| <b>IX. NMR spectrum of the products</b> .....                                | <b>S57</b> |

## I. General information

**General procedures.** General Information Unless specifically stated, all reagents were commercially obtained and where appropriate, purified prior to use. For example, dichloromethane (DCM) was freshly distilled from CaH<sub>2</sub>; toluene, ether (Et<sub>2</sub>O) was dried and distilled from metal sodium and benzophenone. Other commercially available reagents and solvents were used directly without purification. Reactions were monitored by thin layer chromatography (TLC) using silica gel plates. Flash column chromatography was performed over silica (200 - 300 mesh). <sup>1</sup>H, <sup>13</sup>C, <sup>19</sup>F NMR spectra were recorded on a Bruker 400 MHz or 500 MHz spectrometer in CDCl<sub>3</sub> or THF-*d*<sub>8</sub> or CD<sub>3</sub>COCD<sub>3</sub> or CD<sub>3</sub>OD or C<sub>6</sub>D<sub>6</sub>. Multiplicities were given as: s (singlet); d (doublet); dd (doublets of doublet); t (triplet); q (quartet); td (triplet of doublets); tt (triplet of triplets) ddd (doublet of doublet of doublets) or m (multiplets). High resolution mass spectra (HRMS) of the products were obtained on a Bruker Daltonics micro TOF-spectrometer and on a Agilent Technologies micro Q-TOF-spectrometer.

**Reagents.** The following chemicals were used as received: 1-Adamantanol (Energy-Chemical), Benzaldehyde (Energy-Chemical), 1-Boc-3-azetidinone (Energy-Chemical), 3-Bromobenzaldehyde (Macklin), 1,4-Benzenedimethanol (Energy-Chemical), 3-Bromobenzyl alcohol (leyan.com), 4-Bromobenzyl Alcohol (Energy-Chemical), 4-Bromobenzaldehyde (leyan.com), 6-Bromo-1-hexanol (Energy-Chemical), 4-Bromo-1-indanone (Energy-Chemical), 5-Bromo-1-indanone (leyan.com), 4-Chlorobenzaldehyde (leyan.com), 4-Chlorobenzyl alcohol (Energy-Chemical), 6-Chloro-1-hexanol (Energy-Chemical), 5-Chloro-1-indanone (leyan.com), 6-Chloro-1-hexanol (Energy-Chemical), Cholesterol (Energy-Chemical), β-Citronellol (Adamas), 4-Cyanobenzaldehyde (leyan.com), Dehydroepiandrosterone (Macklin), Diacetone-beta-D-fructose (Adamas), Diethyl (ethoxyacetyl)phosphonate (Adamas), 3,5-Difluorobenzaldehyde (leyan.com), Diisobutylaluminiumhydrid (Energy-Chemical), 3,3-Dimethyl-1-indanone (leyan.com), 1,4-Dioxaspiro[4.5]decan-8-one (Energy-Chemical), 1,4-Dioxaspiro[4.5]decan-8-ol (Energy-Chemical), 1-(Diphenylmethyl)-3-hydroxyazetidine (Energy-Chemical), DL-menthol (Energy-Chemical), 2-Ethyl-1-indanone (leyan.com), Ethylmagnesium bromide (Energy-Chemical), Estrone (Adamas), 4-Fluorobenzaldehyde (leyan.com), 4-Fluorobenzyl alcohol (leyan.com), 5-Fluoro-1-indanone (leyan.com), Hept-6-yn-1-ol

(Energy-Chemical), 5-(2-Hydroxyethyl)-4-methylthiazole (leyan.com), Hydrogen peroxide (aladdin), 4-Hydroxymethylbiphenyl (Energy-Chemical), 1-Indanone (Energy-Chemical), 2-Indanone (leyan.com), 2-Indanol (Energy-Chemical), 4-Iodobenzyl Alcohol (leyan.com), 4-Iodobenzaldehyde (Adamas), Iodomethane (Energy-Chemical), Isopropenylmagnesium bromide (Energy-Chemical), Methyl 4-Formylbenzoate (Energy-Chemical), 2-Methylindan-1-one (Energy-Chemical), Methyl 4-(hydroxymethyl)benzoate (leyan.com), 5-Methyl-1-indanone (Energy-Chemical), 4-(Methylthio)benzaldehyde (leyan.com), 2-Naphthaldehyde (Adamas), 2-Nitrobenzaldehyde (Energy-Chemical), 3-Nitrobenzaldehyde (Energy-Chemical), 4-Nitrobenzaldehyde (Adamas), 4-Nitrobenzyl alcohol (Energy-Chemical), *N*-BOC-4-Hydroxypiperidine (Energy-Chemical), *N,N*-Diethylethanamin (Energy-Chemical), Palladium (Energy-Chemical), Potassium phthalimide (Energy-Chemical), *p*-phthalaldehyde (leyan.com), 3-Pyridinecarboxaldehyde (Energy-Chemical), Quinoline-3-carboxaldehyde (leyan.com), Ruthenium(III) chloride hydrate (Energy-Chemical), Sodium hydride (Energy-Chemical), Sodium periodate (Energy-Chemical), Sodium tungstate (Adamas), Stigmasterol (Energy-Chemical), *tert*-Butyl 2-oxo-7-azaspiro[3.5]nonane-7-carboxylate (Energy-Chemical), *tert*-Butyl *N*-(4-hydroxycyclohexyl)carbamate (leyan.com), 4-(4,4,5,5-Tetramethyl-1,3,2-dioxaborolan-2-yl)benzaldehyde (leyan.com), 3-Thiophenecarboxaldehyde (Energy-Chemical), 2-Tolualdehyde (Energy-Chemical), Trifluoromethanesulfinyl chloride (Energy-Chemical), 3-(Trifluoromethyl)benzaldehyde (Adamas), Tryptophol (leyan.com), 4-(Trifluoromethyl)benzaldehyde (Energy-Chemical), 4-(Trifluoromethyl)benzyl alcohol (Energy-Chemical), (Triphenylphosphoranylidene)acetaldehyde (leyan.com), Tryptophol (Energy-Chemical).

## II. Synthesis of the starting materials

### 1. Synthesis of 2-((Trifluoromethyl)sulfinyl)isoindoline-1,3-dione **1**

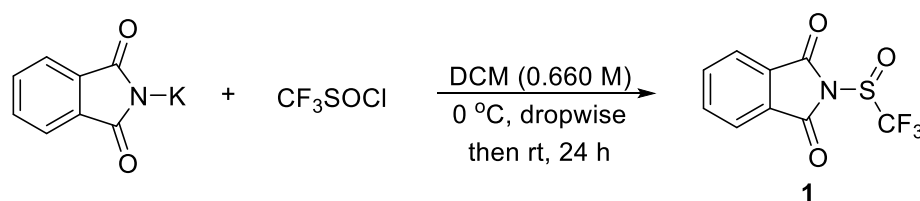

A 120 °C oven-dried 200-mL glass, equipped with a stir bar, was charged with potassium

phthalimide (6.11 g, 33.0 mmol, 1.00 equiv), The mixture was evacuated and backfilled with nitrogen for three times. Then dry DCM (45.0 mL) was added under N<sub>2</sub> atmosphere. The mixture was cooled to 0 °C. A solution of trifluoromethanesulfinyl chloride (5.00 g, 33.0 mmol, 1.00 equiv) in DCM (5.00 mL) was added dropwise under N<sub>2</sub> atmosphere. Then the mixture was slowly warmed up to room temperature and stirred at room temperature for 24 h. The reaction mixture was filtered through a short pad of Celite and concentrated in vacuo. By repeated recrystallization from toluene at –20 °C. The product was white solid (4.46 g, 16.9 mmol, 51.4% yield). Spectra were consistent with literature data<sup>1</sup>. **In particular, the purity of the substance will have an important effect on the efficiency of the subsequent reaction.**

## 2. Synthesis of alcohol 2n

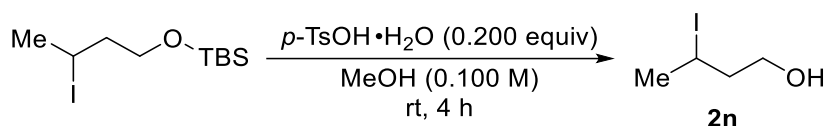

A 120 °C oven-dried 100-mL round-bottom flask, equipped with a stir bar, was charged with 2-iodo-4-(*tert*-butyldimethylsilyloxy)butane (1.50 g, 4.77 mmol, 1.00 equiv) and MeOH (48.0 mL) were added under nitrogen. Then *p*-toluenesulfonic acid monohydrate (182 mg, 0.950 mmol, 0.2 equiv) was added to the mixture and the mixture was allowed to stir at room temperature for 4 h. After the completion of reaction, a saturated aqueous solution of NaHCO<sub>3</sub> was added and the mixture was extracted with Et<sub>2</sub>O (50.0 mL × 3). The combined organic layers were washed with brine (10.0 mL), dried over Na<sub>2</sub>SO<sub>4</sub> and filtrated. The solvent was removed by rotary evaporation and the residue was purified by flash silica gel chromatography to provide the desired products as a colorless liquid (712 mg, 3.56 mmol, 74.6% yield). Spectra were consistent with literature data<sup>2</sup>.

## 3. General Method A: Synthesis of alcohol 2r, 2v

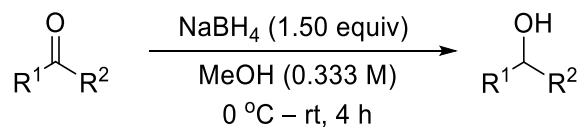

A 120 °C oven-dried 100-mL glass, equipped with a stir bar, was charged with ketone (5.00 mmol, 1.00 equiv). The mixture was evacuated and backfilled with nitrogen for three

times. Then dry MeOH (15.0 mL) was added under N<sub>2</sub> atmosphere. The mixture was cooled to 0 °C. NaBH<sub>4</sub> (283.7 mg, 7.50 mmol, 1.50 equiv) was added under N<sub>2</sub> atmosphere. The mixture was warmed up to room temperature and stirred at room temperature for 1 h. After the completion of the reaction, the MeOH was removed by rotary evaporation, and H<sub>2</sub>O (30.0 mL) was added, the aqueous solution was washed with EtOAc (20.0 mL × 3). The combined organic layers were washed with brine (30.0 mL × 3), dried over Na<sub>2</sub>SO<sub>4</sub> and filtered. The solvent was removed by rotary evaporation and the residue was purified by flash silica gel chromatography<sup>3</sup>. Compound **2r**: (prepared on 10.0 mmol scale, a colorless liquid, 0.961 g, 7.16 mmol, 71.6% yield), spectra were consistent with literature data<sup>4</sup>. Compound **2v**: a colorless liquid (0.897 g, 4.62 mmol, 92.3% yield), spectra were consistent with literature data<sup>5</sup>.

#### 4. General Method B: Synthesis of alcohol **2y**

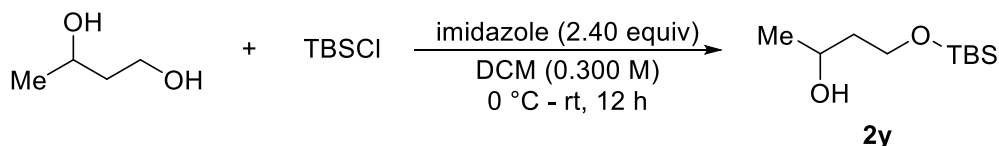

A 120 °C oven-dried 100-mL glass, equipped with a stir bar, and backfilled with nitrogen for three times. Then dry DCM (40.0 mL), imidazole (2.70 g, 39.6 mmol, 2.40 equiv) and butane-1,3-diol (1.48 g, 1.50 mL, 16.5 mmol, 1.00 equiv) were added under N<sub>2</sub> atmosphere. Then TBSCl (2.98 g, 19.8 mmol, 1.20 equiv) in dry DCM (15.0 mL) was added to the mixture under N<sub>2</sub> atmosphere at 0 °C. Then mixture was allowed to stirred at room temperature for 12 h. After the completion of the reaction, brine (30.0 mL × 3) was added to the mixture, and the aqueous phase was extracted with EtOAc (30.0 mL × 3). The combined organic phases was dried over Na<sub>2</sub>SO<sub>4</sub> and filtered. The solvent was removed by rotary evaporation and the residue was purified by flash silica gel chromatography. The product was isolated as a colorless liquid (2.94 g, 14.4 mmol, 87.2% yield). Spectra were consistent with literature data<sup>2</sup>.

## 5. Synthesis of 1-(Methoxymethyl)-4-nitrobenzene **2a'**

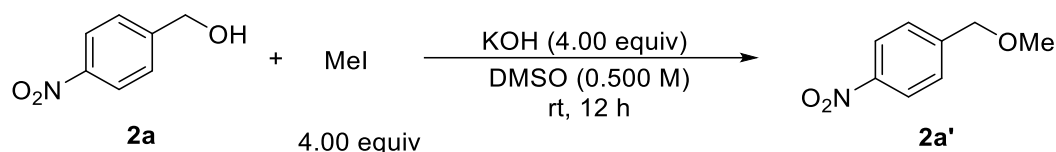

A 120 °C oven-dried 100-mL glass, equipped with a stir bar, was charged with KOH (1.12 g, 20.0 mmol, 4.00 equiv). The mixture was evacuated and backfilled with nitrogen for three times. Then DMSO (10.0 mL) was added under N<sub>2</sub> atmosphere. Then a solution of **2a** (0.766 g, 5.00 mmol, 1.00 equiv) and MeI (2.84 g, 20.0 mmol, 4.00 equiv) in DMSO (2.50 mL) was added dropwise under N<sub>2</sub> atmosphere. The mixture was stirred at room temperature for 12 h. The reaction mixture was extracted with EtOAc (20.0 mL × 3). The combined organic layers were washed with 10% NaHSO<sub>3</sub> (30.0 mL) and water (20.0 mL), dried over Na<sub>2</sub>SO<sub>4</sub> and filtered. The solvent was removed by rotary evaporation and the residue was purified by flash silica gel chromatography. The product was yellow oil (0.558 g, 3.34 mmol, 66.7% yield). Spectra were consistent with literature data<sup>6</sup>.

## 6. Synthesis of 1-Methoxy-2,3-dihydro-1*H*-indene **6a'**

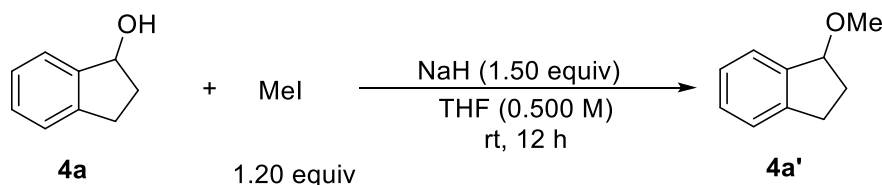

A 120 °C oven-dried 100-mL glass, equipped with a stir bar, was charged with NaH (60% disp. in mineral, 0.180 g, 4.50 mmol, 1.50 equiv) and **6a** (0.403 g, 3.00 mmol, 1.00 equiv). The mixture was evacuated and backfilled with nitrogen for three times. Then MeI (0.511 g, 3.60 mmol, 1.20 equiv) was added dropwise under N<sub>2</sub> atmosphere. The mixture was stirred at room temperature for 12 h. The reaction mixture was extracted with EtOAc (20.0 mL × 3). The combined organic layers were washed with brine (20.0 mL), dried over Na<sub>2</sub>SO<sub>4</sub> and filtered. The solvent was removed by rotary evaporation and the residue was purified by flash silica gel chromatography. The product was isolated as a colorless oil (0.258 g, 1.74 mmol, 58.0% yield). Spectra were consistent with literature data<sup>7</sup>.

### III. Optimization of the reaction conditions

#### 1. Optimization of reaction between 2a with reagent 1

**Table S1. Evaluation of different solvents**

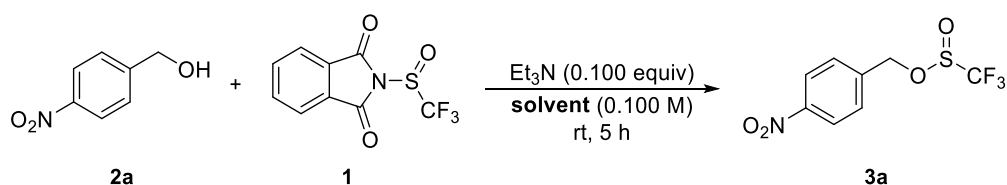

| Entry | solvent     | Yield of 3a (%) <sup>a</sup> |
|-------|-------------|------------------------------|
| 1     | 2-MeTHF     | > 99                         |
| 2     | DCM         | > 99                         |
| 3     | EtOAc       | > 99                         |
| 4     | Ether       | > 99                         |
| 5     | DMF         | > 99                         |
| 6     | MeOH        | trace                        |
| 7     | MeCN        | > 99                         |
| 8     | NMP         | 53                           |
| 9     | DMSO        | 17                           |
| 10    | 1,4-Dioxane | 86                           |

Reaction conditions: 2a (0.100 mmol), 1 (0.120 mmol),  $\text{Et}_3\text{N}$  (0.100 equiv), solvent (1.00 mL) at rt for 5 h.

<sup>a</sup>Yield was determined by  $^{19}\text{F}$  NMR spectroscopy in the presence of  $\text{PhCF}_3$  as an internal standard.

**Table S2. Evaluation of different bases**

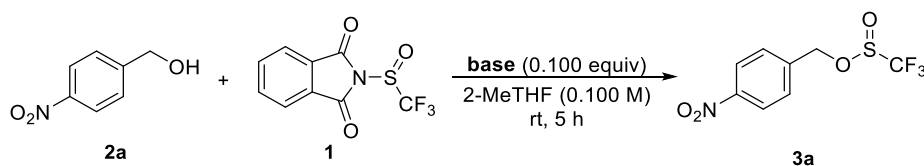

| Entry | base                     | Yield of 3a (%) <sup>a</sup> |
|-------|--------------------------|------------------------------|
| 1     | $\text{Et}_3\text{N}$    | > 99                         |
| 2     | none                     | no reaction                  |
| 3     | $\text{Cs}_2\text{CO}_3$ | 39                           |
| 4     | $\text{K}_2\text{CO}_3$  | 38                           |
| 5     | $\text{CsF}$             | 17                           |
| 6     | DMAP                     | > 99                         |
| 7     | $\text{K}_3\text{PO}_4$  | trace                        |
| 8     | $\text{NaOAc}$           | trace                        |
| 9     | DBU                      | > 99                         |
| 10    | $^t\text{BuOK}$          | < 10                         |
| 11    | pyridine                 | 75                           |

Reaction conditions: 2a (0.100 mmol), 1 (0.120 mmol), base (0.0100 mmol), 2-MeTHF (1.00 mL) at rt for 5 h.

<sup>a</sup>Yield was determined by  $^{19}\text{F}$  NMR spectroscopy in the presence of  $\text{PhCF}_3$  as an internal standard.

**Table S3. Evaluation of different temperature and time**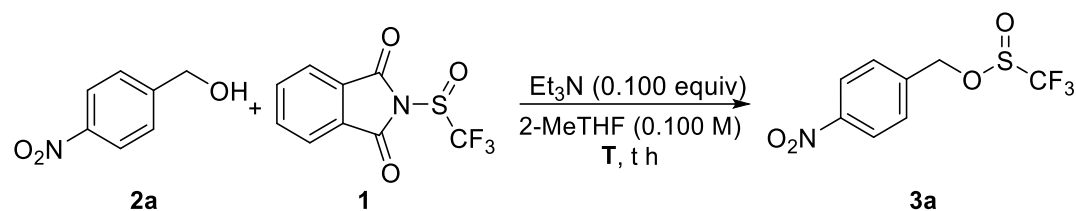

| Entry | T (°C) | t (h) | Yield of <b>3a</b> (%) <sup>a</sup> |
|-------|--------|-------|-------------------------------------|
| 1     | 60     | 5     | 76                                  |
| 2     | rt     | 5     | > 99                                |
| 3     | -40    | 5     | 98                                  |
| 4     | rt     | 1     | 42                                  |
| 5     | rt     | 3     | 94                                  |

Reaction conditions: **2a** (0.100 mmol), **1** (0.120 mmol),  $\text{Et}_3\text{N}$  (0.0100 mmol), 2-MeTHF (1.00 mL) at T °C for t h. <sup>a</sup>Yield was determined by  $^{19}\text{F}$  NMR spectroscopy in the presence of  $\text{PhCF}_3$  as an internal standard.

## IV. Substrate scope

### 1. General Method C:

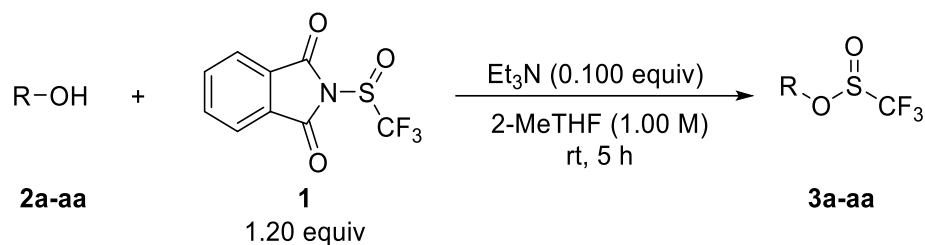

A 120 °C oven-dried 25-mL glass schlenk, equipped with a stir bar, was charged with 2-((trifluoromethyl)sulfonyl)isoindoline-1,3-dione (0.360 mmol, 1.20 equiv, 94.8 mg). The mixture was evacuated and backfilled with nitrogen for three times. Then dry 2-MeTHF (3.00 mL, 0.100 M), alcohol or benzyl alcohol (0.300 mmol, 1.00 equiv) and  $\text{Et}_3\text{N}$  (0.0300 mmol, 0.100 equiv, 3.00 mg) were added under  $\text{N}_2$  atmosphere. The mixture was allowed to stir for 5 h at room temperature. The solvent was removed by rotary evaporation and the residue was purified by flash silica gel chromatography.



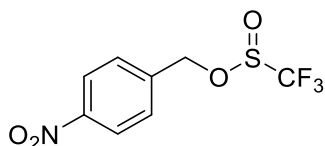

**4-Nitrobenzyl trifluoromethanesulfinate 3a:** Prepared according to **General Method C** (Eluent: 100:1 to 5:1 petroleum ether:ethyl acetate) and the title compound was isolated as a colorless oil (60.1 mg, 0.223 mmol, 74.3% yield). **<sup>1</sup>H NMR** (400 MHz, CDCl<sub>3</sub>)  $\delta$  8.26 (d,  $J = 8.7$  Hz, 2H), 7.57 (d,  $J = 8.7$  Hz, 2H), 5.48 (1H, d,  $J = 12.5$  Hz), 5.18 (1H, d,  $J = 12.4$  Hz); **<sup>19</sup>F NMR** (471 MHz, CDCl<sub>3</sub>)  $\delta$  -77.8; **<sup>13</sup>C NMR** (101 MHz, CDCl<sub>3</sub>)  $\delta$  148.4, 140.9, 129.1, 124.2, 123.0 (q,  $J_{C-F} = 340.8$  Hz), 67.4. Spectra were consistent with literature data<sup>8</sup>.

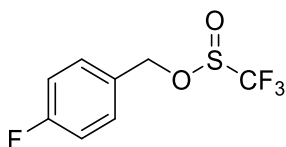

**4-Fluorobenzyl trifluoromethanesulfinate 3b:** Prepared according to **General Method C** (Eluent: 100:1 to 20:1 petroleum ether:ethyl acetate) and the title compound was isolated as a colorless oil (71.9 mg, 0.297 mmol, 99.0% yield). **IR** (thin film) 1605 (w), 1513 (m), 1185 (s), 1125 (s), 888 (m), 835 (m), 748 (m) cm<sup>-1</sup>; **<sup>1</sup>H NMR** (400 MHz, CDCl<sub>3</sub>)  $\delta$  7.38 (2H, dd,  $J = 3.3, 5.3$  Hz), 7.10 (2H, dd,  $J = 8.6, 8.6$  Hz), 5.35 (1H, d,  $J = 11.4$  Hz), 5.06 (1H, d,  $J = 11.4$  Hz); **<sup>19</sup>F NMR** (471 MHz, CDCl<sub>3</sub>)  $\delta$  -78.0 (3F, s), -111.3 – -111.4 (1F, m); **<sup>13</sup>C NMR** (101 MHz, CDCl<sub>3</sub>)  $\delta$  163.5 (d,  $J_{C-F} = 249.9$  Hz), 131.2 (d,  $J_{C-F} = 8.7$  Hz), 129.7 (d,  $J_{C-F} = 3.1$  Hz), 123.1 (q,  $J_{C-F} = 340.7$  Hz), 116.2 (d,  $J_{C-F} = 22.0$  Hz), 69.0; **HRMS** (ESI)  $m/z$ : [M+H]<sup>+</sup> Calcd for C<sub>8</sub>H<sub>7</sub>F<sub>4</sub>O<sub>2</sub>S 243.0103; Found 243.0117.

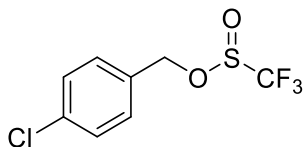

**4-Chlorobenzyl trifluoromethanesulfinate 3c:** Prepared according to **General Method C** (Eluent: 100:1 to 20:1 petroleum ether:ethyl acetate) and the title compound was isolated as a colorless oil (54.2 mg, 0.210 mmol, 70.0% yield). **<sup>1</sup>H NMR** (400 MHz, CDCl<sub>3</sub>)  $\delta$  7.38 (2H, d,  $J = 8.4$  Hz), 7.32 (2H, d,  $J = 8.4$  Hz), 5.34 (1H, d,  $J = 11.6$  Hz), 5.05 (1H, d,  $J = 11.6$  Hz); **<sup>19</sup>F NMR** (471 MHz, CDCl<sub>3</sub>)  $\delta$  -78.0; **<sup>13</sup>C NMR** (101 MHz, CDCl<sub>3</sub>)  $\delta$  135.6,

132.3, 130.3, 129.3, 123.1 (q,  $J_{C-F} = 340.3$  Hz), 68.8. Spectra were consistent with literature data<sup>8</sup>.

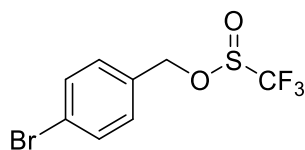

**4-Bromobenzyl trifluoromethanesulfinate 3d:** Prepared according to **General Method C** (Eluent: 100:1 to 20:1 petroleum ether:ethyl acetate) and the title compound was isolated as a colorless oil (87.3 mg, 0.288 mmol, 96.0% yield). **<sup>1</sup>H NMR** (400 MHz, CDCl<sub>3</sub>)  $\delta$  7.45 (2H, d,  $J = 8.4$  Hz), 7.17 (2H, d,  $J = 8.4$  Hz), 5.23 (1H, d,  $J = 11.6$  Hz), 4.95 (1H, d,  $J = 11.6$  Hz); **<sup>19</sup>F NMR** (471 MHz, CDCl<sub>3</sub>)  $\delta$  -78.0; **<sup>13</sup>C NMR** (101 MHz, CDCl<sub>3</sub>)  $\delta$  132.7, 132.2, 130.5, 123.8, 123.1 (q,  $J_{C-F} = 340.2$  Hz), 68.8. Spectra were consistent with literature data<sup>8</sup>.

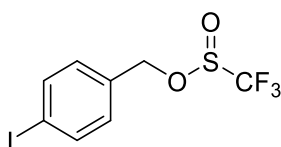

**4-Iodobenzyl trifluoromethanesulfinate 3e:** Prepared according to **General Method C** (Eluent: 100:1 to 20:1 petroleum ether:ethyl acetate) and the title compound was isolated as a colorless oil (101.7 mg, 0.290 mmol, 96.7% yield). **IR** (thin film) 1486 (w), 1182 (s), 1124 (s), 1059 (w), 1009 (w), 890 (m), 843 (m), 797 (m) cm<sup>-1</sup>; **<sup>1</sup>H NMR** (400 MHz, CDCl<sub>3</sub>)  $\delta$  7.74 (2H, d,  $J = 8.4$  Hz), 7.12 (2H, d,  $J = 8.4$  Hz), 5.31 (1H, d,  $J = 11.6$  Hz), 5.02 (1H, d,  $J = 11.6$  Hz); **<sup>19</sup>F NMR** (471 MHz, CDCl<sub>3</sub>)  $\delta$  -78.0; **<sup>13</sup>C NMR** (101 MHz, CDCl<sub>3</sub>)  $\delta$  138.2, 133.3, 130.6, 123.0 (q,  $J_{C-F} = 340.3$  Hz), 95.6, 68.9; **HRMS** (ESI)  $m/z$ : [M+Na]<sup>+</sup> Calcd for C<sub>8</sub>H<sub>6</sub>F<sub>3</sub>INaO<sub>2</sub>S 372.8978; Found 372.8979.

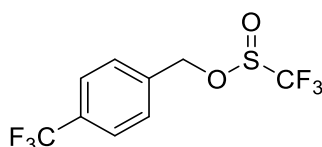

**4-(Trifluoromethyl)benzyl trifluoromethanesulfinate 3f:** Prepared according to **General Method C** (Eluent: 100:1 to 20:1 petroleum ether:ethyl acetate) and the title compound was isolated as a colorless oil (86.8 mg, 0.297 mmol, 99.0% yield). **IR** (thin film) 1324 (s), 1167 (s), 1121 (s), 1066 (s), 904 (m), 822 (m), 779 (m) cm<sup>-1</sup>; **<sup>1</sup>H NMR** (400 MHz, CDCl<sub>3</sub>)  $\delta$  7.67 (2H, d,  $J = 8.1$  Hz), 7.51 (2H, d,  $J = 8.1$  Hz), 5.43 (1H, d,  $J =$

12.0 Hz), 5.14 (1H, d,  $J = 12.0$  Hz);  $^{19}\text{F}$  NMR (471 MHz,  $\text{CDCl}_3$ )  $\delta$  -62.9 (3F, s), -78.0 (3F, s);  $^{13}\text{C}$  NMR (125 MHz,  $\text{CDCl}_3$ )  $\delta$  137.8, 131.7 (q,  $J_{\text{C-F}} = 32.5$  Hz), 128.9, 126.1 (q,  $J_{\text{C-F}} = 4.1$  Hz), 123.9 (q,  $J_{\text{C-F}} = 270.3$  Hz), 123.1 (q,  $J_{\text{C-F}} = 337.6$  Hz), 68.2; HRMS (ESI)  $m/z$ :  $[\text{M}+\text{H}]^+$  Calcd for  $\text{C}_9\text{H}_7\text{F}_6\text{O}_2\text{S}$  293.0065; Found 293.0061.

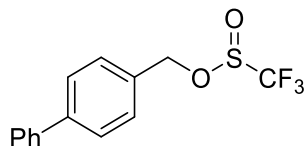

**[1,1'-Biphenyl]-4-ylmethyl trifluoromethanesulfinate 3g:** Prepared according to **General Method C** (Eluent: 100:1 to 20:1 petroleum ether:ethyl acetate) and the title compound was isolated as a colorless oil (66.1 mg, 0.220 mmol, 73.3% yield). IR (thin film) 1488 (w), 1185 (s), 1126 (s), 854 (s), 754 (m), 695 (s)  $\text{cm}^{-1}$ ;  $^1\text{H}$  NMR (400 MHz,  $\text{CDCl}_3$ )  $\delta$  7.67 – 7.61 (4H, m), 7.50 – 7.47 (4H, m), 7.42 – 7.38 (1H, m), 5.44 (1H, d,  $J = 11.4$  Hz), 5.16 (1H, d,  $J = 11.4$  Hz);  $^{19}\text{F}$  NMR (471 MHz,  $\text{CDCl}_3$ )  $\delta$  -78.0;  $^{13}\text{C}$  NMR (101 MHz,  $\text{CDCl}_3$ )  $\delta$  142.6, 140.3, 132.6, 129.5, 129.0, 127.9, 127.8, 127.3, 123.2 (q,  $J_{\text{C-F}} = 340.3$  Hz), 69.7; HRMS (ESI)  $m/z$ :  $[\text{M}+\text{Na}]^+$  Calcd for  $\text{C}_{14}\text{H}_{11}\text{F}_3\text{NaO}_2\text{S}$  323.0324; Found 323.0332.

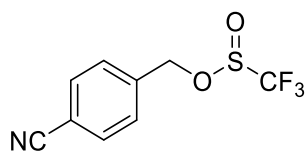

**4-Cyanobenzyl trifluoromethanesulfinate 3h:** Prepared according to **General Method C** (Eluent: 100:1 to 5:1 petroleum ether:ethyl acetate) and the title compound was isolated as a colorless oil (74.1 mg, 0.297 mmol, 99.1% yield). IR (thin film) 1185 (s), 1125 (s), 928 (m), 857 (m), 820 (m), 776 (m)  $\text{cm}^{-1}$ ;  $^1\text{H}$  NMR (400 MHz,  $\text{CDCl}_3$ )  $\delta$  7.71 (2H, d,  $J = 8.1$  Hz), 7.50 (2H, d,  $J = 8.0$  Hz), 5.43 (1H, d,  $J = 12.3$  Hz), 5.12 (1H, d,  $J = 12.3$  Hz);  $^{19}\text{F}$  NMR (471 MHz,  $\text{CDCl}_3$ )  $\delta$  -77.8;  $^{13}\text{C}$  NMR (101 MHz,  $\text{CDCl}_3$ )  $\delta$  138.9, 132.8, 128.9, 123.0 (q,  $J_{\text{C-F}} = 340.3$  Hz), 118.3, 113.3, 67.7; HRMS (ESI)  $m/z$ :  $[\text{M}+\text{H}]^+$  Calcd for  $\text{C}_9\text{H}_7\text{F}_3\text{NO}_2\text{S}$  250.0144; Found 250.0146.

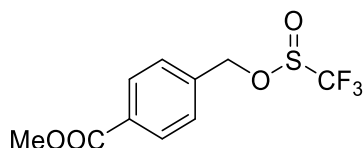

**Methyl 4-(((trifluoromethyl)sulfinyl)oxy)methyl)benzoate 3i:** Prepared according to **General Method C** (Eluent: 100:1 to 10:1 petroleum ether:ethyl acetate) and the title compound was isolated as a colorless oil (79.6 mg, 0.282 mmol, 94.0% yield). **IR** 1720 (s), 1437 (w), 1280 (s), 1180 (s), 1126 (s), 923 (m), 865 (m), 809 (m), 749 (s), 695 (m)  $\text{cm}^{-1}$ ;  **$^1\text{H NMR}$**  (400 MHz,  $\text{CDCl}_3$ )  $\delta$  8.06 (2H, d,  $J = 8.1$  Hz), 7.43 (2H, d,  $J = 8.1$  Hz), 5.40 (1H, d,  $J = 12.0$  Hz), 5.12 (1H, d,  $J = 12.0$  Hz), 3.91 (3H, s);  **$^{19}\text{F NMR}$**  (471 MHz,  $\text{CDCl}_3$ )  $\delta$  -78.0;  **$^{13}\text{C NMR}$**  (101 MHz,  $\text{CDCl}_3$ )  $\delta$  166.5, 138.6, 131.1, 130.2, 128.4, 123.0 (q,  $J_{\text{C-F}} = 340.8$  Hz), 68.6, 52.4; **MS** (FI):  $m/z$  (%) 69, 118, 149, 213, 282. **HRMS** (FI) Calcd for  $\text{C}_{10}\text{H}_9\text{F}_3\text{O}_4\text{S}$  282.0163; Found 282.0168.

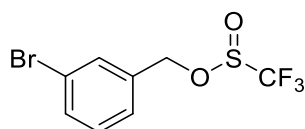

**3-Bromobenzyl trifluoromethanesulfinate 3j:** Prepared according to **General Method C** (Eluent: 100:1 to 20:1 petroleum ether:ethyl acetate) and the title compound was isolated as a colorless oil (65.0 mg, 0.214 mmol, 71.3% yield). **IR** (thin film) 1185 (s), 1125 (s), 886 (m), 789 (m), 685 (m)  $\text{cm}^{-1}$ ;  **$^1\text{H NMR}$**  (400 MHz,  $\text{CDCl}_3$ )  $\delta$  7.47 – 7.45 (2H, m), 7.26 – 7.20 (2H, m), 5.27 (1H, d,  $J = 11.7$  Hz), 4.97 (1H, d,  $J = 11.6$  Hz);  **$^{19}\text{F NMR}$**  (471 MHz,  $\text{CDCl}_3$ )  $\delta$  -77.9;  **$^{13}\text{C NMR}$**  (101 MHz,  $\text{CDCl}_3$ )  $\delta$  136.0, 132.6, 131.7, 130.6, 127.3, 123.1 (q,  $J_{\text{C-F}} = 342.7$  Hz), 123.0, 68.4; **MS** (FI):  $m/z$  (%) 69, 141, 169, 205, 233, 304. **HRMS** (FI) Calcd for  $\text{C}_8\text{H}_6\text{F}_3\text{O}_2\text{BrS}$  301.9216; Found 301.9218.

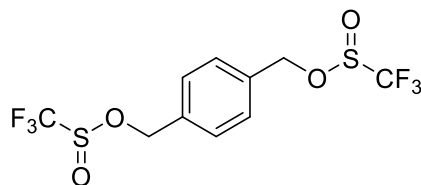

**1,4-Phenylenebis(methylene) bis(trifluoromethanesulfinate) 3k:** Prepared according to **General Method C** (reagent **1** 2.40 equiv,  $\text{Et}_3\text{N}$  0.200 equiv) (Eluent: 50:1 to 10:1 petroleum ether:ethyl acetate) and the title compound was isolated as a colorless oil (107.0 mg, 0.289 mmol, 96.3% yield). **IR** (thin film) 1179 (s), 1123 (s), 893 (m),

751 (m)  $\text{cm}^{-1}$ ;  $^1\text{H NMR}$  (400 MHz,  $\text{CDCl}_3$ )  $\delta$  7.43 (4H, s), 5.39 (2H, d,  $J = 11.6$  Hz), 5.10 (2H, d,  $J = 11.6$  Hz);  $^{19}\text{F NMR}$  (471 MHz,  $\text{CDCl}_3$ )  $\delta$  -78.1;  $^{13}\text{C NMR}$  (101 MHz,  $\text{CDCl}_3$ )  $\delta$  135.1, 129.3, 123.1 (q,  $J_{\text{C-F}} = 340.7$  Hz), 69.0; **HRMS** (ESI)  $m/z$ :  $[\text{M}+\text{Na}]^+$  Calcd for  $\text{C}_{10}\text{H}_8\text{F}_6\text{NaO}_4\text{S}_2$  392.9660; Found 392.9665.

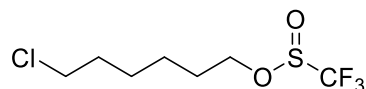

**6-Chlorohexyl trifluoromethanesulfinate 3l:** Prepared according to **General Method C** (Eluent: 200:1 to 50:1 petroleum ether:ethyl acetate) and the title compound was isolated as a colorless oil (60.6 mg, 0.240 mmol, 80.0% yield). **IR** (thin film) 1185 (s), 1127 (s), 894 (m), 724 (w)  $\text{cm}^{-1}$ ;  $^1\text{H NMR}$  (400 MHz,  $\text{CDCl}_3$ )  $\delta$  4.39 – 4.11 (2H, m), 3.53 (2H, t,  $J = 6.6$  Hz), 1.85 – 1.70 (4H, m), 1.52 – 1.39 (4H, m);  $^{19}\text{F NMR}$  (471 MHz,  $\text{CDCl}_3$ )  $\delta$  -78.6;  $^{13}\text{C NMR}$  (101 MHz,  $\text{CDCl}_3$ )  $\delta$  123.0 (q,  $J_{\text{C-F}} = 340.1$  Hz), 69.0, 44.9, 32.4, 29.7, 26.4, 24.8; **MS** (FI)  $[\text{M}+\text{H}]^+$ :  $m/z$  (%) 69, 83, 119, 183, 253. **HRMS** (FI)  $[\text{M}+\text{H}]^+$  Calcd for  $\text{C}_7\text{H}_{13}\text{F}_3\text{O}_2\text{ClS}$  253.0275; Found 253.0271.

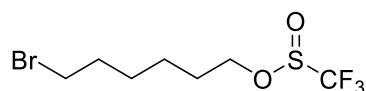

**6-Bromohexyl trifluoromethanesulfinate 3m:** Prepared according to **General Method C** (Eluent: 200:1 to 50:1 petroleum ether:ethyl acetate) and the title compound was isolated as a colorless oil (88.5 mg, 0.298 mmol, 99.3% yield). **IR** (thin film) 1185 (s), 1127 (s), 891 (m)  $\text{cm}^{-1}$ ;  $^1\text{H NMR}$  (400 MHz,  $\text{CDCl}_3$ )  $\delta$  4.39 – 4.10 (2H, m), 3.40 (2H, t,  $J = 6.7$  Hz), 1.86 (2H, p,  $J = 6.7$  Hz), 1.76 (2H, p,  $J = 6.4$  Hz), 1.52 – 1.38 (4H, m);  $^{19}\text{F NMR}$  (471 MHz,  $\text{CDCl}_3$ )  $\delta$  -78.6;  $^{13}\text{C NMR}$  (101 MHz,  $\text{CDCl}_3$ )  $\delta$  122.9 (q,  $J_{\text{C-F}} = 340.1$  Hz), 69.0, 33.6, 32.5, 29.6, 27.6, 24.7; **MS** (FI)  $[\text{M}+\text{H}]^+$ :  $m/z$  (%) 69, 165, 229, 297. **HRMS** (FI)  $[\text{M}+\text{H}]^+$  Calcd for  $\text{C}_7\text{H}_{13}\text{F}_3\text{O}_2\text{BrS}$  296.9769; Found 296.9766.

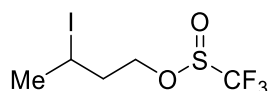

**3-Iodobutyl trifluoromethanesulfinate 3n:** Prepared according to **General Method C** (Eluent: 200:1 to 50:1 petroleum ether:ethyl acetate) and the title compound was isolated as a colorless oil (82.1 mg, 0.260 mmol, 86.6% yield, dr = 1:1). **IR** (thin film) 1186 (s), 1125 (s), 925 (m), 868 (m), 751 (w)  $\text{cm}^{-1}$ ; **MS** (FI):  $m/z$  (%) 189, 247, 316. **HRMS** (FI)

Calcd for C<sub>5</sub>H<sub>8</sub>F<sub>3</sub>O<sub>2</sub>IS 315.9239; Found 315.9236.

**Isomer 1:** <sup>1</sup>H NMR (400 MHz, CDCl<sub>3</sub>) δ 4.57 – 4.17 (2H, m), 4.46 – 4.28 (1H, m), 2.24 – 2.15 (1H, m), 2.12 – 2.01 (1H, m), 1.98 (3H, d, *J* = 6.9 Hz); <sup>19</sup>F NMR (471 MHz, CDCl<sub>3</sub>) δ –78.3; <sup>13</sup>C NMR (101 MHz, CDCl<sub>3</sub>) δ 122.9 (q, *J*<sub>C-F</sub> = 340.2 Hz), 68.7, 42.3, 28.9, 22.9;

**Isomer 2:** <sup>1</sup>H NMR (400 MHz, CDCl<sub>3</sub>) δ 4.57 – 4.17 (2H, m), 4.46 – 4.28 (1H, m), 2.24 – 2.15 (1H, m), 2.12 – 2.01 (1H, m), 1.98 (3H, d, *J* = 6.9 Hz); <sup>19</sup>F NMR (471 MHz, CDCl<sub>3</sub>) δ –78.5; <sup>13</sup>C NMR (101 MHz, CDCl<sub>3</sub>) δ 122.9 (q, *J*<sub>C-F</sub> = 340.2 Hz), 69.2, 42.1, 28.9, 22.7.

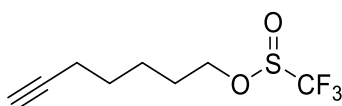

**Hept-6-yn-1-yl trifluoromethanesulfinate 3o:** Prepared according to **General Method C** (Eluent: 200:1 to 50:1 petroleum ether:ethyl acetate) and the title compound was isolated as a colorless oil (56.9 mg, 0.249 mmol, 83.1% yield). **IR** (thin film) 1185 (s), 1127 (s), 882 (m), 633 (m) cm<sup>-1</sup>; <sup>1</sup>H NMR (400 MHz, CDCl<sub>3</sub>) δ 4.38 – 4.10 (2H, m), 2.25 – 2.15 (2H, m), 1.94 – 1.93 (1H, m), 1.77 (2H, p, *J* = 6.7 Hz), 1.59 – 1.47 (4H, m); <sup>19</sup>F NMR (471 MHz, CDCl<sub>3</sub>) δ –78.6; <sup>13</sup>C NMR (101 MHz, CDCl<sub>3</sub>) δ 123.0 (q, *J*<sub>C-F</sub> = 340.1 Hz), 83.9, 68.9, 68.7, 29.3, 27.8, 24.5, 18.3; **HRMS** (ESI) *m/z*: [M+H]<sup>+</sup> Calcd for C<sub>8</sub>H<sub>12</sub>F<sub>3</sub>O<sub>2</sub>S 229.0510; Found 229.0502.

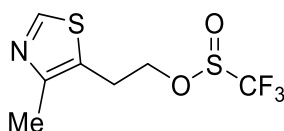

**2-(4-Methylthiazol-5-yl)ethyl trifluoromethanesulfinate 3p:** Prepared according to **General Method C** (Eluent: 50:1 to 3:1 petroleum ether:ethyl acetate) and the title compound was isolated as a colorless oil (76.6 mg, 0.295 mmol, 98.5% yield). **IR** (thin film) 1416 (w), 1185 (s), 1125 (s), 912 (m), 867 (m), 743 (w) cm<sup>-1</sup>; <sup>1</sup>H NMR (400 MHz, CDCl<sub>3</sub>) δ 8.59 (1H, s), 4.49 – 4.21 (2H, m), 3.19 (2H, t, *J* = 6.5 Hz), 2.38 (3H, s); <sup>19</sup>F NMR (471 MHz, CDCl<sub>3</sub>) δ –78.4; <sup>13</sup>C NMR (101 MHz, CDCl<sub>3</sub>) δ 150.7, 150.4, 125.0, 122.8 (q, *J*<sub>C-F</sub> = 340.2 Hz), 67.6, 27.0, 14.9; **HRMS** (ESI) *m/z*: [M+H]<sup>+</sup> Calcd for C<sub>7</sub>H<sub>9</sub>F<sub>3</sub>NO<sub>2</sub>S<sub>2</sub> 260.0021; Found 260.0029.

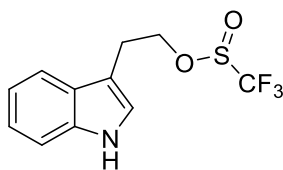

**2-((1*H*-Indol-3-yl)ethyl) trifluoromethanesulfinate 3q:** Prepared according to **General Method C** (Eluent: 50:1 to 5:1 petroleum ether:ethyl acetate) and the title compound was isolated as a yellow oil (41.9 mg, 0.151 mmol, 50.4% yield). **IR** (thin film) 3286 (w), 1489 (w), 1363 (w), 1153 (s), 1121 (s), 1062 (m), 992 (m), 743 (s)  $\text{cm}^{-1}$ ;  **$^1\text{H NMR}$**  (400 MHz,  $\text{CDCl}_3$ )  $\delta$  8.01 (1H, s), 7.48 (1H, d,  $J = 7.9$  Hz), 7.26 (1H, d,  $J = 8.0$  Hz), 7.13 (1H, dd,  $J = 6.6, 8.2$  Hz), 7.06 (1H, dd,  $J = 7.4, 7.4$  Hz), 6.94 (1H, s), 4.51 – 4.25 (2H, m), 3.12 (2H, t,  $J = 7.0$  Hz);  **$^{19}\text{F NMR}$**  (471 MHz,  $\text{CDCl}_3$ )  $\delta$  -78.6;  **$^{13}\text{C NMR}$**  (101 MHz,  $\text{CDCl}_3$ )  $\delta$  136.3, 127.1, 123.0 (q,  $J_{\text{C-F}} = 340.0$  Hz), 122.9, 122.4, 119.8, 118.4, 111.5, 110.0, 69.1, 26.2; **HRMS** (ESI)  $m/z$ :  $[\text{M}+\text{Na}]^+$  Calcd for  $\text{C}_{11}\text{H}_{10}\text{F}_3\text{NNaO}_2\text{S}$  300.0277; Found 300.0275.

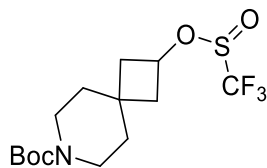

**tert-Butyl 2-(((trifluoromethyl)sulfinyl)oxy)-7-azaspiro[3.5]nonane-7-carboxylate 3r:** Prepared according to **General Method C** (Eluent: 100:1 to 15:1 petroleum ether: ethyl acetate) and the title compound was isolated as a white solid (99.6 mg, 0.280 mmol, 93.4% yield). **M.p.** = 63.4 – 64.5  $^{\circ}\text{C}$ ; **IR** (thin film) 1672 (m), 1416 (m), 1244 (m), 1186 (s), 1128 (s), 1000 (m), 881 (s), 817 (m), 771 (m)  $\text{cm}^{-1}$ ;  **$^1\text{H NMR}$**  (400 MHz,  $\text{CDCl}_3$ )  $\delta$  5.03 (1H, p,  $J = 7.1$  Hz), 3.31 – 3.25 (4H, m), 2.40 – 2.33 (2H, m), 2.08 – 1.98 (2H, m), 1.55 – 1.52 (2H, m), 1.50 – 1.47 (2H, m), 1.39 (9H, s);  **$^{19}\text{F NMR}$**  (471 MHz,  $\text{CDCl}_3$ )  $\delta$  -79.5;  **$^{13}\text{C NMR}$**  (101 MHz,  $\text{CDCl}_3$ )  $\delta$  154.8, 122.7 (q,  $J_{\text{C-F}} = 338.9$  Hz), 79.5, 70.7, 40.7, 40.4, 39.0, 36.0, 31.8, 28.4; **MS** (FI):  $m/z$  (%) 57, 302, 357. **HRMS** (FI) Calcd for  $\text{C}_{14}\text{H}_{22}\text{NF}_3\text{O}_4\text{S}$  357.1221; Found 357.1216.

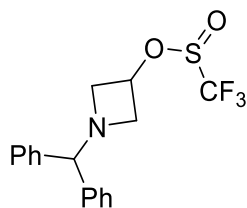

**1-Benzhydrylazetididin-3-yl trifluoromethanesulfinate 3s:** Prepared according to **General Method C** (Eluent: 100:1 to 20:1 petroleum ether: ethyl acetate) and the title compound was isolated as a colorless oil (84.1 mg, 0.237 mmol, 78.9% yield). **IR** (thin film) 1453 (w), 1193 (s), 1127 (s), 854 (m), 795 (m), 744 (s), 702 (s), 636 (m)  $\text{cm}^{-1}$ ;  **$^1\text{H}$  NMR** (400 MHz,  $\text{CDCl}_3$ )  $\delta$  7.37 (4H, d,  $J = 7.8$  Hz), 7.25 (4H, dd,  $J = 7.2, 7.7$  Hz), 7.18 – 7.14 (2H, m), 5.13 (1H, p,  $J = 5.7$  Hz), 4.37 (1H, s), 3.59 – 3.54 (2H, m), 3.20 – 3.14 (2H, m);  **$^{19}\text{F}$  NMR** (471 MHz,  $\text{CDCl}_3$ )  $\delta$  -79.1;  **$^{13}\text{C}$  NMR** (101 MHz,  $\text{CDCl}_3$ )  $\delta$  141.5, 128.7, 127.4, 122.8 (q,  $J_{\text{C-F}} = 339.7$  Hz), 78.2, 67.8, 60.7, 60.5; **HRMS** (ESI)  $m/z$ :  $[\text{M}+\text{H}]^+$  Calcd for  $\text{C}_{17}\text{H}_{17}\text{F}_3\text{NO}_2\text{S}$  356.0927; Found 356.0924.

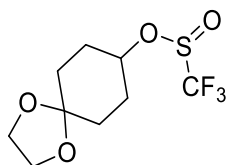

**1,4-Dioxaspiro[4.5]decan-8-yl trifluoromethanesulfinate 3t:** Prepared according to **General Method C** (Eluent: 100:1 to 20:1 petroleum ether: ethyl acetate) and the title compound was isolated as a colorless oil (70.4 mg, 0.257 mmol, 85.6% yield). **IR** (thin film) 1379 (w), 1190 (s), 1125 (s), 1034 (m), 918 (s), 872 (m), 805 (m), 666 (w)  $\text{cm}^{-1}$ ;  **$^1\text{H}$  NMR** (400 MHz,  $\text{CDCl}_3$ )  $\delta$  4.66 (1H, p,  $J = 5.1$  Hz), 3.96 – 3.88 (4H, m), 2.02 – 1.92 (4H, m), 1.88 – 1.77 (2H, m), 1.64 – 1.58 (2H, m);  **$^{19}\text{F}$  NMR** (471 MHz,  $\text{CDCl}_3$ )  $\delta$  -80.0;  **$^{13}\text{C}$  NMR** (101 MHz,  $\text{CDCl}_3$ )  $\delta$  122.8 (q,  $J_{\text{C-F}} = 337.7$  Hz), 107.4, 79.3, 64.5, 30.8, 30.6, 30.0, 29.9; **MS** (FI):  $m/z$  (%) 69. **HRMS** (FI) Calcd for  $\text{C}_9\text{H}_{13}\text{F}_3\text{O}_4\text{S}$  274.0480; Found 274.0481.

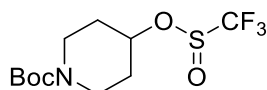

**tert-Butyl 4-(((trifluoromethyl)sulfinyl)oxy)piperidine-1-carboxylate 3u:** Prepared according to **General Method C** (Eluent: 100:1 to 10:1 petroleum ether: ethyl acetate) and the title compound was isolated as a colorless oil (71.1 mg, 0.224 mmol, 74.7% yield). **IR**



(thin film) 1691 (m), 1420 (m), 1366 (m), 1168 (s), 1126 (s), 1011 (m), 938 (m), 864 (m), 800 (m), 608 (w)  $\text{cm}^{-1}$ ;  $^1\text{H NMR}$  (400 MHz,  $\text{CDCl}_3$ )  $\delta$  4.75 – 4.70 (1H, m), 3.70 – 3.61 (2H, m), 3.32 – 3.26 (2H, m), 1.97 – 1.88 (2H, m), 1.85 – 1.70 (2H, m), 1.42 (9H, s);  $^{19}\text{F NMR}$  (471 MHz,  $\text{CDCl}_3$ )  $\delta$  -79.8;  $^{13}\text{C NMR}$  (101 MHz,  $\text{CDCl}_3$ )  $\delta$  154.6, 122.7 (q,  $J_{\text{C-F}} = 337.8$  Hz), 80.1, 78.4, 39.9, 32.1 (d,  $J_{\text{C-F}} = 17.7$  Hz), 28.4; **MS** (FI):  $m/z$  (%) 57, 149, 248, 260, 317. **HRMS** (FI) Calcd for  $\text{C}_{11}\text{H}_{18}\text{F}_3\text{O}_4\text{S}$  317.0905; Found 317.0903.

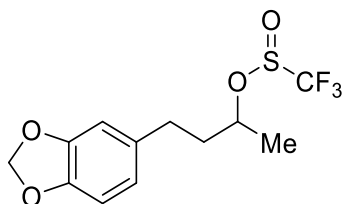

**4-(Benzo[d][1,3]dioxol-5-yl)butan-2-yl trifluoromethanesulfinate 3v:** Prepared according to **General Method C** (Eluent: 100:1 to 20:1 petroleum ether: ethyl acetate) and the title compound was isolated as a colorless oil (91.1 mg, 0.294 mmol, 98.0% yield, dr = 1:1.5). **IR** (thin film) 1489 (m), 1443 (w), 1245 (m), 1185 (s), 1126 (s), 1037 (s), 926 (m), 857 (s), 809 (m)  $\text{cm}^{-1}$ ; **HRMS** (ESI)  $m/z$ :  $[\text{M}+\text{Na}]^+$  Calcd for  $\text{C}_{12}\text{H}_{13}\text{F}_3\text{NaO}_4\text{S}$  333.0379; Found 333.0369.

**Isomer 1:**  $^1\text{H NMR}$  (400 MHz,  $\text{CDCl}_3$ )  $\delta$  6.74 (1H, s), 6.64 – 6.59 (2H, m), 5.92 (2H, s), 4.65 – 4.53 (1H, m), 2.75 – 2.68 (2H, m), 2.10 – 1.84 (2H, m), 1.48 (3H, d,  $J = 6.3$  Hz);  $^{19}\text{F NMR}$  (471 MHz,  $\text{CDCl}_3$ )  $\delta$  -79.7;  $^{13}\text{C NMR}$  (101 MHz,  $\text{CDCl}_3$ )  $\delta$  147.9, 146.1, 134.3, 122.8 (q,  $J_{\text{C-F}} = 337.2$  Hz), 121.2, 108.8, 108.4, 101.0, 80.7, 39.2, 30.9, 21.8;

**Isomer 2:**  $^1\text{H NMR}$  (500 MHz,  $\text{CDCl}_3$ )  $\delta$  6.72 (1H, s), 6.69 – 6.65 (2H, m), 5.92 (2H, s), 4.65 – 4.53 (1H, m), 2.65 – 2.54 (2H, m), 2.10 – 1.84 (2H, m), 1.42 (3H, d,  $J = 6.2$  Hz);  $^{19}\text{F NMR}$  (471 MHz,  $\text{CDCl}_3$ )  $\delta$  -80.2;  $^{13}\text{C NMR}$  (101 MHz,  $\text{CDCl}_3$ )  $\delta$  147.9, 146.0, 134.3, 122.7 (q,  $J_{\text{C-F}} = 336.5$  Hz), 121.4, 108.9, 108.4, 101.0, 80.4, 38.9, 30.9, 21.6.

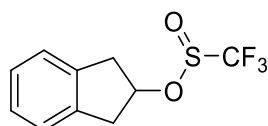

**2,3-Dihydro-1H-inden-2-yl trifluoromethanesulfinate 3w:** Prepared according to **General Method C** (Eluent: 100:1 to 20:1 petroleum ether: ethyl acetate) and the title compound was isolated as a colorless oil (70.9 mg, 0.299 mmol, 99.6% yield). **IR** (thin

film) 1184 (s), 1125 (s), 995 (w), 853 (m), 739 (m)  $\text{cm}^{-1}$ ;  $^1\text{H NMR}$  (400 MHz,  $\text{CDCl}_3$ )  $\delta$  7.27 – 7.18 (4H, m), 5.47 – 5.42 (1H, m), 3.41 – 3.33 (2H, m), 3.29 – 3.16 (2H, m);  $^{19}\text{F NMR}$  (471 MHz,  $\text{CDCl}_3$ )  $\delta$  -79.2;  $^{13}\text{C NMR}$  (101 MHz,  $\text{CDCl}_3$ )  $\delta$  139.0 (d,  $J_{\text{C-F}} = 17.8$  Hz), 127.4 (d,  $J_{\text{C-F}} = 2.7$  Hz), 124.8 (d,  $J_{\text{C-F}} = 5.1$  Hz), 122.8 (q,  $J_{\text{C-F}} = 338.7$  Hz), 82.5, 40.6 (d,  $J_{\text{C-F}} = 49.5$  Hz); **HRMS** (ESI)  $m/z$ :  $[\text{M}+\text{Na}]^+$  Calcd for  $\text{C}_{10}\text{H}_9\text{F}_3\text{NaO}_2\text{S}$  273.0168; Found 273.0168.

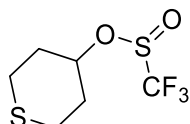

**Tetrahydro-2H-thiopyran-4-yl trifluoromethanesulfinate 3x:** Prepared according to **General Method C** (Eluent: 100:1 to 20:1 petroleum ether: ethyl acetate) and the title compound was isolated as a colorless oil (65.4 mg, 0.279 mmol, 93.1% yield). **IR** (thin film) 1432 (w), 1183 (s), 1124 (s), 972 (m), 915 (m), 875 (m), 768 (m), 663 (w), 637 (m)  $\text{cm}^{-1}$ ;  $^1\text{H NMR}$  (400 MHz,  $\text{CDCl}_3$ )  $\delta$  4.63 (1H, tt,  $J = 7.6, 3.2$  Hz), 2.91 – 2.81 (2H, m), 2.59 – 2.53 (2H, m), 2.27 – 2.16 (2H, m), 2.10 – 1.99 (2H, m);  $^{19}\text{F NMR}$  (471 MHz,  $\text{CDCl}_3$ )  $\delta$  -79.8;  $^{13}\text{C NMR}$  (101 MHz,  $\text{CDCl}_3$ )  $\delta$  122.6 (q,  $J_{\text{C-F}} = 337.5$  Hz), 79.4, 33.8, 24.9; **MS** (FI):  $m/z$  (%) 101, 165, 234. **HRMS** (FI) Calcd for  $\text{C}_6\text{H}_9\text{F}_3\text{O}_2\text{S}_2$  233.9988; Found 233.9991.

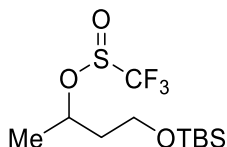

**4-((tert-Butyldimethylsilyloxy)butan-2-yl trifluoromethanesulfinate 3y:** Prepared according to **General Method C** (Eluent: 200:1 to 50:1 petroleum ether: ethyl acetate) and the title compound was isolated as a colorless oil (69.5 mg, 0.217 mmol, 72.3% yield, dr = 1:1). **IR** (thin film) 2931 (w), 1194 (s), 1131 (s), 1086 (m), 886 (m), 828 (s), 776 (s)  $\text{cm}^{-1}$ ; **HRMS** (ESI)  $m/z$ :  $[\text{M}+\text{H}]^+$  Calcd for  $\text{C}_{11}\text{H}_{23}\text{F}_3\text{O}_3\text{SSi}$  321.1162; Found 321.1168.

**Isomer 1:**  $^1\text{H NMR}$  (400 MHz,  $\text{CDCl}_3$ )  $\delta$  4.88 – 4.77 (1H, m), 3.77 – 3.69 (2H, m), 1.97 – 1.87 (2H, m), 1.49 (3H, d,  $J = 6.4$  Hz), 0.88 (9H, s), 0.06 (3H, s), 0.04 (3H, s);  $^{19}\text{F NMR}$  (471 MHz,  $\text{CDCl}_3$ )  $\delta$  -80.1;  $^{13}\text{C NMR}$  (101 MHz,  $\text{CDCl}_3$ )  $\delta$  122.8 (q,  $J_{\text{C-F}} = 336.6$  Hz), 79.0, 58.4, 40.1, 26.0, 22.2, 18.3, -5.4;

**Isomer 2:**  $^1\text{H NMR}$  (400 MHz,  $\text{CDCl}_3$ )  $\delta$  4.88 – 4.77 (1H, m), 3.68 – 3.65 (2H, m), 1.87 – 1.77 (2H, m), 1.42 (3H, d,  $J = 6.3$  Hz), 0.88 (9H, s), 0.05 (3H, s), 0.03 (3H, s);  $^{19}\text{F NMR}$  (471 MHz,  $\text{CDCl}_3$ )  $\delta$  –80.7;  $^{13}\text{C NMR}$  (101 MHz,  $\text{CDCl}_3$ )  $\delta$  122.8 (q,  $J_{\text{C-F}} = 336.6$  Hz), 79.0, 58.3, 39.9, 25.9, 21.8, 18.3, –5.5.

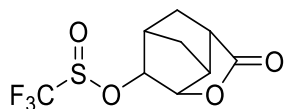

**2-Oxo-2-(trifluoromethylsulfonyloxy)hexahydro-2H-3,5-methanocyclopenta[b]furan-6-yl trifluoromethanesulfinate**

**3z:** Prepared according to **General Method C** (Eluent: 50:1 to 5:1 petroleum ether: ethyl acetate) and the title compound was isolated as a colorless oil (70.1 mg, 0.259 mmol, 86.4% yield, dr = 1: 1.6). **IR** (thin film) 1782 (s), 1175 (s), 1125 (s), 1037 (m), 1009 (m), 961 (s), 931 (s), 840 (m), 796 (s), 772.9 (s), 732 (m)  $\text{cm}^{-1}$ ; **HRMS** (ESI)  $m/z$ :  $[\text{M}+\text{H}]^+$  Calcd for  $\text{C}_9\text{H}_{10}\text{F}_3\text{O}_4\text{S}$  271.0246; Found 271.0241.

**Isomer 1:**  $^1\text{H NMR}$  (400 MHz,  $\text{CDCl}_3$ )  $\delta$  4.62 (1H, d,  $J = 5.0$  Hz), 4.43 (1H, s), 3.29 – 3.26 (1H, m), 2.73 (1H, d,  $J = 2.8$  Hz), 2.61 – 2.57 (1H, m), 2.16 – 2.07 (2H, m), 1.76 – 1.71 (2H, m);  $^{19}\text{F NMR}$  (471 MHz,  $\text{CDCl}_3$ )  $\delta$  –79.4;  $^{13}\text{C NMR}$  (101 MHz,  $\text{CDCl}_3$ )  $\delta$  178.9, 122.6 (q,  $J_{\text{C-F}} = 337.9$  Hz), 85.0, 84.8, 44.9, 42.7, 37.6, 33.9, 31.3;

**Isomer 2:**  $^1\text{H NMR}$  (400 MHz,  $\text{CDCl}_3$ )  $\delta$  4.72 (1H, d,  $J = 5.0$  Hz), 4.50 (1H, s), 3.29 – 3.26 (1H, m), 2.61 – 2.57 (2H, m), 2.16 – 2.07 (2H, m), 1.76 – 1.71 (2H, m);  $^{19}\text{F NMR}$  (471 MHz,  $\text{CDCl}_3$ )  $\delta$  –79.2;  $^{13}\text{C NMR}$  (101 MHz,  $\text{CDCl}_3$ )  $\delta$  178.9, 122.7 (q,  $J_{\text{C-F}} = 338.8$  Hz), 84.6, 83.9, 44.9, 42.7, 37.6, 33.8, 31.3.

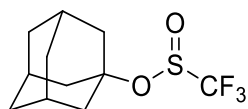

**(3S,5S,7S)-Adamantan-1-yl trifluoromethanesulfinate 3aa:** Prepared according to **General Method C** (Eluent: 200:1 to 50:1 petroleum ether: ethyl acetate) and the title compound was isolated as a colorless oil (37.8 mg, 0.141 mmol, 47.0% yield).  $^1\text{H NMR}$  (400 MHz,  $\text{CDCl}_3$ )  $\delta$  2.28 (3H, s), 2.04 (6H, d,  $J = 2.2$  Hz), 1.71 – 1.62 (6H, m);  $^{19}\text{F NMR}$  (471 MHz,  $\text{CDCl}_3$ )  $\delta$  –80.7;  $^{13}\text{C NMR}$  (101 MHz,  $\text{CDCl}_3$ )  $\delta$  122.9 (q,  $J_{\text{C-F}} = 335.0$  Hz), 86.7, 43.4, 35.5, 31.4. Spectra were consistent with literature data<sup>8</sup>.

## 2. General Method D:

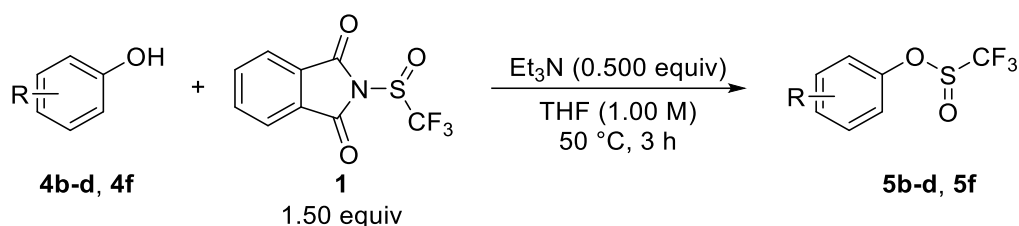

A 120 °C oven-dried 25-mL glass schlenck, equipped with a stir bar, was charged with 2-((trifluoromethyl)sulfinyl)isoindoline-1,3-dione (0.750 mmol, 1.50 equiv, 197.4 mg), phenol (0.500 mmol, 1.00 equiv). The mixture was evacuated and backfilled with nitrogen for three times. Then dry THF (5.00 mL, 0.100 M) and Et<sub>3</sub>N (0.250 mmol, 0.500 equiv, 25.2 mg) was added under N<sub>2</sub> atmosphere. The mixture was allowed to stir for 5 h at 50 °C. The solvent was removed by rotary evaporation and the residue was purified by silica gel chromatography.

## 3. General Method E:

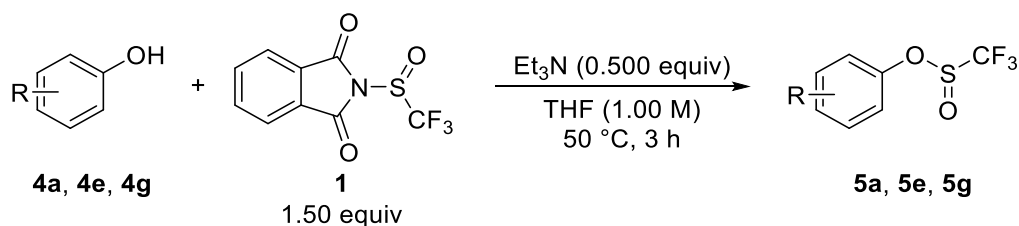

A 120 °C oven-dried 25-mL glass schlenck, equipped with a stir bar, was charged with 2-((trifluoromethyl)sulfinyl)isoindoline-1,3-dione (1.50 mmol, 1.50 equiv, 394.8 mg), phenol (1.00 mmol, 1.00 equiv). The mixture was evacuated and backfilled with nitrogen for three times. Then dry THF (5.00 mL, 0.100 M) and Et<sub>3</sub>N (0.500 mmol, 0.500 equiv, 50.1 mg) was added under N<sub>2</sub> atmosphere. The mixture was allowed to stir for 5 h at 50 °C. The solvent was removed by rotary evaporation and petroleum ether (20 mL) was added. The mixture was filtered and the solvent was removed by rotary evaporation to give the final product.

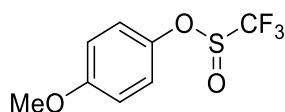

**4-methoxyphenyl trifluoromethanesulfinate 5a:** Prepared according to **General Method E** and the title compound was isolated as a colorless oil (195.0 mg, 0.812 mmol, 81.2% yield). **<sup>1</sup>H NMR** (400 MHz, CDCl<sub>3</sub>) δ 7.13 (2H, d, *J* = 9.0 Hz), 6.89 (2H, d, *J* = 9.0 Hz), 3.79 (3H, s); **<sup>19</sup>F NMR** (471 MHz, CDCl<sub>3</sub>) δ -80.4; **<sup>13</sup>C NMR** (101 MHz, CDCl<sub>3</sub>) δ 158.6, 145.3, 122.8 (q, *J*<sub>C-F</sub> = 337.3 Hz), 122.3, 115.3, 55.7. Spectra were consistent with literature data<sup>9</sup>.

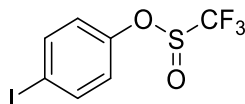

**4-iodophenyl trifluoromethanesulfinate 5b:** Prepared according to **General Method D** (Eluent: 100:0 to 50:1 petroleum ether: ethyl acetate) and the title compound was isolated as a colorless oil (107.2 mg, 0.319 mmol, 63.8% yield). **IR** (thin film) 2923 (w), 1478 (s), 1191 (s), 1155 (s), 1122 (s), 1055 (m), 1008 (s), 828 (s), 727 (s), 695 (s), 628 (m) cm<sup>-1</sup>; **<sup>1</sup>H NMR** (400 MHz, CDCl<sub>3</sub>) δ 7.73 (2H, d, *J* = 8.8 Hz), 6.98 (6H, d, *J* = 8.8 Hz); **<sup>19</sup>F NMR** (471 MHz, CDCl<sub>3</sub>) δ -79.9; **<sup>13</sup>C NMR** (101 MHz, CDCl<sub>3</sub>) δ 151.8, 139.6, 123.0, 122.8 (q, *J*<sub>C-F</sub> = 337.2 Hz), 91.6. **MS** (FI): *m/z* (%) 84, 220, 336. **HRMS** (FI) Calcd for C<sub>7</sub>H<sub>4</sub>F<sub>3</sub>O<sub>2</sub>SI 335.8929; Found 335.8922.

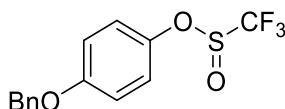

**4-(benzyloxy)phenyl trifluoromethanesulfinate 5c:** Prepared according to **General Method D** (Eluent: 200:1 to 50:1 petroleum ether: ethyl acetate) and the title compound was isolated as a white solid (138.7 mg, 0.439 mmol, 87.7% yield). **M.p.** = 58.3 – 58.9 °C; **IR** (thin film) 3248 (w), 1503 (s), 1191 (s), 1155 (s), 1119 (s), 1007 (s), 833 (s), 795 (s), 751 (s), 695 (s), 621 (m) cm<sup>-1</sup>; **<sup>1</sup>H NMR** (500 MHz, CDCl<sub>3</sub>) δ 7.48 – 7.35 (5H, m), 7.16 (2H, d, *J* = 9.1 Hz), 7.00 (2H, d, *J* = 9.1 Hz), 5.08 (2H, s); **<sup>19</sup>F NMR** (471 MHz, CDCl<sub>3</sub>) δ -79.2; **<sup>13</sup>C NMR** (126 MHz, CDCl<sub>3</sub>) δ 157.7, 145.5, 136.5, 128.8, 128.3, 127.6, 122.3, 122.8 (q, *J*<sub>C-F</sub> = 336.6 Hz), 116.3, 70.6; **MS** (FI): *m/z* (%) 36, 99, 200, 316. **HRMS** (FI) Calcd for C<sub>14</sub>H<sub>11</sub>F<sub>3</sub>O<sub>3</sub>S 316.0381; Found 316.0376.

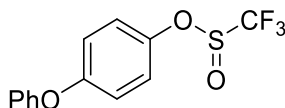

**4-phenoxyphenyl trifluoromethanesulfinate 5d:** Prepared according to **General Method D** (Eluent: 200:1 to 50:1 petroleum ether: ethyl acetate) and the title compound was isolated as a colorless oil (105.9 mg, 0.351 mmol, 70.1% yield). **IR** (thin film) 3047 (w), 1588 (m), 1487 (s), 1193 (s), 1163 (s), 1126 (s), 829 (s), 789 (s), 751 (s), 690 (s)  $\text{cm}^{-1}$ ;  **$^1\text{H}$  NMR** (400 MHz,  $\text{CDCl}_3$ )  $\delta$  7.38 (3H, dd,  $J = 7.8, 8.0$  Hz), 7.23 – 7.12 (3H, m), 7.03 (4H, d,  $J = 8.8$  Hz);  **$^{19}\text{F}$  NMR** (471 MHz,  $\text{CDCl}_3$ )  $\delta$  -79.1;  **$^{13}\text{C}$  NMR** (101 MHz,  $\text{CDCl}_3$ )  $\delta$  156.7, 156.4, 147.0, 130.1, 124.1, 122.8 (q,  $J_{\text{C-F}} = 337.2$  Hz), 122.6, 120.1, 119.3; **MS** (FI):  $m/z$  (%) 186, 302. **HRMS** (FI) Calcd for  $\text{C}_{13}\text{H}_9\text{F}_3\text{O}_3\text{S}$  302.0224; Found 302.0219.

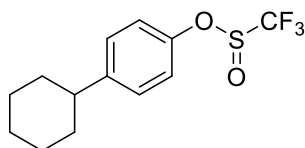

**4-cyclohexylphenyl trifluoromethanesulfinate 5e:** Prepared according to **General Method E** and the title compound was isolated as a colorless oil (243.2 mg, 0.832 mmol, 83.2% yield). **IR** (thin film) 2926 (m), 2853 (m), 1504 (m), 1191 (s), 1127 (s), 837 (s), 773 (s), 708 (m), 615 (m)  $\text{cm}^{-1}$ ;  **$^1\text{H}$  NMR** (400 MHz,  $\text{CDCl}_3$ )  $\delta$  7.22 (2H, d,  $J = 8.6$  Hz), 7.10 (2H, d,  $J = 8.6$  Hz), 2.50 (1H, t,  $J = 9.7$  Hz), 1.84 – 1.72 (5H, m), 1.43 – 1.22 (5H, m);  **$^{19}\text{F}$  NMR** (471 MHz,  $\text{CDCl}_3$ )  $\delta$  -80.4;  **$^{13}\text{C}$  NMR** (101 MHz,  $\text{CDCl}_3$ )  $\delta$  150.0, 147.5, 128.7, 122.8 (q,  $J_{\text{C-F}} = 336.8$  Hz), 120.7, 44.1, 34.6, 26.9, 26.1; **MS** (FI):  $m/z$  (%) 65, 82, 186, 248, 292. **HRMS** (FI) Calcd for  $\text{C}_{13}\text{H}_{15}\text{F}_3\text{O}_2\text{S}$  292.0745; Found 292.0739.

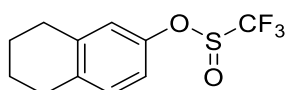

**5,6,7,8-tetrahydronaphthalen-2-yl trifluoromethanesulfinate 5f:** Prepared according to **General Method D** (Eluent: 100:1 to 50:1 petroleum ether: ethyl acetate) and the title compound was isolated as a colorless oil (65.7 mg, 0.249 mmol, 49.7% yield). **IR** (thin film) 2936 (w), 1493 (m), 1190 (s), 1126 (s), 916 (m), 774 (s), 689 (m)  $\text{cm}^{-1}$ ;  **$^1\text{H}$  NMR** (400 MHz,  $\text{CDCl}_3$ )  $\delta$  7.08 (1H, d,  $J = 9.0$  Hz), 6.93 – 6.91 (2H, m), 2.76 (4H, d,  $J = 4.4$  Hz), 1.80 (4H, p,  $J = 3.3$  Hz);  **$^{19}\text{F}$  NMR** (471 MHz,  $\text{CDCl}_3$ )  $\delta$  -80.5;  **$^{13}\text{C}$  NMR** (101 MHz,  $\text{CDCl}_3$ )  $\delta$  149.7, 139.8, 136.5, 130.9, 122.8 (q,  $J_{\text{C-F}} = 337.1$  Hz), 121.1, 117.9, 29.6, 29.0, 23.0, 22.8; **MS** (FI):  $m/z$  (%) 131, 148, 195, 264. **HRMS** (FI) Calcd for  $\text{C}_{11}\text{H}_{11}\text{F}_3\text{O}_2\text{S}$  264.0432; Found 264.0426.

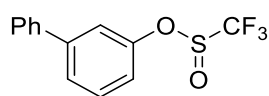

**[1,1'-biphenyl]-3-yl trifluoromethanesulfinate 5g:** Prepared according to **General Method E** and the title compound was isolated as a colorless oil (187.2 mg, 0.654 mmol, 65.4% yield).  $^1\text{H NMR}$  (400 MHz,  $\text{CDCl}_3$ )  $\delta$  7.40 – 7.34 (3H, m), 7.30 – 7.20 (5H, m), 7.01 (1H, d,  $J = 7.3$  Hz);  $^{19}\text{F NMR}$  (471 MHz,  $\text{CDCl}_3$ )  $\delta$  -80.2;  $^{13}\text{C NMR}$  (101 MHz,  $\text{CDCl}_3$ )  $\delta$  152.5, 144.0, 139.3, 130.7, 129.0, 128.2, 127.2, 125.9, 122.9 (q,  $J_{\text{C-F}} = 337.0$  Hz), 119.4, 119.3. Spectra were consistent with literature data<sup>9</sup>.

### **3. General Method F:**

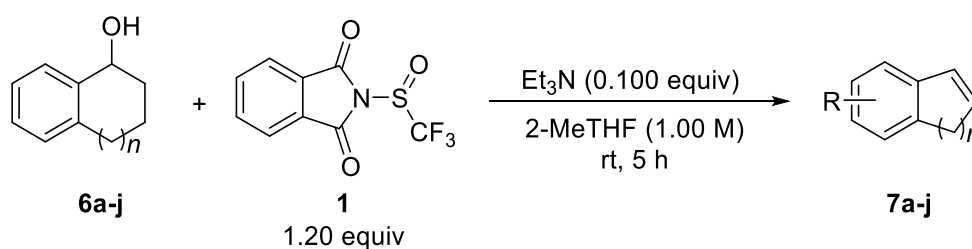

A 120 °C oven-dried 25-mL glass schlenck, equipped with a stir bar, was charged with 2-((trifluoromethyl)sulfinyl)isoindoline-1,3-dione (0.360 mmol, 1.20 equiv, 94.8 mg), alcohol (0.300 mmol, 1.00 equiv). The mixture was evacuated and backfilled with nitrogen for three times. Then dry 2-MeTHF (3.00 mL, 0.100 M) and  $\text{Et}_3\text{N}$  (0.0300 mmol, 0.100 equiv, 3.00 mg) was added under  $\text{N}_2$  atmosphere. The mixture was allowed to stir for 5 h at room temperature. The solvent was removed by rotary evaporation and the residue was purified by silica gel chromatography.

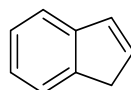

**1H-indene 7a:** Prepared according to **General Method F** (Eluent: 200 mL petroleum ether) and the title compound was isolated as a colorless oil (42.8 mg, 0.368 mmol, 73.7% yield).  $^1\text{H NMR}$  (400 MHz,  $\text{CDCl}_3$ )  $\delta$  7.45 (1H, d,  $J = 7.4$  Hz), 7.38 (1H, d,  $J = 7.5$  Hz), 7.23 (1H, d,  $J = 9.0$  Hz), 7.18 – 7.14 (1H, m), 6.86 (1H, d,  $J = 5.5$  Hz), 6.54 – 6.52 (1H, m), 3.37 (2H,

s);  $^{13}\text{C}$  NMR (101 MHz,  $\text{CDCl}_3$ )  $\delta$  145.0, 143.8, 134.3, 132.2, 126.3, 124.7, 123.8, 121.1, 39.2. Spectra were consistent with literature data<sup>10</sup>.

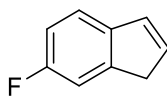

**6-Fluoro-1H-indene 7b:** Prepared according to **General Method F** (Eluent: 200 mL petroleum ether) and the title compound was isolated as a colorless oil (51.3 mg, 0.382 mmol, 76.5% yield).  $^1\text{H}$  NMR (400 MHz,  $\text{CDCl}_3$ )  $\delta$  7.32 (1H, dd,  $J = 8.3, 5.1$  Hz), 7.21 – 7.19 (1H, m), 7.03 – 6.97 (1H, m), 6.86 (1H, d,  $J = 5.5$  Hz), 6.55 – 6.52 (1H, m), 3.40 (2H, s);  $^{13}\text{C}$  NMR (101 MHz,  $\text{CDCl}_3$ )  $\delta$  161.5 (d,  $J_{\text{C-F}} = 243.2$  Hz), 145.8 (d,  $J_{\text{C-F}} = 8.8$  Hz), 140.9 (d,  $J_{\text{C-F}} = 2.6$  Hz), 133.9 (d,  $J_{\text{C-F}} = 3.8$  Hz), 131.4, 121.4 (d,  $J_{\text{C-F}} = 8.7$  Hz), 113.2 (d,  $J_{\text{C-F}} = 22.8$  Hz), 111.5 (d,  $J_{\text{C-F}} = 23.0$  Hz), 39.4 (d,  $J_{\text{C-F}} = 2.3$  Hz). Spectra were consistent with literature data<sup>11</sup>.

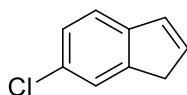

**6-Chloro-1H-indene 7c:** Prepared according to **General Method F** (Eluent: 200 mL petroleum ether) and the title compound was isolated as a colorless oil (49.0 mg, 0.325 mmol, 65.1% yield).  $^1\text{H}$  NMR (400 MHz,  $\text{CDCl}_3$ )  $\delta$  7.47 (1H, s), 7.33 (1H, d,  $J = 8.0$  Hz), 7.27 (1H, d,  $J = 8.2$  Hz), 6.86 (1H, d,  $J = 5.5$  Hz), 6.59 – 6.57 (1H, m), 3.41 (2H, s);  $^{13}\text{C}$  NMR (101 MHz,  $\text{CDCl}_3$ )  $\delta$  145.5, 143.4, 134.7, 131.5, 130.7, 126.6, 124.3, 121.7, 39.2. Spectra were consistent with literature data<sup>11</sup>.

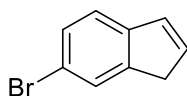

**6-Bromo-1H-indene 7d:** Prepared according to **General Method F** (Eluent: 200 mL petroleum ether) and the title compound was isolated as a colorless oil (49.1 mg, 0.252 mmol, 50.3% yield).  $^1\text{H}$  NMR (400 MHz,  $\text{CDCl}_3$ )  $\delta$  7.61 (1H, s), 7.41 (1H, dd,  $J = 8.0, 1.6$  Hz), 7.26 (1H, d,  $J = 8.0$  Hz), 6.84 (1H, d,  $J = 5.5$  Hz), 6.57 – 6.54 (1H, m), 3.39 (2H, s);  $^{13}\text{C}$  NMR (101 MHz,  $\text{CDCl}_3$ )  $\delta$  145.9, 143.8, 134.7, 131.6, 129.4, 127.1, 122.2, 118.8, 39.2. Spectra were consistent with literature data<sup>11</sup>.

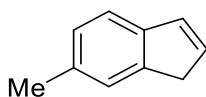



**6-Methyl-1H-indene 7e:** Prepared according to **General Method F** (Eluent: 200 mL petroleum ether) and the title compound was isolated as a colorless oil (41.9 mg, 0.322 mmol, 64.4% yield). **<sup>1</sup>H NMR** (400 MHz, CDCl<sub>3</sub>)  $\delta$  7.32 (2H, d,  $J = 7.5$  Hz), 7.12 (1H, d,  $J = 8.0$  Hz), 6.88 (1H, d,  $J = 5.5$  Hz), 6.52 – 6.50 (1H, m), 3.39 (2H, s), 2.43 (3H, s); **<sup>13</sup>C NMR** (101 MHz, CDCl<sub>3</sub>)  $\delta$  144.1, 142.3, 134.3, 133.3, 131.9, 127.1, 124.8, 120.7, 39.0, 21.6. Spectra were consistent with literature data<sup>11</sup>.

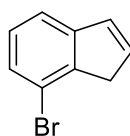

**7-Bromo-1H-indene 7f:** Prepared according to **General Method F** (Eluent: 200 mL petroleum ether) and the title compound was isolated as a colorless oil (40.7 mg, 0.209 mmol, 41.7% yield). **<sup>1</sup>H NMR** (400 MHz, CDCl<sub>3</sub>)  $\delta$  7.34 (2H, dd,  $J = 7.6, 5.2$  Hz), 7.17 (1H, dd,  $J = 7.4, 5.0$  Hz), 6.93 – 6.91 (1H, m), 6.63 – 6.61 (1H, m), 3.40 (2H, t,  $J = 1.6$  Hz); **<sup>13</sup>C NMR** (101 MHz, CDCl<sub>3</sub>)  $\delta$  146.4, 143.9, 134.8, 132.2, 128.3, 127.9, 120.1, 119.0, 40.9. Spectra were consistent with literature data<sup>11</sup>.

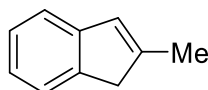

**6-Methyl-1H-indene 7g:** Prepared according to **General Method F** (Eluent: 200 mL petroleum ether) and the title compound was isolated as a colorless oil (45.8 mg, 0.352 mmol, 70.4% yield). **<sup>1</sup>H NMR** (400 MHz, CDCl<sub>3</sub>)  $\delta$  7.40 (1H, d,  $J = 7.3$  Hz), 7.29 – 7.22 (2H, m), 7.12 (1H, dd,  $J = 7.2, 7.2$  Hz), 6.51 (1H, s), 3.32 (2H, s), 2.18 (3H, s); **<sup>13</sup>C NMR** (101 MHz, CDCl<sub>3</sub>)  $\delta$  146.2, 146.0, 143.5, 127.3, 126.3, 123.6, 123.4, 119.8, 42.8, 16.9. Spectra were consistent with literature data<sup>12</sup>.

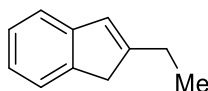

**2-Ethyl-1H-indene 7h:** Prepared according to **General Method F** (Eluent: 200 mL petroleum ether) and the title compound was isolated as a colorless oil (50.2 mg, 0.348 mmol, 69.6% yield). **<sup>1</sup>H NMR** (400 MHz, CDCl<sub>3</sub>)  $\delta$  7.43 (1H, d,  $J = 7.4$  Hz), 7.33 (1H, d,  $J = 7.3$  Hz), 7.27 (1H, dd,  $J = 7.2, 7.2$  Hz), 7.17 – 7.13 (1H, m), 6.56 (1H, s), 3.36



mixture was allowed to stir for 5 h at room temperature. The solvent was removed by rotary evaporation and the residue was purified by flash silica gel chromatography.

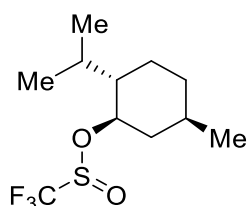

**(1*R*,2*S*,5*R*)-2-Isopropyl-5-methylcyclohexyl trifluoromethanesulfinate 9a:** Prepared according to **General Method C** (Eluent: 100:1 to 20:1 petroleum ether: ethyl acetate) and the title compound was isolated as a colorless oil (71.7 mg, 0.263 mmol, 87.8% yield, dr = 1: 1.5).

**Isomer 1:**  $^1\text{H NMR}$  (400 MHz,  $\text{CDCl}_3$ )  $\delta$  4.26 (1H, dd,  $J = 9.9, 4.5$  Hz), 2.20 – 2.00 (2H, m), 1.77 – 1.67 (2H, m), 1.54 – 1.42 (2H, m), 1.41 – 1.27 (2H, m), 1.10 – 0.98 (1H, m), 0.94 (3H, d,  $J = 6.4$  Hz), 0.91 (3H, d,  $J = 7.4$  Hz), 0.76 (3H, d,  $J = 7.0$  Hz);  $^{19}\text{F NMR}$  (471 MHz,  $\text{CDCl}_3$ )  $\delta$  -80.0;  $^{13}\text{C NMR}$  (101 MHz,  $\text{CDCl}_3$ )  $\delta$  122.8 (q,  $J_{\text{C-F}} = 336.7$  Hz), 85.5, 48.1, 42.9, 33.7, 32.0, 25.3, 23.1, 21.9, 20.8, 15.4;

**Isomer 2:**  $^1\text{H NMR}$  (400 MHz,  $\text{CDCl}_3$ )  $\delta$  4.21 (dd,  $J = 10.7, 4.5$  Hz, 1H), 2.20 – 2.00 (2H, m), 1.77 – 1.67 (2H, m), 1.54 – 1.42 (2H, m), 1.26 – 1.20 (1H, m), 1.10 – 0.98 (1H, m), 0.94 (3H, d,  $J = 6.5$  Hz), 0.92 (3H, d,  $J = 7.1$  Hz), 0.87 – 0.83 (1H, m), 0.79 (3H, d,  $J = 6.9$  Hz);  $^{19}\text{F NMR}$  (471 MHz,  $\text{CDCl}_3$ )  $\delta$  -80.6;  $^{13}\text{C NMR}$  (101 MHz,  $\text{CDCl}_3$ )  $\delta$  122.7 (q,  $J_{\text{C-F}} = 335.9$  Hz), 84.6, 47.9, 42.2, 33.7, 31.9, 25.5, 23.3, 21.9, 20.7, 15.6. Spectra were consistent with literature data<sup>8</sup>.

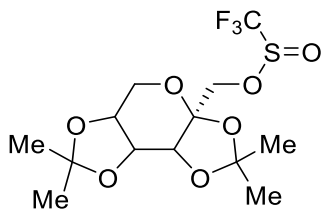

**((3*aS*)-2,2,7,7-Tetramethyltetrahydro-3*aH*-bis([1,3]dioxolo)[4,5-*b*:4',5'-*d*]pyran-3*a*-yl)methyl trifluoromethanesulfinate 9b:** Prepared according to **General Method C** (Eluent: 100:1 to 10:1 petroleum ether: ethyl acetate) and the title compound was isolated as a colorless oil (103.4 mg, 0.275 mmol, 91.6% yield, dr = 1: 1.5).

**Isomer 1:**  $^1\text{H NMR}$  (400 MHz,  $\text{CDCl}_3$ )  $\delta$  4.62 – 4.58 (1H, m), 4.29 (2H, dd,  $J = 18.8$ , 2.6 Hz), 4.23 – 4.17 (2H, m), 3.91 (1H, dd,  $J = 5.7$ , 1.8 Hz), 3.74 (1H, s), 1.52 (3H, s), 1.44 (3H, s), 1.37 (3H, s), 1.32 (3H, s);  $^{19}\text{F NMR}$  (471 MHz,  $\text{CDCl}_3$ )  $\delta$  -78.9;  $^{13}\text{C NMR}$  (101 MHz,  $\text{CDCl}_3$ )  $\delta$  123.0 (q,  $J_{\text{C-F}} = 340.2$  Hz), 109.8, 109.4, 100.8, 70.7, 70.1, 69.9, 68.5, 61.6, 26.6, 25.9, 25.3, 24.0;

**Isomer 2:**  $^1\text{H NMR}$  (400 MHz,  $\text{CDCl}_3$ )  $\delta$  4.62 – 4.58 (1H, m), 4.40 (1H, d,  $J = 11.0$  Hz), 4.30 – 4.26 (1H, m), 4.23 – 4.17 (1H, m), 4.06 (1H, d,  $J = 11.0$  Hz), 3.88 (1H, dd,  $J = 5.7$ , 1.8 Hz), 3.77 (1H, s), 1.52 (3H, s), 1.44 (3H, s), 1.36 (3H, s), 1.32 (3H, s);  $^{19}\text{F NMR}$  (471 MHz,  $\text{CDCl}_3$ )  $\delta$  -78.5;  $^{13}\text{C NMR}$  (101 MHz,  $\text{CDCl}_3$ )  $\delta$  122.9 (q,  $J_{\text{C-F}} = 340.0$  Hz), 109.8, 109.3, 100.8, 70.6, 70.4, 69.9, 67.2, 61.5, 26.5, 25.8, 25.1, 24.0. Spectra were consistent with literature data<sup>14</sup>.

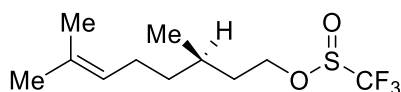

**(R)-3,7-Dimethyloct-6-en-1-yl trifluoromethanesulfinate 9c:** Prepared according to **General Method C** (Eluent: 100:1 to 20:1 petroleum ether: ethyl acetate) and the title compound was isolated as a colorless oil (68.3 mg, 0.251 mmol, 83.6% yield, dr = 1: 1).

**Isomer 1:**  $^1\text{H NMR}$  (400 MHz,  $\text{CDCl}_3$ )  $\delta$  5.07 (1H, t,  $J = 7.1$  Hz), 4.44 – 4.35 (1H, m), 4.22 – 4.13 (1H, m), 2.04 – 1.92 (2H, m), 1.83 – 1.75 (1H, m), 1.68 (3H, s), 1.64 – 1.61 (1H, m), 1.59 (3H, s), 1.57 – 1.49 (1H, m), 1.39 – 1.30 (1H, m), 1.24 – 1.15 (1H, m), 0.93 (3H, d,  $J = 1.8$  Hz);  $^{19}\text{F NMR}$  (471 MHz,  $\text{CDCl}_3$ )  $\delta$  -78.6;  $^{13}\text{C NMR}$  (101 MHz,  $\text{CDCl}_3$ )  $\delta$  131.8, 124.3, 123.0 (q,  $J_{\text{C-F}} = 340.1$  Hz), 67.7, 36.9, 36.7, 29.0, 25.8, 25.4, 19.3, 17.7;

**Isomer 2:**  $^1\text{H NMR}$  (400 MHz,  $\text{CDCl}_3$ )  $\delta$  5.07 (1H, t,  $J = 7.1$  Hz), 4.44 – 4.35 (1H, m), 4.22 – 4.13 (1H, m), 2.04 – 1.92 (2H, m), 1.83 – 1.75 (1H, m), 1.68 (3H, s), 1.64 – 1.61 (1H, m), 1.59 (3H, s), 1.57 – 1.49 (1H, m), 1.39 – 1.30 (1H, m), 1.24 – 1.15 (1H, m), 0.91 (3H, d,  $J = 1.8$  Hz);  $^{19}\text{F NMR}$  (471 MHz,  $\text{CDCl}_3$ )  $\delta$  -78.7;  $^{13}\text{C NMR}$  (101 MHz,  $\text{CDCl}_3$ )  $\delta$  131.8, 124.3, 123.0 (q,  $J_{\text{C-F}} = 340.1$  Hz), 67.6, 36.8, 36.6, 29.0, 25.8, 25.4, 19.2, 17.7. Spectra were consistent with literature data<sup>15</sup>.

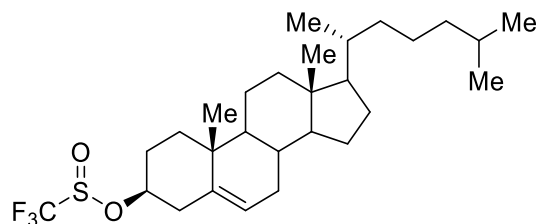

**(10R,13R)-10,13-dimethyl-17-((R)-6-methylheptan-2-yl)-2,3,4,7,8,9,10,11,12,13,14,15,16,17-tetradecahydro-1H-cyclopenta[a]phenanthren-3-yl trifluoromethanesulfinate 9d:** Prepared according to **General Method C** (Eluent: 100:1 to 50:1 petroleum ether: ethyl acetate) and the title compound was isolated as a colorless oil (141.7 mg, 0.282 mmol, 94.0% yield, dr = 1: 1).

**Isomer 1:**  $^1\text{H NMR}$  (400 MHz,  $\text{CDCl}_3$ )  $\delta$  5.41 (1H, t,  $J = 4.7$  Hz), 4.40 – 4.32 (1H, m), 2.62 – 2.38 (2H, m), 2.03 – 1.79 (6H, m), 1.63 – 1.43 (6H, m), 1.37 – 1.25 (4H, m), 1.20 – 1.05 (7H, m), 1.03 (3H, s), 1.00 – 0.94 (3H, m), 0.91 (3H, d,  $J = 6.6$  Hz), 0.87 (3H, d,  $J = 1.7$  Hz), 0.85 (3H, d,  $J = 1.7$  Hz), 0.67 (3H, s);  $^{19}\text{F NMR}$  (471 MHz,  $\text{CDCl}_3$ )  $\delta$  -80.0;  $^{13}\text{C NMR}$  (101 MHz,  $\text{CDCl}_3$ )  $\delta$  138.7, 124.0, 122.8 (q,  $J_{\text{C-F}} = 337.2$  Hz), 83.2, 56.7, 56.3, 50.0, 42.4, 39.9, 39.8, 39.6, 37.1, 36.5, 36.3, 35.9, 32.0, 29.7, 28.3, 28.1, 27.0, 24.4, 24.0, 22.9, 22.7, 21.2, 19.3, 18.8, 11.9;

**Isomer 2:**  $^1\text{H NMR}$  (400 MHz,  $\text{CDCl}_3$ )  $\delta$  5.41 (1H, t,  $J = 4.7$  Hz), 4.40 – 4.32 (1H, m), 2.62 – 2.38 (2H, m), 2.03 – 1.78 (6H, m), 1.63 – 1.42 (6H, m), 1.37 – 1.25 (4H, m), 1.20 – 1.05 (7H, m), 1.03 (3H, s), 1.00 – 0.94 (3H, m), 0.91 (3H, d,  $J = 6.6$  Hz), 0.87 (3H, d,  $J = 1.7$  Hz), 0.85 (3H, d,  $J = 1.7$  Hz), 0.67 (3H, s);  $^{19}\text{F NMR}$  (471 MHz,  $\text{CDCl}_3$ )  $\delta$  -80.1;  $^{13}\text{C NMR}$  (101 MHz,  $\text{CDCl}_3$ )  $\delta$  138.6, 124.0, 122.8 (q,  $J_{\text{C-F}} = 337.2$  Hz), 83.1, 56.7, 56.3, 50.0, 42.4, 39.9, 39.8, 39.6, 37.0, 36.5, 36.3, 35.9, 31.9, 29.5, 28.3, 28.1, 27.0, 24.4, 24.0, 22.9, 22.7, 21.2, 19.3, 18.8, 11.9. Spectra were consistent with literature data<sup>8</sup>.

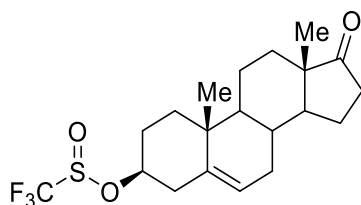

**(10R,13S)-10,13-Dimethyl-17-oxo-2,3,4,7,8,9,10,11,12,13,14,15,16,17-tetradecahydro-1H-cyclopenta[a]phenanthren-3-yl trifluoromethanesulfinate 9e:** Prepared according to **General Method C** (Eluent: 100:1 to 10:1 petroleum ether: ethyl acetate) and the title

compound was isolated as a white solid (108.0 mg, 0.267 mmol, 89.0% yield, dr = 1:1). **M.p.** = 114.8 – 115.3 °C; **IR** (thin film) 2935 (w), 1732 (m), 1190 (s), 1130 (s), 927 (m), 883 (m), 853 (m), 803 (s), 635 (w) cm<sup>-1</sup>; **HRMS** (ESI) m/z: [M+H]<sup>+</sup> Calcd for C<sub>20</sub>H<sub>28</sub>F<sub>3</sub>O<sub>3</sub>S 405.1706; Found 405.1700.

**Isomer 1:** <sup>1</sup>H NMR (400 MHz, CDCl<sub>3</sub>) δ 5.43 (1H, t, *J* = 4.5 Hz), 4.40 – 4.31 (1H, m), 2.61 – 2.41 (3H, m), 2.16 – 1.76 (7H, m), 1.67 – 1.59 (3H, m), 1.56 – 1.42 (2H, m), 1.30 – 1.23 (2H, m), 1.17 – 1.09 (1H, m), 1.04 (3H, s), 1.02 – 0.93 (1H, m), 0.86 (3H, s); <sup>19</sup>F NMR (471 MHz, CDCl<sub>3</sub>) δ -79.9; <sup>13</sup>C NMR (101 MHz, CDCl<sub>3</sub>) δ 138.9, 123.2, 122.8 (q, *J*<sub>C-F</sub> = 338.3 Hz), 82.8, 51.7, 50.1, 47.6, 39.8, 37.0, 36.6, 36.6, 35.9, 31.4, 31.4, 30.8, 29.5, 21.9, 20.4, 19.3, 13.6;

**Isomer 2:** <sup>1</sup>H NMR (500 MHz, CDCl<sub>3</sub>) δ 5.43 (1H, t, *J* = 4.5 Hz), 4.40 – 4.31 (1H, m), 2.61 – 2.41 (3H, m), 2.16 – 1.76 (7H, m), 1.67 – 1.59 (3H, m), 1.56 – 1.42 (2H, m), 1.30 – 1.23 (2H, m), 1.17 – 1.09 (1H, m), 1.04 (3H, s), 1.02 – 0.93 (1H, m), 0.86 (3H, s); <sup>19</sup>F NMR (471 MHz, CDCl<sub>3</sub>) δ -80.0; <sup>13</sup>C NMR (101 MHz, CDCl<sub>3</sub>) δ 138.9, 123.2, 122.8 (q, *J*<sub>C-F</sub> = 338.3 Hz), 82.7, 51.7, 50.1, 47.6, 39.7, 36.9, 36.6, 36.6, 35.9, 31.4, 31.4, 30.8, 29.4, 21.9, 20.4, 19.3, 13.6.

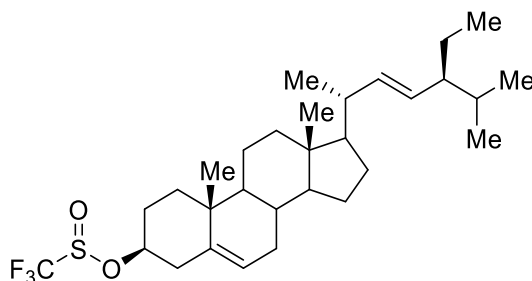

**(10*R*,13*R*)-17-((2*R*,5*S*,*E*)-5-Ethyl-6-methylhept-3-en-2-yl)-10,13-dimethyl-2,3,4,7,8,9,10,11,12,13,14,15,16,17-tetradecahydro-1*H*-cyclopenta[*a*]phenanthren-3-yl trifluoromethanesulfinate 9f:** Prepared according to **General Method C** (Eluent: 100:1 to 20:1 petroleum ether: ethyl acetate) and the title compound was isolated as a white solid (153.2 mg, 0.290 mmol, 96.6% yield, dr = 1:1). **M.p.** = 102.7 – 103.4 °C; **IR** (thin film) 2935 (w), 1464 (w), 1200 (s), 1131 (s), 971 (s), 910 (m), 856 (m), 791 (m) cm<sup>-1</sup>; **MS** (FI): m/z (%) 528. **HRMS** (FI) Calcd for C<sub>30</sub>H<sub>47</sub>F<sub>3</sub>O<sub>2</sub>S 528.3250; Found 528.3243.

**Isomer 1:** <sup>1</sup>H NMR (400 MHz, CDCl<sub>3</sub>) δ 5.42 (1H, t, *J* = 4.7 Hz), 5.17 – 4.98 (2H, m), 4.41 – 4.32 (1H, m), 2.62 – 2.38 (2H, m), 2.08 – 1.81 (6H, m), 1.74 – 1.66 (1H, m), 1.59 –

1.37 (9H, m), 1.22 – 1.06 (5H, m), 1.02 (6H, d,  $J = 7.7$  Hz), 1.00 – 0.88 (2H, m), 0.84 (3H, d,  $J = 6.4$  Hz), 0.80 (6H, dd,  $J = 7.4, 6.8$  Hz), 0.70 (3H, s);  $^{19}\text{F}$  NMR (471 MHz,  $\text{CDCl}_3$ )  $\delta$  –80.0;  $^{13}\text{C}$  NMR (101 MHz,  $\text{CDCl}_3$ )  $\delta$  138.7, 138.4, 124.0, 122.8 (q,  $J_{\text{C-F}} = 337.2$  Hz), 83.2, 56.9, 56.0, 51.4, 50.1, 42.3, 40.7, 39.9, 39.7, 37.1, 36.6, 32.0, 32.0, 31.9, 29.9, 29.7, 29.0, 25.6, 24.5, 21.4, 21.2, 21.2, 19.3, 19.1, 12.4, 12.2;

**Isomer 2:**  $^1\text{H}$  NMR (500 MHz,  $\text{CDCl}_3$ )  $\delta$  5.42 (1H, t,  $J = 4.7$  Hz), 5.17 – 4.98 (2H, m), 4.41 – 4.32 (1H, m), 2.62 – 2.38 (2H, m), 2.08 – 1.81 (6H, m), 1.74 – 1.66 (1H, m), 1.59 – 1.37 (9H, m), 1.22 – 1.06 (5H, m), 1.02 (6H, d,  $J = 7.7$  Hz), 1.00 – 0.88 (2H, m), 0.84 (3H, d,  $J = 6.4$  Hz), 0.80 (6H, dd,  $J = 7.4, 6.8$  Hz), 0.70 (3H, s);  $^{19}\text{F}$  NMR (471 MHz,  $\text{CDCl}_3$ )  $\delta$  –80.0;  $^{13}\text{C}$  NMR (101 MHz,  $\text{CDCl}_3$ )  $\delta$  138.7, 138.4, 124.0, 122.8 (q,  $J_{\text{C-F}} = 337.2$  Hz), 83.1, 56.9, 56.0, 51.4, 50.1, 42.3, 40.7, 39.8, 39.7, 37.1, 36.5, 32.0, 32.0, 31.9, 29.9, 29.6, 29.0, 25.6, 24.5, 21.4, 21.2, 21.2, 19.3, 19.1, 12.4, 12.2.

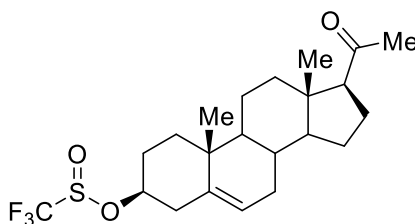

**(10R,13S,17S)-17-Acetyl-10,13-dimethyl-2,3,4,7,8,9,10,11,12,13,14,15,16,17-tetradecahydro-1H-cyclopenta[*a*]phenanthren-3-yl trifluoromethanesulfinate 9g:**

Prepared according to **General Method D** (Eluent: 100:1 to 10:1 petroleum ether: ethyl acetate) and the title compound was isolated as a white solid (106.2 mg, 0.246 mmol, 81.8% yield, dr = 1:1). **M.p.** = 88.1 – 88.9 °C; **IR** (thin film) 2945 (w), 1698 (m), 1361 (w), 1192 (s), 1126 (s), 930 (m), 852 (m), 801 (m)  $\text{cm}^{-1}$ ; **HRMS** (ESI)  $m/z$ :  $[\text{M}+\text{H}]^+$  Calcd for  $\text{C}_{22}\text{H}_{32}\text{F}_3\text{O}_3\text{S}$  433.2019; Found 433.2021.

**Isomer 1:**  $^1\text{H}$  NMR (400 MHz,  $\text{CDCl}_3$ )  $\delta$  5.38 (1H, s), 4.38 – 4.30 (1H, m), 2.58 – 2.47 (2H, m), 2.45 – 2.36 (1H, m), 2.20 – 2.13 (1H, m), 2.08 (3H, s), 2.03 – 1.78 (5H, m), 1.69 – 1.38 (7H, m), 1.33 – 1.08 (4H, m), 0.99 (3H, s), 0.59 (3H, s);  $^{19}\text{F}$  NMR (471 MHz,  $\text{CDCl}_3$ )  $\delta$  –80.0 (3F, d,  $J = 3.6$  Hz);  $^{13}\text{C}$  NMR (101 MHz,  $\text{CDCl}_3$ )  $\delta$  209.5, 138.6, 123.7, 122.7 (q,  $J_{\text{C-F}} = 337.7$  Hz), 82.9, 63.6, 56.8, 49.8, 44.0, 39.8, 38.7, 37.0, 36.5, 36.4, 31.8, 31.6, 29.5, 24.5, 22.8, 21.1, 19.2, 13.2;

**Isomer 2:**  $^1\text{H NMR}$  (500 MHz,  $\text{CDCl}_3$ )  $\delta$  5.38 (1H, s), 4.38 – 4.30 (1H, m), 2.58 – 2.47 (2H, m), 2.45 – 2.36 (1H, m), 2.20 – 2.13 (1H, m), 2.08 (3H, s), 2.03 – 1.78 (5H, m), 1.69 – 1.38 (7H, m), 1.33 – 1.08 (4H, m), 0.99 (3H, s), 0.59 (3H, s);  $^{19}\text{F NMR}$  (471 MHz,  $\text{CDCl}_3$ )  $\delta$  –80.1 (3F, d,  $J = 3.7$  Hz);  $^{13}\text{C NMR}$  (101 MHz,  $\text{CDCl}_3$ )  $\delta$  209.5, 138.6, 123.6, 122.7 (q,  $J_{\text{C-F}} = 337.7$  Hz), 82.8, 63.6, 56.8, 49.8, 44.0, 39.6, 38.7, 36.9, 36.5, 36.4, 31.8, 31.6, 29.4, 24.5, 22.8, 21.1, 19.2, 13.2.

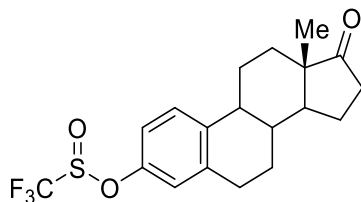

**(13S)-13-methyl-17-oxo-7,8,9,11,12,13,14,15,16,17-decahydro-6H**

**cyclopenta[a]phenanthren-3-yl trifluoromethanesulfinate 9h:** Prepared according to **General Method D** (Eluent: 100:1 to 10:1 petroleum ether: ethyl acetate) and the title compound was isolated as a white solid (171.4 mg, 0.444 mmol, 88.7% yield, dr > 20:1).

**M.p.** = 116.7 – 117.5 °C; **IR** (thin film) 3448 (m), 2957 (w), 2828 (m), 2716 (w), 1603 (s), 1364 (s), 1070 (w), 770 (s)  $\text{cm}^{-1}$ ;  $^1\text{H NMR}$  (400 MHz,  $\text{CDCl}_3$ )  $\delta$  7.30 (1H, d,  $J = 8.5$  Hz), 7.00 – 6.90 (2H, m), 2.91 (2H, dd,  $J = 8.8, 4.1$  Hz), 2.50 (1H, dd,  $J = 19.0, 8.9$  Hz), 2.44 – 2.36 (1H, m), 2.29 – 2.24 (1H, m), 2.19 – 2.01 (3H, m), 1.98 – 1.94 (1H, m), 1.66 – 1.42 (6H, m), 0.91 (3H, s);  $^{19}\text{F NMR}$  (471 MHz,  $\text{CDCl}_3$ )  $\delta$  –80.4;  $^{13}\text{C NMR}$  (101 MHz,  $\text{CDCl}_3$ )  $\delta$  220.7, 149.9, 139.3, 139.1, 127.4, 122.7 (q,  $J_{\text{C-F}} = 337.0$  Hz), 120.8, 117.9, 50.4, 47.9, 44.1, 37.9, 35.9, 31.5, 29.4, 26.2, 25.8, 21.6, 13.8; **HRMS** (ESI)  $m/z$ :  $[\text{M}+\text{Na}]^+$  Calcd for  $\text{C}_{19}\text{H}_{21}\text{F}_3\text{O}_3\text{SNa}$  409.1056; Found 409.1057.

**IV. Synthesis of trifluoromethanesulfinamide 11**

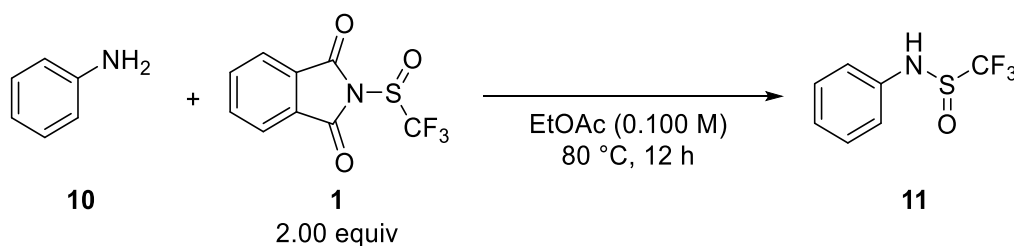



A 120 °C oven-dried 25-mL glass schlenck, equipped with a stir bar, was charged with 2-((trifluoromethyl)sulfinyl)isoindoline-1,3-dione **1** (263.2 mg, 1.00 mmol, 2.00 equiv). The mixture was evacuated and backfilled with nitrogen for three times. Then dry EtOAc (5.00 mL, 0.100 M), aniline (0.500 mmol, 1.00 equiv) was added under N<sub>2</sub> atmosphere. The mixture was allowed to stir for 12 h at 80 °C. The solvent was removed by rotary evaporation and the residue was purified by flash silica gel chromatography. (Eluent: 100:1 to 10:1 petroleum ether: ethyl acetate) and the title compound was isolated as a white solid (69.0 mg, 0.330 mmol, 66.0% yield).

<sup>1</sup>H NMR (400 MHz, CDCl<sub>3</sub>) δ 7.35 (2H, dd, *J* = 7.7, 8.1 Hz), 7.18 (1H, dd, *J* = 7.4, 7.5 Hz), 7.10 (2H, dd, *J* = 7.6 Hz), 6.80 (1H, s); <sup>19</sup>F NMR (471 MHz, CDCl<sub>3</sub>) δ -77.8; <sup>13</sup>C NMR (101 MHz, CDCl<sub>3</sub>) δ 138.1, 130.0, 125.7, 120.5, 123.7 (q, *J*<sub>C-F</sub> = 334.6 Hz). Spectra were consistent with literature data <sup>16</sup>.

## V. Scale-up reaction and sustainable utilization of phthalimide

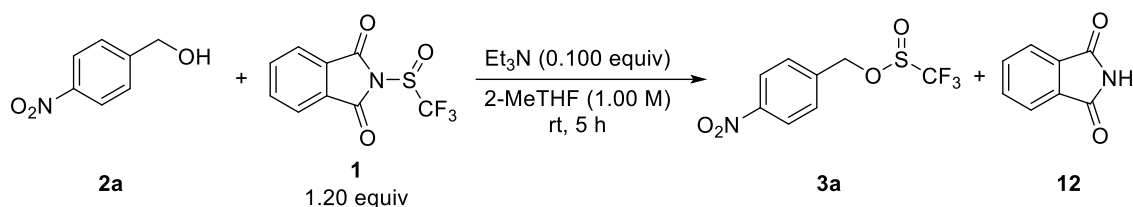

A 120 °C oven-dried 100-mL round bottom flask, equipped with a stir bar, was charged with 2-((trifluoromethyl)sulfinyl)isoindoline-1,3-dione (6.00 mmol, 1.20 equiv, 1.58 g). The mixture was evacuated and backfilled with nitrogen for three times. Then dry 2-MeTHF (50.0 mL, 0.100 M), (4-nitrophenyl)methanol (5.00 mmol, 1.00 equiv, 0.766 g) and Et<sub>3</sub>N (0.500 mmol, 0.100 equiv, 50.6 mg) were added under N<sub>2</sub> atmosphere. The mixture was allowed to stir for 5 h at room temperature. The solvent was removed by rotary evaporation and petroleum ether (100 mL) was added to the mixture. The residue was filtered to give **12** (117.0 mg, 4.35 mmol, 86.9% yield) as a white solid and the solvent was removed by rotary evaporation to give **3a** (898 mg, 6.10 mmol, >99% yield) as a colorless

liquid.

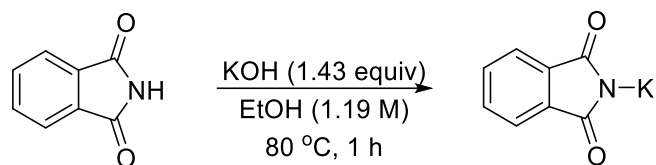

A 120 °C oven-dried 250-mL round bottom flask, equipped with a stir bar, was charged with KOH (169.7 mmol, 1.43 equiv, 9.52 g). The mixture was evacuated and backfilled with nitrogen for three times. Then dry EtOH (100 mL, 1.19 M) was added under N<sub>2</sub> atmosphere. When the solid completely dissolved, the isoindolin-1,3-dione (119 mmol, 1.00 equiv, 17.5 g) was added under N<sub>2</sub> atmosphere. The mixture was allowed to stir for 1 h at 80 °C. Cooled the mixture to room temperature. Filtered the mixture and washed the solid by absolute EtOH. Dry the mixture to give a white solid (21.7 g, 117 mmol, 98.4% yield). Spectra were consistent with literature data<sup>17</sup>.

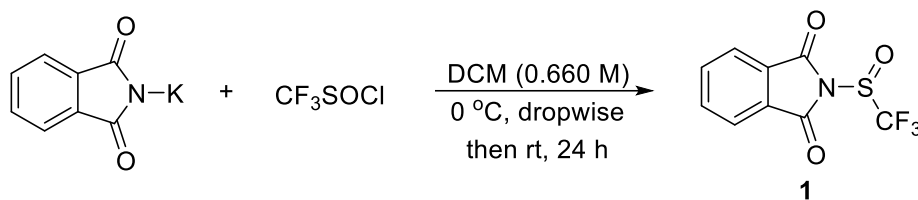

A 120 °C oven-dried 200-mL glass, equipped with a stir bar, was charged with potassium phthalimide (6.11 g, 33.0 mmol, 1.00 equiv). The mixture was evacuated and backfilled with nitrogen for three times. Then dry DCM (45.0 mL) was added under N<sub>2</sub> atmosphere. The mixture was cooled to 0 °C. A solution of trifluoromethanesulfinyl chloride (5.00 g, 33.0 mmol, 1.00 equiv) in DCM (5.00 mL) was added dropwise under N<sub>2</sub> atmosphere. Then the mixture was slowly warmed up to room temperature and stirred at room temperature for 24 h. The reaction mixture was filtered through a short pad of Celite and concentrated in vacuo. By repeated recrystallization from toluene at -20 °C. The product was white solid (4.01 g, 15.2 mmol, 46.2% yield). Spectra were consistent with literature data<sup>1</sup>.

## VI. Mechanistic studies

### 1. Control experiments: the effect of hydroxy group (-OH)

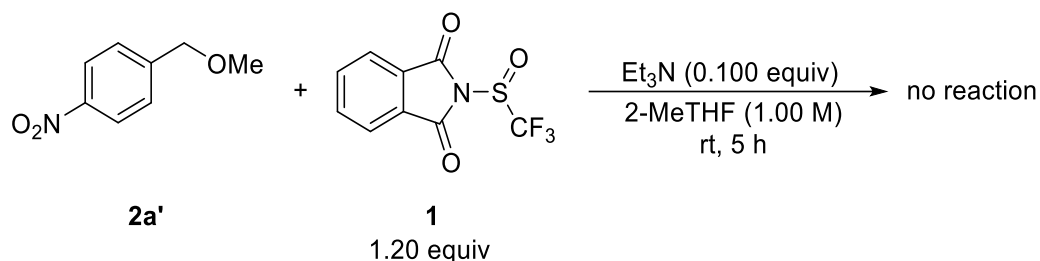

A 120 °C oven-dried 25-mL glass schlenck, equipped with a stir bar, was charged with 2-((trifluoromethyl)sulfinyl)isoindoline-1,3-dione **1** (31.6 mg, 0.120 mmol, 1.20 equiv). The mixture was evacuated and backfilled with nitrogen for three times. Then dry 2-MeTHF (1.00 mL, 0.100 M), 1-(methoxymethyl)-4-nitrobenzene **2a'** (16.7 mg, 0.100 mmol, 1.00 equiv) and  $\text{Et}_3\text{N}$  (1.00 mg, 0.0100 mmol, 0.100 equiv) was added under  $\text{N}_2$  atmosphere. The mixture was allowed to stir for 5 h at room temperature, then the reaction was monitored by TLC (5:1 petroleum etherhexanes: ethyl acetate), and no reaction occurred. The solvent was removed by rotary evaporation, the crude mixture was subjected to  $^1\text{H}$  NMR spectroscopy in the presence of  $\text{CH}_2\text{Br}_2$  (17.4 mg, 0.100 mmol).

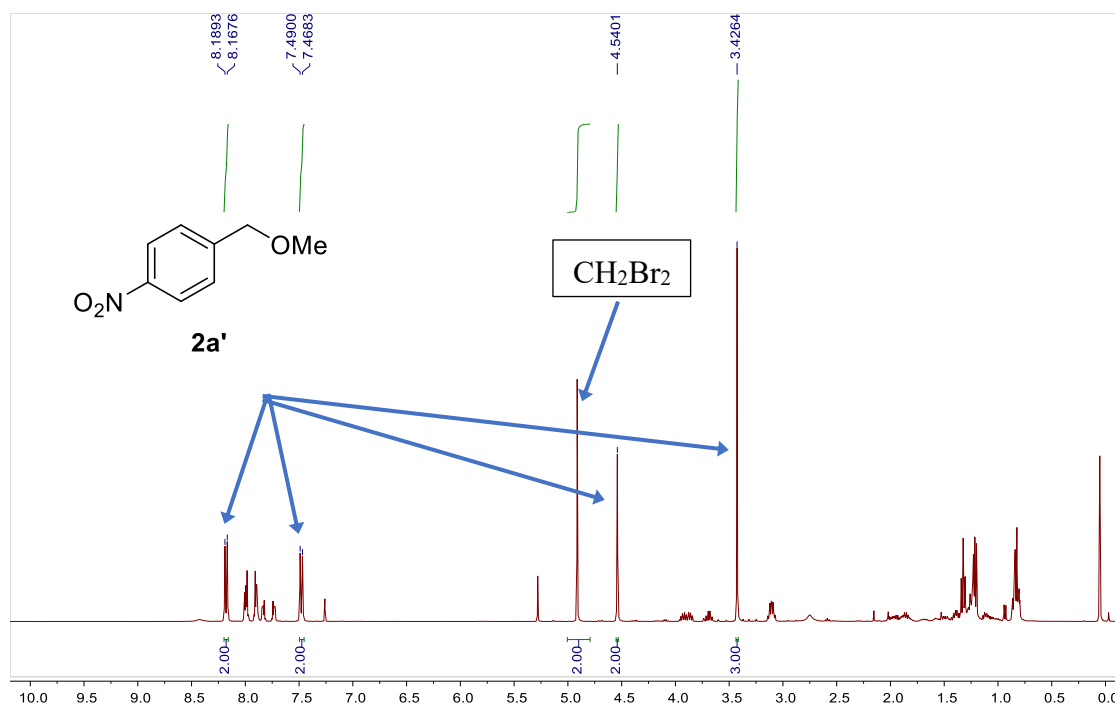

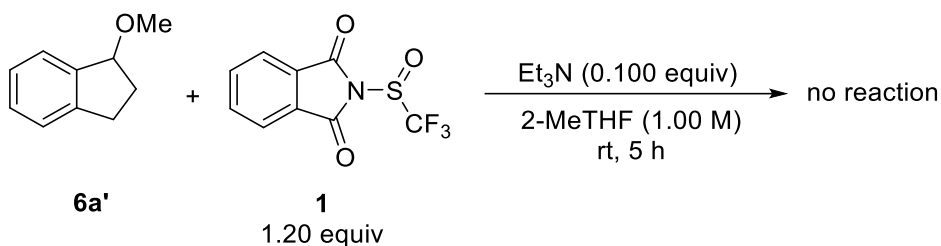

A 120 °C oven-dried 25-mL glass schlenck, equipped with a stir bar, was charged with 2-((trifluoromethyl)sulfinyl)isoindoline-1,3-dione **1** (31.6 mg, 0.120 mmol, 1.20 equiv). The mixture was evacuated and backfilled with nitrogen for three times. Then dry 2-MeTHF (1.00 mL, 0.100 M), 1-methoxy-2,3-dihydro-1*H*-indene **6a'** (14.8 mg, 0.100 mmol, 1.00 equiv) and Et<sub>3</sub>N (1.00 mg, 0.0100 mmol, 0.100 equiv) was added under N<sub>2</sub> atmosphere. The mixture was allowed to stir for 5 h at room temperature, then the reaction was monitored by TLC (5:1 petroleum etherhexanes: ethyl acetate), and no reaction occurred. The solvent was removed by rotary evaporation, the crude mixture was subjected to <sup>1</sup>H NMR spectroscopy in the presence of CH<sub>2</sub>Br<sub>2</sub> (17.4 mg, 0.100 mmol).

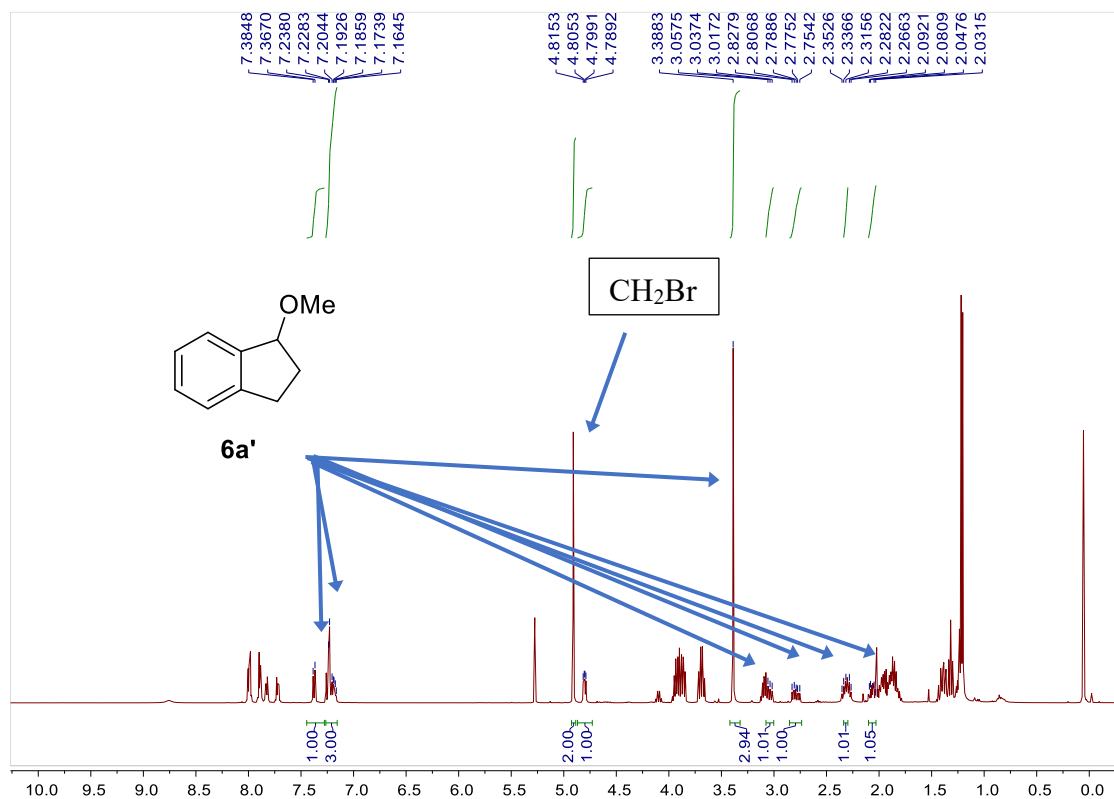

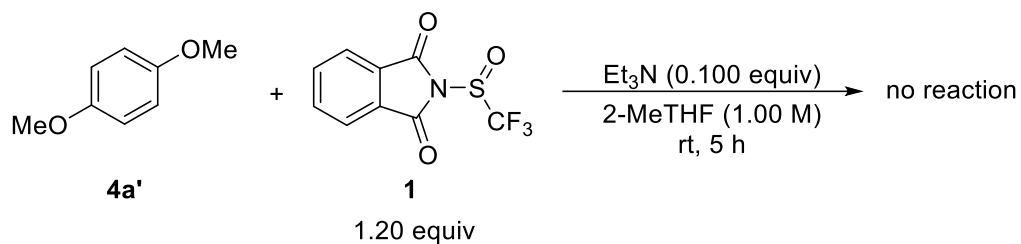

A 120 °C oven-dried 25-mL glass schlenck, equipped with a stir bar, was charged with 2-((trifluoromethyl)sulfinyl)isoindoline-1,3-dione **1** (31.6 mg, 0.120 mmol, 1.20 equiv). The mixture was evacuated and backfilled with nitrogen for three times. Then dry 2-MeTHF (1.00 mL, 0.100 M), 1,4-dimethoxybenzene **4a'** (13.8 mg, 0.100 mmol, 1.00 equiv) and Et<sub>3</sub>N (1.00 mg, 0.0100 mmol, 0.100 equiv) was added under N<sub>2</sub> atmosphere. The mixture was allowed to stir for 5 h at room temperature, then the reaction was monitored by TLC (5:1 petroleum etherhexanes: ethyl acetate), and no desired product was formed according to TLC. The solvent was removed by rotary evaporation, the crude mixture was subjected to <sup>1</sup>H NMR spectroscopy in the presence of CH<sub>2</sub>Br<sub>2</sub> (17.4 mg, 0.100 mmol).

## 2. Radical trapping experiment: addition of radical scavenger

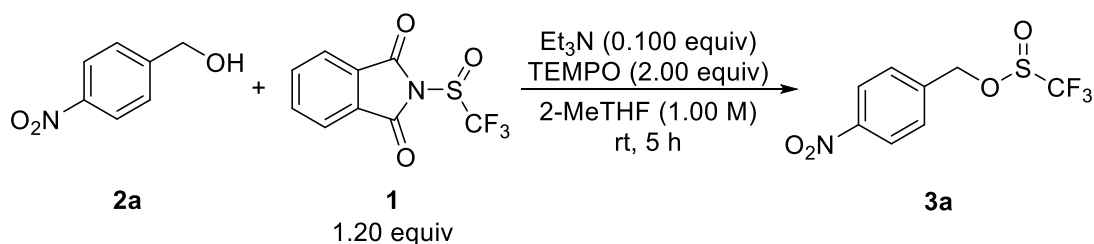

A 120 °C oven-dried 25-mL glass schlenck, equipped with a stir bar, was charged with 4-nitrobenzyl alcohol **2a** (15.3 mg, 0.100 mmol, 1.00 equiv), TEMPO (31.2 mg, 0.200 mmol, 2.00 equiv). The mixture was evacuated and backfilled with nitrogen for three times. Then Et<sub>3</sub>N (1.00 mg, 0.0100 mmol, 0.100 equiv) and dry 2-MeTHF (1.00 mL, 0.100 M), was added under N<sub>2</sub> atmosphere. The mixture was allowed to stir for 5 h at room temperature, then the reaction was monitored by TLC (5:1 petroleum etherhexanes: ethyl acetate), and desired product **3a** was formed in >99% yield according to <sup>19</sup>F NMR.

## 3. Evidence on the formation of O-(SO)CF<sub>3</sub> specie

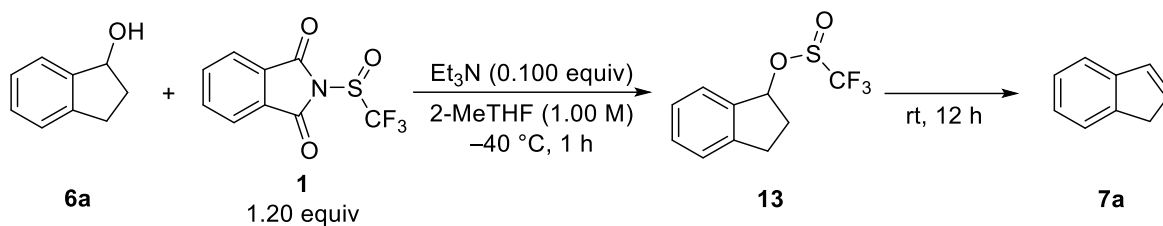

A 120 °C oven-dried 25-mL glass schlenck, equipped with a stir bar, was charged with 2-((trifluoromethyl)sulfinyl)isoindoline-1,3-dione (31.6 mg 0.120 mmol, 1.20 equiv), 2,3-dihydro-1H-inden-1-ol **6a** (13.4 mg, 0.300 mmol, 1.00 equiv). The mixture was evacuated and backfilled with nitrogen for three times. Then dry 2-MeTHF (1.00 mL, 0.100 M) and Et<sub>3</sub>N (1.00 mg, 0.0100 mmol, 0.100 equiv) was added under N<sub>2</sub> atmosphere. The mixture was allowed to stir for 1 h at -40 °C. The crude mixture was subjected to <sup>19</sup>F NMR spectroscopy in the presence of PhCF<sub>3</sub> (14.6 mg, 0.100 mmol). Then the mixture was allowed to stir for 12 h at room temperature, then the crude mixture was subjected to <sup>19</sup>F NMR spectroscopy in the presence of PhCF<sub>3</sub> (14.6 mg, 0.100 mmol).

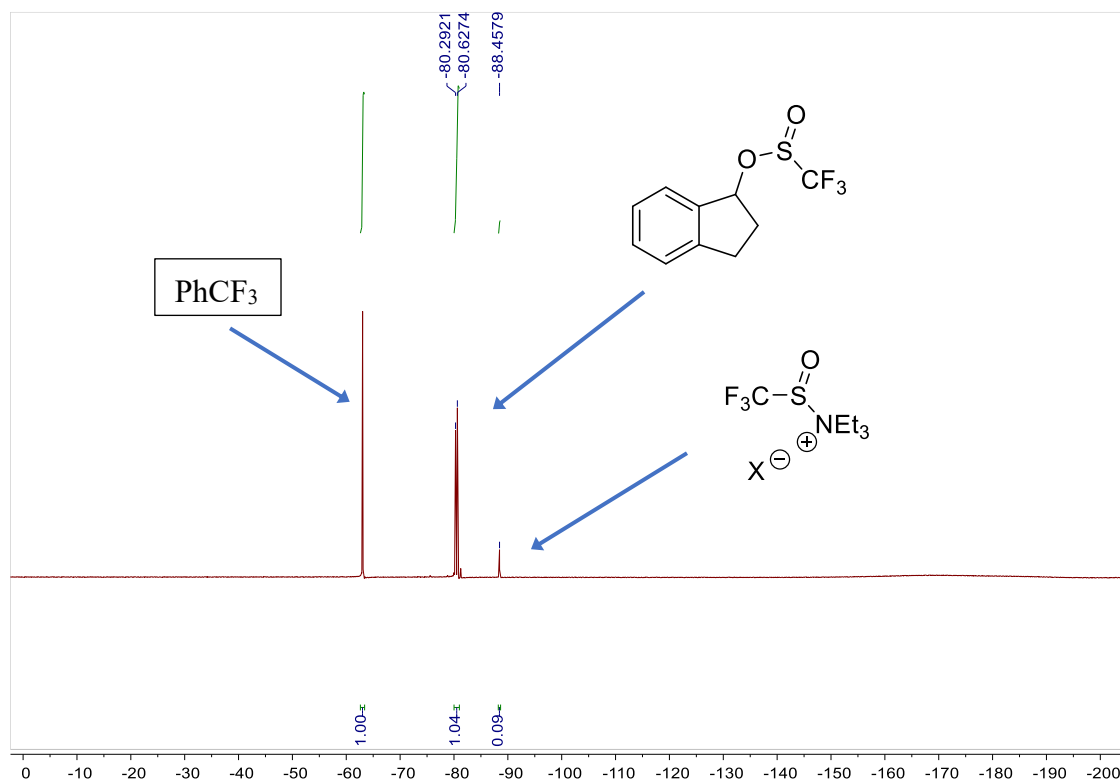

The NMR tube was then placed at room temperature for 12 h:

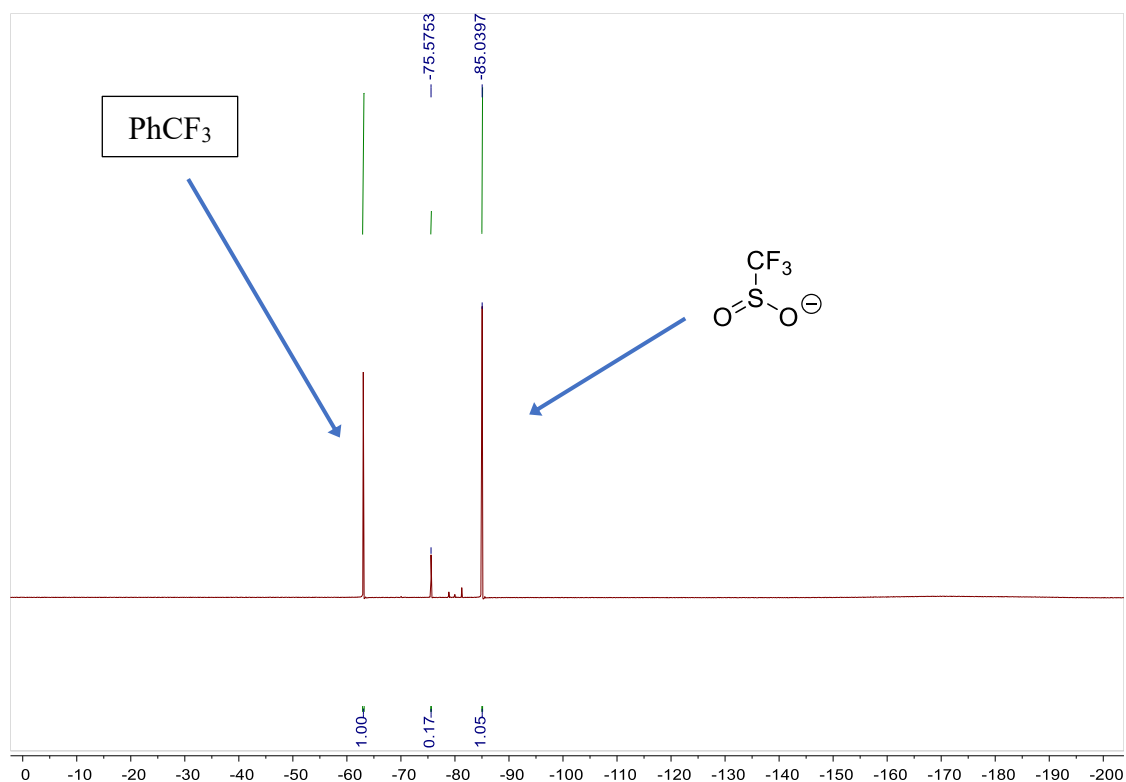

#### 4. Effect of $\text{CF}_3\text{SOCl}$ for $\text{O-S(O)CF}_3$ bond formation of (4-nitrophenyl)methanol

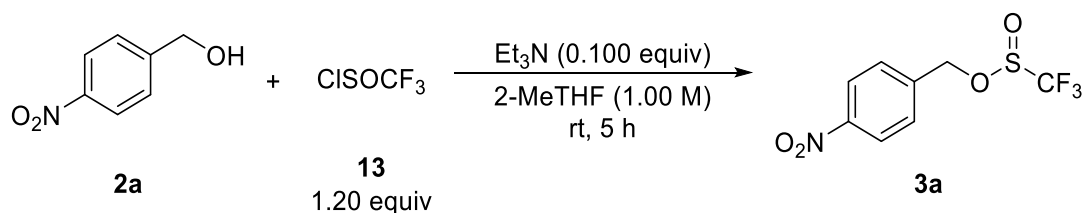

A 120 °C oven-dried 25-mL glass schlenck, equipped with a stir bar, was charged with Trifluoromethanesulfinic chloride (0.600 mmol, 1.20 equiv, 91.5 mg). The mixture was evacuated and backfilled with nitrogen for three times. Then dry 2-MeTHF (5.00 mL, 0.100 M), (4-nitrophenyl)methanol (0.500 mmol, 1.00 equiv, 76.6 mg) and  $\text{Et}_3\text{N}$  (0.0500 mmol, 0.100 equiv, 5.06 mg) were added under  $\text{N}_2$  atmosphere. The mixture was allowed to stir for 5 h at room temperature. The crude mixture was subjected to  $^{19}\text{F}$  NMR spectroscopy in the presence of  $\text{PhCF}_3$  (73.1 mg, 0.500 mmol) as an internal standard. The **3a**  $^{19}\text{F}$  NMR yield was 65% yield.

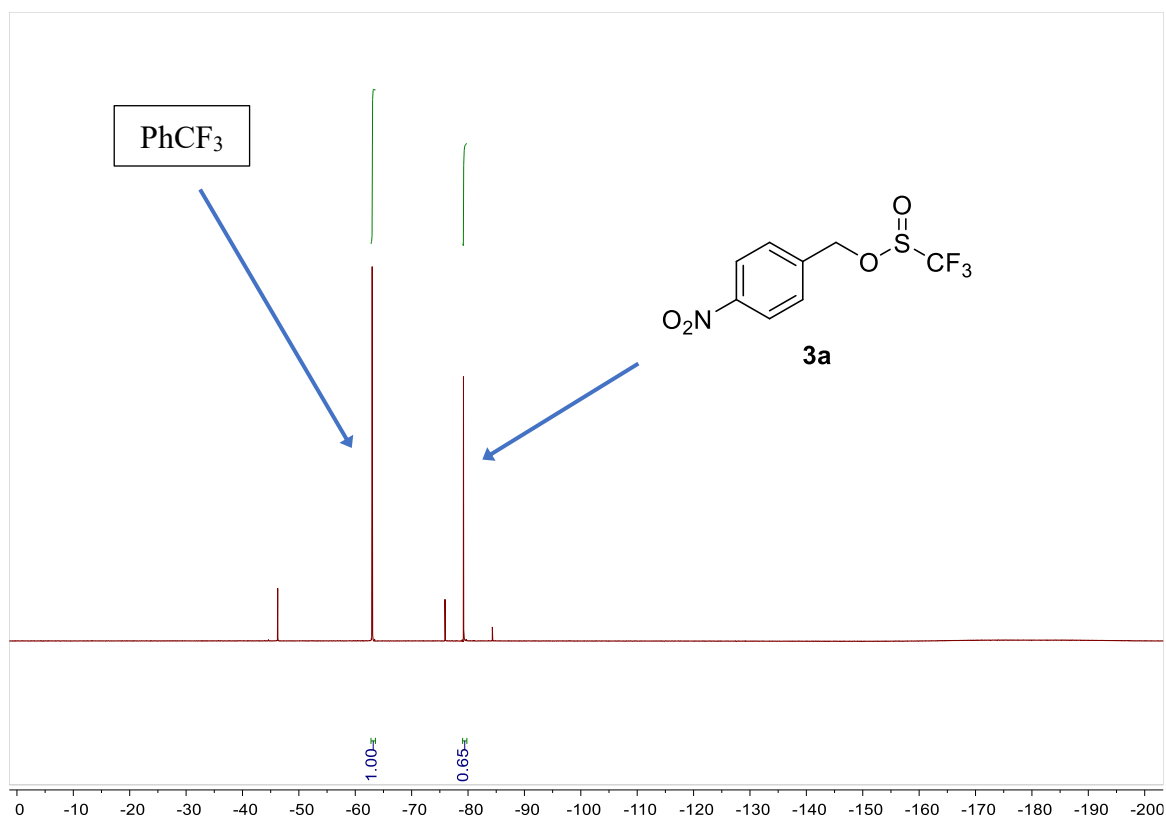

## 5. Effect of $\text{CF}_3\text{SOCl}$ for $\text{O-S(O)CF}_3$ or $\text{SO}_2\text{CF}_3$ bond formation of Allylic Alcohols

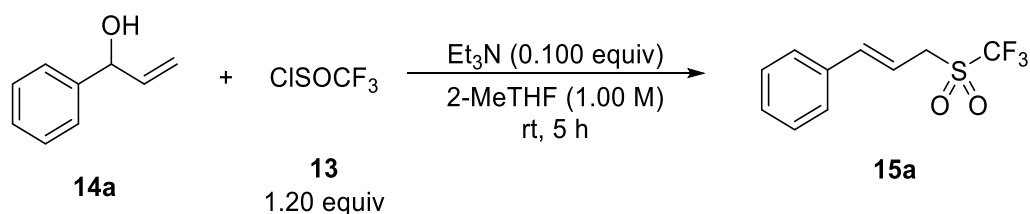

A 120 °C oven-dried 25-mL glass schlenck, equipped with a stir bar, was charged with Trifluoromethanesulfinic chloride (0.600 mmol, 1.20 equiv, 91.5 mg). The mixture was evacuated and backfilled with nitrogen for three times. Then dry 2-MeTHF (5.00 mL, 0.100 M), 1-phenylprop-2-en-1-ol (0.500 mmol, 1.00 equiv, 68.6 mg) and  $\text{Et}_3\text{N}$  (0.0500 mmol, 0.100 equiv, 5.06 mg) were added under  $\text{N}_2$  atmosphere. The mixture was allowed to stir for 5 h at room temperature. The crude mixture was subjected to  $^{19}\text{F}$  NMR spectroscopy in the presence of  $\text{PhCF}_3$  (73.1 mg, 0.500 mmol) as an internal standard. The **15a**  $^{19}\text{F}$  NMR yield was 7% yield.



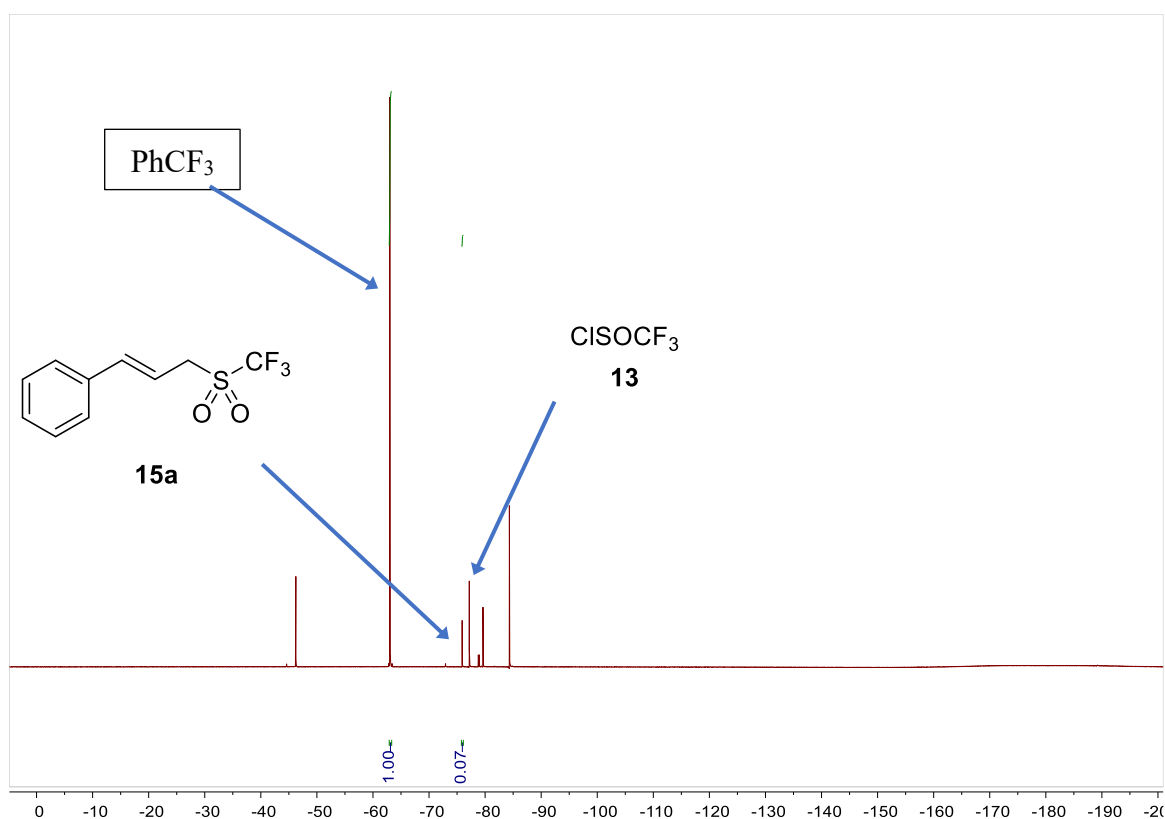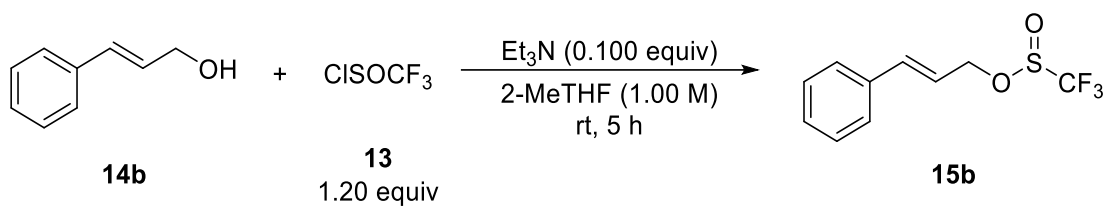

A 120 °C oven-dried 25-mL glass schlenck, equipped with a stir bar, was charged with Trifluoromethanesulfinic chloride (0.600 mmol, 1.20 equiv, 91.5 mg). The mixture was evacuated and backfilled with nitrogen for three times. Then dry 2-MeTHF (5.00 mL, 0.100 M), 3-phenylprop-2-en-1-ol (0.500 mmol, 1.00 equiv, 67.1 mg) and Et<sub>3</sub>N (0.0500 mmol, 0.100 equiv, 5.06 mg) were added under N<sub>2</sub> atmosphere. The mixture was allowed to stir for 5 h at room temperature. The crude mixture was subjected to <sup>19</sup>F NMR spectroscopy in the presence of PhCF<sub>3</sub> (73.1 mg, 0.500 mmol) as an internal standard. The **15b** <sup>19</sup>F NMR yield was 60% yield.

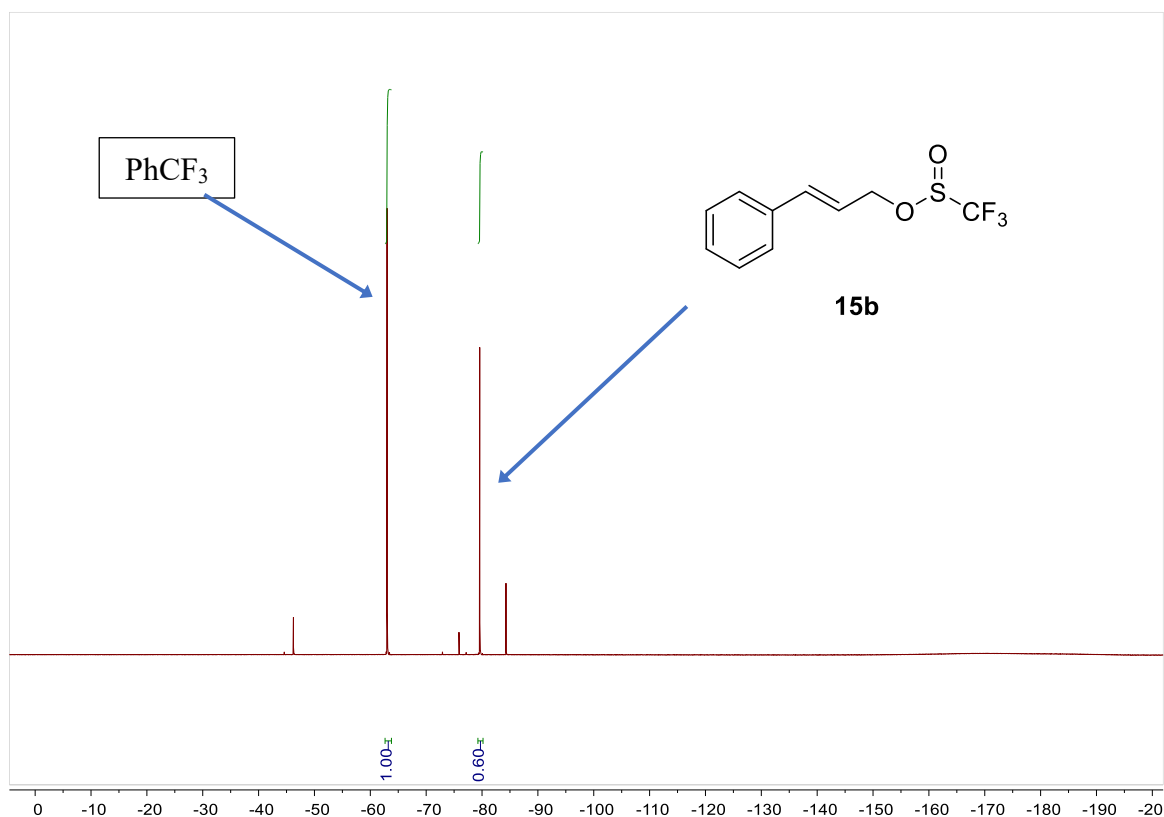

## 6. Effect of $\text{CF}_3\text{SOCl}$ for double bond formation of Allylic Alcohols

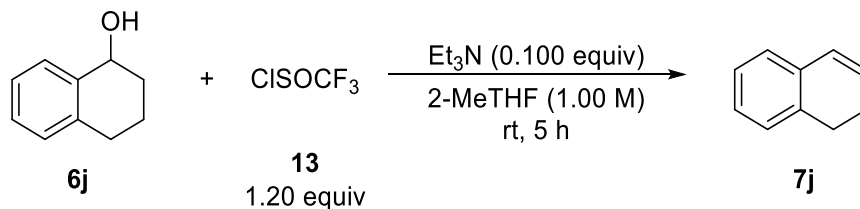

A 120 °C oven-dried 25-mL glass schlenck, equipped with a stir bar, was charged with Trifluoromethanesulfinic chloride (0.600 mmol, 1.20 equiv, 91.5 mg). The mixture was evacuated and backfilled with nitrogen for three times. Then dry 2-MeTHF (5.00 mL, 0.100 M), 1,2,3,4-tetrahydronaphthalen-1-ol (0.500 mmol, 1.00 equiv, 74.1 mg) and  $\text{Et}_3\text{N}$  (0.0500 mmol, 0.100 equiv, 5.06 mg) were added under  $\text{N}_2$  atmosphere. The mixture was allowed to stir for 5 h at room temperature. The crude mixture was added 25.0 mL water, extracted by DCM (25.0 mL $\times$ 3). The combined organic layers were extracted by brine (25.0 mL $\times$ 2), dried over by  $\text{Na}_2\text{SO}_4$  and filtered. The solvent was removed by rotary evaporation. The mixture was subjected to  $^{19}\text{F}$  NMR spectroscopy in the presence of  $\text{CH}_2\text{Br}_2$  (86.9 mg, 0.500 mmol) as an internal standard. The **7j**  $^1\text{H}$  NMR yield was 6% yield.

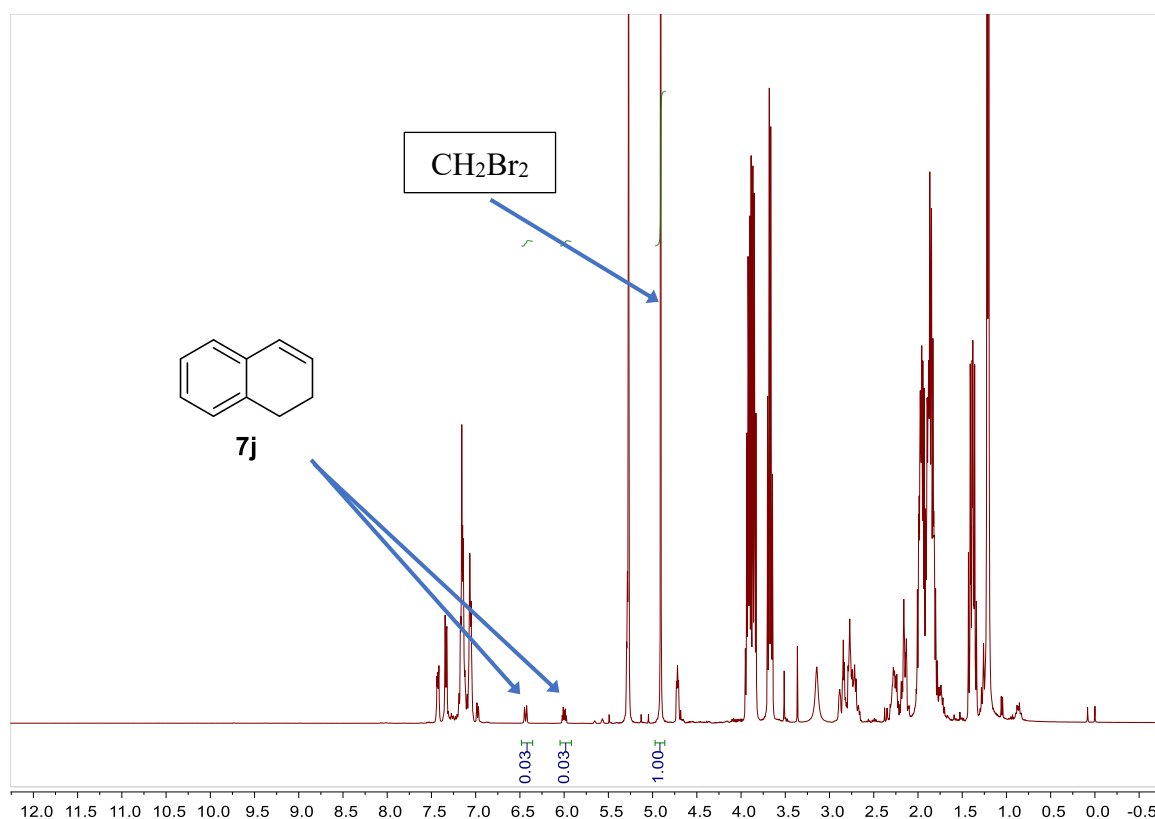

## VII. References

1. S. Xing, C. Ma, W. Liu, S.-F. Ni, D. Zhu, L.-W. Xu and X. Shao, Lewis Base-Catalyzed Trifluoromethylsulfonylation of Allylic Alcohols: Stability-Oriented Divergent Synthesis, *Org. Lett.*, 2023, **25**, 1066-1071
2. C. Andersen, V. Ferey, M. Daumas, P. Bernardelli, A. Guerinot and J. Cossy, Introduction of Cyclopropyl and Cyclobutyl Ring on Alkyl Iodides through Cobalt-Catalyzed Cross-Coupling, *Org. Lett.*, 2019, **21**, 2285-2289.
3. D. G. Brown, P. R. Bernstein, A. Griffin, S. Wesolowski, D. Labrecque, M. C. Tremblay, M. Sylvester, R. Mauger, P. D. Edwards, S. R. Throner, J. J. Folmer, J. Cacciola, C. Scott, L. A. Lazor, M. Pourashraf, V. Santhakumar, W. M. Potts, S. Sydserrff, P. Giguere, C. Levesque, M. Dasser and T. Groblewski, Discovery of Spirofused Piperazine and Diazepane Amides as Selective Histamine-3 Antagonists with in Vivo Efficacy in a Mouse Model of Cognition, *J. Med. Chem.*, 2014, **57**, 733-758.
4. Z. Zhang, B. Górski and D. Leonori, Merging Halogen-Atom Transfer (XAT) and Copper Catalysis for the Modular Suzuki–Miyaura-Type Cross-Coupling of Alkyl Iodides and Organoborons, *J. Am. Chem. Soc.*, 2022, **144**, 1986-1992.
5. J. E. Roque Peña and E. J. Alexanian, Cobalt-Catalyzed Silylcarbonylation of Unactivated Secondary Alkyl Tosylates at Low Pressure, *Org. Lett.*, 2017, **19**, 4413-4415.
6. M. Bakos, A. Gyomere, A. Domjan and T. Soos, Auto-Tandem Catalysis with Frustrated Lewis Pairs for Reductive Etherification of Aldehydes and Ketones, *Angew.*

- Chem. Int. Ed.*, 2017, **56**, 5217-5221.
7. V. S. Ranade, G. Consiglio and R. Prins, Functional-Group-Directed Diastereoselective Hydrogenation of Aromatic Compounds. 21, *J. Org. Chem.*, 2000, **65**, 1132-1138.
  8. Y. Sumii, K. Sasaki, O. Matsubara and N. Shibata, Synthesis of Difluoromethanesulfinate Esters by the Difluoromethanesulfonylation of Alcohols, *Org. Lett.*, 2021, **23**, 2777-2782.
  9. X. M. Chen, M. Tordeux, J. R. Desmurs and C. Wakselman, Thia-Fries Rearrangement of Aryl Triflinates to Trifluoromethanesulfinylphenols, *J. Fluor. Chem.*, 2003, **123**, 51-56.
  10. M. Tobisu, H. Nakai and N. Chatani, Platinum and Ruthenium Chloride-Catalyzed Cycloisomerization of 1-Alkyl-2-ethynylbenzenes: Interception of pi-Activated Alkynes with a Benzylic C-H Bond, *J. Org. Chem.*, 2009, **74**, 5471-5475.
  11. Y. Lu, M. M. Xu, Z. M. Zhang, J. L. Zhang and Q. Cai, Catalytic Asymmetric Inverse-Electron-Demand Diels-Alder Reactions of 2-Pyrones with Indenes: Total Syntheses of Cephanolides A and B, *Angew. Chem. Int. Ed.*, 2021, **60**, 26610-26615.
  12. M. Imai, G. R. Morais, B. al-Hindawi, M. A. M. al-Sulaibi, M. Meetani and T. Thiemann, Acid Catalysed Reaction of Indanones, Tetralones and Benzosuberone with Neopentyl Glycol and Other Alkanediols under Forced Conditions, *J. Chem. Res.*, 2010, DOI: 10.3184/030823410x12753214605445, 325-329.
  13. M. Adamczyk, D. S. Watt and D. A. Netzels, Synthesis of Biological Markers in Fossil fuels. 2. Synthesis and Carbon-13 NMR Studies of Substituted Indans and Tetralins, *J. Org. Chem.*, 1984, **49**, 4226-4237.
  14. D. Inschauspe, J. B. Sortais, T. Billard and B. R. Langlois, Trifluoromethanesulfinic Acid Derivatives as Nucleophilic trifluoromethylating reagents, *Synlett*, 2003, 233-235.
  15. T. Billard, A. Greiner and B. R. Langlois, A new equivalent of the CF<sub>3</sub>S(O)<sup>+</sup> cation. Synthesis of Trifluoromethanesulfinates and Trifluoromethanesulfinamides, *Tetrahedron*, 1999, **55**, 7243-7250.
  16. Z. J. Liu and R. C. Larock, Intermolecular C-N addition of amides and S-N addition of sulfinamides to arynes, *J. Am. Chem. Soc.*, 2005, **127**, 13112-13113.
  17. X. Dong, L. P. Xu, Y. Yang, Y. X. Liu, X. Li, Q. Liu, L. Zheng, F. G. Wang and H. Liu, A palladium/Et<sub>3</sub>N Center Dot HI-catalyzed Highly Selective 7-endo Alkyl-Heck-type Reaction of Epoxides and a DFT Study on the Mechanism, *Org. Chem. Front.*, 2021, **8**, 6009-6018.

## VIII. DFT Calculation

All calculations were performed using Gaussian 16, Revision A.03 package.<sup>1</sup> All of the reactants, intermediates, transition states, products were optimized by the DFT with the M06-2X functional.<sup>2</sup> For geometry optimizations and frequency calculations, we employed 6-31G(d) basis sets for H, C, O, S, F, and N. All the stationary structures were characterized with no imaginary frequency and the transition state structures (TSs) were characterized with a single imaginary frequency. Intrinsic reaction coordinate (IRC) calculations were performed on the TSs. The solvent effect of Tetrahydrofuran was evaluated through the SMD method,<sup>3</sup> in which a better basis system was used. We employed 6-311++G(d,p) basis sets for all atoms. All reported energies are free energies at a concentration of 1 M and a temperature of 298.15 K. Because no standard quantummechanics-based approach is available for accurate prediction of the entropy in solution, we adopted the approximate approach proposed by Martin et al.<sup>4</sup>

---

<sup>1</sup> Gaussian 16, Revision A.03, M. J. Frisch, G. W. Trucks, H. B. Schlegel, G. E. Scuseria, M. A. Robb, J. R. Cheeseman, G. Scalmani, V. Barone, G. A. Petersson, H. Nakatsuji, X. Li, M. Caricato, A. V. Marenich, J. Bloino, B. G. Janesko, R. Gomperts, B. Mennucci, H. P. Hratchian, J. V. Ortiz, A. F. Izmaylov, J. L. Sonnenberg, D. Williams-Young, F. Ding, F. Lipparini, F. Egidi, J. Goings, B. Peng, A. Petrone, T. Henderson, D. Ranasinghe, V. G. Zakrzewski, J. Gao, N. Rega, G. Zheng, W. Liang, M. Hada, M. Ehara, K. Toyota, R. Fukuda, J. Hasegawa, M. Ishida, T. Nakajima, Y. Honda, O. Kitao, H. Nakai, T. Vreven, K. Throssell, J. A. Montgomery, Jr., J. E. Peralta, F. Ogliaro, M. J. Bearpark, J. J. Heyd, E. N. Brothers, K. N. Kudin, V. N. Staroverov, T. A. Keith, R. Kobayashi, J. Normand, K. Raghavachari, A. P. Rendell, J. C. Burant, S. S. Iyengar, J. Tomasi, M. Cossi, J. M. Millam, M. Klene, C. Adamo, R. Cammi, J. W. Ochterski, R. L. Martin, K. Morokuma, O. Farkas, J. B. Foresman, and D. J. Fox, Gaussian, Inc., Wallingford CT, **2016**.

<sup>2</sup> Y. Zhao, D. G. Truhlar, *Theor Chem Account.*, **2008**, *120*, 215.

<sup>3</sup> A. V. Marenich, C. J. Cramer, D. G. Truhlar, *J. Phys. Chem. B.*, **2009**, *113*, 6378.

<sup>4</sup> R. L. Martin, P. J. Hay, L. R. Pratt, *J. Phys. Chem. A*, **1998**, *102*, 3565.

**Cartesian coordinates of the optimized structures:**

**I**

E = -1323.075672 a.u.

0 1

|   |             |             |            |
|---|-------------|-------------|------------|
| C | -2.26669100 | 1.92735400  | 2.79915200 |
| C | -0.88342600 | 1.98492700  | 2.81442900 |
| C | -0.20281300 | 3.19545000  | 2.78331600 |
| C | -0.87167300 | 4.40705800  | 2.73518900 |
| C | -2.26709200 | 4.36175400  | 2.71981100 |
| C | -2.95266400 | 3.14270700  | 2.75121700 |
| H | -2.78437800 | 0.97434200  | 2.82225000 |
| H | -0.32623600 | 5.34436900  | 2.70915100 |
| H | -2.83244900 | 5.28704400  | 2.68156600 |
| H | -4.03763400 | 3.14448100  | 2.73690500 |
| C | 0.10266400  | 0.86635200  | 2.86353200 |
| C | 1.26050200  | 2.92532800  | 2.79846800 |
| N | 1.38056200  | 1.51014800  | 2.89449100 |
| O | -0.09300800 | -0.31434000 | 2.87936500 |
| O | 2.18170300  | 3.69409100  | 2.74242800 |
| S | 2.91853400  | 0.76915000  | 2.63309300 |
| O | 2.78595800  | -0.34979400 | 1.68275700 |
| C | 2.97516300  | 0.00860800  | 4.33258100 |
| F | 4.15511200  | -0.59305700 | 4.44167800 |
| F | 2.90104500  | 0.99005600  | 5.22630700 |
| F | 2.01508900  | -0.86756800 | 4.55003600 |

**P**

E = -347.6004749 a.u.

0 1

|   |             |             |             |
|---|-------------|-------------|-------------|
| C | -5.37058100 | 2.36398400  | -0.04965600 |
| C | -4.82425400 | 1.41002300  | 0.79440300  |
| C | -3.44982900 | 1.41891900  | 1.09077300  |
| C | -2.61272300 | 2.38590900  | 0.54136600  |
| C | -3.16616600 | 3.34372200  | -0.30728700 |
| C | -4.53037300 | 3.33451700  | -0.60073800 |
| H | -6.43226600 | 2.36100500  | -0.28128900 |
| H | -1.55041500 | 2.39603100  | 0.76756500  |
| H | -2.52905600 | 4.10584300  | -0.74535700 |
| H | -4.94207800 | 4.08893900  | -1.26378700 |
| C | -3.17224300 | 0.30041300  | 2.00110700  |
| C | -5.47258100 | 0.26055900  | 1.52532400  |
| H | -6.25422900 | 0.60019400  | 2.21715700  |
| H | -5.94974700 | -0.44882900 | 0.83673800  |

|   |             |             |            |
|---|-------------|-------------|------------|
| C | -4.30974000 | -0.36474300 | 2.25594100 |
| H | -4.40971000 | -1.23481600 | 2.89390700 |
| H | -2.19030900 | 0.06486600  | 2.39588600 |

**TS4-5**

E = -1526.409606 a.u.

0 1

|   |             |             |             |
|---|-------------|-------------|-------------|
| C | 0.71853700  | 2.77299200  | 1.94498400  |
| C | 1.31333500  | 1.77948900  | 2.71431800  |
| C | 2.67010200  | 1.88037000  | 3.06198800  |
| C | 3.43673600  | 2.97871900  | 2.68107900  |
| C | 2.83628900  | 3.96732000  | 1.90754000  |
| C | 1.49088000  | 3.86201700  | 1.54006000  |
| H | -0.33052900 | 2.70966500  | 1.66935500  |
| H | 4.47376600  | 3.06274100  | 2.99169100  |
| H | 3.41167900  | 4.83200100  | 1.59223400  |
| H | 1.03924600  | 4.64568100  | 0.93922100  |
| C | 3.03726400  | 0.68657800  | 3.82931100  |
| O | 3.10342200  | 1.71498900  | 5.69946500  |
| C | 0.74408300  | 0.50675400  | 3.27766600  |
| H | 0.16963000  | 0.73808000  | 4.19081500  |
| H | 0.09625800  | -0.03331200 | 2.57487100  |
| C | 1.99708300  | -0.23665700 | 3.72060600  |
| H | 1.93300000  | -1.09925800 | 4.37906000  |
| H | 2.45388800  | -0.83688300 | 2.42623400  |
| H | 4.04909600  | 0.44525300  | 4.12628300  |
| S | 2.06232900  | 1.33178600  | 6.74723600  |
| O | 0.68316400  | 1.18006000  | 6.18847000  |
| C | 2.55962100  | -0.49752600 | 6.99369200  |
| F | 1.55971900  | -1.34139800 | 6.71144200  |
| F | 3.61705800  | -0.86754100 | 6.24949300  |
| F | 2.89791000  | -0.68830400 | 8.27650000  |
| N | 2.72327900  | -1.43109000 | 1.38561300  |
| C | 2.88188800  | -0.33865200 | 0.38636900  |
| H | 2.08790900  | 0.38477300  | 0.59850300  |
| H | 3.82613800  | 0.16255300  | 0.62308900  |
| C | 1.54799600  | -2.31548200 | 1.18445000  |
| H | 1.20983200  | -2.59717000 | 2.18914500  |
| H | 0.76190100  | -1.69132300 | 0.74847200  |
| C | 3.97703500  | -2.11442400 | 1.79383700  |
| H | 4.50161000  | -1.40248200 | 2.44289200  |
| H | 3.67836000  | -2.95404900 | 2.42951000  |
| C | 2.81944500  | -0.74716100 | -1.08036600 |
| H | 2.97511300  | 0.14456200  | -1.69357800 |

|   |            |             |             |
|---|------------|-------------|-------------|
| H | 3.57967700 | -1.48180800 | -1.35292000 |
| H | 1.83662800 | -1.15155100 | -1.33857700 |
| C | 4.91528900 | -2.57108800 | 0.68452400  |
| H | 5.29733900 | -1.72277700 | 0.11048300  |
| H | 5.77451300 | -3.06895700 | 1.14220600  |
| H | 4.44419900 | -3.27548400 | -0.00424300 |
| C | 1.77202300 | -3.57005200 | 0.34961100  |
| H | 2.49568600 | -4.24105400 | 0.82039000  |
| H | 0.82549800 | -4.11220900 | 0.27436100  |
| H | 2.11339600 | -3.34429100 | -0.66301500 |

### Int5

E = -1526.421065 a.u.

0 1

|   |             |             |            |
|---|-------------|-------------|------------|
| C | 0.68623200  | 2.07823700  | 2.01267800 |
| C | 1.22232300  | 1.13902300  | 2.88456200 |
| C | 2.58861200  | 1.18077800  | 3.22514600 |
| C | 3.41886100  | 2.18432600  | 2.73072400 |
| C | 2.87619100  | 3.12001800  | 1.85082800 |
| C | 1.52778000  | 3.06259300  | 1.48522700 |
| H | -0.37149300 | 2.06718700  | 1.76310100 |
| H | 4.44842800  | 2.25445600  | 3.06743100 |
| H | 3.50157000  | 3.91685400  | 1.45965300 |
| H | 1.12379600  | 3.80820200  | 0.80709300 |
| C | 2.88415300  | 0.02386900  | 4.08468600 |
| O | 3.69174700  | 1.84281900  | 5.90676200 |
| C | 0.57326800  | 0.03157500  | 3.66830200 |
| H | 0.08548100  | 0.52010900  | 4.53150800 |
| H | -0.16103300 | -0.57669100 | 3.12806800 |
| C | 1.75322100  | -0.69235300 | 4.26341500 |
| H | 1.65578000  | -1.54128700 | 4.92943900 |
| H | 2.66404000  | -0.60614500 | 2.06387800 |
| H | 3.84162500  | -0.14886100 | 4.55687400 |
| S | 2.39515100  | 1.97020100  | 6.66375000 |
| O | 1.17126300  | 1.95041100  | 5.78745500 |
| C | 2.28967500  | 0.19658400  | 7.39374700 |
| F | 1.09978000  | -0.38738800 | 7.16615700 |
| F | 3.23188200  | -0.64392200 | 6.92424700 |
| F | 2.45204000  | 0.24793500  | 8.72752300 |
| N | 2.85813700  | -1.12479000 | 1.18640900 |
| C | 3.03952700  | -0.03611000 | 0.15803800 |
| H | 2.30742200  | 0.73243400  | 0.42288800 |
| H | 4.02984600  | 0.38739100  | 0.34260500 |
| C | 1.62161900  | -1.96529300 | 1.02054200 |



|   |             |              |              |
|---|-------------|--------------|--------------|
| H | 1. 34430300 | -2. 25153200 | 2. 03992700  |
| H | 0. 85018000 | -1. 28466800 | 0. 64874300  |
| C | 4. 10736600 | -1. 88354400 | 1. 54532200  |
| H | 4. 69098900 | -1. 18916500 | 2. 15716500  |
| H | 3. 78608800 | -2. 69734600 | 2. 20112900  |
| C | 2. 85968500 | -0. 45990900 | -1. 28970300 |
| H | 3. 04473100 | 0. 41754400  | -1. 91467300 |
| H | 3. 55028100 | -1. 24516000 | -1. 60269000 |
| H | 1. 83625200 | -0. 78773700 | -1. 48998700 |
| C | 4. 94568200 | -2. 38193900 | 0. 38030100  |
| H | 5. 34222700 | -1. 55401100 | -0. 21245400 |
| H | 5. 79986700 | -2. 92497100 | 0. 79287100  |
| H | 4. 40364000 | -3. 06147900 | -0. 27946200 |
| C | 1. 76332100 | -3. 20322300 | 0. 15067700  |
| H | 2. 46466100 | -3. 92070500 | 0. 58410600  |
| H | 0. 78683400 | -3. 69220300 | 0. 10456500  |
| H | 2. 07349100 | -2. 97731100 | -0. 87080400 |

#### Int4

E = -1526.474977 a.u.

0 1

|   |              |              |             |
|---|--------------|--------------|-------------|
| C | 0. 56839800  | 2. 14597500  | 1. 73008900 |
| C | 1. 14696200  | 1. 40609700  | 2. 75708800 |
| C | 2. 47383000  | 1. 64194900  | 3. 11905100 |
| C | 3. 23456800  | 2. 62088200  | 2. 49160900 |
| C | 2. 65213200  | 3. 36422600  | 1. 46649300 |
| C | 1. 32958900  | 3. 12349400  | 1. 08793200 |
| H | -0. 46201100 | 1. 96952400  | 1. 43394700 |
| H | 4. 26250300  | 2. 80118600  | 2. 79384400 |
| H | 3. 22829200  | 4. 12947400  | 0. 95619100 |
| H | 0. 88873700  | 3. 70448200  | 0. 28348800 |
| C | 2. 87406300  | 0. 74914900  | 4. 26162800 |
| O | 2. 98736600  | 1. 62001400  | 5. 44880100 |
| C | 0. 53900100  | 0. 33345000  | 3. 62639700 |
| H | -0. 10256900 | 0. 78122500  | 4. 39440700 |
| H | -0. 06184800 | -0. 38276700 | 3. 05811800 |
| C | 1. 77010100  | -0. 32249800 | 4. 27708600 |
| H | 1. 55991300  | -0. 74714800 | 5. 25755200 |
| H | 2. 13669800  | -1. 12124300 | 3. 62624600 |
| H | 3. 87309000  | 0. 31967500  | 4. 16304900 |
| S | 2. 20324000  | 1. 44751300  | 6. 84920700 |
| O | 0. 77660400  | 1. 12127600  | 6. 67551700 |
| C | 2. 97603700  | -0. 20756100 | 7. 36755900 |
| F | 2. 03709400  | -1. 13139400 | 7. 51316300 |

|   |             |              |              |
|---|-------------|--------------|--------------|
| F | 3. 89223900 | -0. 64710800 | 6. 50809600  |
| F | 3. 56757500 | -0. 00615200 | 8. 54414800  |
| N | 2. 84962500 | -1. 21643000 | 1. 20633900  |
| C | 3. 31987000 | -0. 14679200 | 0. 34434100  |
| H | 2. 65655100 | 0. 71636800  | 0. 48392300  |
| H | 4. 30415200 | 0. 16111600  | 0. 72106800  |
| C | 1. 53946400 | -1. 76501700 | 0. 91838800  |
| H | 1. 07806900 | -2. 07359300 | 1. 86983200  |
| H | 0. 92583600 | -0. 93854200 | 0. 53530600  |
| C | 3. 84304600 | -2. 12292800 | 1. 74845700  |
| H | 4. 47434900 | -1. 56069300 | 2. 45438000  |
| H | 3. 30622300 | -2. 87002500 | 2. 34821300  |
| C | 3. 40739300 | -0. 43526300 | -1. 16061400 |
| H | 3. 83148800 | 0. 43041900  | -1. 68027200 |
| H | 4. 02796800 | -1. 30735300 | -1. 38439500 |
| H | 2. 41141800 | -0. 61125600 | -1. 57990500 |
| C | 4. 77171100 | -2. 83832000 | 0. 75836100  |
| H | 5. 40593200 | -2. 11926700 | 0. 23050900  |
| H | 5. 43136100 | -3. 52893900 | 1. 29406300  |
| H | 4. 21057300 | -3. 40742900 | 0. 01194700  |
| C | 1. 46531900 | -2. 96154200 | -0. 04008600 |
| H | 1. 97686700 | -3. 83122900 | 0. 38517600  |
| H | 0. 42101400 | -3. 24490200 | -0. 20834500 |
| H | 1. 92198500 | -2. 74070600 | -1. 00852300 |

### Int1

E = -1615.3143 a.u.

O 1

|   |             |              |             |
|---|-------------|--------------|-------------|
| S | 3. 06922900 | 0. 49098600  | 4. 75114100 |
| O | 2. 47024100 | -0. 64991400 | 5. 45453500 |
| C | 4. 59468400 | -0. 26563700 | 3. 95380200 |
| F | 5. 28933200 | -0. 93010500 | 4. 86065000 |
| F | 4. 24414300 | -1. 11939400 | 2. 99416200 |
| F | 5. 34535600 | 0. 69184100  | 3. 42432400 |
| N | 1. 64829900 | 0. 21910600  | 2. 69154100 |
| C | 1. 22388900 | -1. 17522400 | 2. 53747600 |
| H | 2. 09664500 | -1. 81248800 | 2. 70963300 |
| H | 0. 53178700 | -1. 38399100 | 3. 36032800 |
| C | 2. 46959800 | 0. 79131200  | 1. 61903600 |
| H | 3. 15504400 | 1. 51707700  | 2. 08334100 |
| H | 3. 08882600 | -0. 01824200 | 1. 22154600 |
| C | 0. 63645300 | 1. 11790200  | 3. 25305400 |
| H | 0. 50079200 | 0. 83203400  | 4. 30663200 |
| H | 1. 06894400 | 2. 12567100  | 3. 25507200 |

|   |             |             |             |
|---|-------------|-------------|-------------|
| C | 0.59544500  | -1.56383900 | 1.19706400  |
| H | 0.30856400  | -2.61958700 | 1.22447400  |
| H | -0.29522600 | -0.97500100 | 0.96459400  |
| H | 1.30979800  | -1.43992500 | 0.37715200  |
| C | -0.74649100 | 1.13162300  | 2.59808800  |
| H | -1.23702600 | 0.15872500  | 2.69579100  |
| H | -1.37577800 | 1.86810900  | 3.10705900  |
| H | -0.70772700 | 1.39209600  | 1.53813700  |
| C | 1.74343100  | 1.49900500  | 0.47314700  |
| H | 1.20373700  | 2.38088300  | 0.82971500  |
| H | 2.48014200  | 1.84191100  | -0.25959600 |
| H | 1.03462000  | 0.84181000  | -0.03732000 |
| C | 5.96386400  | 5.47589200  | 7.04251300  |
| C | 5.33752900  | 4.47092900  | 6.33370000  |
| C | 5.20122900  | 3.19021800  | 6.85472500  |
| C | 5.68267400  | 2.84788300  | 8.10386200  |
| C | 6.32280500  | 3.85971900  | 8.83041500  |
| C | 6.46086300  | 5.14775100  | 8.31067900  |
| H | 6.06369100  | 6.47426100  | 6.62913600  |
| H | 5.57000700  | 1.84492500  | 8.50166000  |
| H | 6.71881000  | 3.63974000  | 9.81655100  |
| H | 6.96277200  | 5.90665900  | 8.90234400  |
| C | 4.68398700  | 4.44360500  | 4.97169600  |
| C | 4.47805000  | 2.43968700  | 5.79383300  |
| N | 4.18957800  | 3.12450000  | 4.73629900  |
| O | 4.58593500  | 5.36339500  | 4.20449600  |
| O | 4.18611000  | 1.16710900  | 5.98352800  |

### TS2-3

E = -2039.320436 a.u.

0 1

|   |             |             |            |
|---|-------------|-------------|------------|
| S | 2.08821500  | 0.84967900  | 4.58944000 |
| O | 2.02149700  | -0.57190000 | 4.96675400 |
| C | 3.75311800  | 0.69513600  | 3.63138400 |
| F | 4.67841800  | 0.32301200  | 4.49384400 |
| F | 3.58834000  | -0.31813200 | 2.76583400 |
| F | 4.17149800  | 1.74306200  | 2.95657100 |
| N | 0.89743300  | 0.82892100  | 2.76866800 |
| C | 0.64315600  | -0.62006500 | 2.55560800 |
| H | 1.56330200  | -1.15173000 | 2.80019000 |
| H | -0.08603400 | -0.92450700 | 3.31121800 |
| C | 1.59521500  | 1.55291000  | 1.66054700 |
| H | 2.09938800  | 2.39153100  | 2.15233400 |
| H | 2.34303900  | 0.86849600  | 1.25765400 |

|   |             |             |             |
|---|-------------|-------------|-------------|
| C | -0.30018900 | 1.56839400  | 3.26037900  |
| H | -0.40749100 | 1.33655400  | 4.32673700  |
| H | -0.04978500 | 2.62735900  | 3.18839400  |
| C | 0.18445600  | -1.03530800 | 1.16116900  |
| H | 0.05698500  | -2.12144500 | 1.16279900  |
| H | -0.76555600 | -0.58507300 | 0.86822700  |
| H | 0.93504700  | -0.79531500 | 0.40386100  |
| C | -1.63098200 | 1.26586400  | 2.57735500  |
| H | -1.93460100 | 0.22489000  | 2.71424000  |
| H | -2.39305200 | 1.89225300  | 3.04979000  |
| H | -1.62730700 | 1.49210500  | 1.51045500  |
| C | 0.71966800  | 2.10463400  | 0.53769600  |
| H | 0.04061200  | 2.88186500  | 0.89778800  |
| H | 1.38903600  | 2.57751400  | -0.18690100 |
| H | 0.14050300  | 1.34419900  | 0.01060600  |
| C | 6.89545000  | 4.80721400  | 7.73532000  |
| C | 5.98547200  | 4.08765100  | 6.98379100  |
| C | 5.34149200  | 2.96869400  | 7.49528100  |
| C | 5.57585400  | 2.51542900  | 8.78049600  |
| C | 6.49452400  | 3.23424700  | 9.55105700  |
| C | 7.14267000  | 4.36121200  | 9.03731400  |
| H | 7.38424300  | 5.68562800  | 7.32644300  |
| H | 5.05883000  | 1.64412600  | 9.16923800  |
| H | 6.70781000  | 2.91676000  | 10.56693600 |
| H | 7.84731100  | 4.89869700  | 9.66425400  |
| C | 5.45981700  | 4.32203800  | 5.59576400  |
| C | 4.39802000  | 2.48632800  | 6.43947900  |
| N | 4.56459600  | 3.28244700  | 5.33723900  |
| O | 5.73860000  | 5.22864800  | 4.84738700  |
| O | 3.61086400  | 1.55105600  | 6.53621600  |
| O | 2.35935600  | 3.16422600  | 4.07819000  |
| H | 3.70315600  | 3.33107500  | 4.63955100  |
| C | 1.47006300  | 4.05734400  | 4.68065200  |
| C | 1.99151300  | 4.65297100  | 5.98588900  |
| C | 1.32778700  | 5.33362200  | 3.81665100  |
| C | 2.62601600  | 5.87138600  | 5.73362600  |
| C | 1.96032200  | 4.11820800  | 7.26775300  |
| C | 2.50615100  | 6.22267400  | 4.26710500  |
| H | 0.38387100  | 5.84379300  | 4.04578400  |
| H | 1.34923400  | 5.08684500  | 2.75051600  |
| C | 3.27390100  | 6.55117000  | 6.75947600  |
| C | 2.59727300  | 4.80642600  | 8.30235700  |
| H | 1.47356000  | 3.16482500  | 7.45806100  |
| H | 2.33443100  | 7.28936000  | 4.09438900  |

|   |            |            |            |
|---|------------|------------|------------|
| H | 3.43323700 | 5.94413900 | 3.75035900 |
| C | 3.25678800 | 6.00933600 | 8.04632000 |
| H | 3.79177800 | 7.48603900 | 6.56281500 |
| H | 2.59135700 | 4.39918800 | 9.30917000 |
| H | 3.76220300 | 6.52742100 | 8.85609900 |
| H | 0.48920200 | 3.58160700 | 4.86808900 |

## Int2

E = -2039.351682 a.u.

O 1

|   |             |             |             |
|---|-------------|-------------|-------------|
| S | 2.65462600  | 1.08140700  | 4.82211400  |
| O | 2.24489400  | -0.24041300 | 5.30927600  |
| C | 4.12398700  | 0.72751700  | 3.66435600  |
| F | 5.27106500  | 0.59068000  | 4.31308500  |
| F | 3.87229900  | -0.40981600 | 3.02438600  |
| F | 4.24029000  | 1.70739700  | 2.78046100  |
| N | 1.05554000  | 0.71701800  | 2.88225400  |
| C | 0.81687200  | -0.73411400 | 2.84960600  |
| H | 1.78797200  | -1.23133400 | 2.91637700  |
| H | 0.29309000  | -0.98795200 | 3.77606200  |
| C | 1.56033700  | 1.31913900  | 1.63657100  |
| H | 2.12389800  | 2.21069800  | 1.92032900  |
| H | 2.26739100  | 0.60174300  | 1.20493200  |
| C | -0.00122700 | 1.48379300  | 3.55219600  |
| H | 0.06852100  | 1.25639000  | 4.62695800  |
| H | 0.25989900  | 2.53959300  | 3.43195900  |
| C | 0.06619600  | -1.29948200 | 1.64175100  |
| H | -0.05057400 | -2.37966500 | 1.77442000  |
| H | -0.92842700 | -0.86464100 | 1.51711300  |
| H | 0.62692900  | -1.14301200 | 0.71544800  |
| C | -1.45209500 | 1.22536400  | 3.13672100  |
| H | -1.75045800 | 0.19696800  | 3.36032500  |
| H | -2.10754400 | 1.88764700  | 3.71132900  |
| H | -1.62936400 | 1.41166700  | 2.07564000  |
| C | 0.53426600  | 1.75375600  | 0.58624300  |
| H | -0.07823900 | 2.57877100  | 0.96247000  |
| H | 1.07050700  | 2.12622500  | -0.29219500 |
| H | -0.12845500 | 0.94811000  | 0.26290000  |
| C | 6.77806100  | 4.86450600  | 7.70518200  |
| C | 5.92514600  | 4.17045600  | 6.87130000  |
| C | 5.30619000  | 2.99657700  | 7.27822400  |
| C | 5.50741000  | 2.45268800  | 8.53188000  |
| C | 6.37089000  | 3.14842000  | 9.38720600  |
| C | 6.99337100  | 4.33105400  | 8.98265000  |

|   |             |             |              |
|---|-------------|-------------|--------------|
| H | 7. 25423200 | 5. 78419500 | 7. 38078500  |
| H | 5. 01544800 | 1. 53583700 | 8. 83907100  |
| H | 6. 56044200 | 2. 76301000 | 10. 38385400 |
| H | 7. 65600400 | 4. 84355800 | 9. 67274900  |
| C | 5. 42446300 | 4. 45018800 | 5. 47782200  |
| C | 4. 45739500 | 2. 60328900 | 6. 12329600  |
| N | 4. 51765600 | 3. 41355600 | 5. 11054000  |
| O | 5. 72795100 | 5. 38025400 | 4. 77590800  |
| O | 3. 76706400 | 1. 49757200 | 6. 18025500  |
| O | 2. 20611800 | 3. 99797800 | 3. 36626500  |
| H | 3. 08038500 | 3. 92112300 | 3. 80125900  |
| C | 1. 42319800 | 4. 94987800 | 4. 07426200  |
| C | 1. 73724900 | 4. 90919600 | 5. 55479900  |
| C | 1. 75803500 | 6. 40595100 | 3. 69687600  |
| C | 2. 59494100 | 5. 95933700 | 5. 89116100  |
| C | 1. 40368400 | 3. 92940100 | 6. 48248500  |
| C | 2. 84501700 | 6. 85215300 | 4. 69710000  |
| H | 0. 86213200 | 7. 02216900 | 3. 83068900  |
| H | 2. 06902100 | 6. 47182200 | 2. 65212300  |
| C | 3. 14051000 | 6. 03001400 | 7. 17035400  |
| C | 1. 95005300 | 4. 00070600 | 7. 76457000  |
| H | 0. 73472300 | 3. 11585800 | 6. 21063900  |
| H | 2. 77932700 | 7. 91559400 | 4. 94599500  |
| H | 3. 85226300 | 6. 66804600 | 4. 30570400  |
| C | 2. 81580300 | 5. 04350100 | 8. 10188100  |
| H | 3. 82432600 | 6. 83198000 | 7. 43646200  |
| H | 1. 70863700 | 3. 23978300 | 8. 50062100  |
| H | 3. 25212800 | 5. 07874400 | 9. 09622700  |
| H | 0. 37921200 | 4. 70488800 | 3. 84843100  |

### Int3

E = -2039.381289 a.u.

0 1

|   |              |              |             |
|---|--------------|--------------|-------------|
| S | 1. 75948100  | 0. 50145000  | 5. 41039900 |
| O | 0. 55058500  | -0. 22253300 | 4. 98590900 |
| C | 3. 09566400  | -0. 10181300 | 4. 22546800 |
| F | 3. 85582200  | -0. 95709900 | 4. 90032400 |
| F | 2. 52273000  | -0. 74180600 | 3. 22123600 |
| F | 3. 86604400  | 0. 86496100  | 3. 73256100 |
| N | 0. 26493400  | 0. 60713700  | 1. 93835700 |
| C | 0. 06320700  | -0. 70549900 | 1. 36688200 |
| H | 0. 97902900  | -1. 29464200 | 1. 51030700 |
| H | -0. 71169900 | -1. 20079600 | 1. 96462800 |
| C | 1. 28204300  | 1. 45188300  | 1. 35542500 |

|   |              |              |              |
|---|--------------|--------------|--------------|
| H | 1. 78993100  | 1. 99677600  | 2. 16636300  |
| H | 2. 04006600  | 0. 79054200  | 0. 91677600  |
| C | -0. 86915800 | 1. 23711300  | 2. 57640700  |
| H | -1. 14490600 | 0. 63616500  | 3. 45310000  |
| H | -0. 52440700 | 2. 20282100  | 2. 96640600  |
| C | -0. 31049600 | -0. 76108100 | -0. 12132300 |
| H | -0. 46891800 | -1. 79804600 | -0. 43686700 |
| H | -1. 22070300 | -0. 19339700 | -0. 33554800 |
| H | 0. 49569600  | -0. 34945200 | -0. 73826400 |
| C | -2. 12027300 | 1. 45793300  | 1. 71407400  |
| H | -2. 54752200 | 0. 50045000  | 1. 39855200  |
| H | -2. 88958500 | 1. 98642300  | 2. 28796000  |
| H | -1. 89958300 | 2. 04112600  | 0. 81487600  |
| C | 0. 81972700  | 2. 47053400  | 0. 30492300  |
| H | 0. 12537600  | 3. 19492200  | 0. 74577200  |
| H | 1. 67459400  | 3. 03031100  | -0. 08986900 |
| H | 0. 30855000  | 1. 98420400  | -0. 53149000 |
| C | 6. 31457000  | 5. 52157000  | 7. 45765500  |
| C | 5. 66627700  | 4. 51465100  | 6. 76573500  |
| C | 5. 43478800  | 3. 26897400  | 7. 33441100  |
| C | 5. 84070200  | 2. 96961300  | 8. 62213400  |
| C | 6. 49814700  | 3. 97749400  | 9. 33245600  |
| C | 6. 73153900  | 5. 23195900  | 8. 75973000  |
| H | 6. 48104200  | 6. 49308300  | 7. 00379300  |
| H | 5. 64306600  | 1. 99509400  | 9. 05645300  |
| H | 6. 83346000  | 3. 78748100  | 10. 34698700 |
| H | 7. 24426800  | 5. 99239300  | 9. 34006600  |
| C | 5. 04313500  | 4. 53113800  | 5. 40591900  |
| C | 4. 66687000  | 2. 44514400  | 6. 35332300  |
| N | 4. 51329400  | 3. 25150000  | 5. 23082500  |
| O | 4. 97667800  | 5. 44388700  | 4. 61898300  |
| O | 4. 25312800  | 1. 31573600  | 6. 48659700  |
| O | 1. 79087700  | 2. 01319100  | 4. 70620200  |
| H | 3. 93199900  | 2. 97105100  | 4. 44835700  |
| C | 0. 87018100  | 2. 94419800  | 5. 34218800  |
| C | 1. 48242500  | 3. 56020200  | 6. 58111200  |
| C | 0. 68243700  | 4. 14178900  | 4. 39563300  |
| C | 1. 94135700  | 4. 85084100  | 6. 30450900  |
| C | 1. 65977200  | 2. 99299400  | 7. 83983000  |
| C | 1. 66718900  | 5. 23031200  | 4. 86995200  |
| H | -0. 34691200 | 4. 49936600  | 4. 49690400  |
| H | 0. 83403100  | 3. 84504900  | 3. 35536400  |
| C | 2. 58831600  | 5. 59071700  | 7. 28973100  |
| C | 2. 30633800  | 3. 73719600  | 8. 82674100  |

|   |              |             |             |
|---|--------------|-------------|-------------|
| H | 1. 30722500  | 1. 98831900 | 8. 05530200 |
| H | 1. 24505100  | 6. 23528800 | 4. 77865400 |
| H | 2. 59753400  | 5. 22652100 | 4. 28946300 |
| C | 2. 76519200  | 5. 02631800 | 8. 55297400 |
| H | 2. 95861700  | 6. 58950300 | 7. 07402800 |
| H | 2. 45534900  | 3. 31008900 | 9. 81341000 |
| H | 3. 27808600  | 5. 58967500 | 9. 32708100 |
| H | -0. 06833800 | 2. 40905600 | 5. 52451000 |



## IX. NMR spectrum of the products

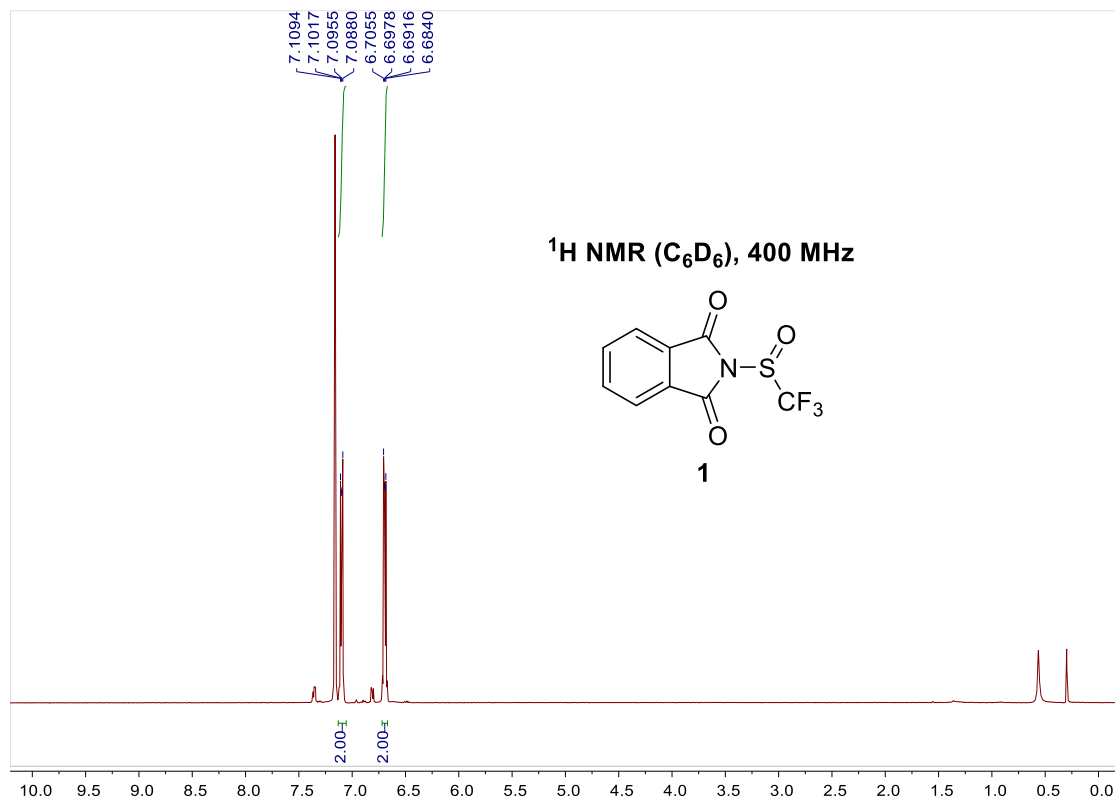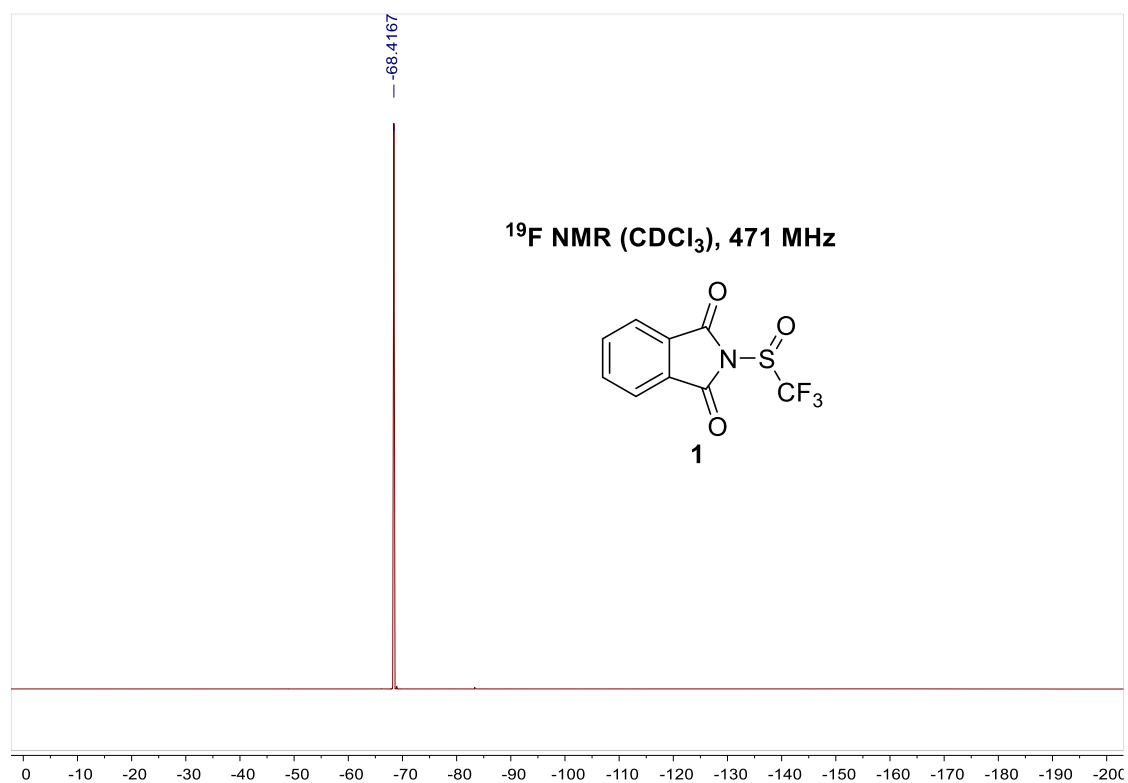

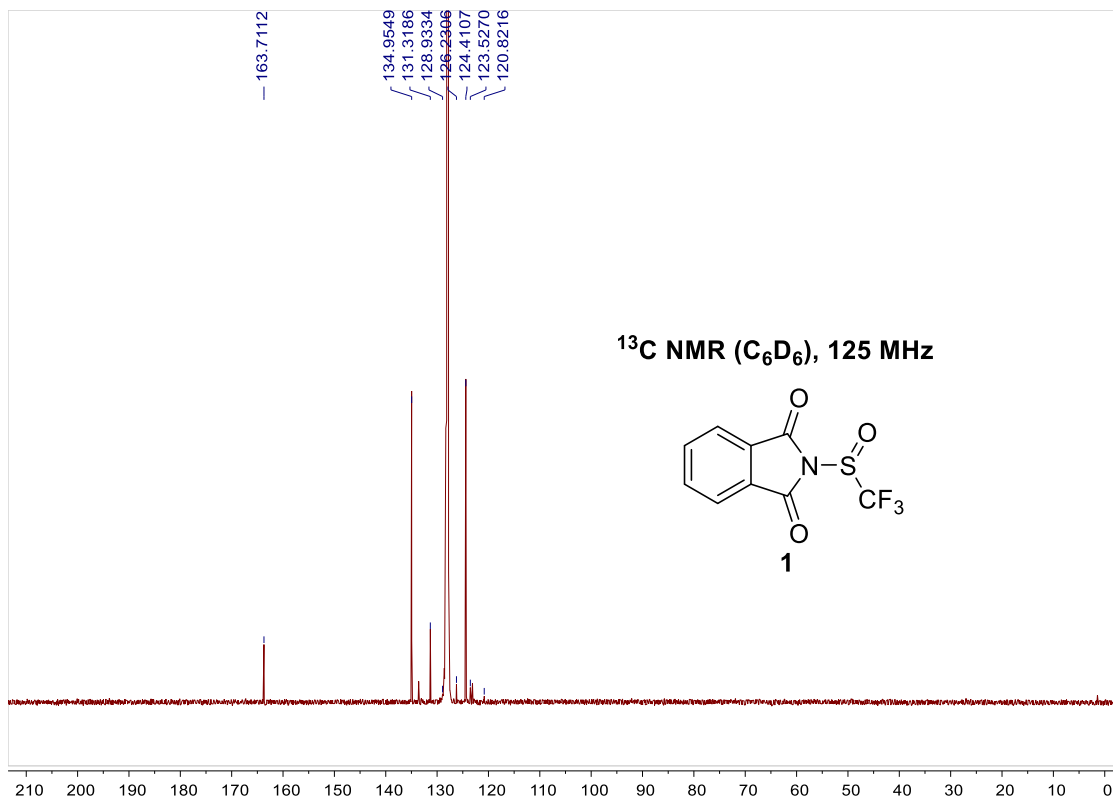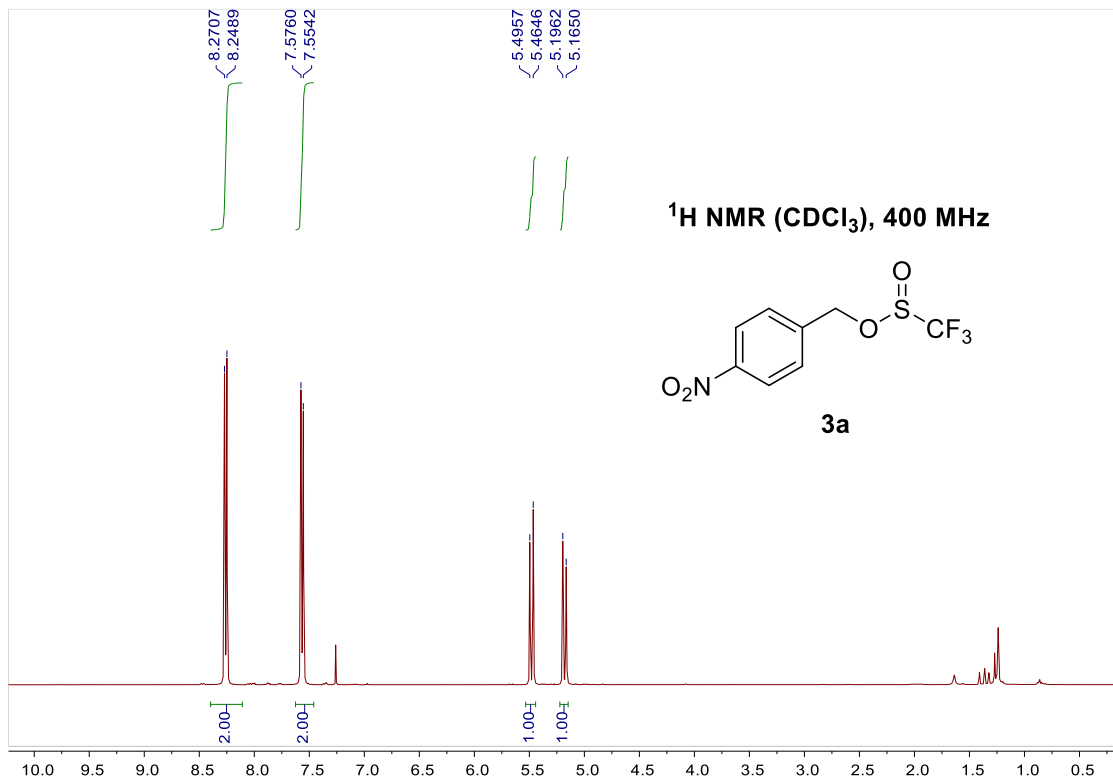

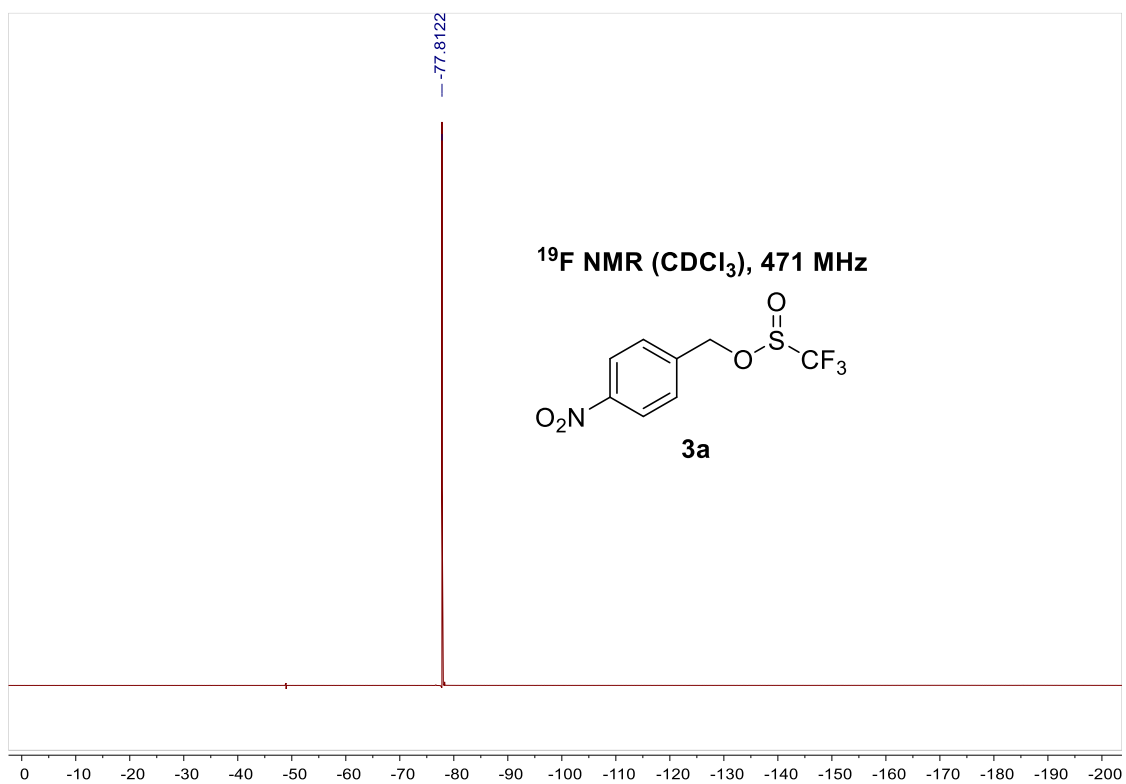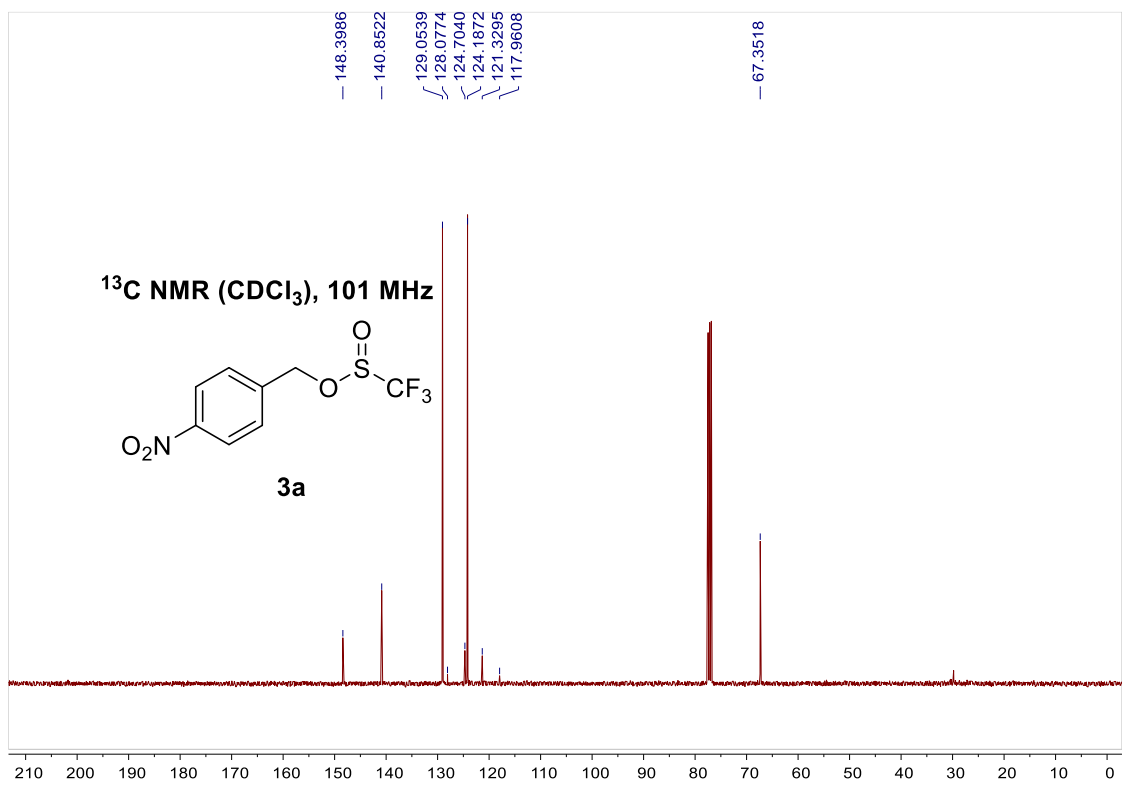

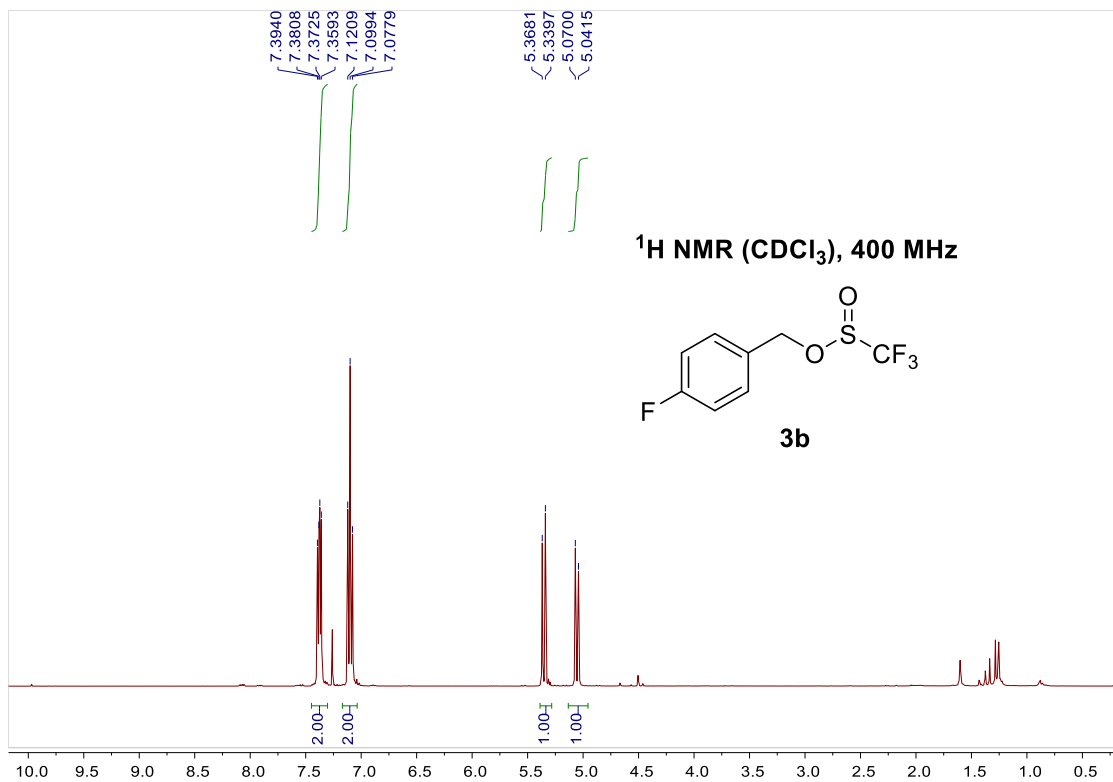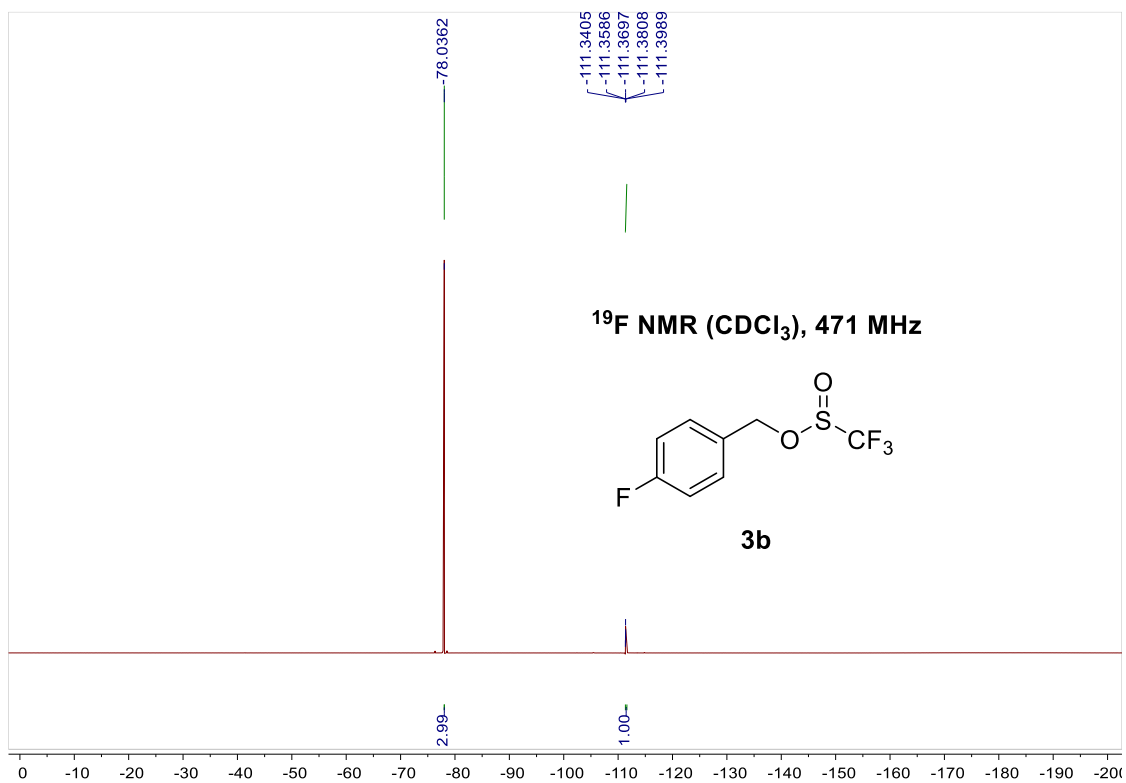

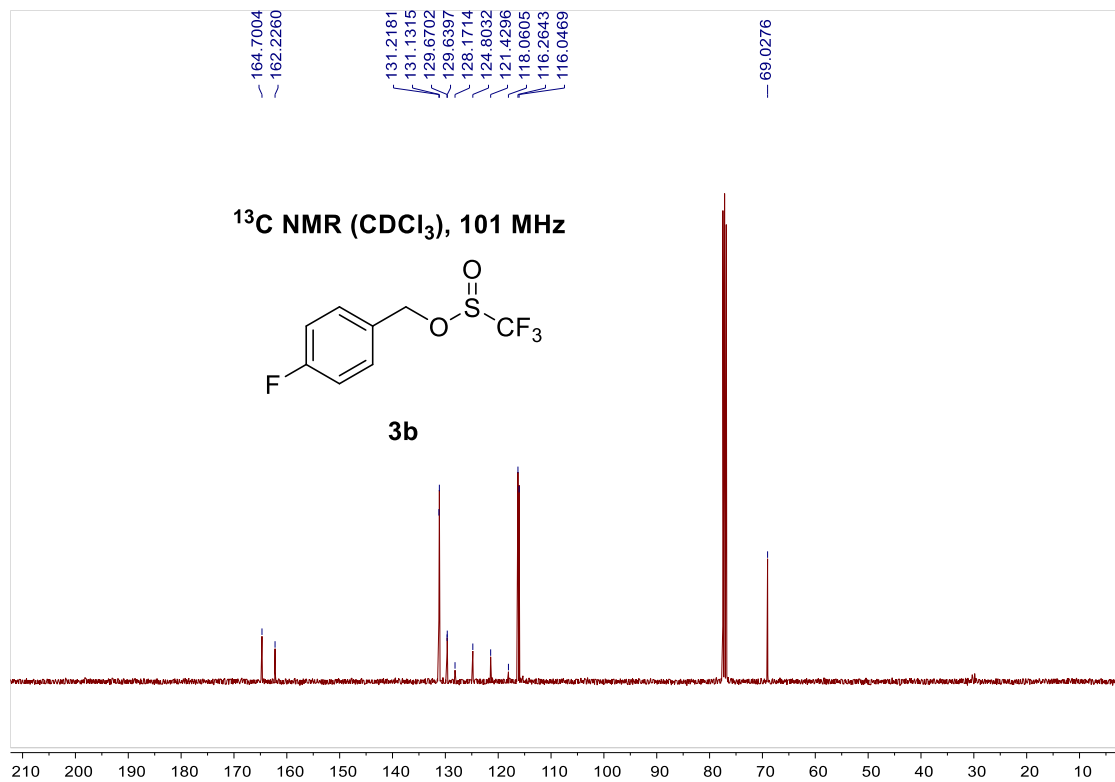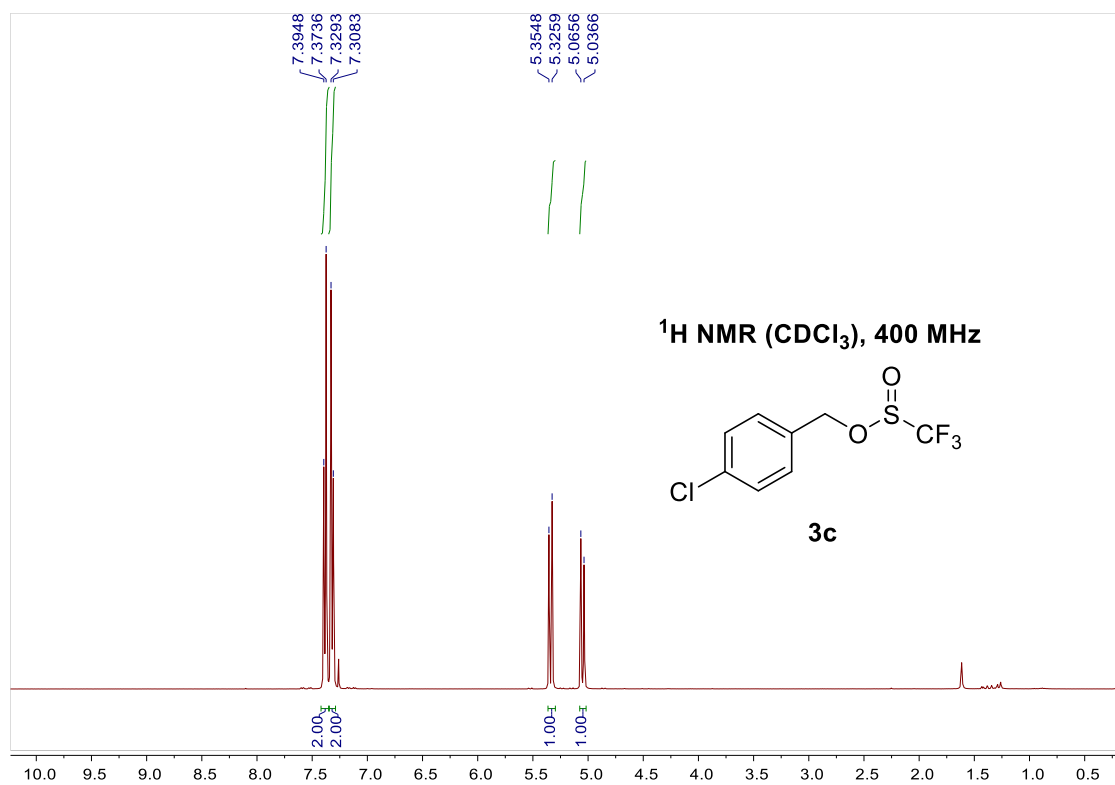

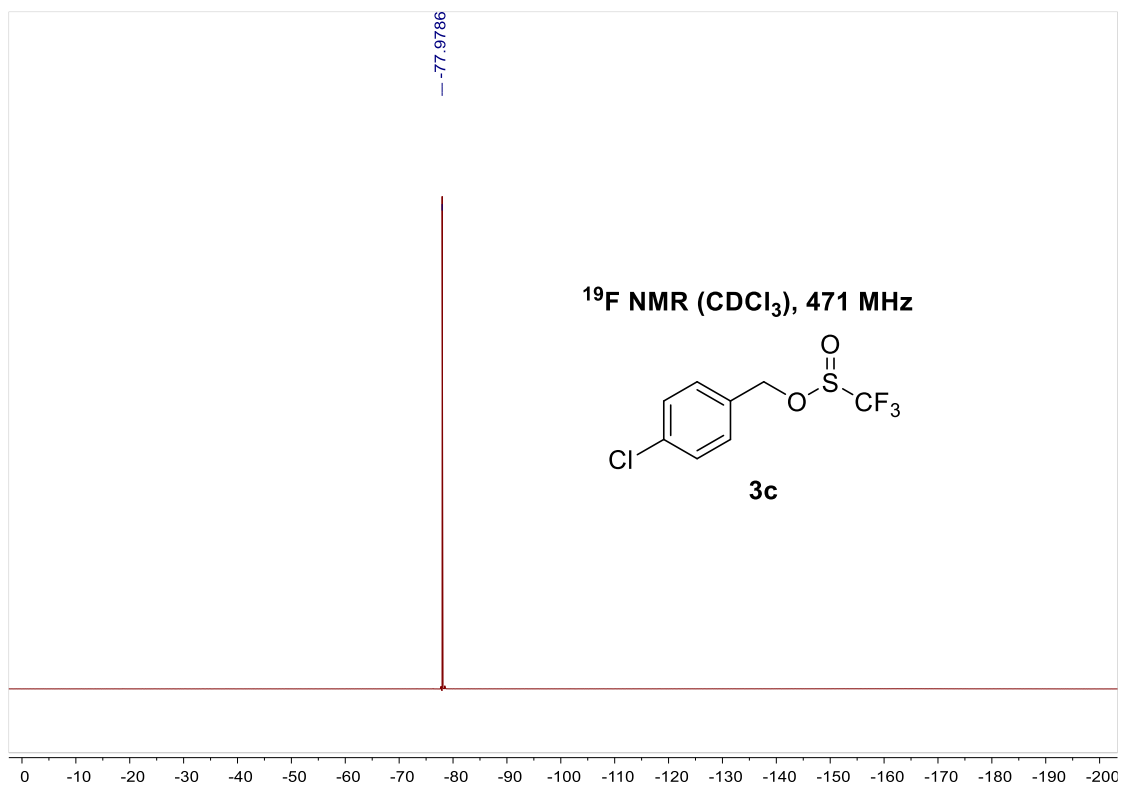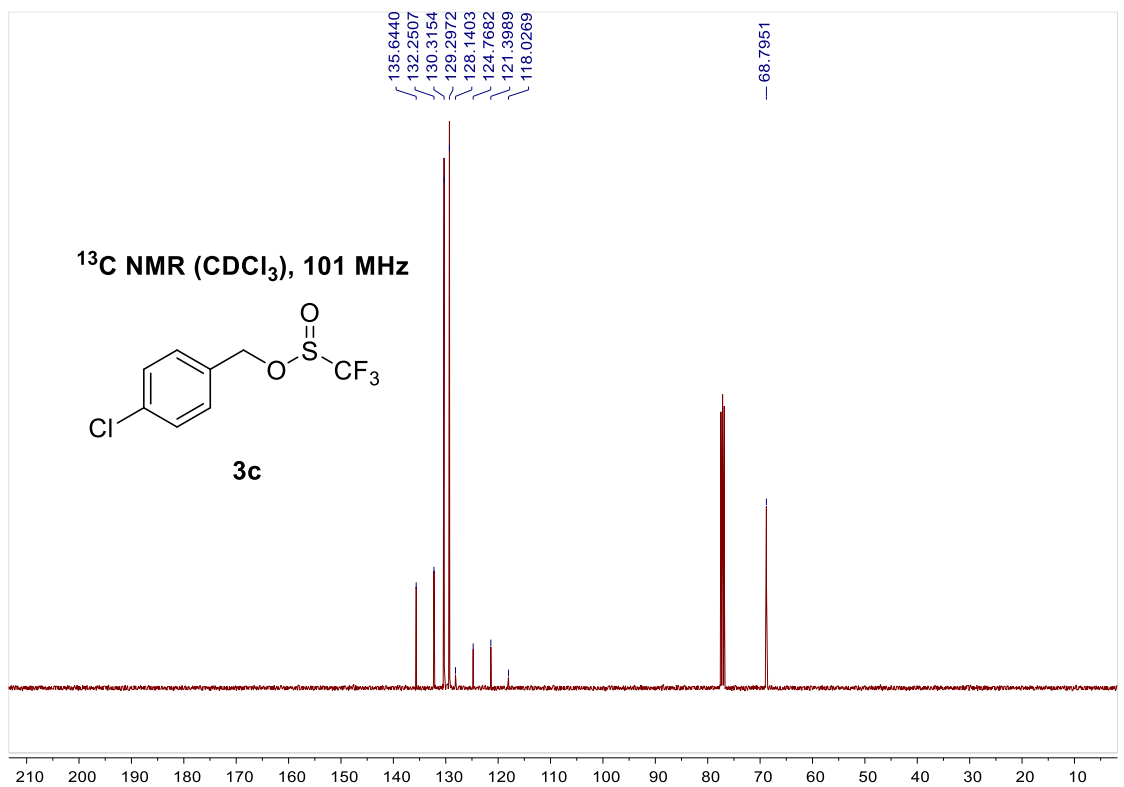

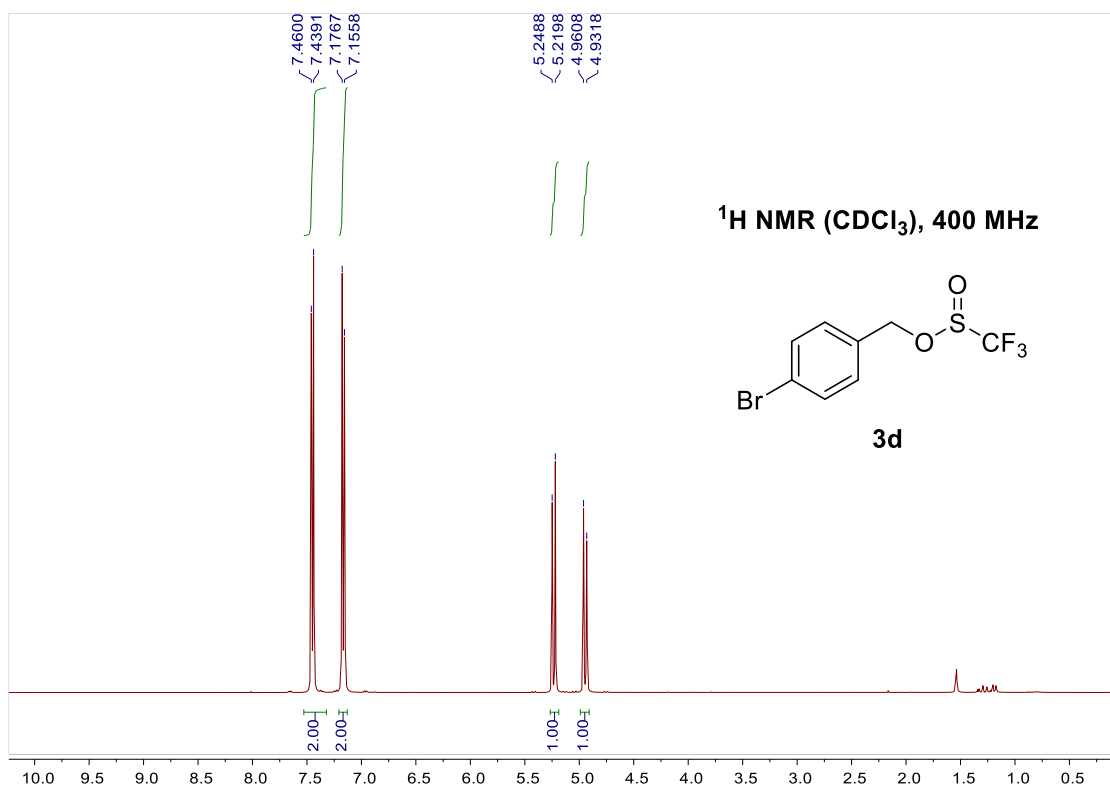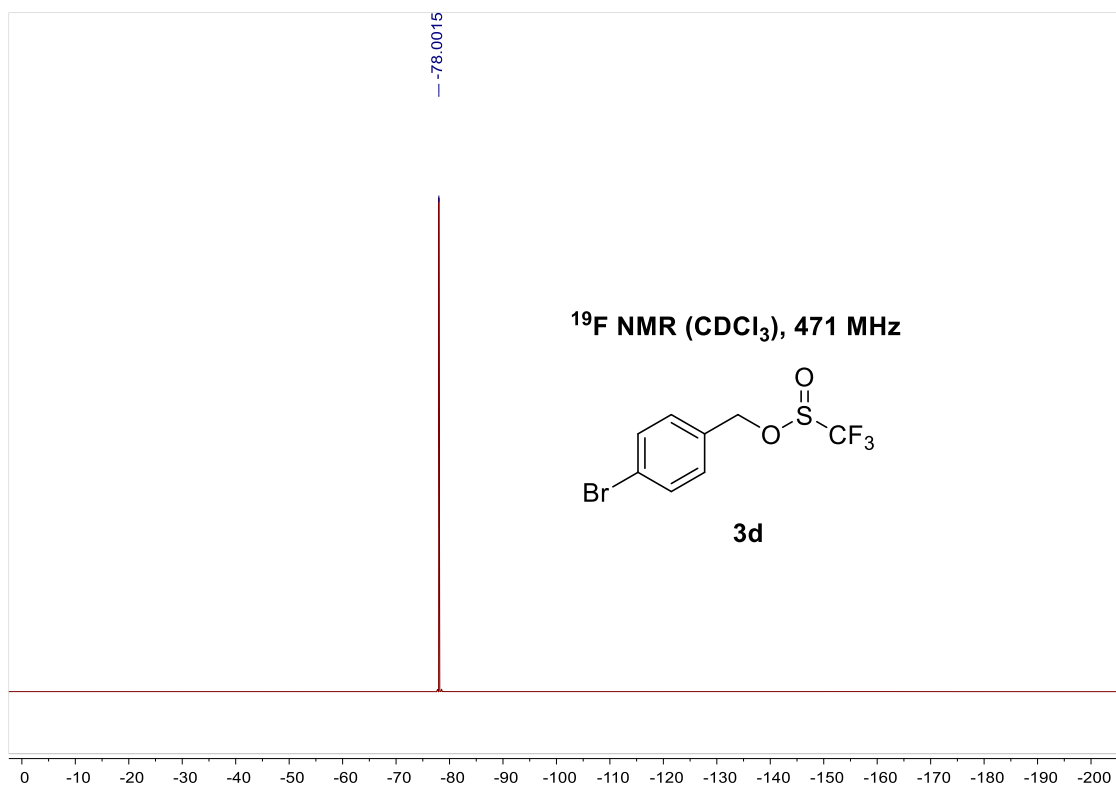

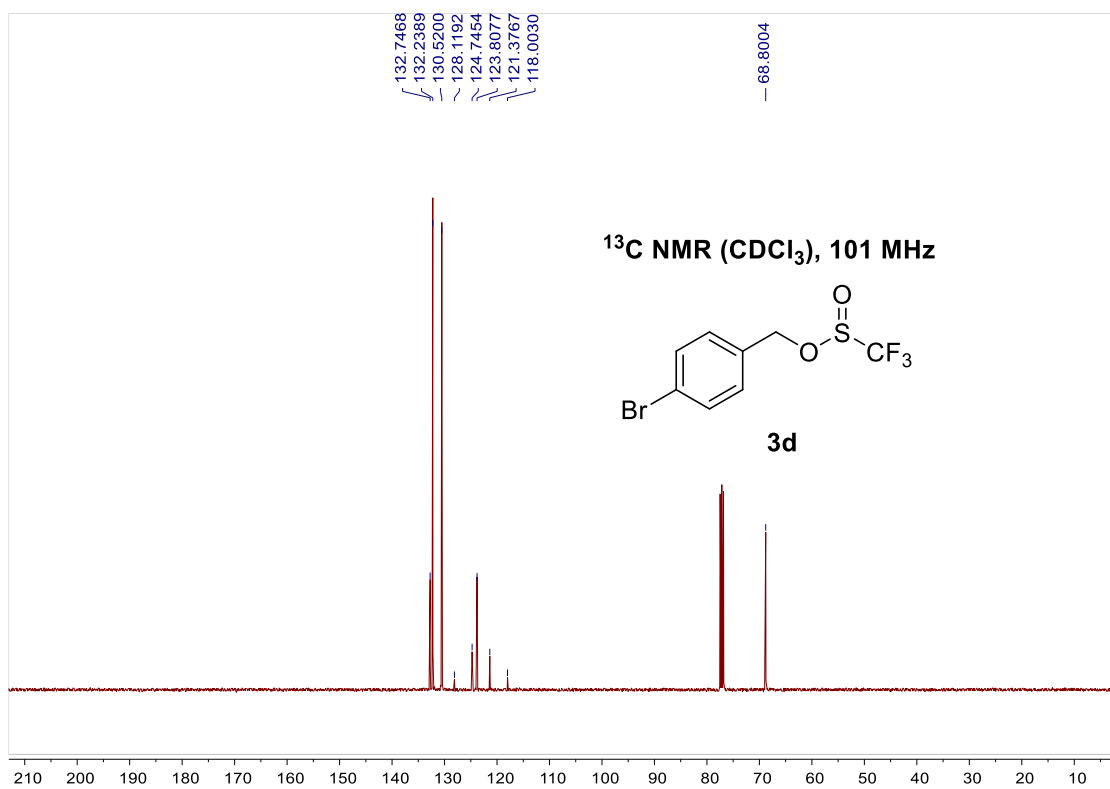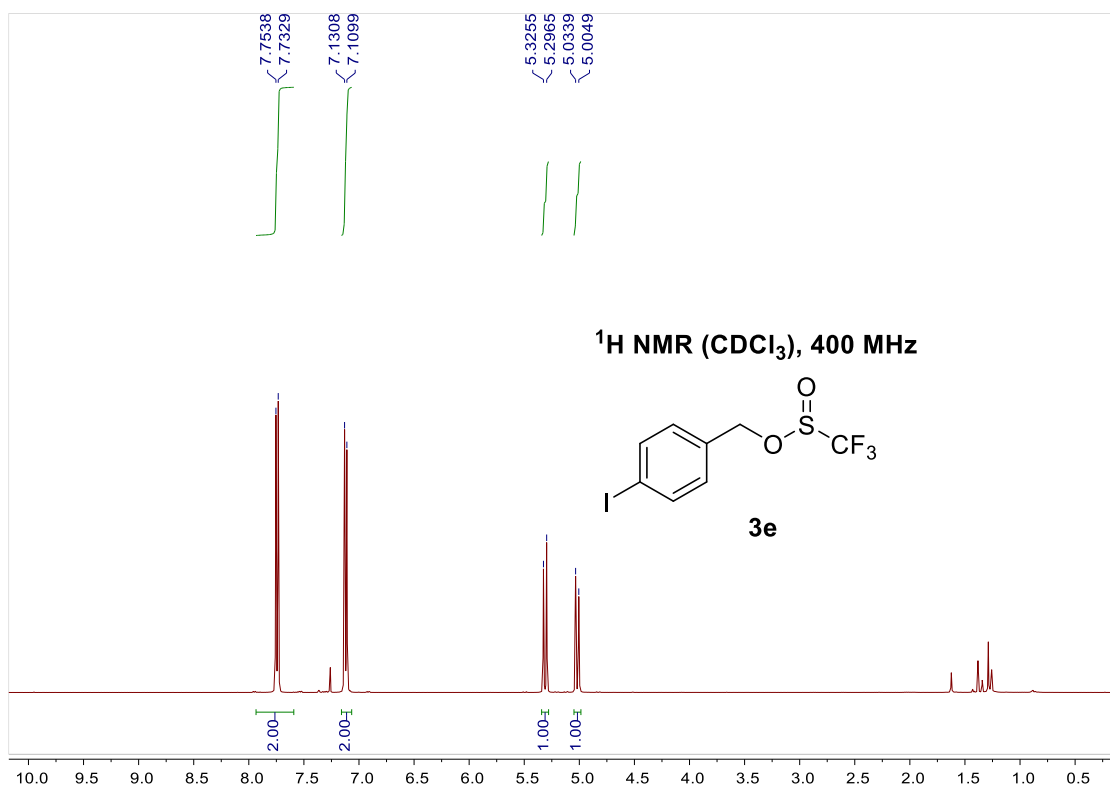



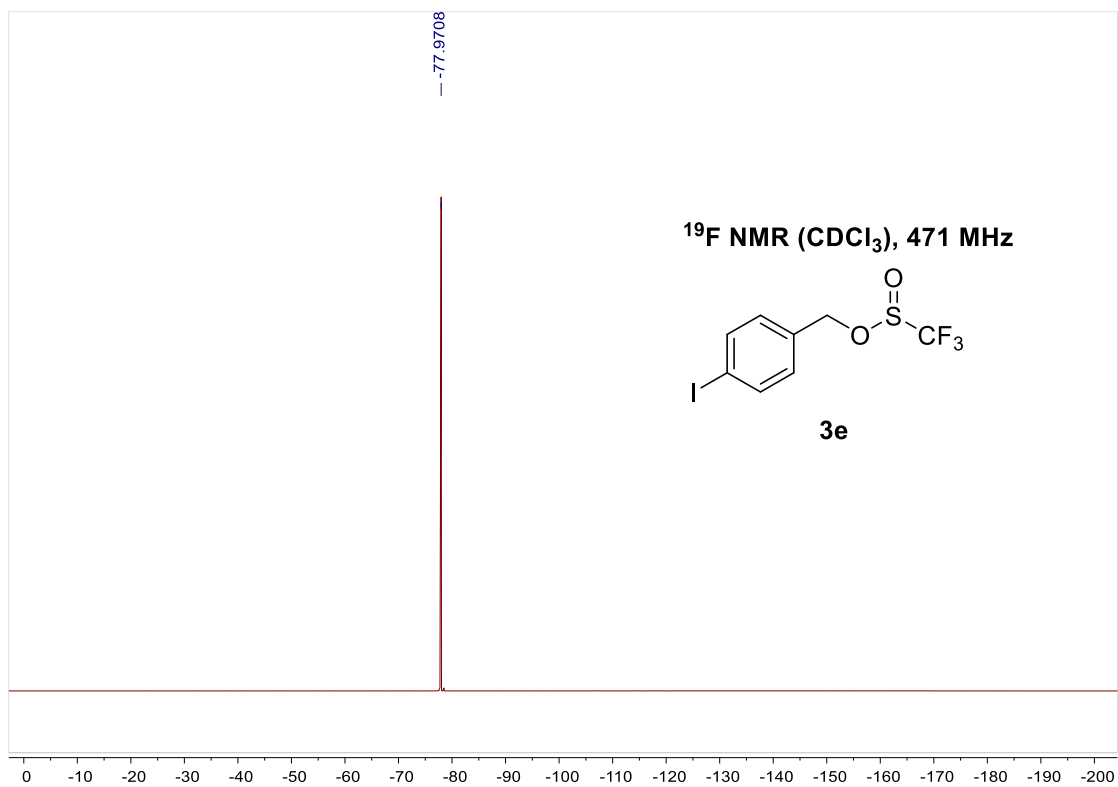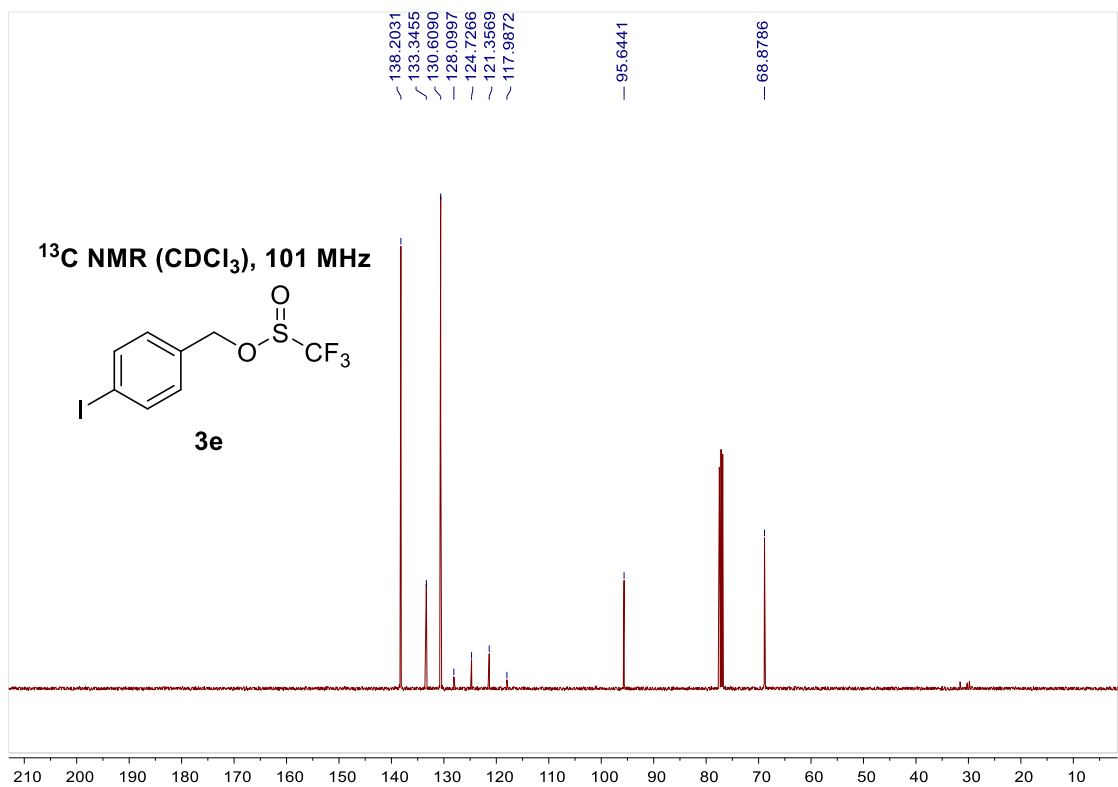

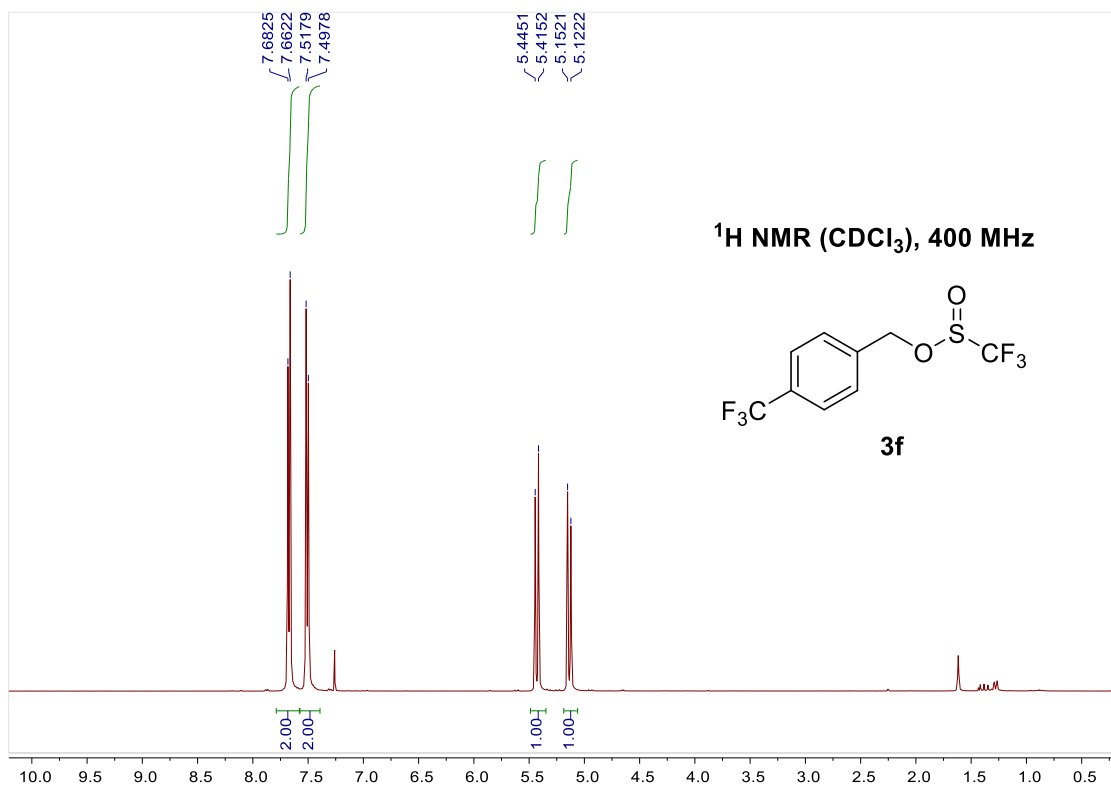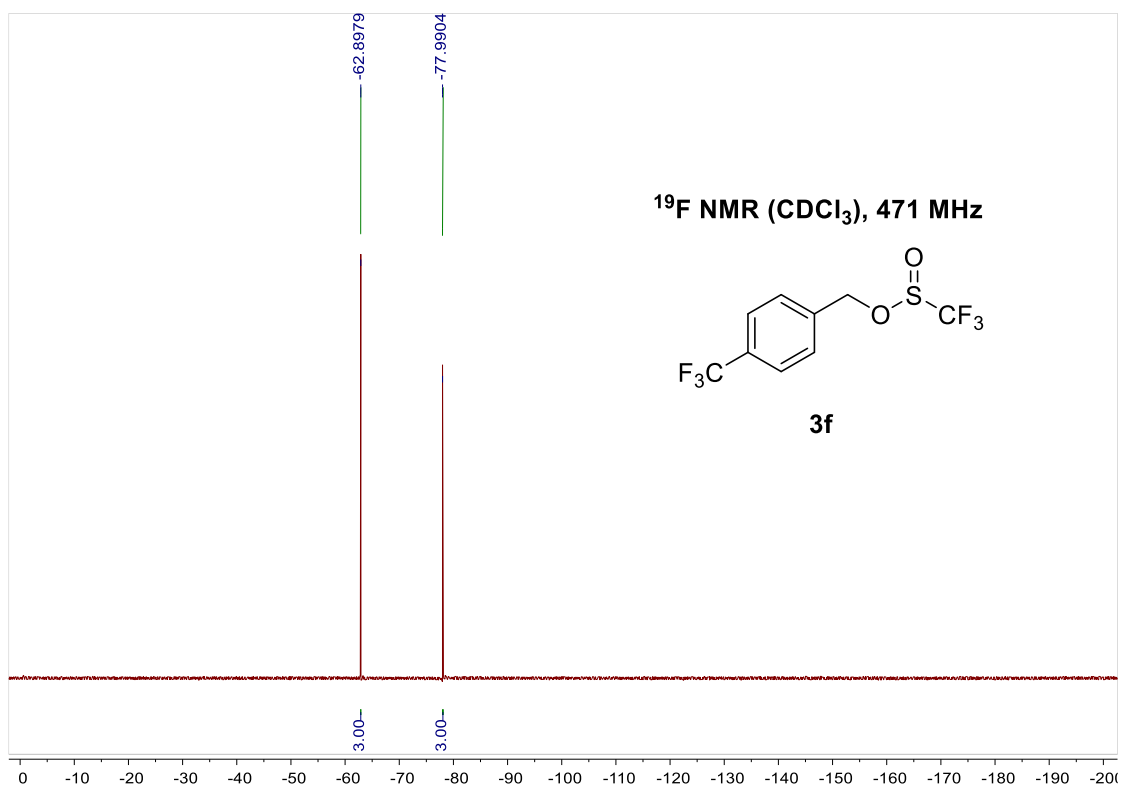

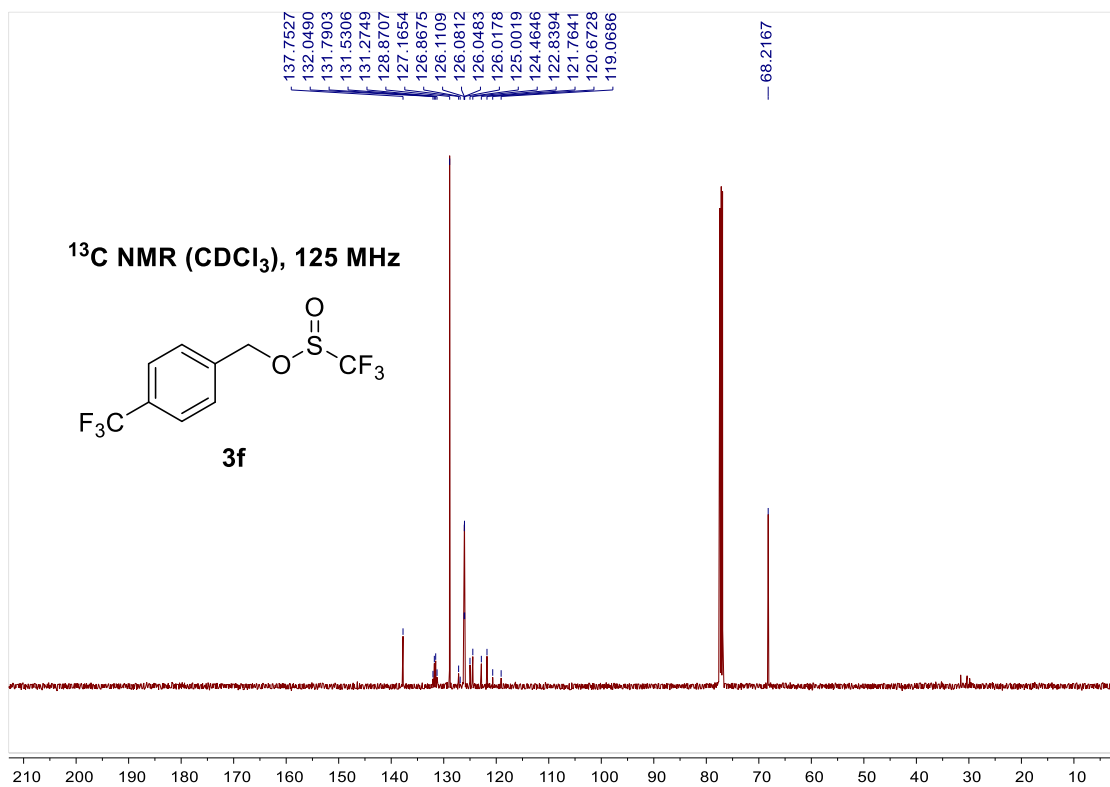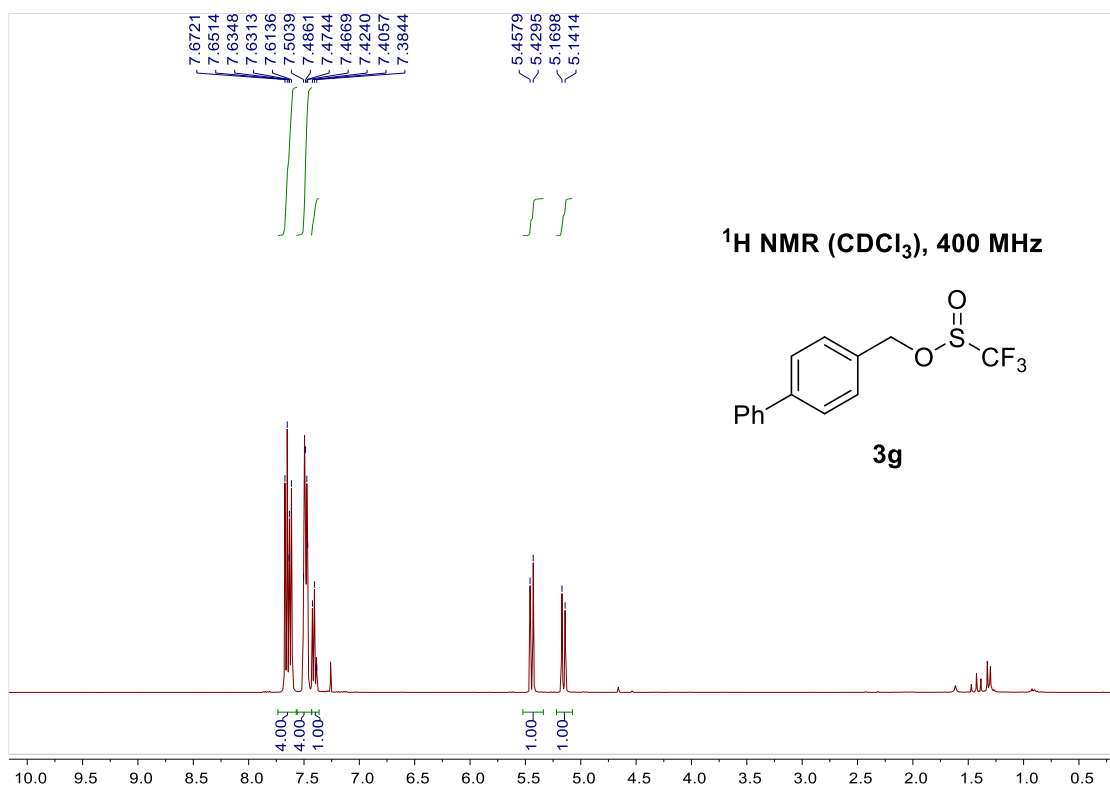

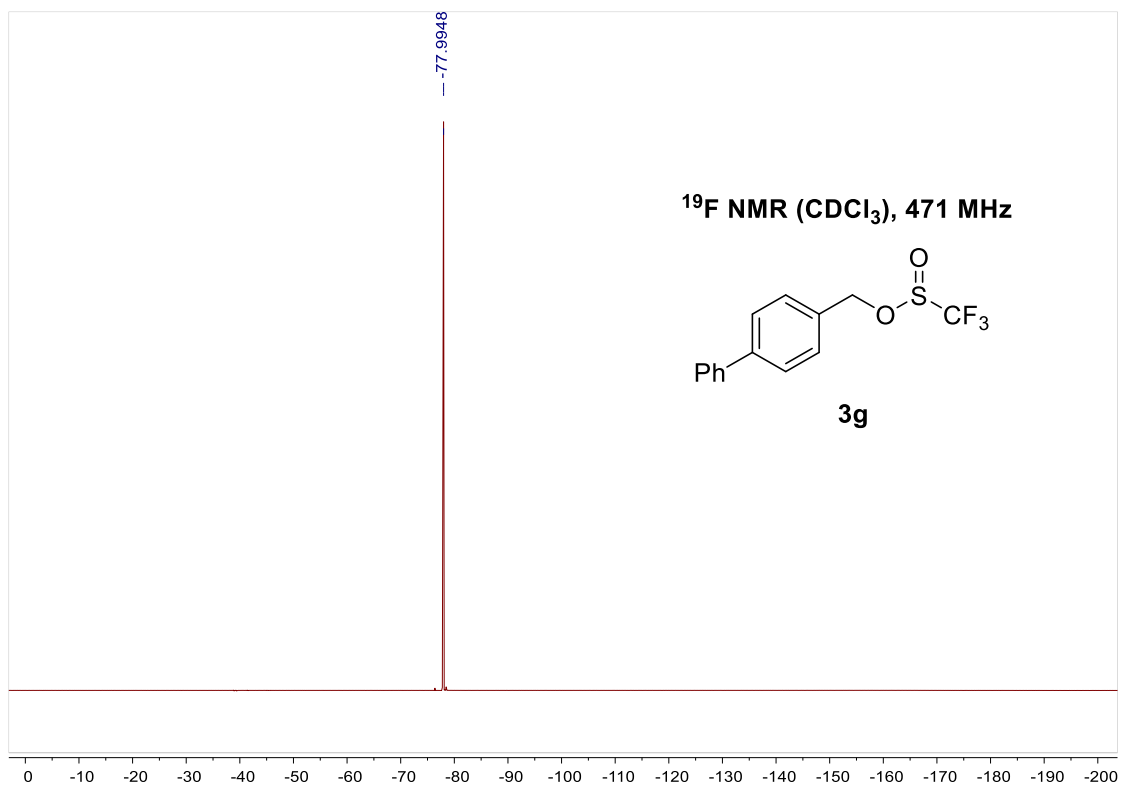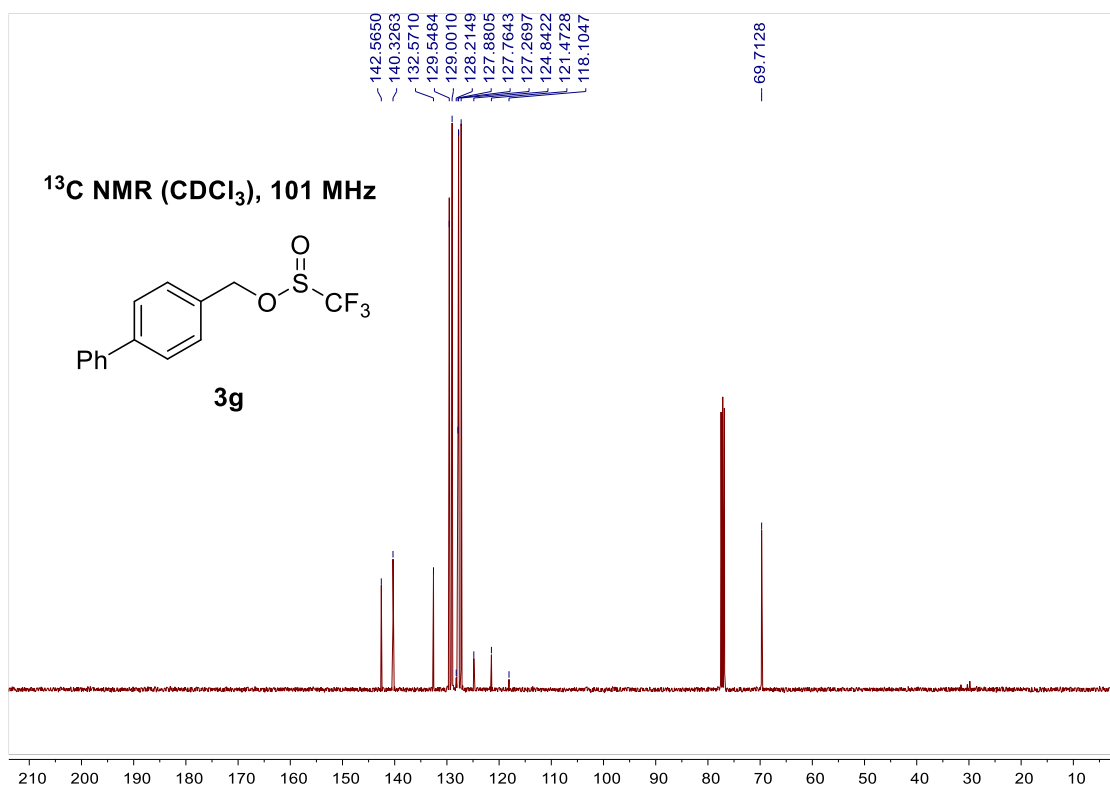

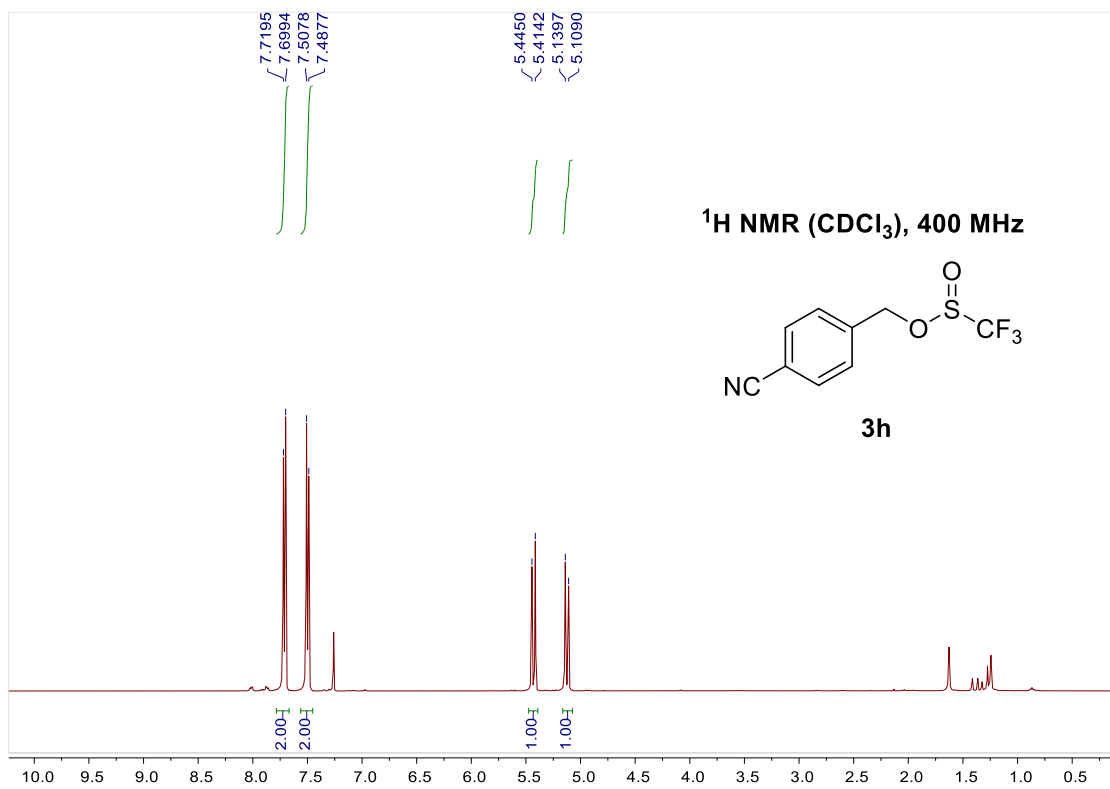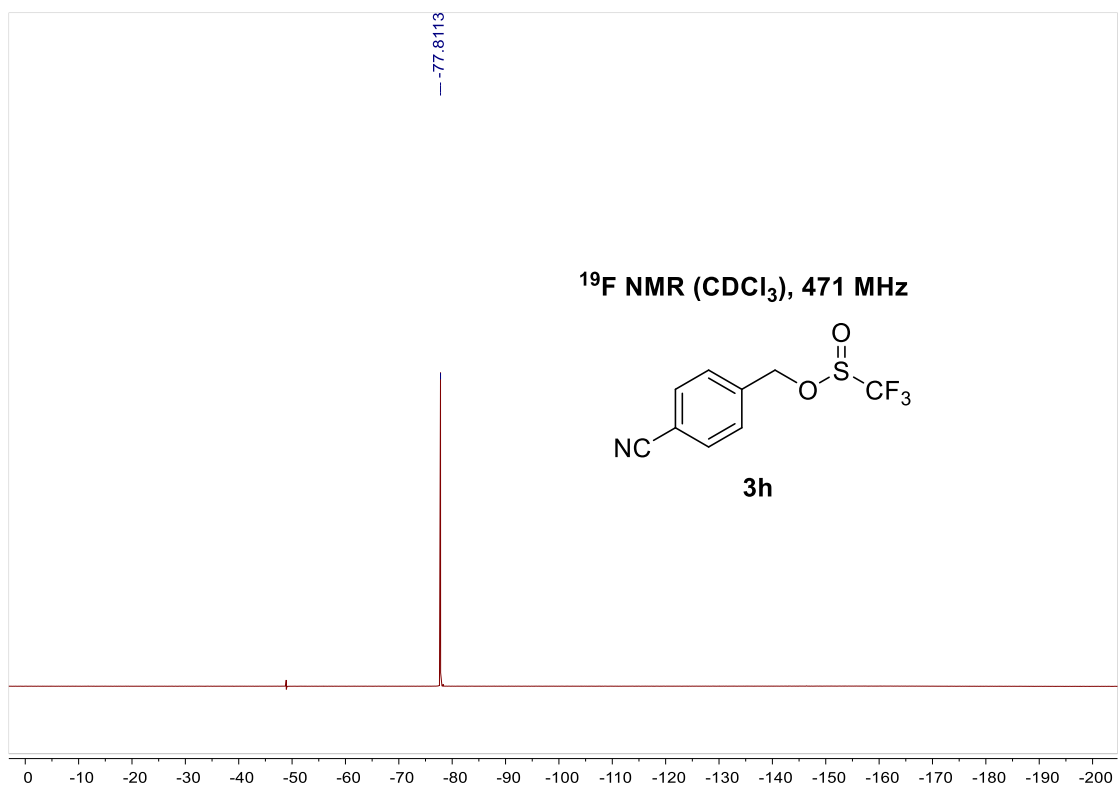

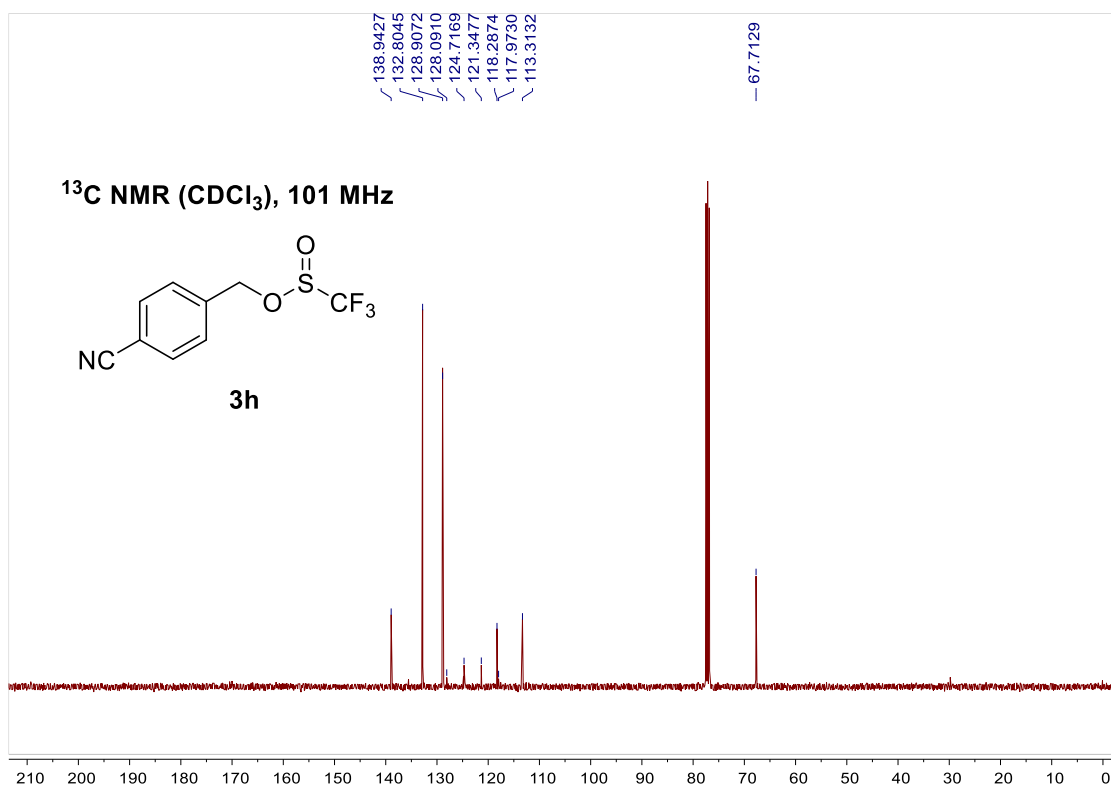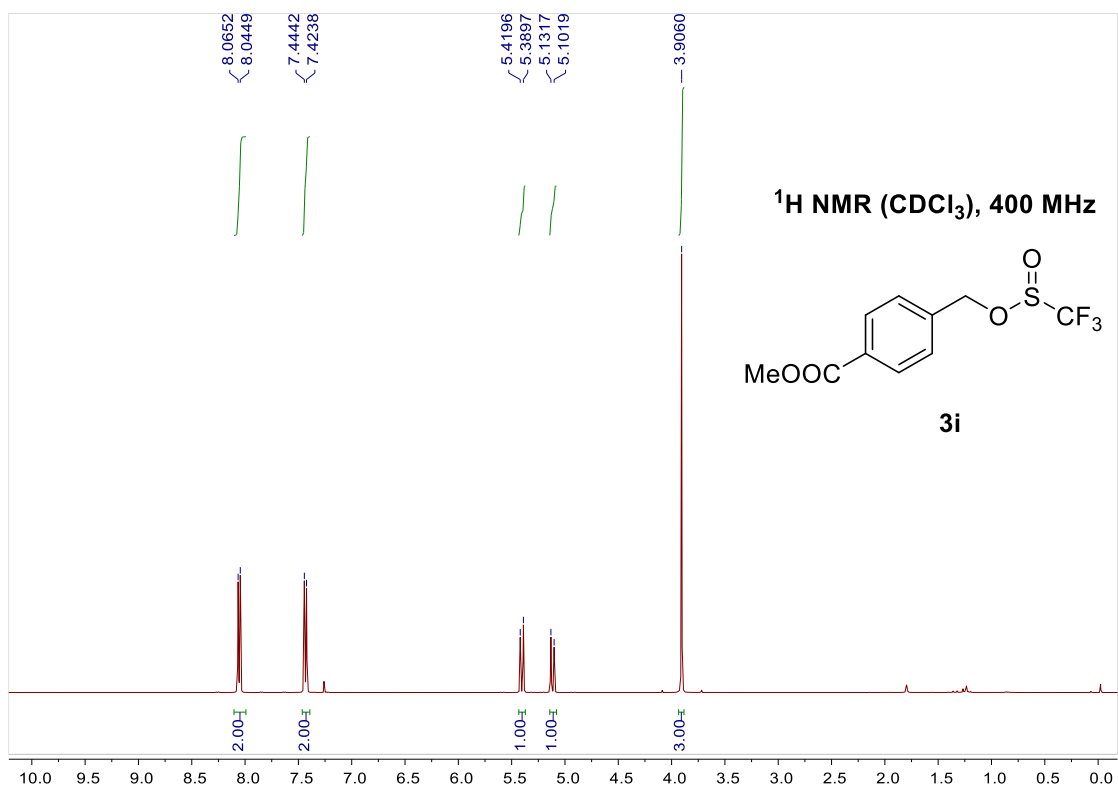

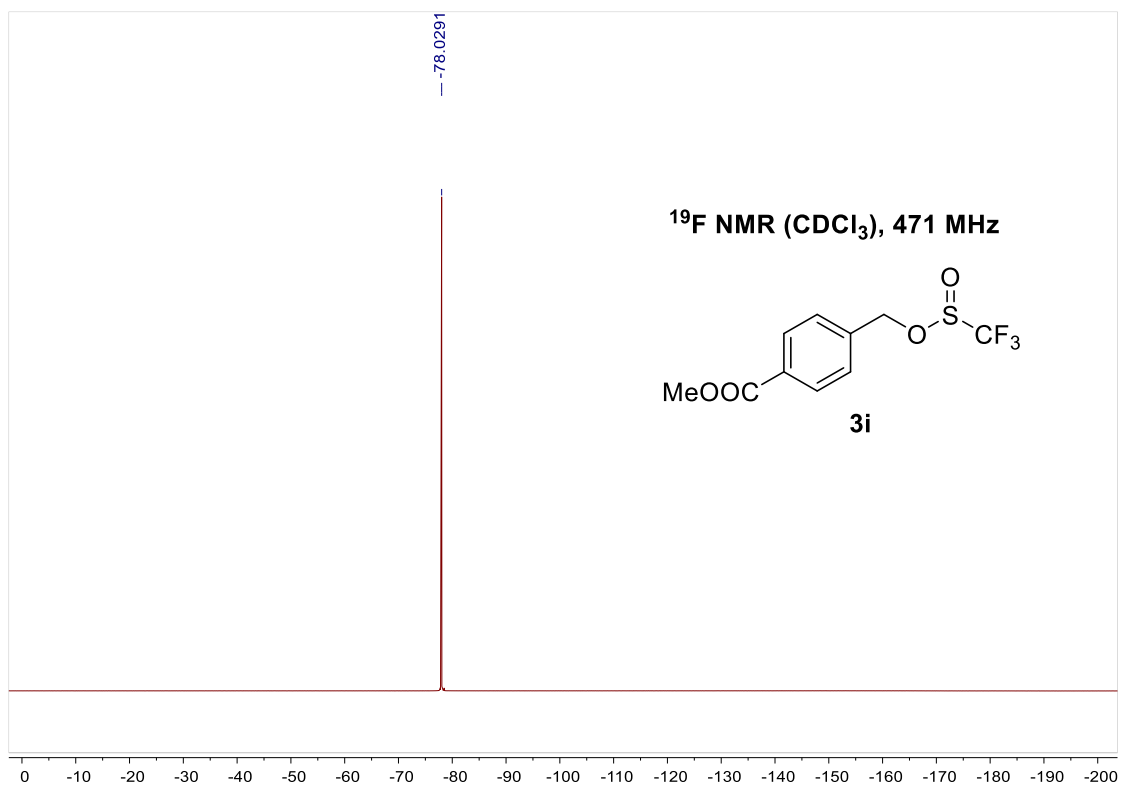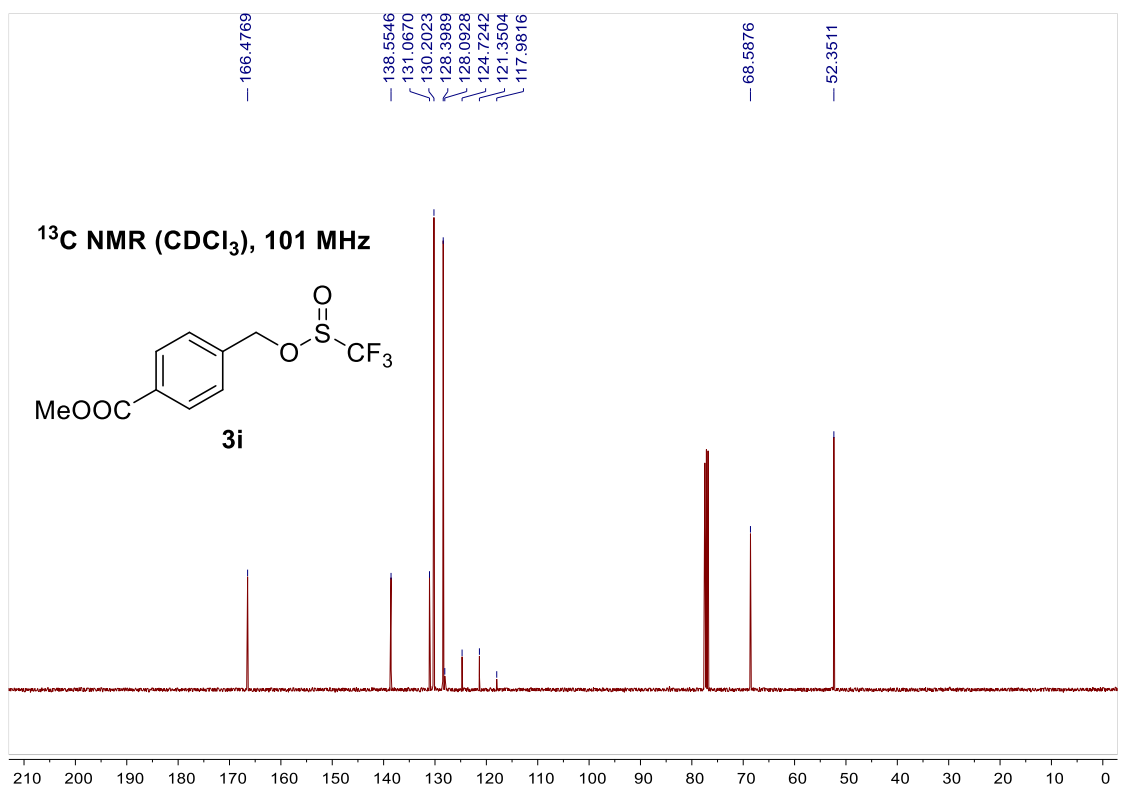

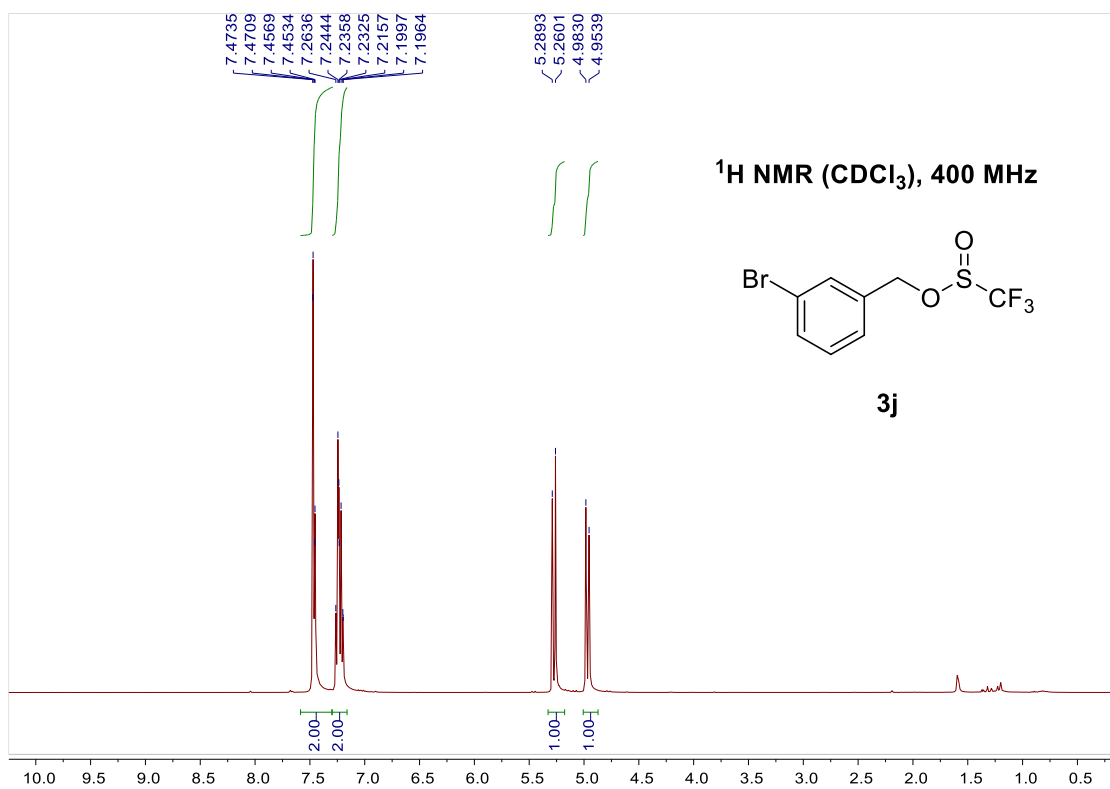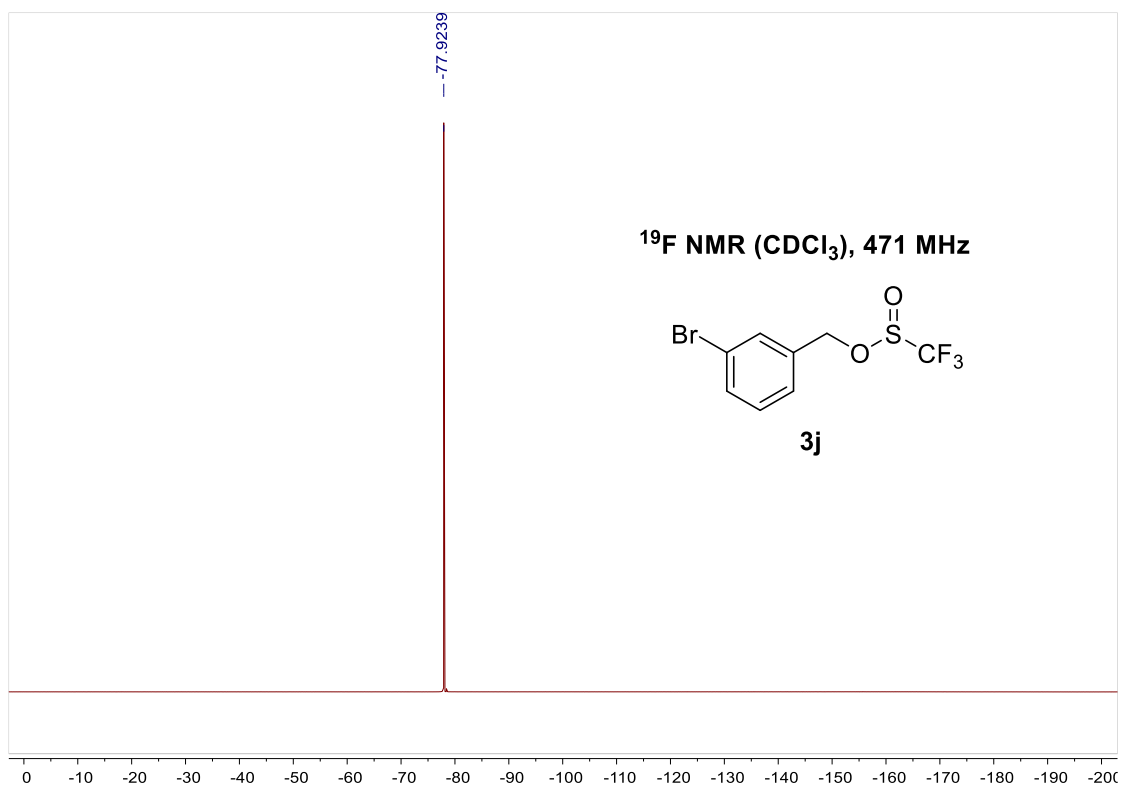



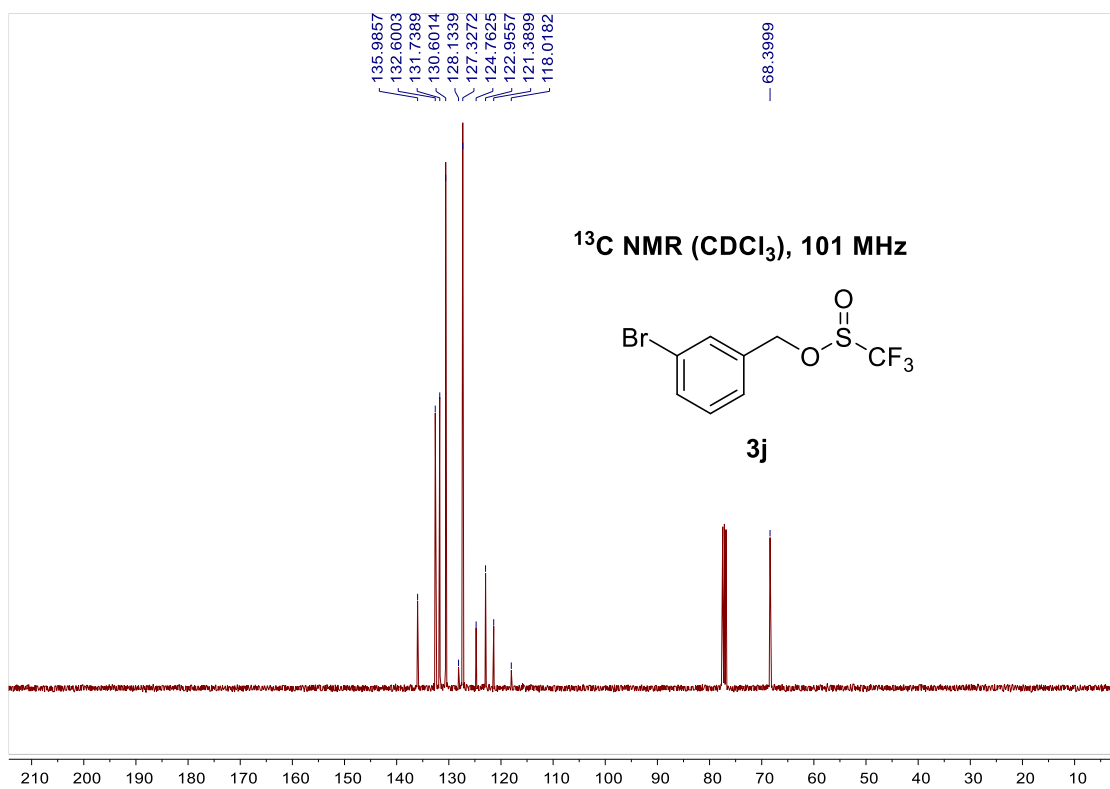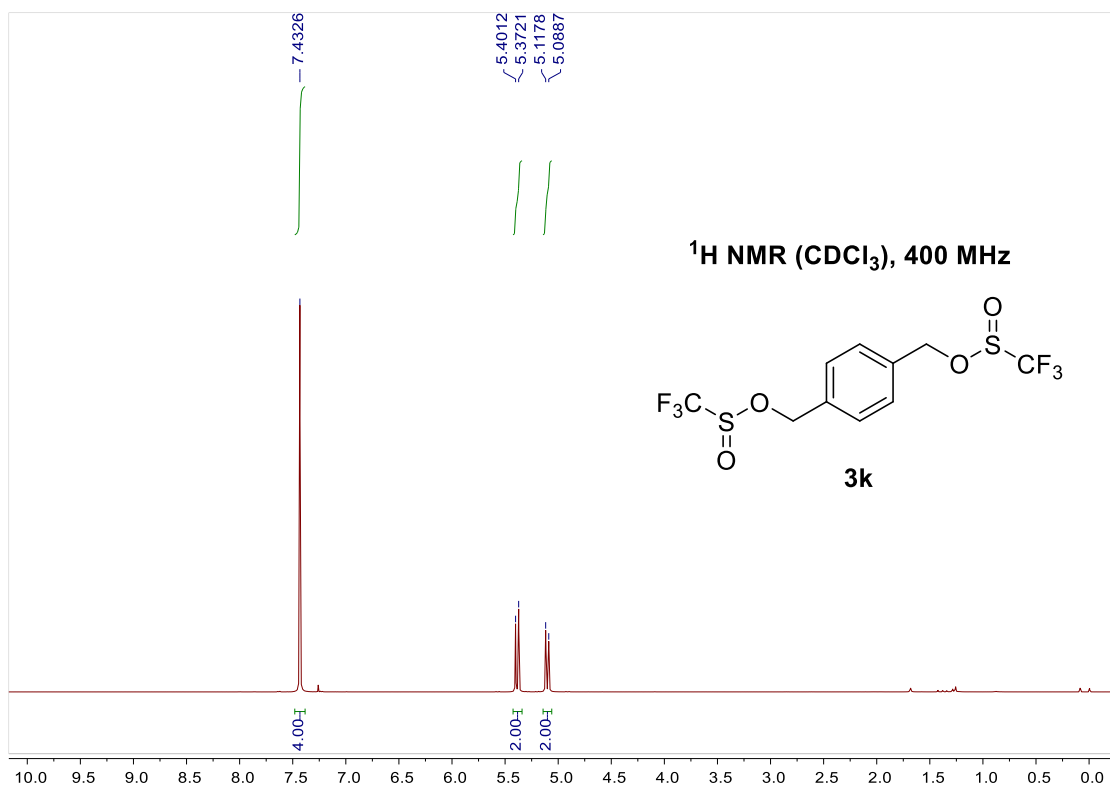

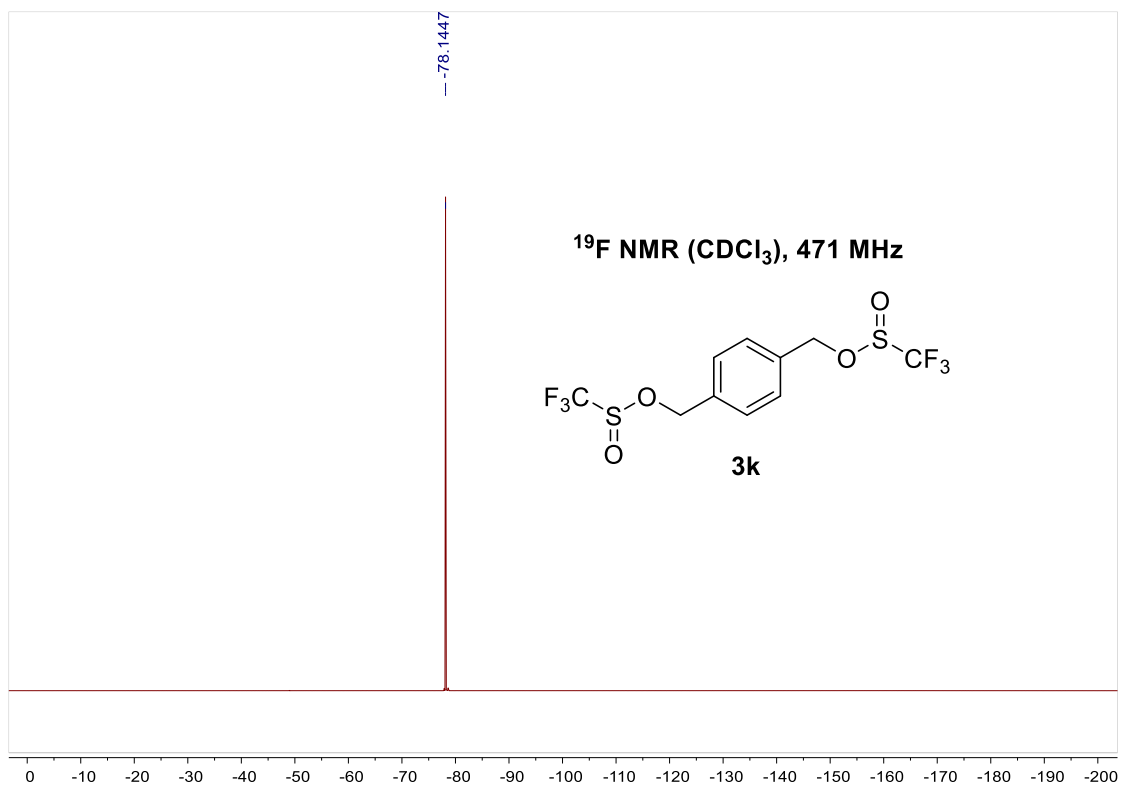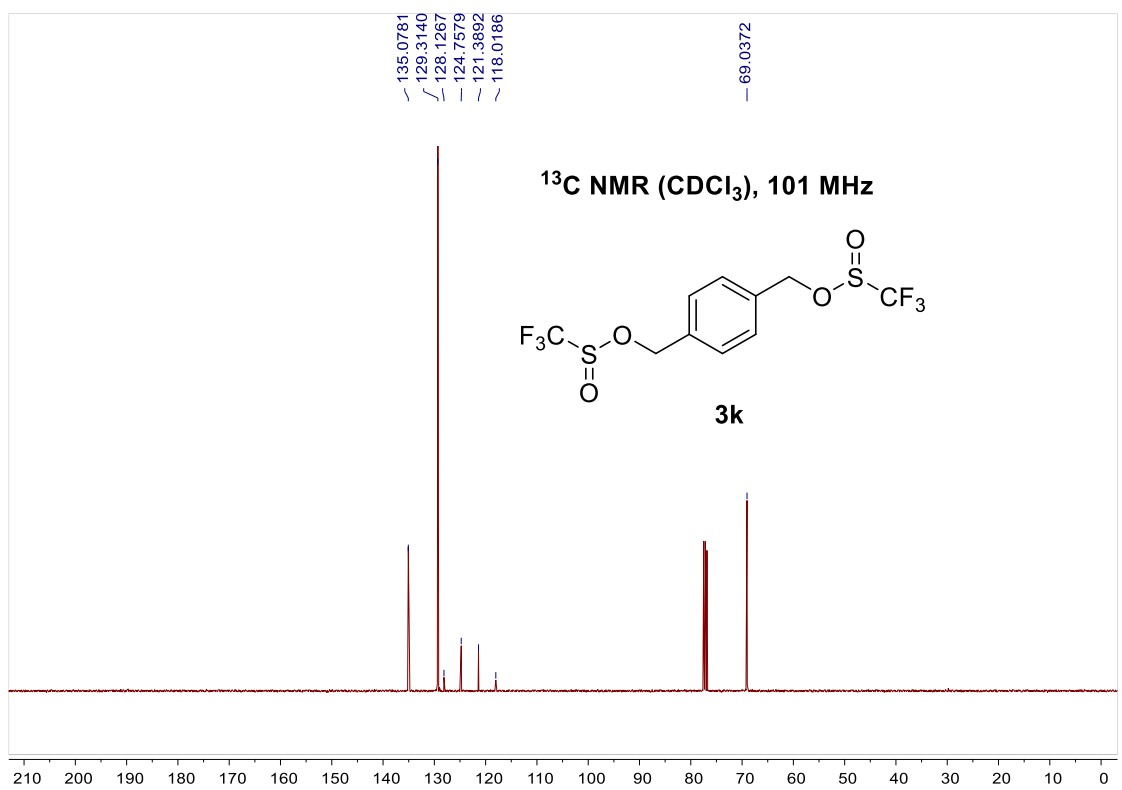

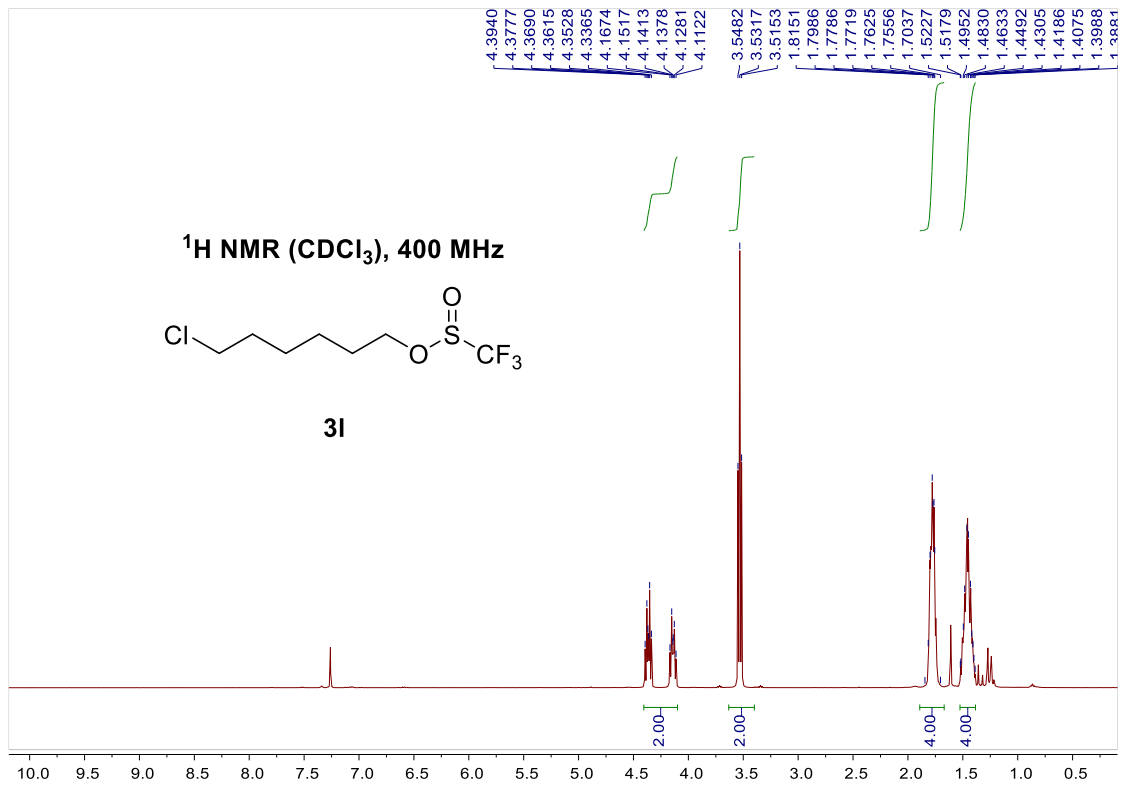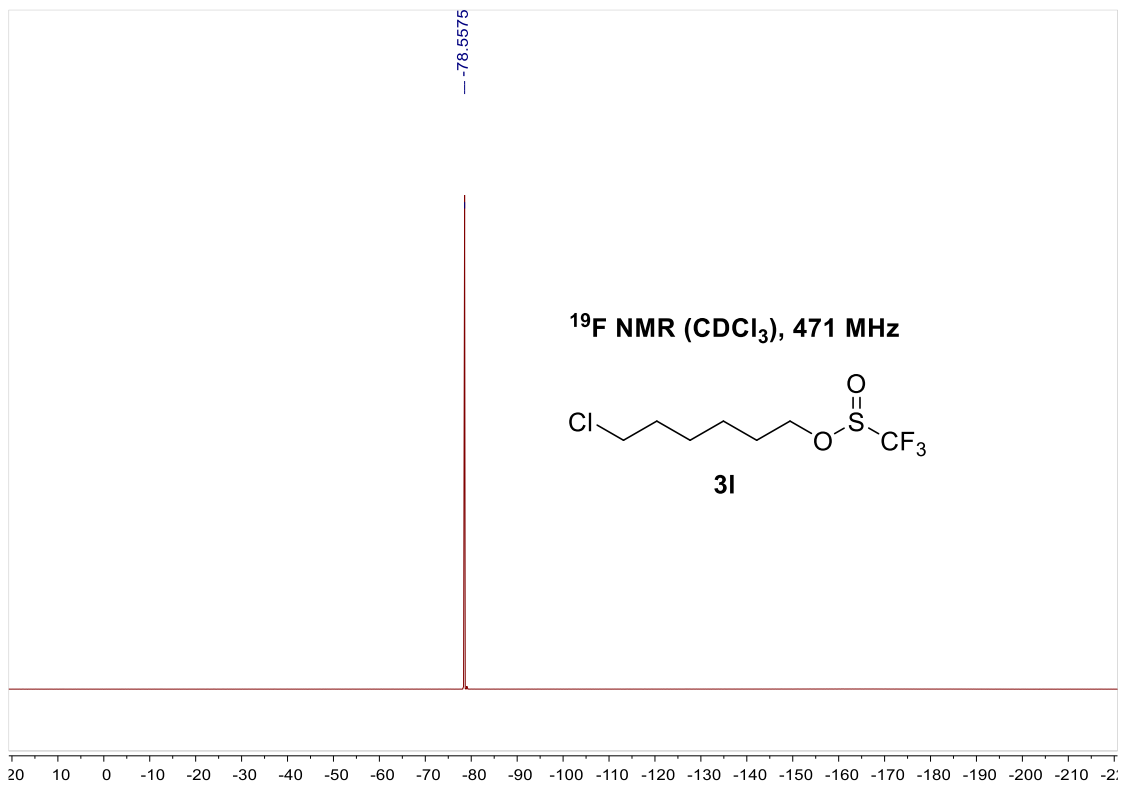

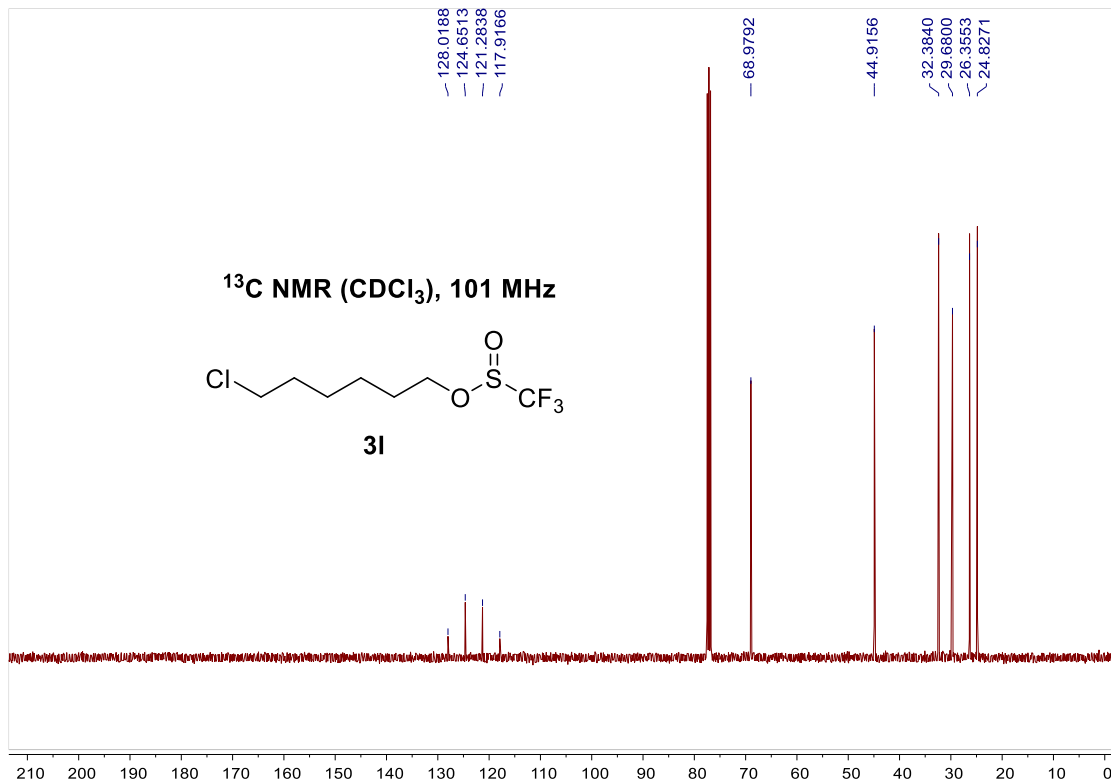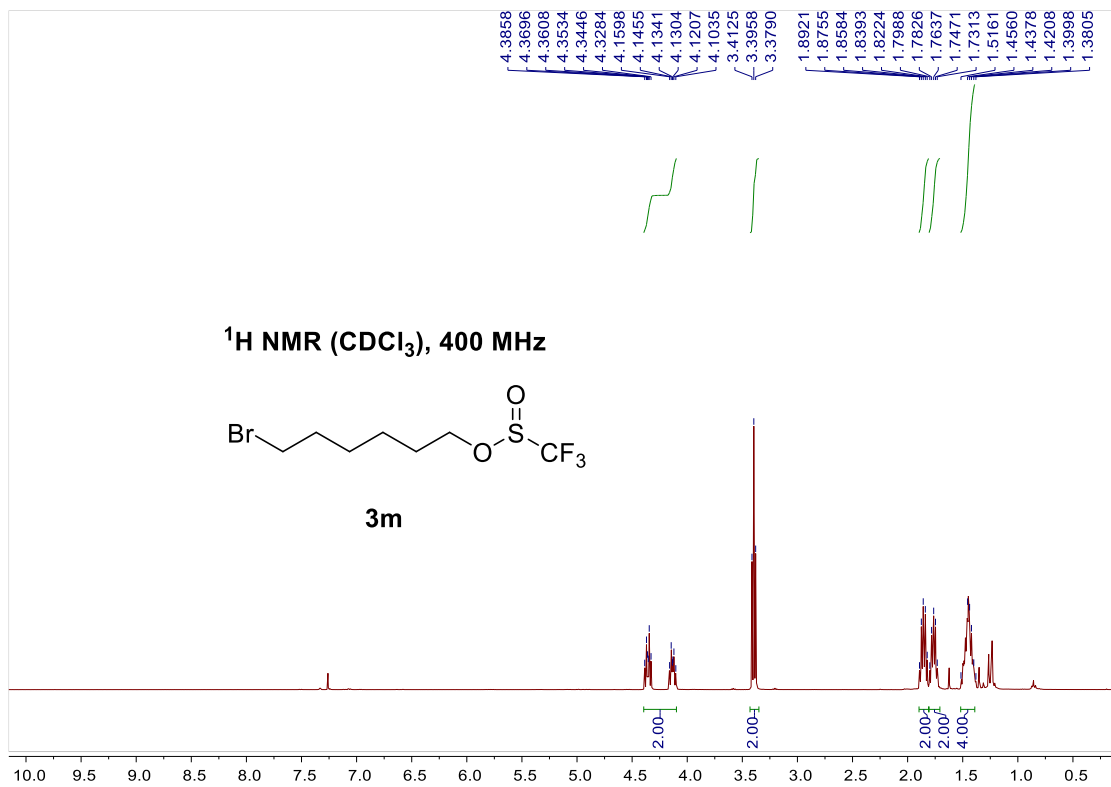

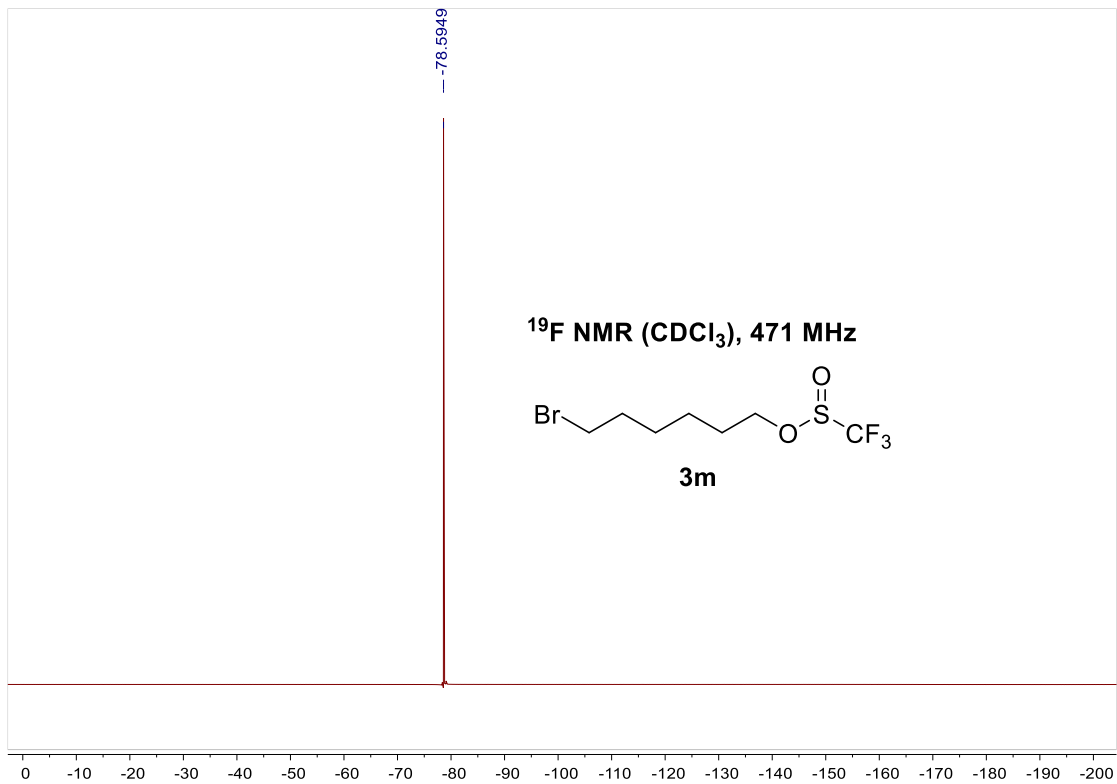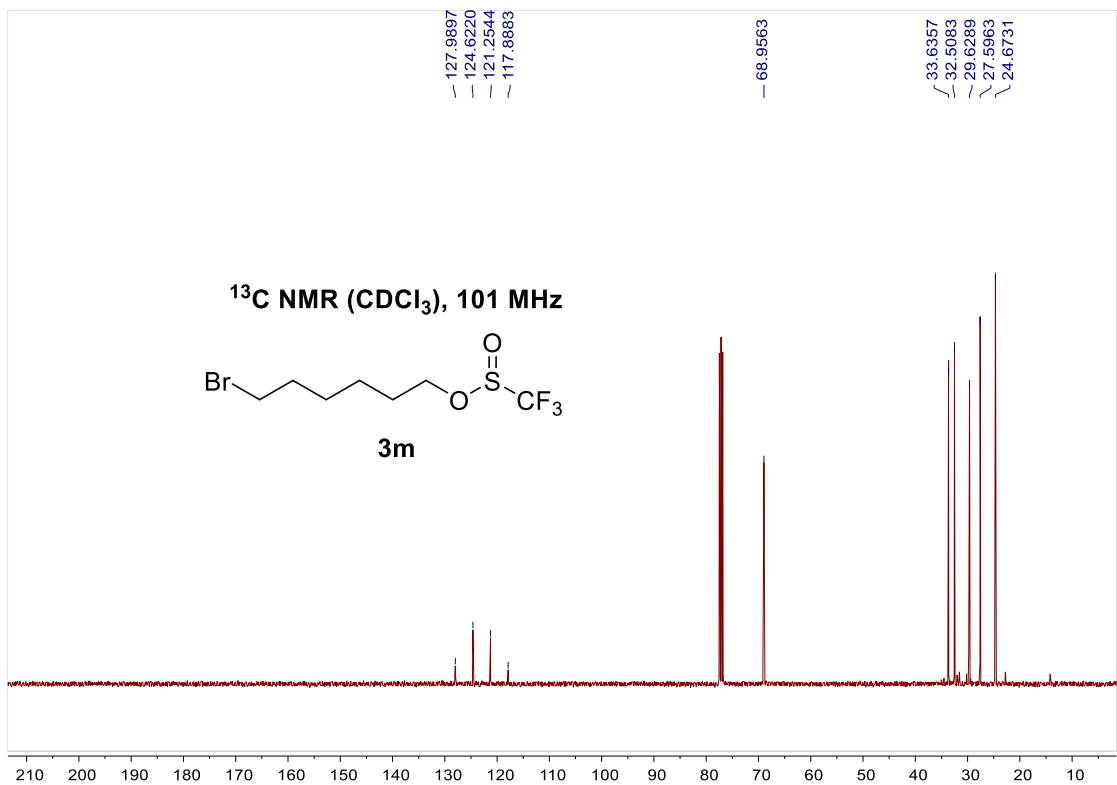

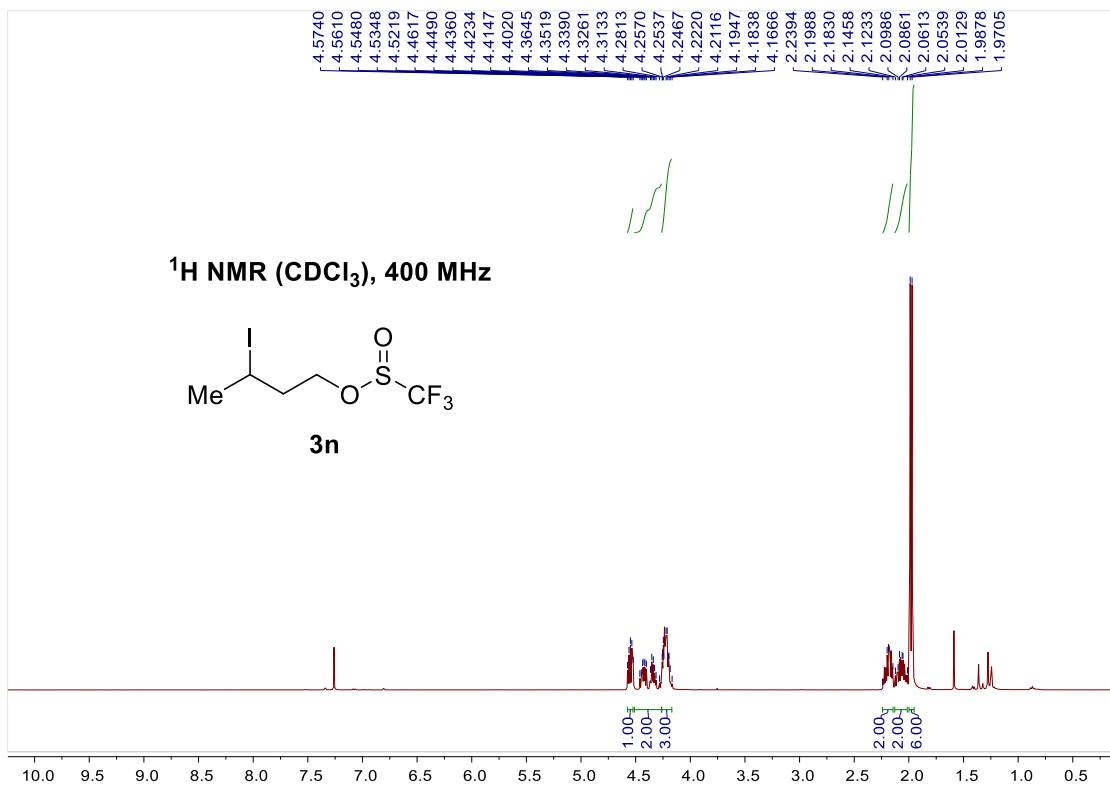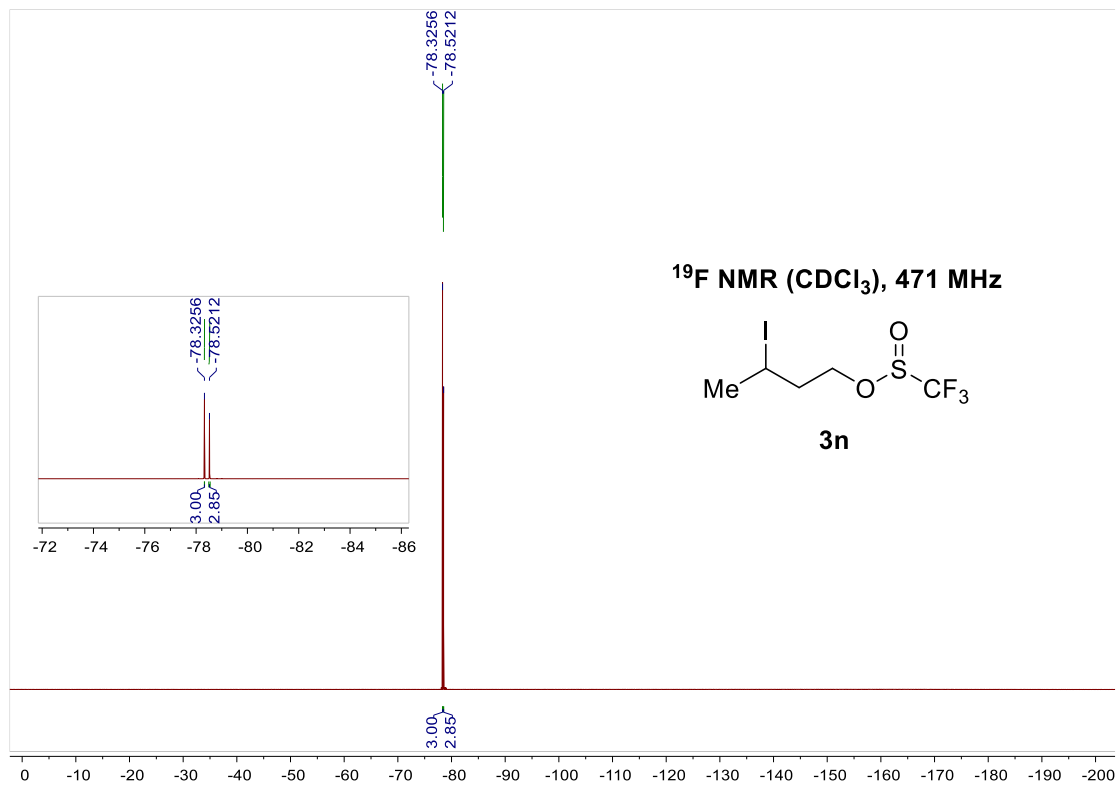

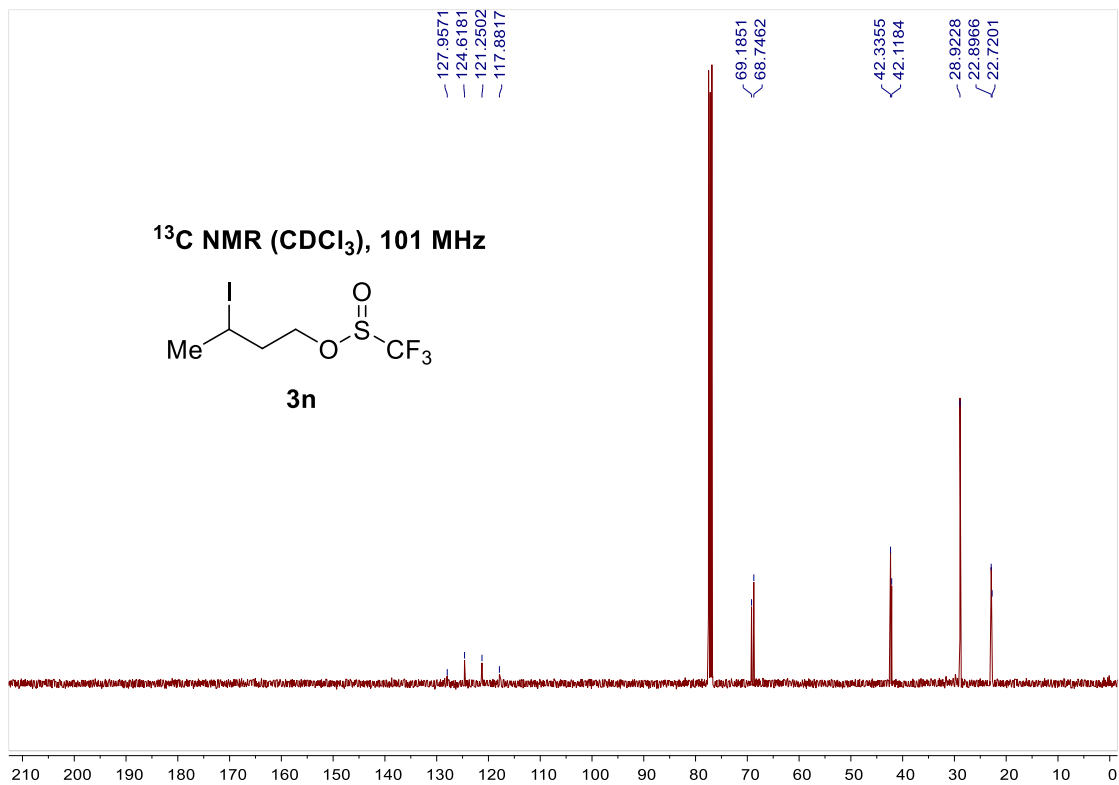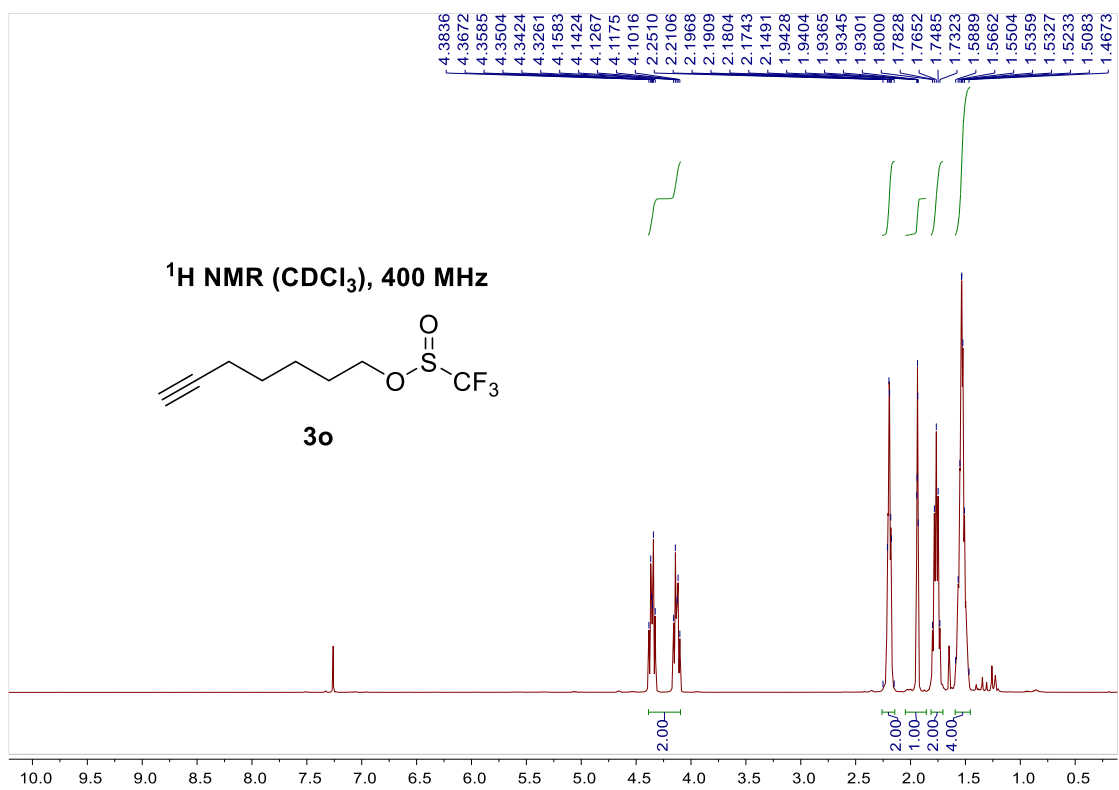

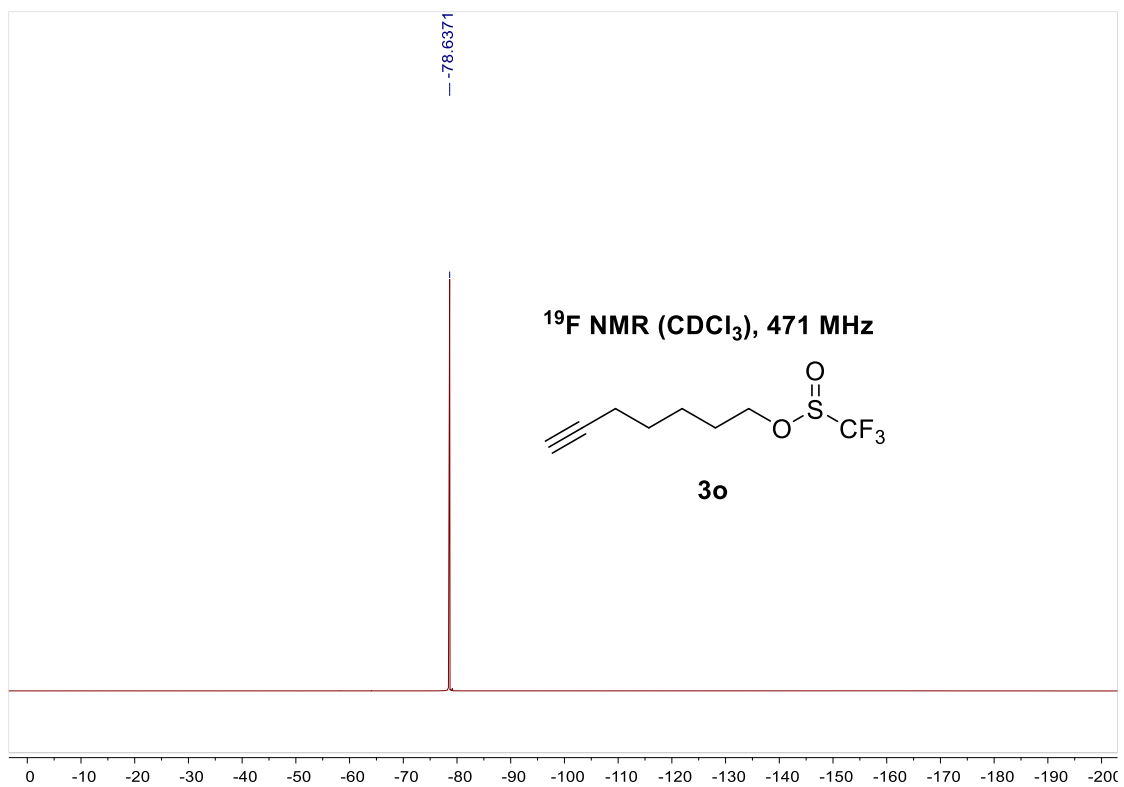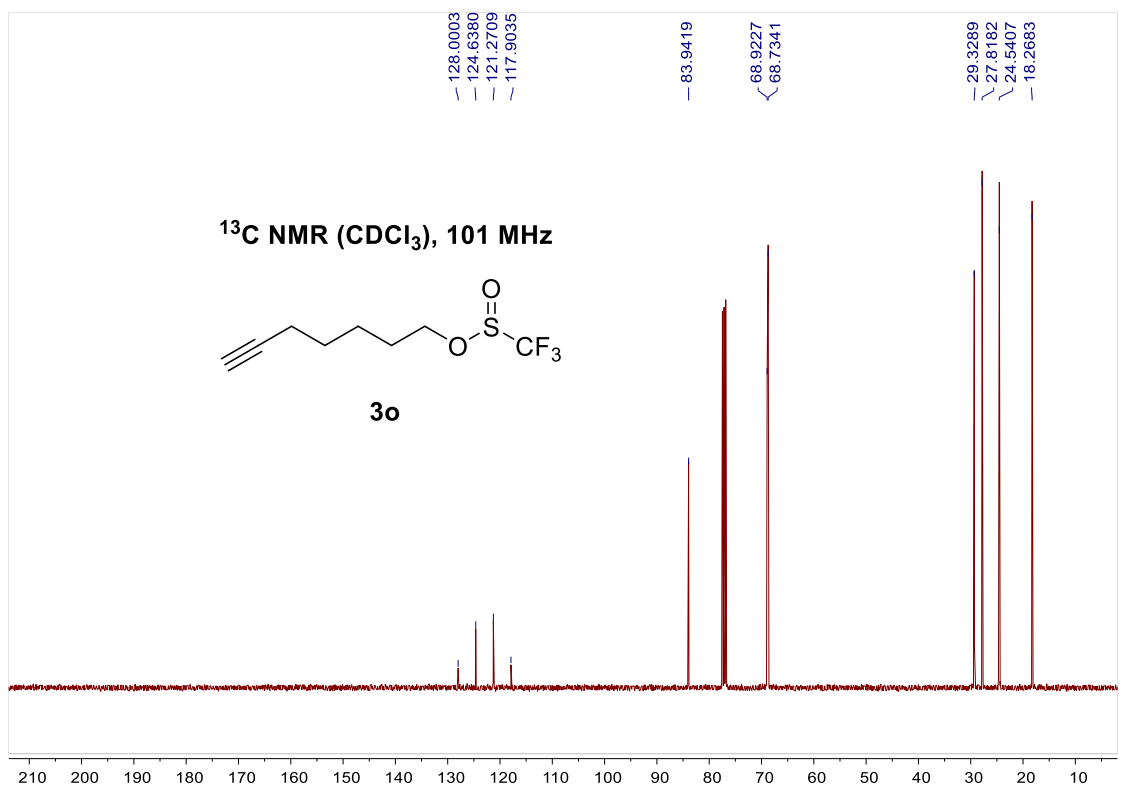



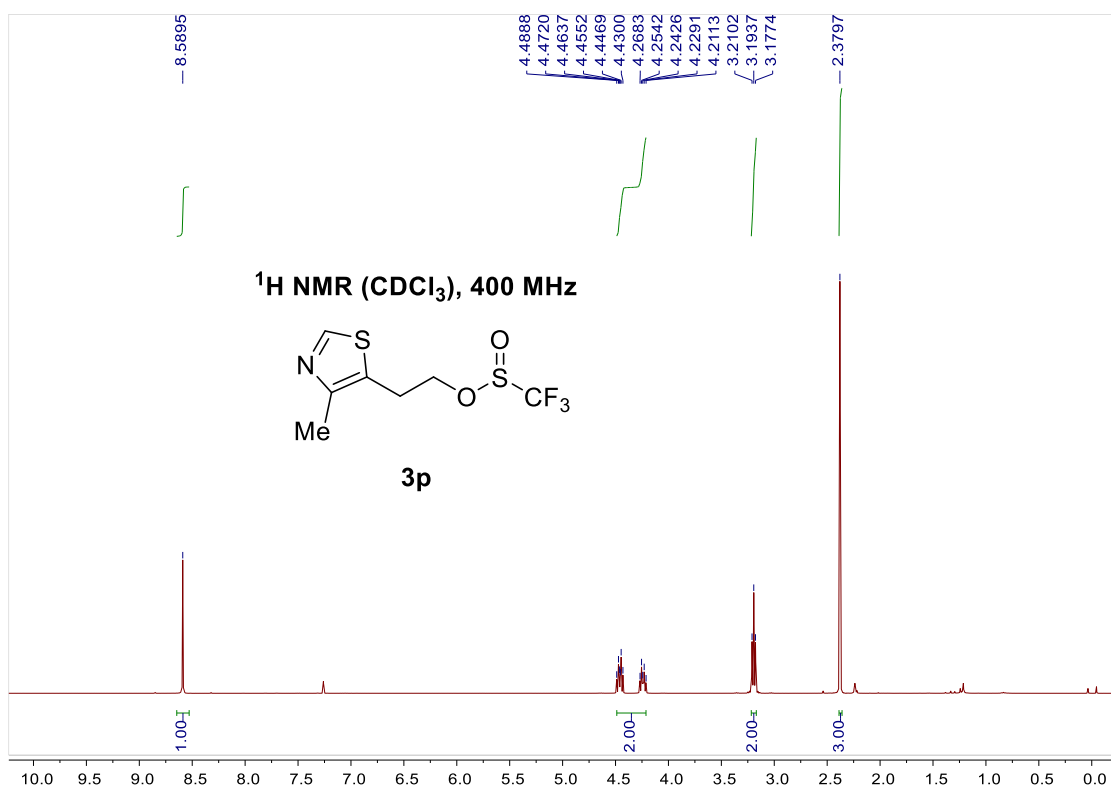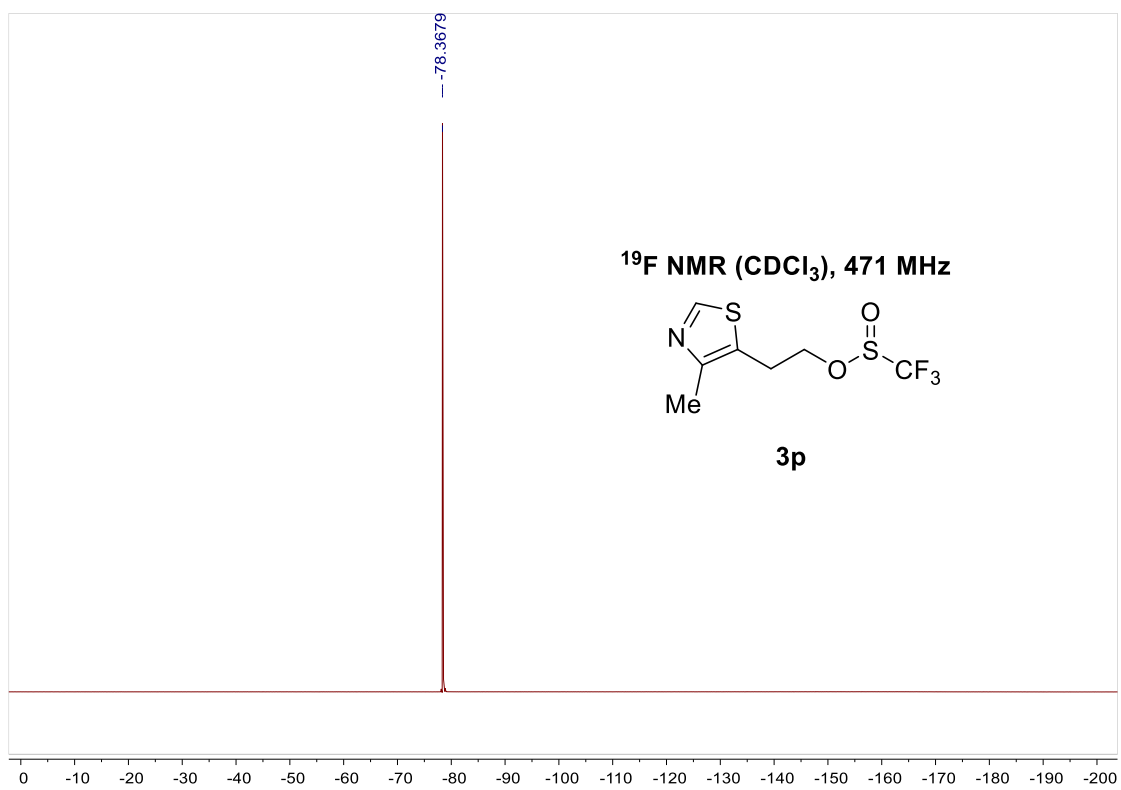

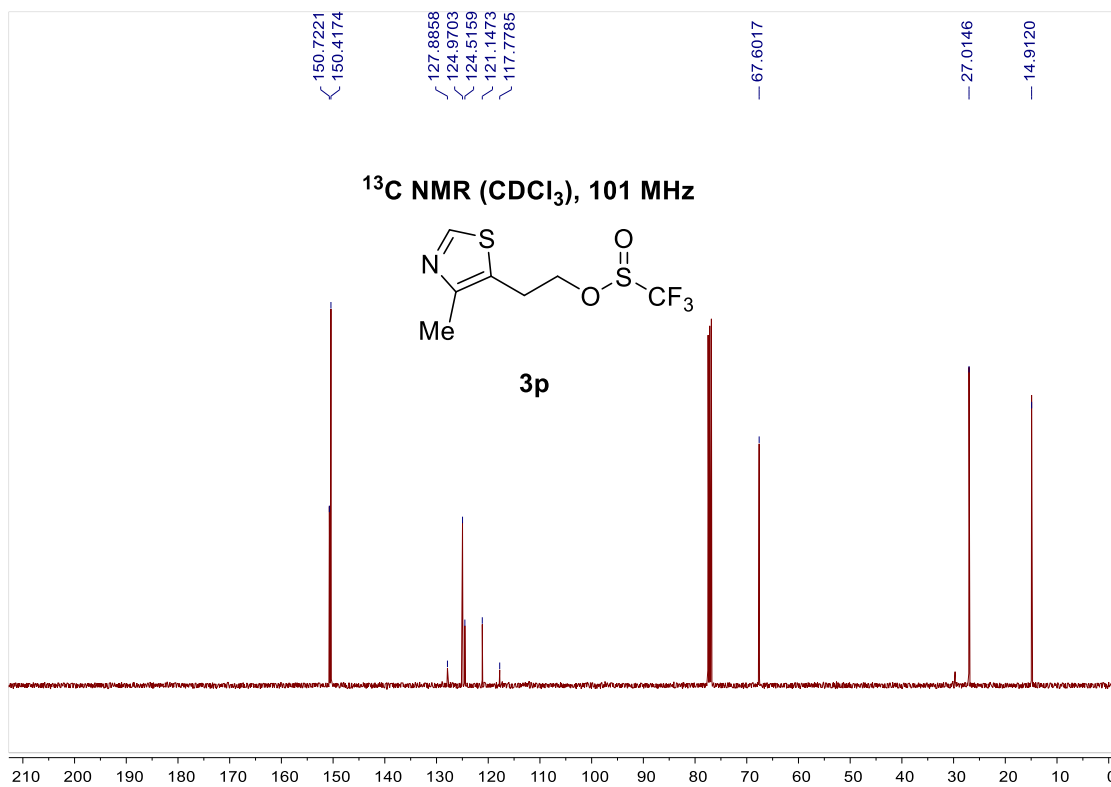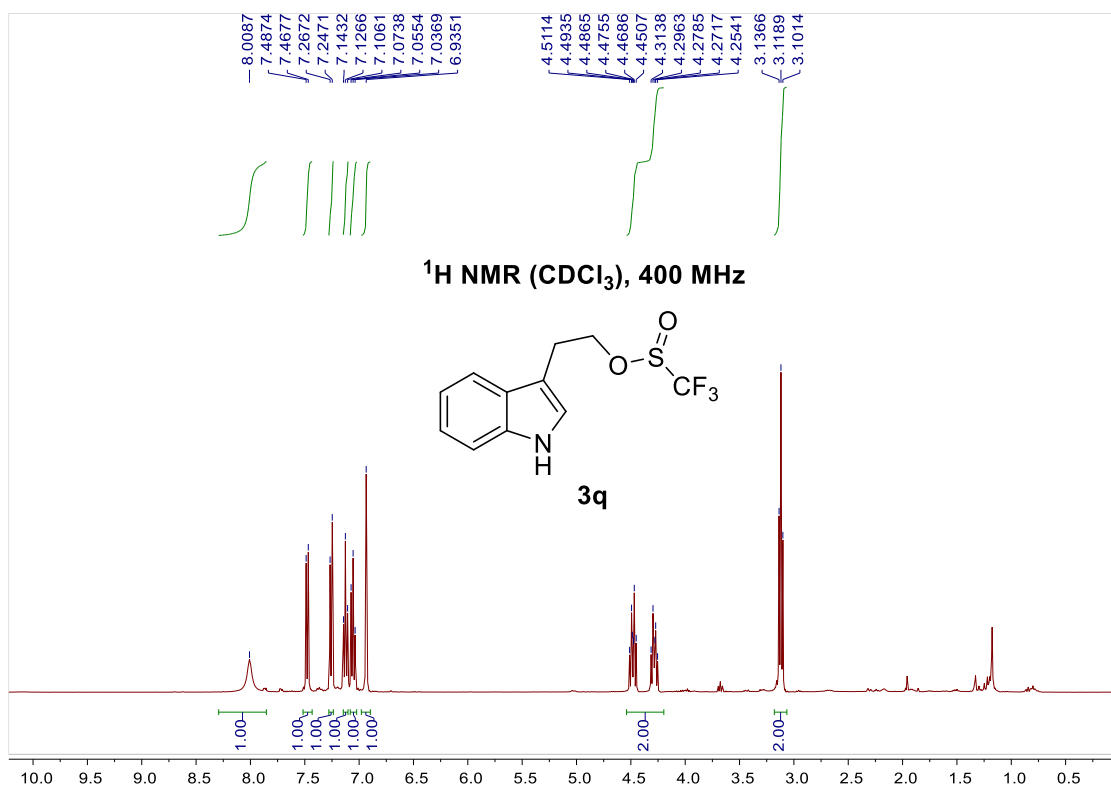

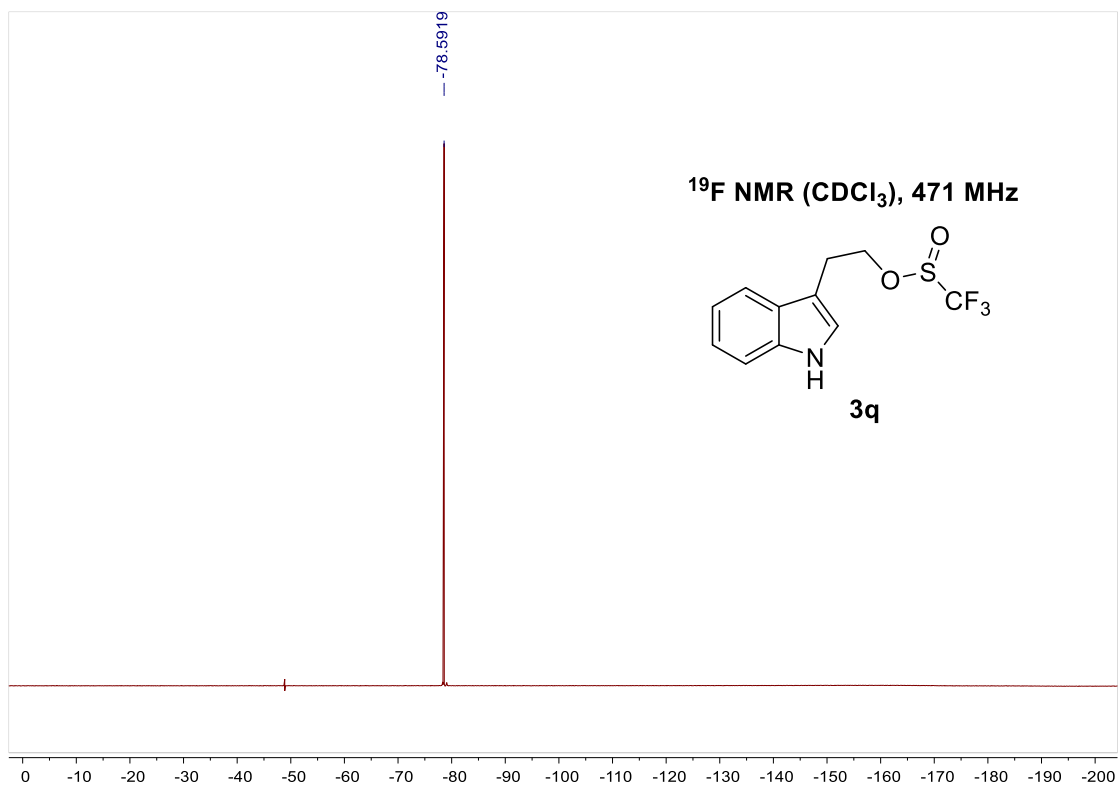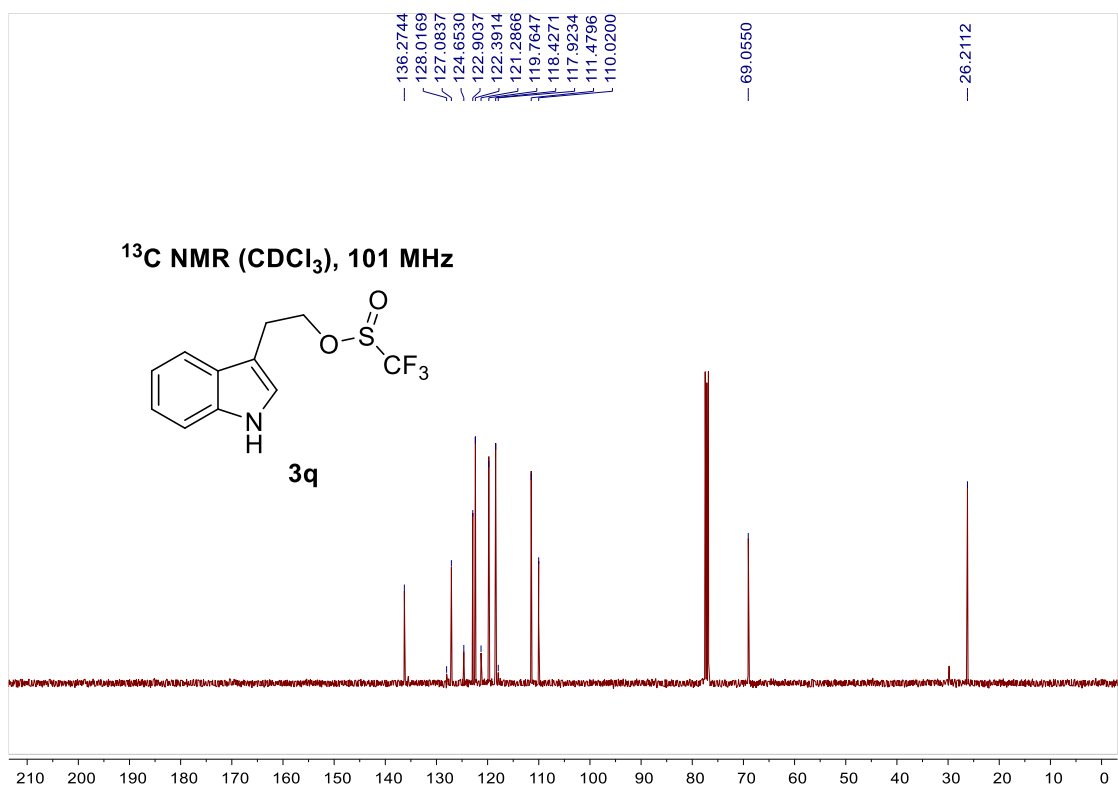

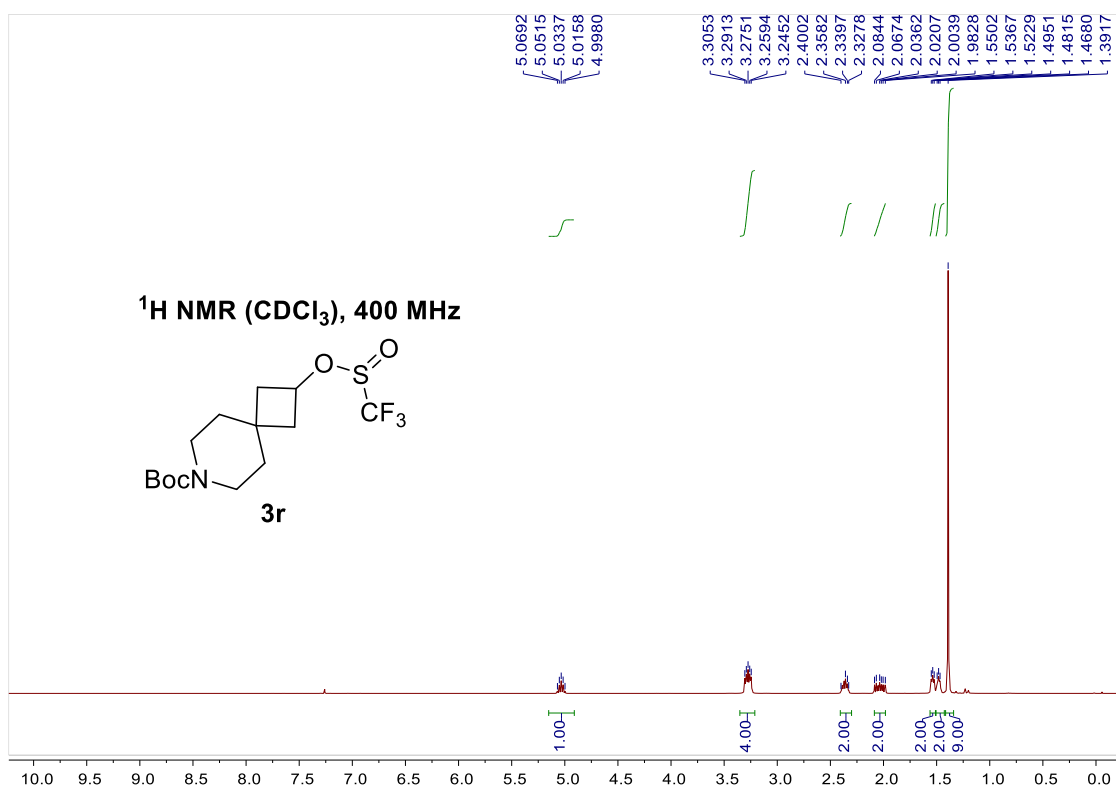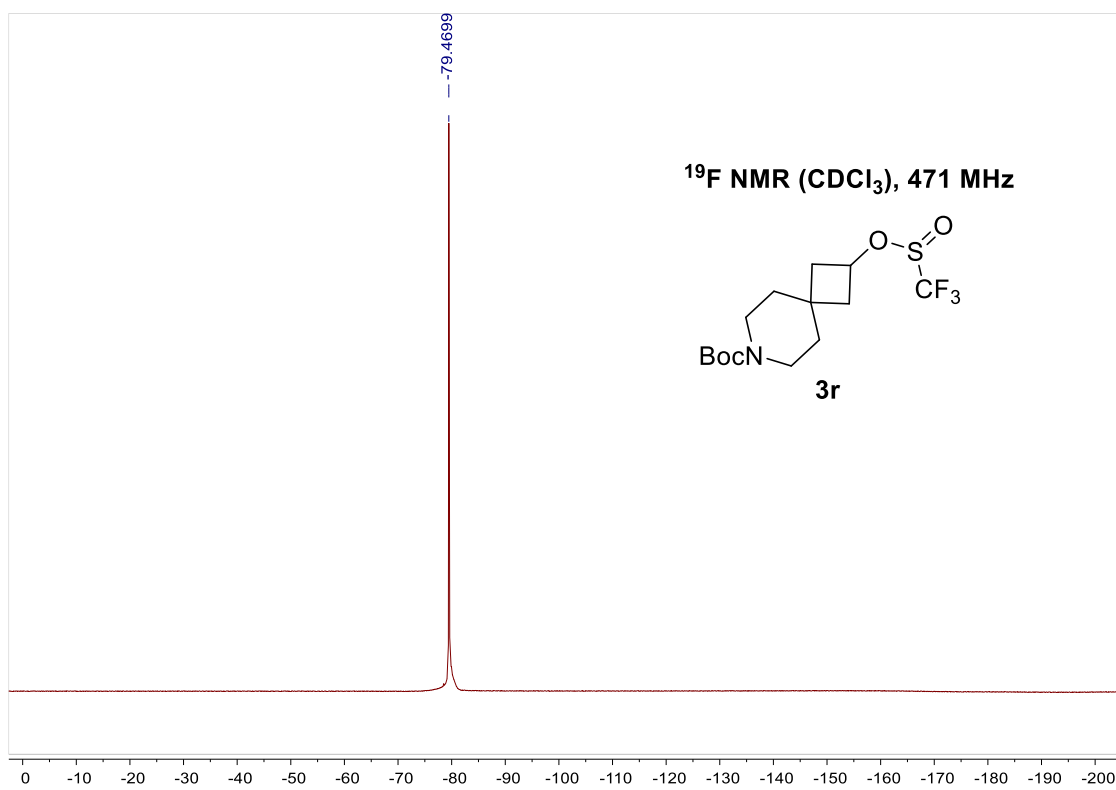

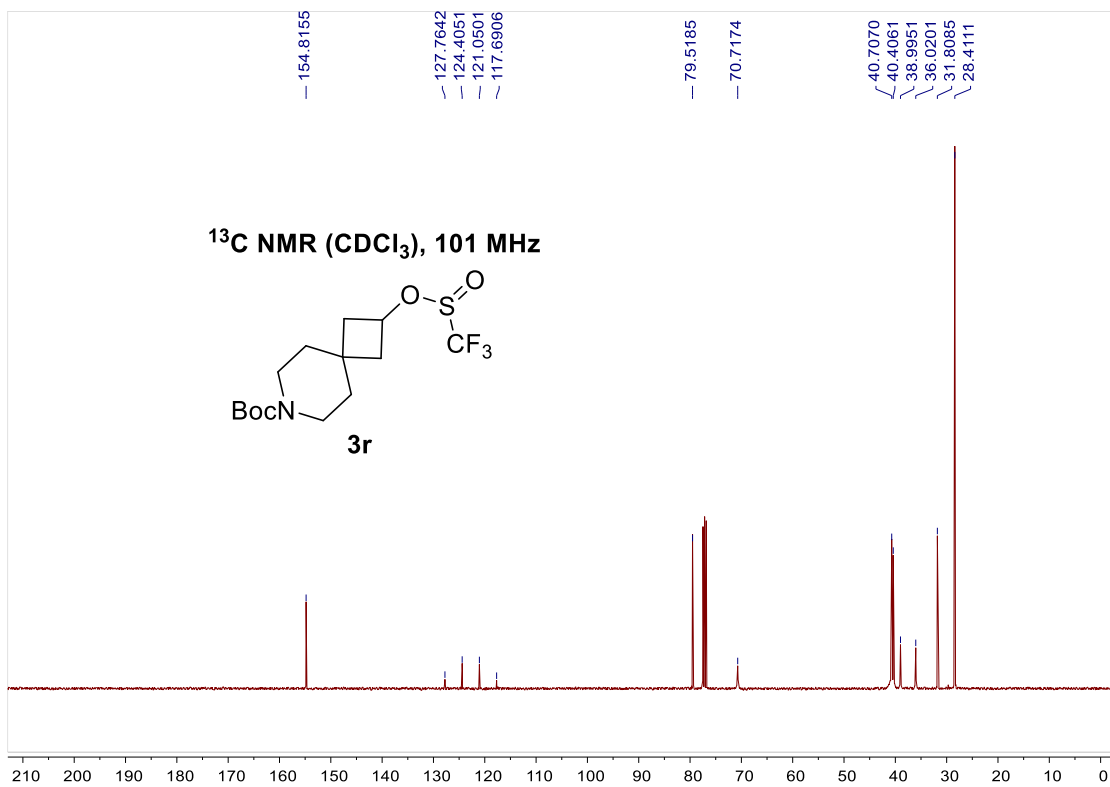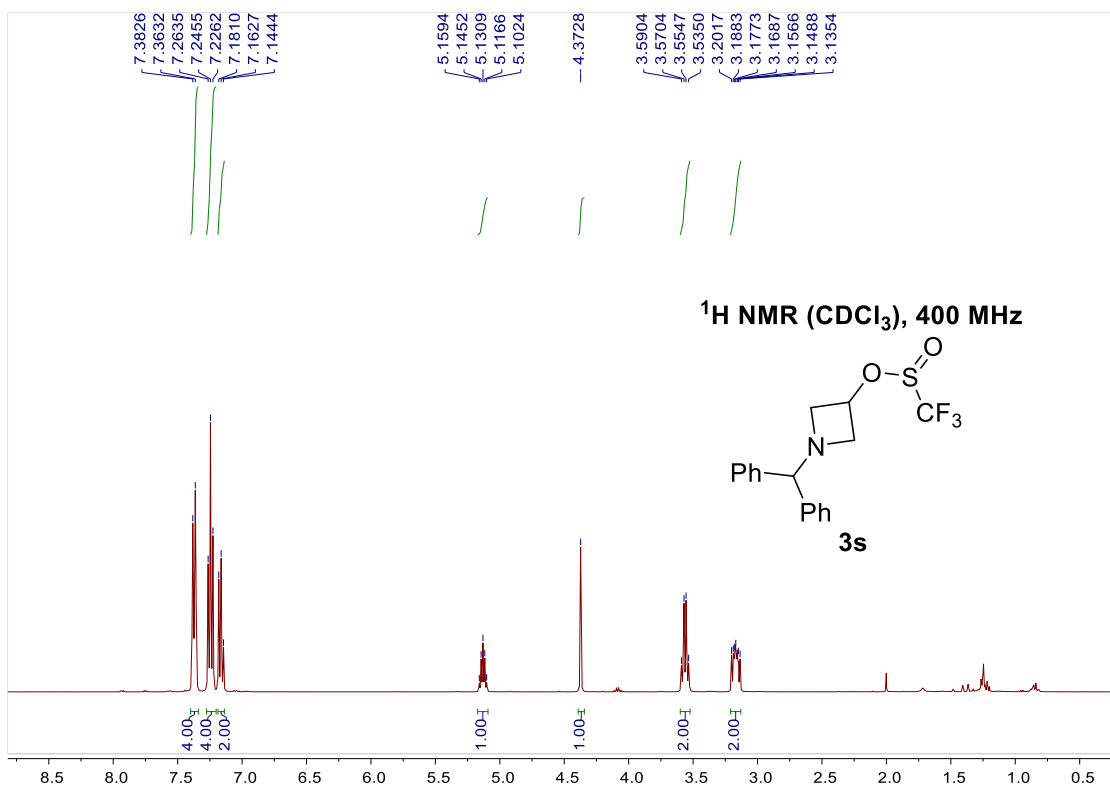

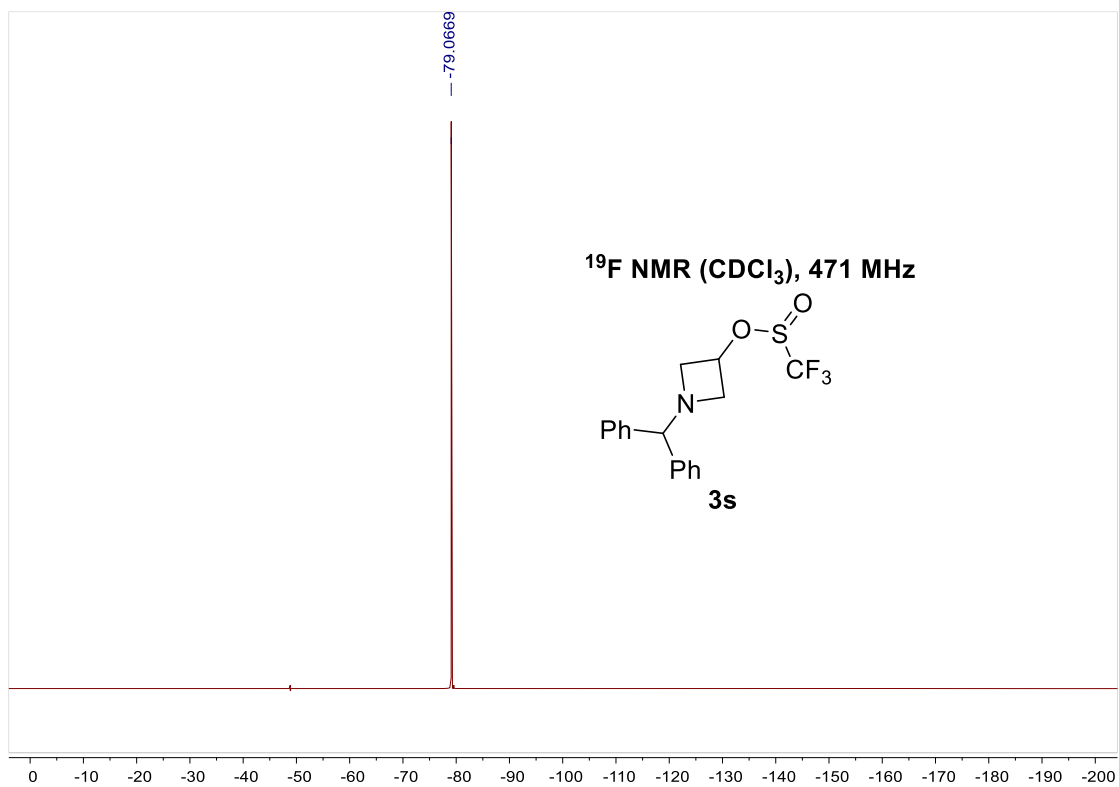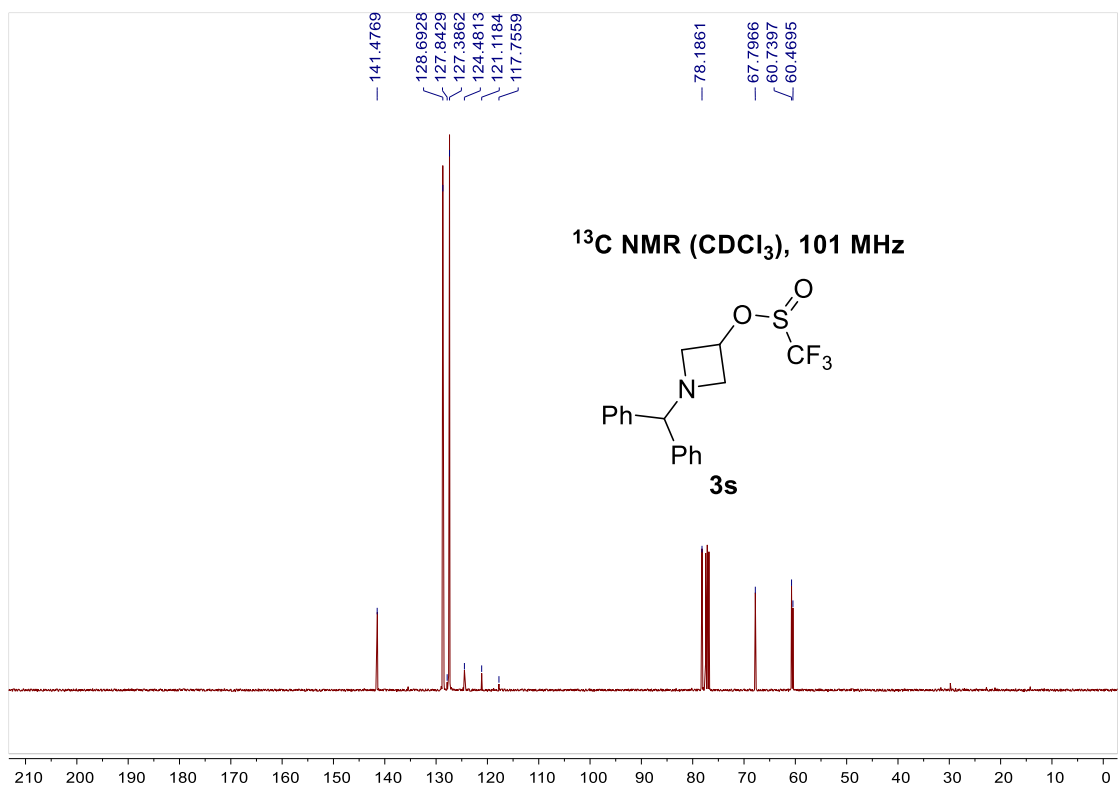

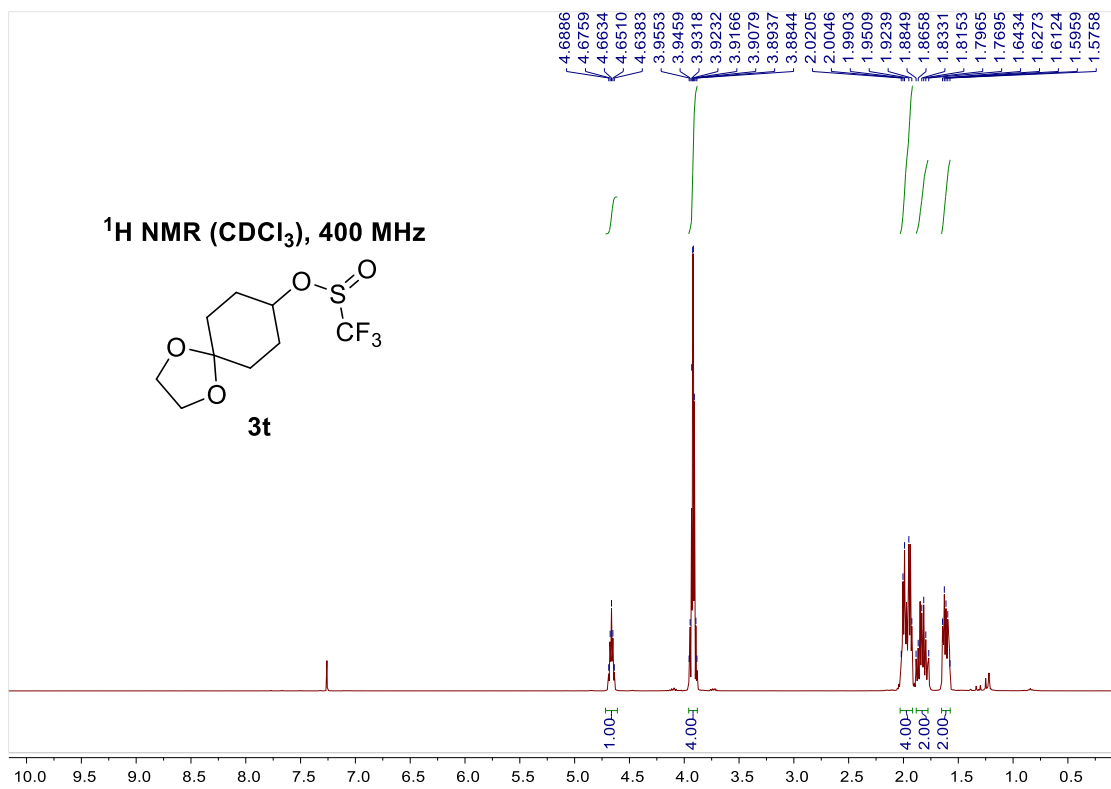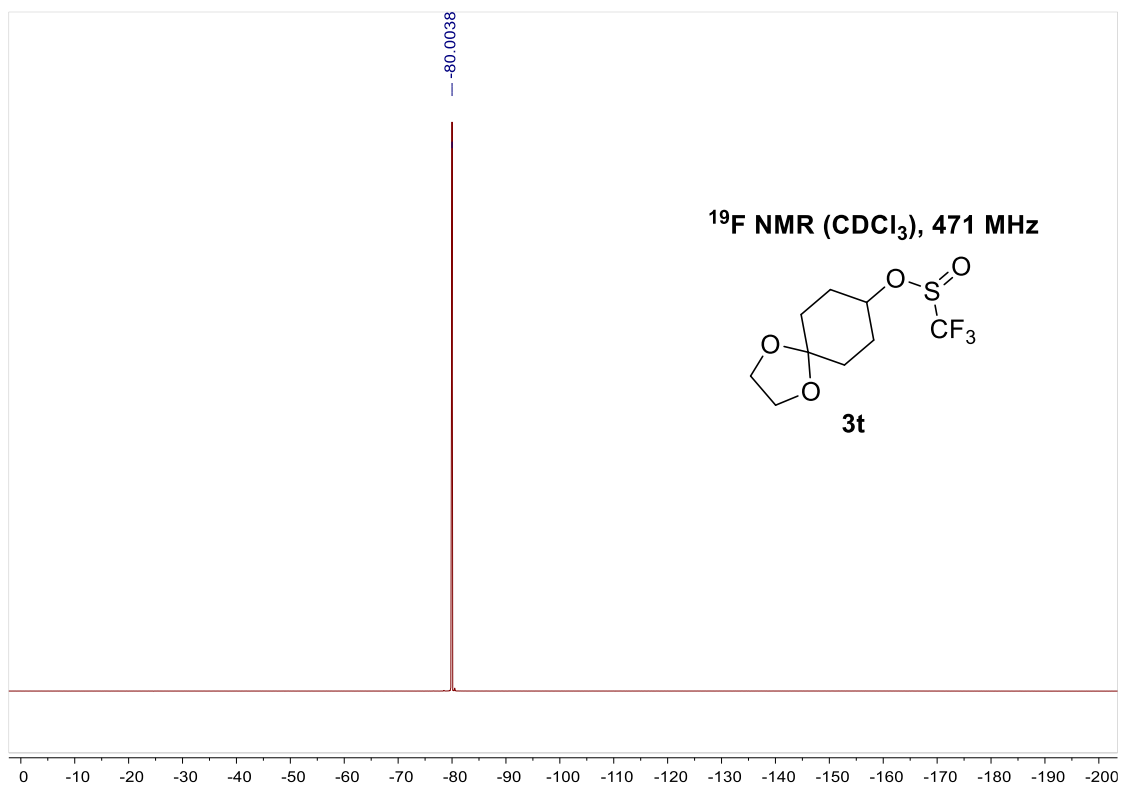

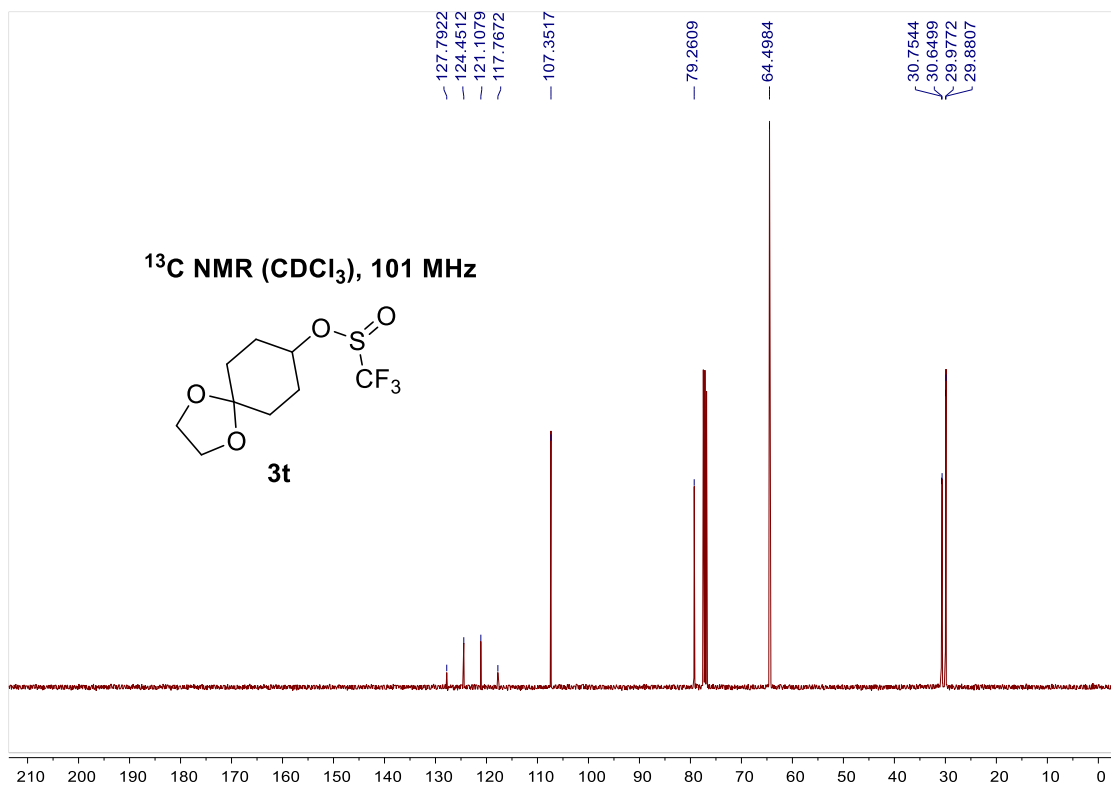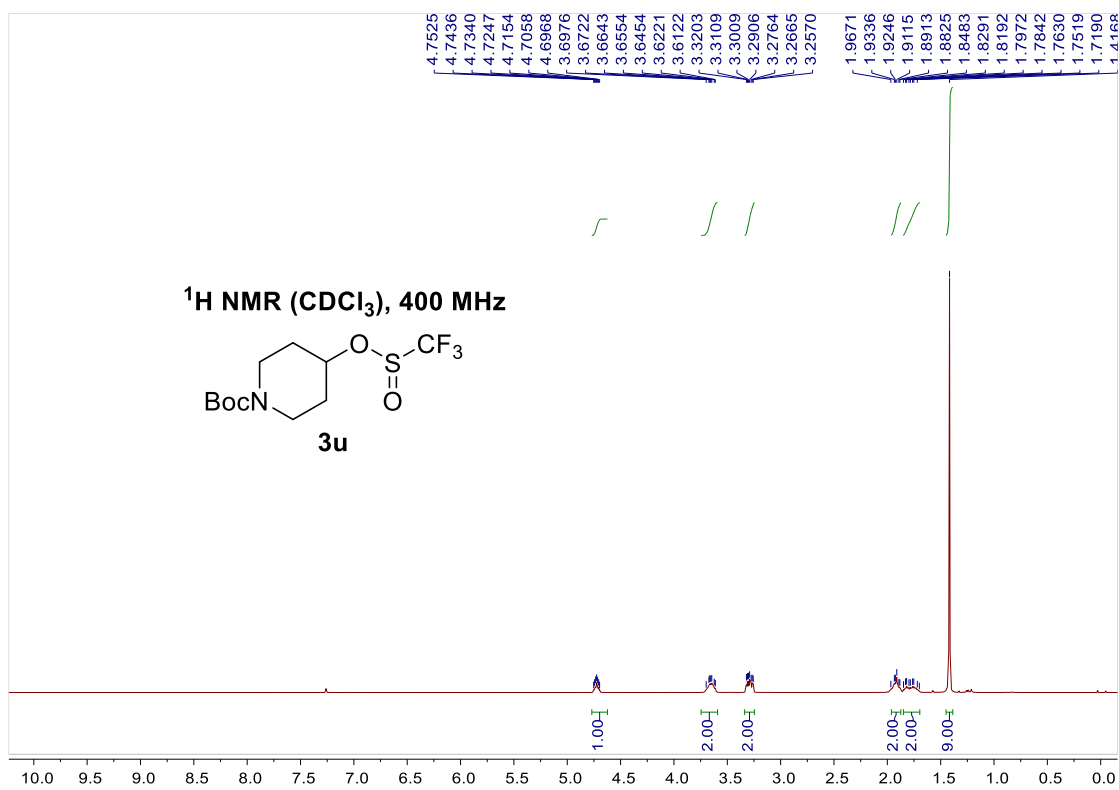



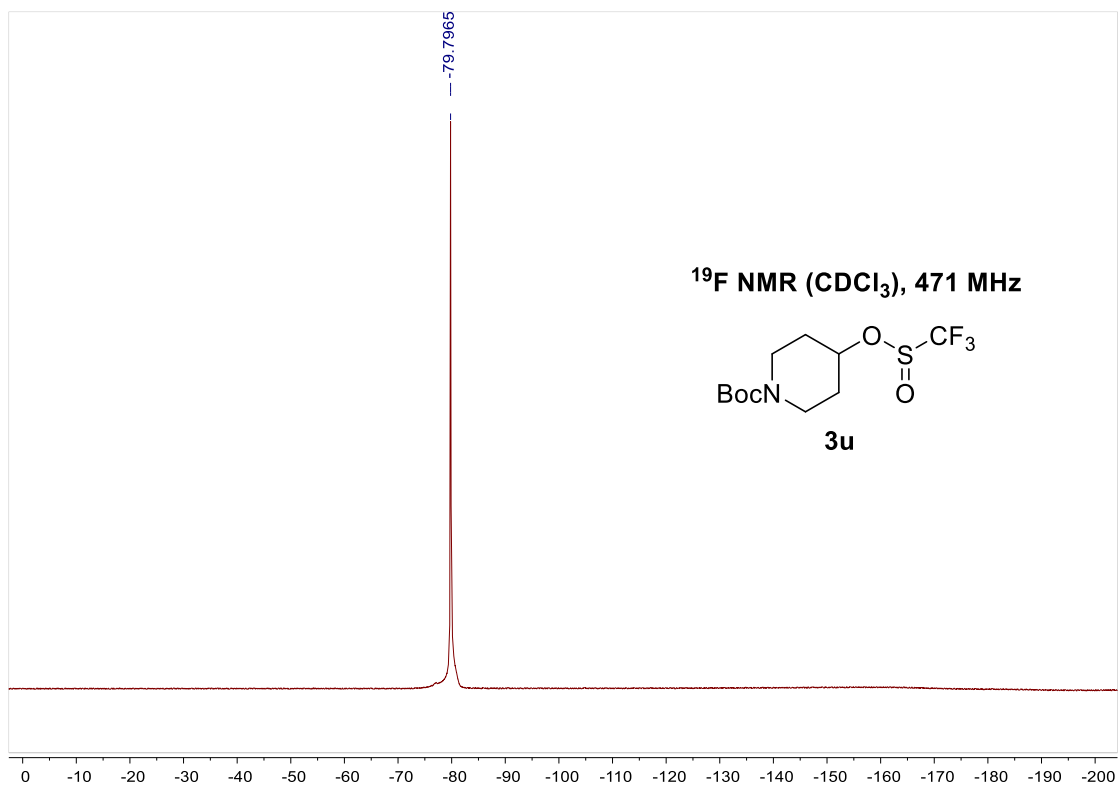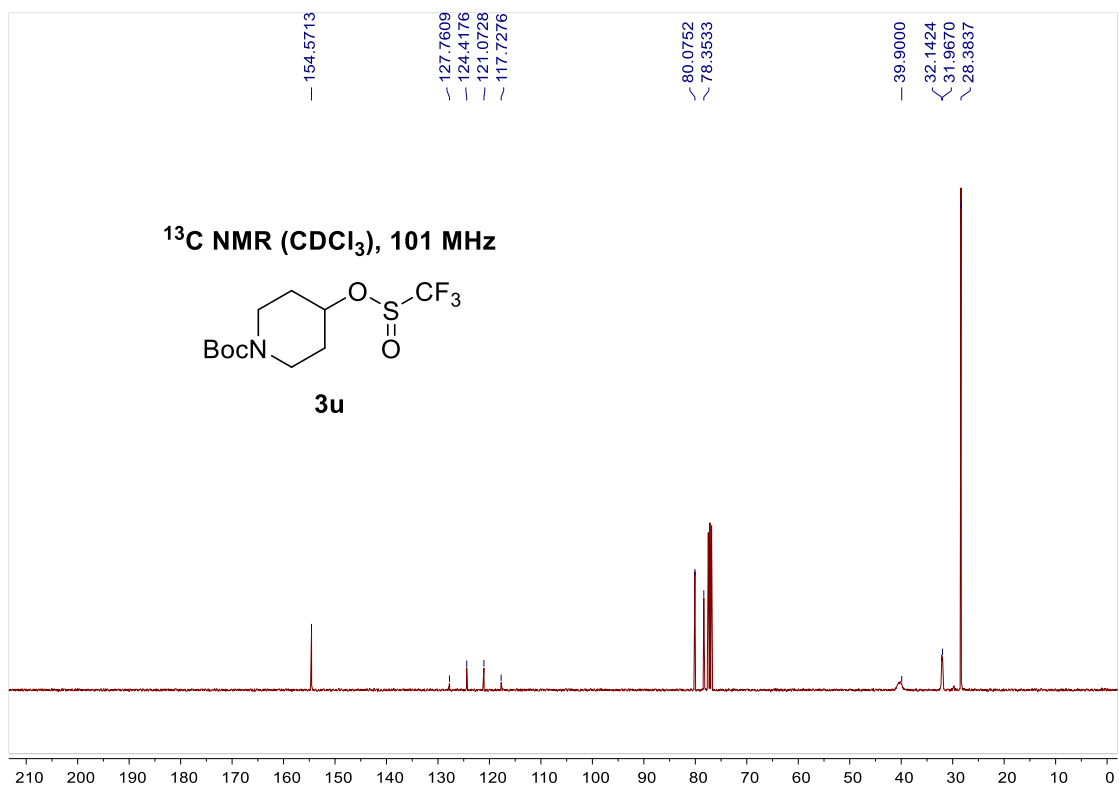

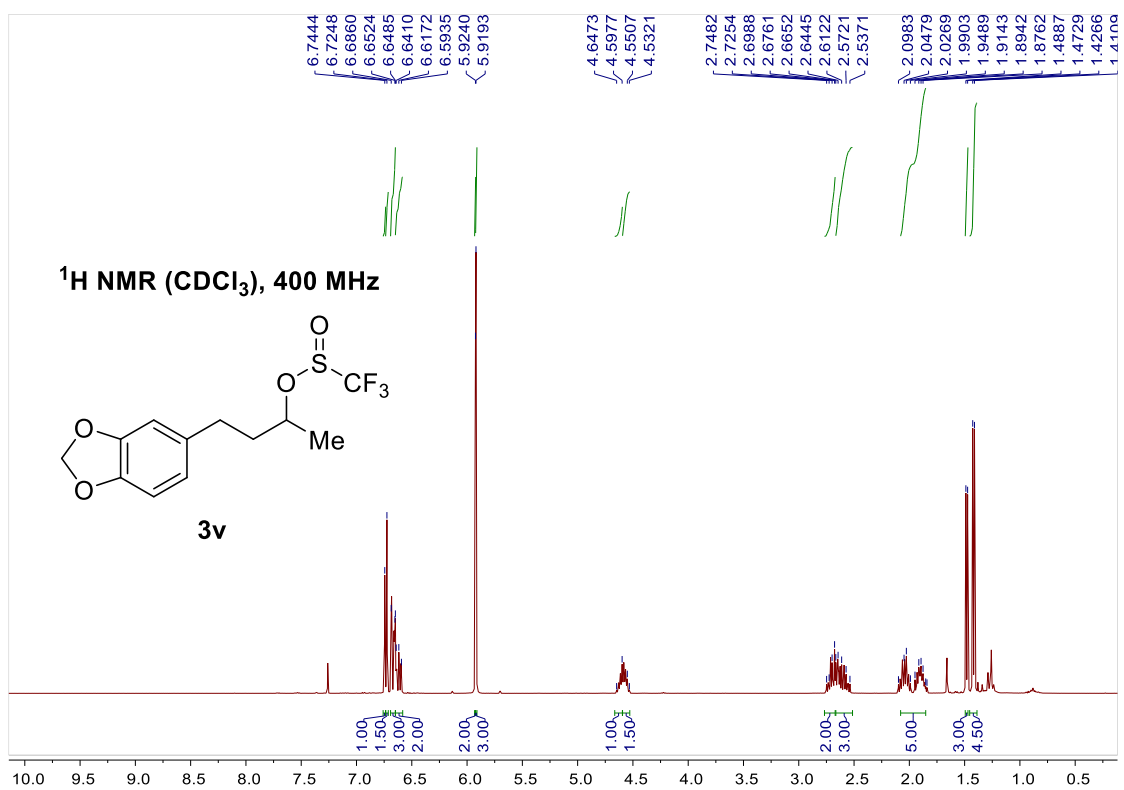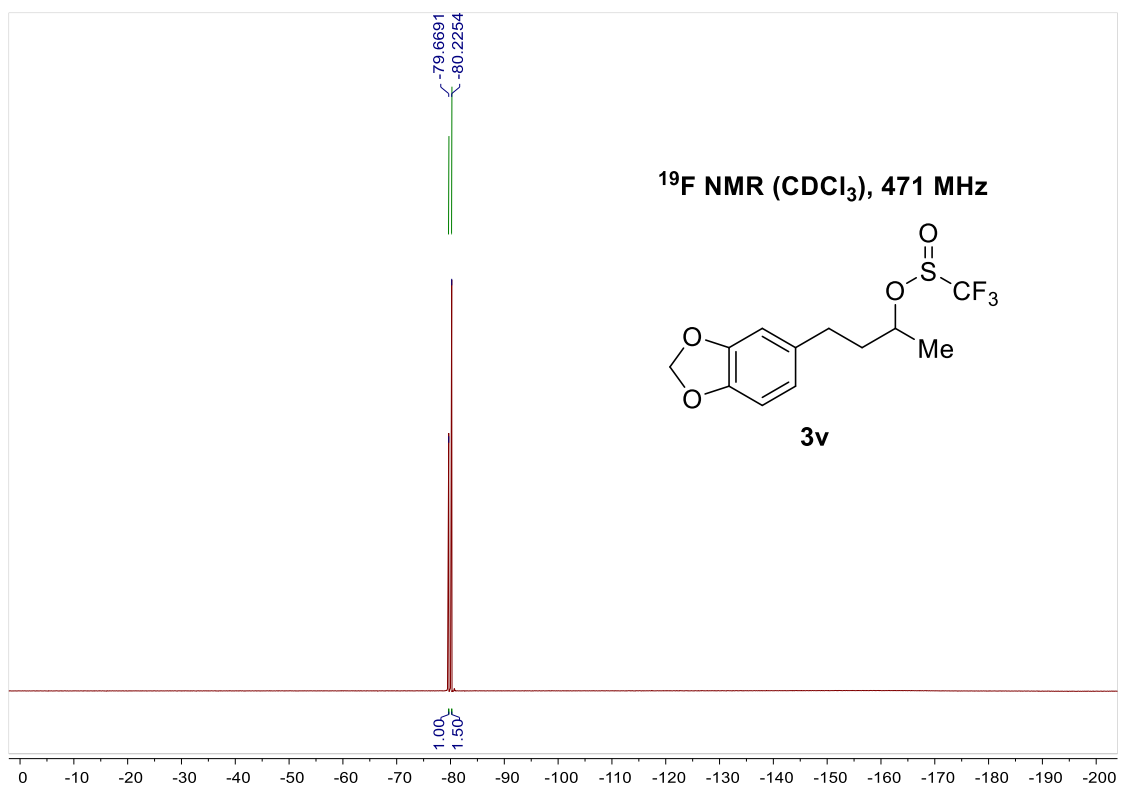

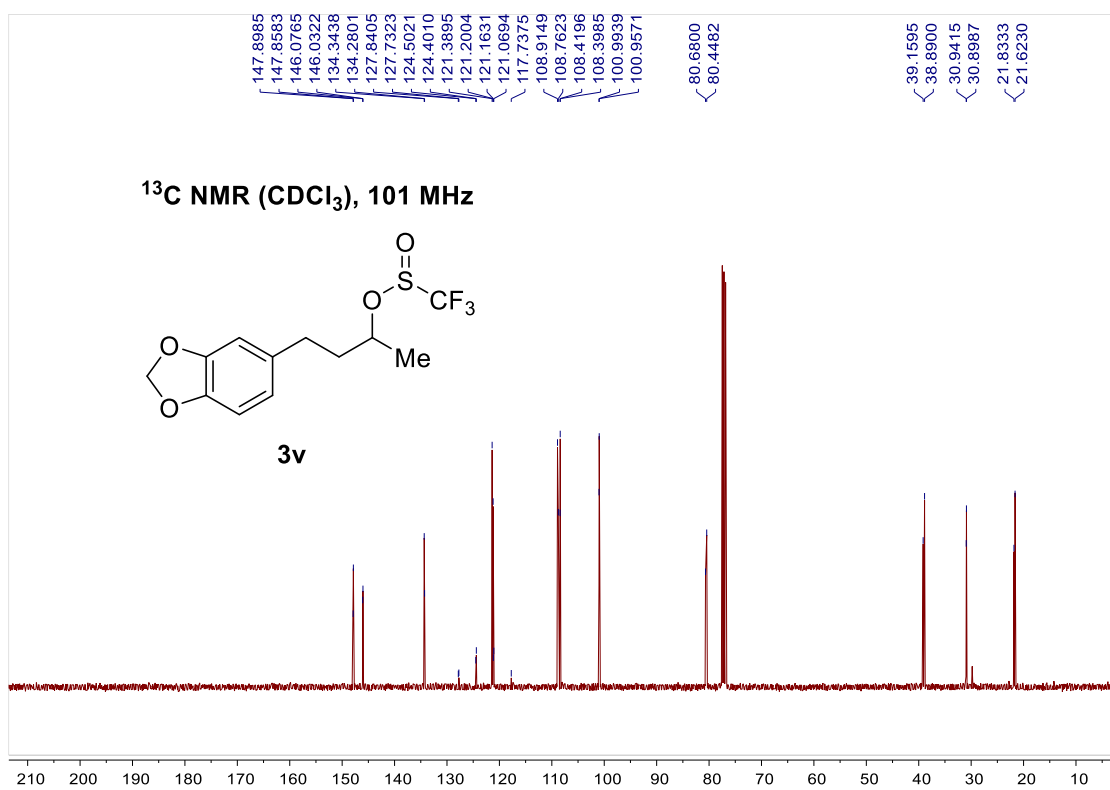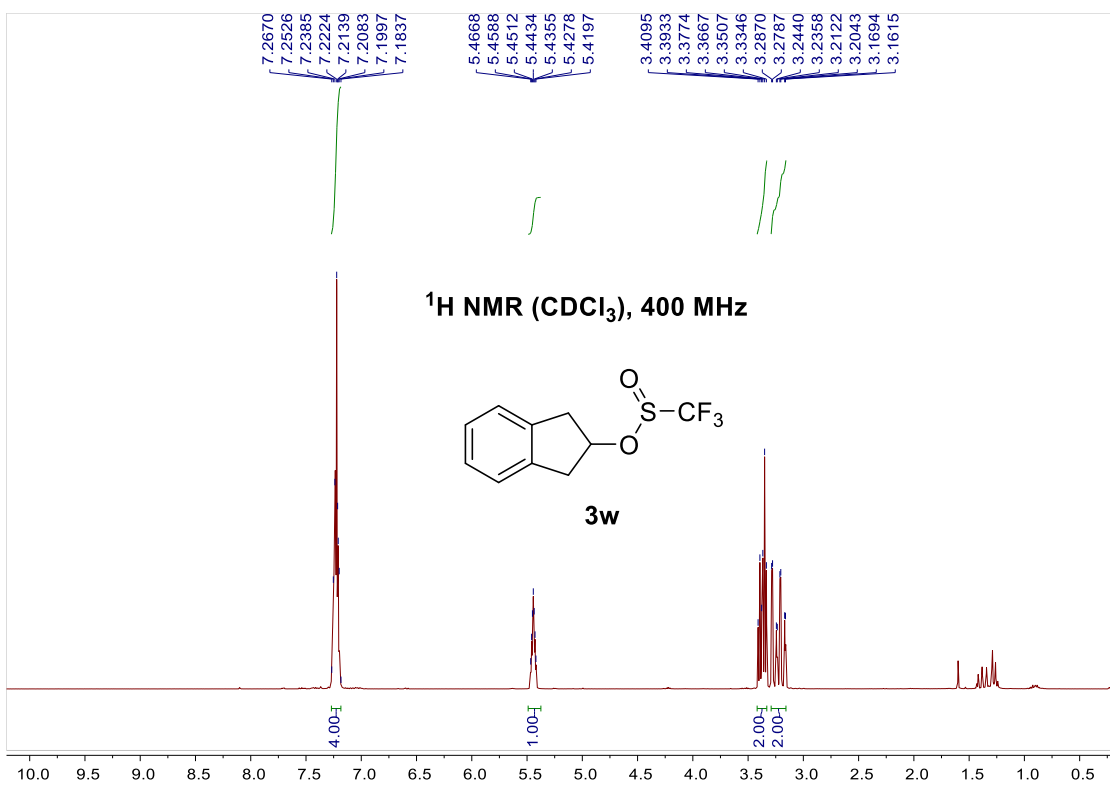

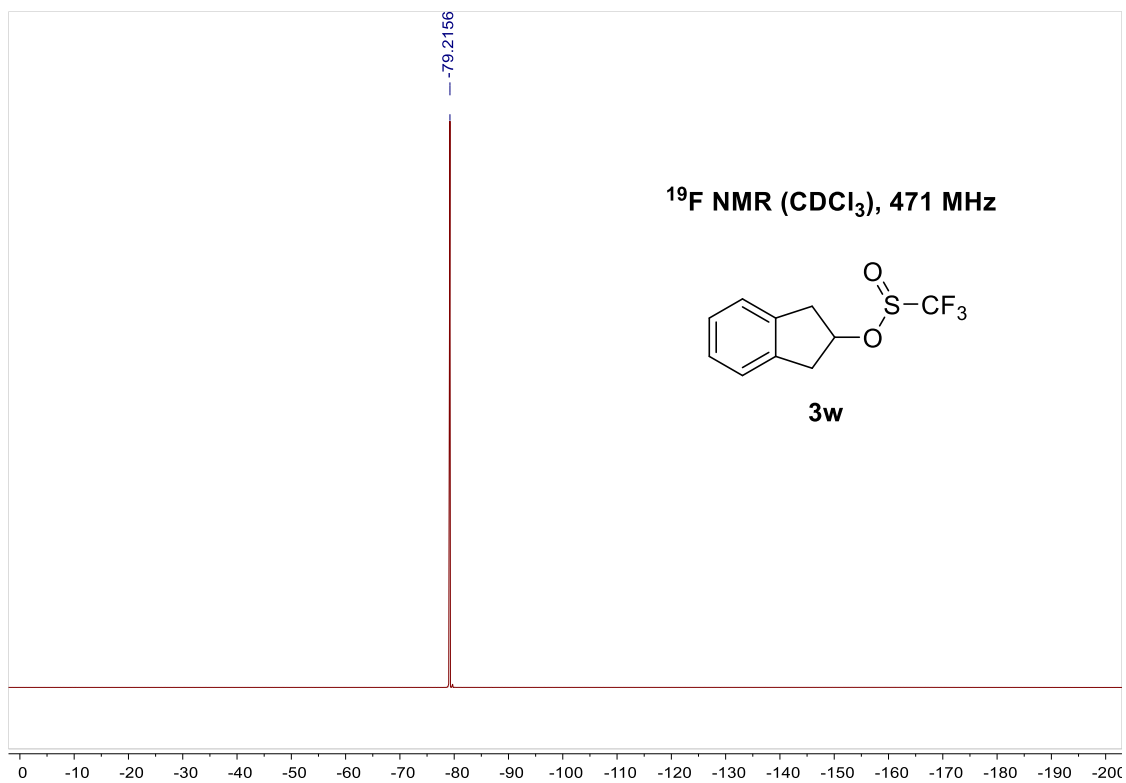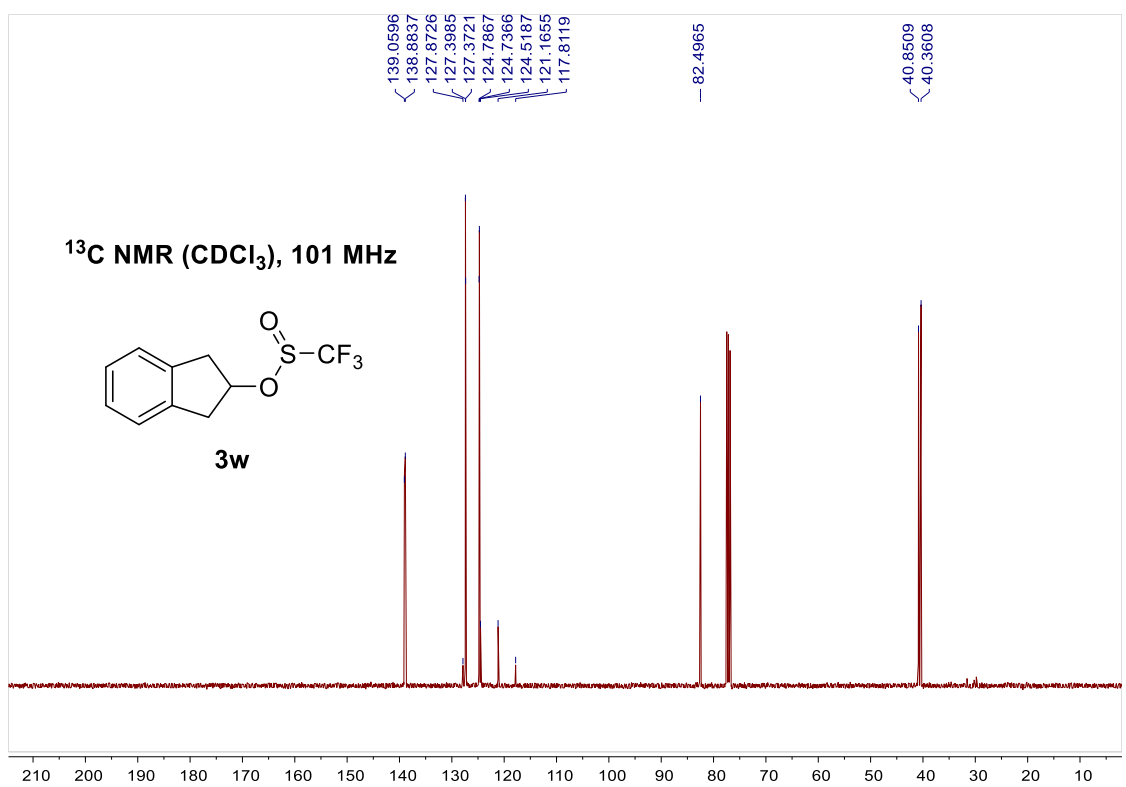

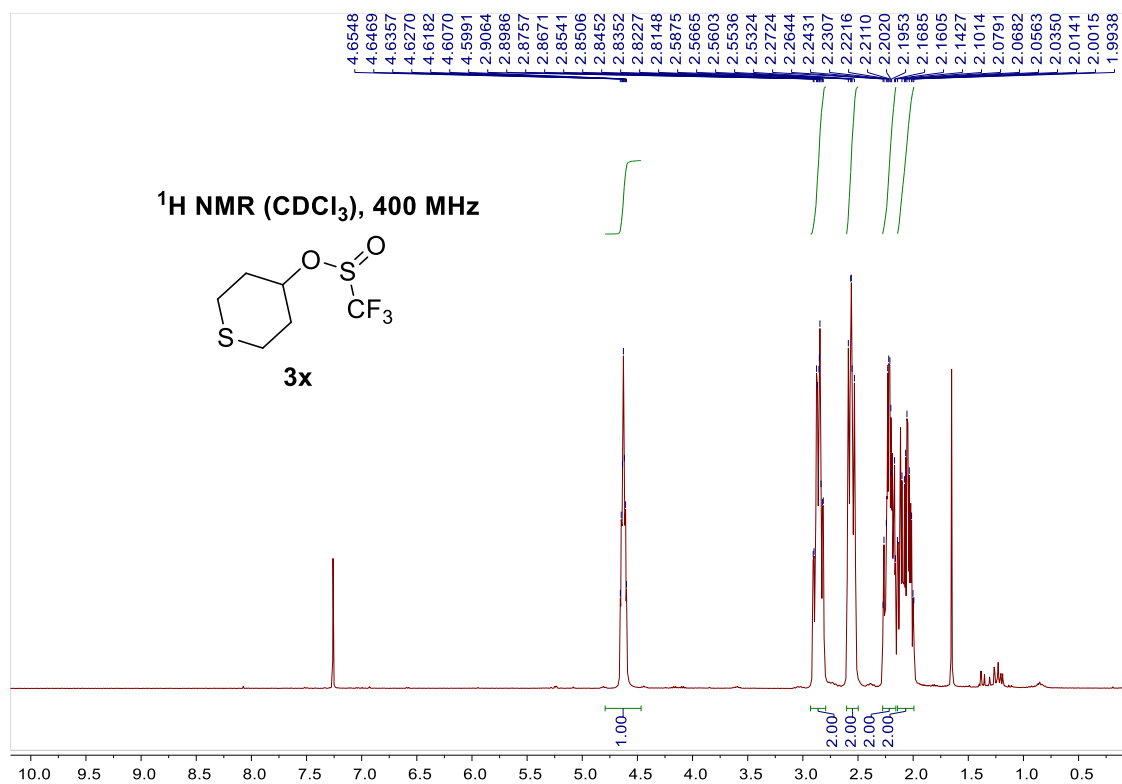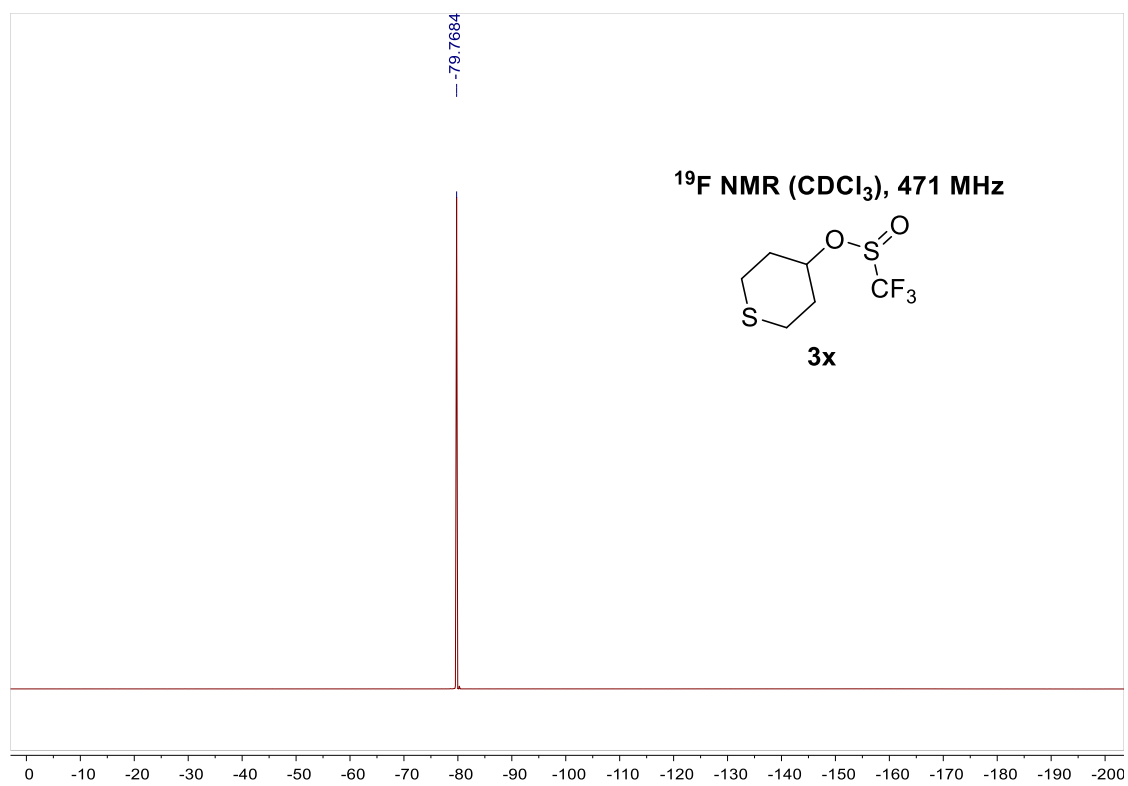

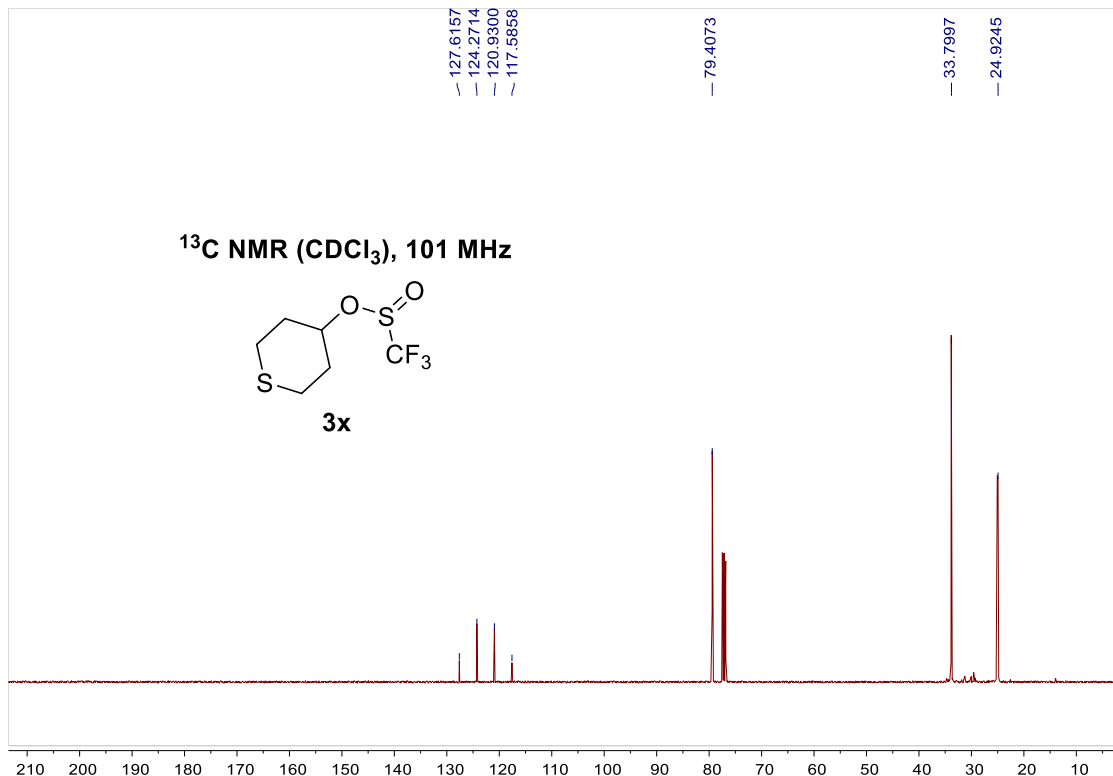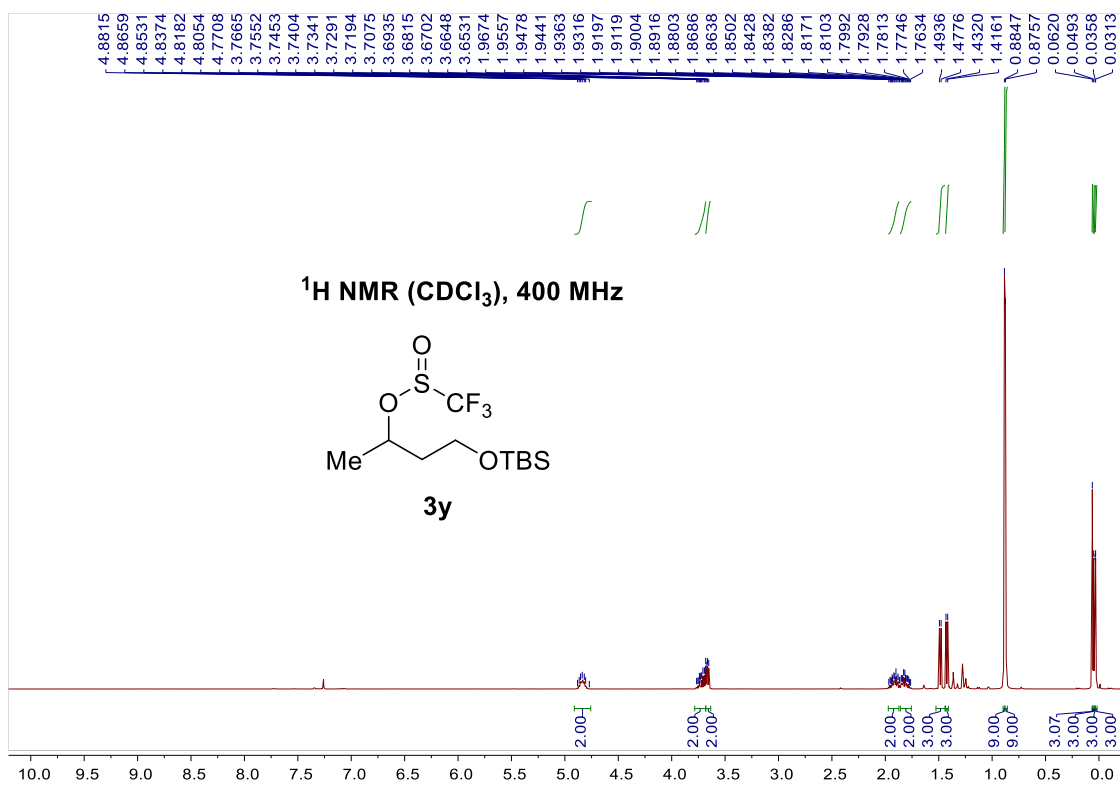

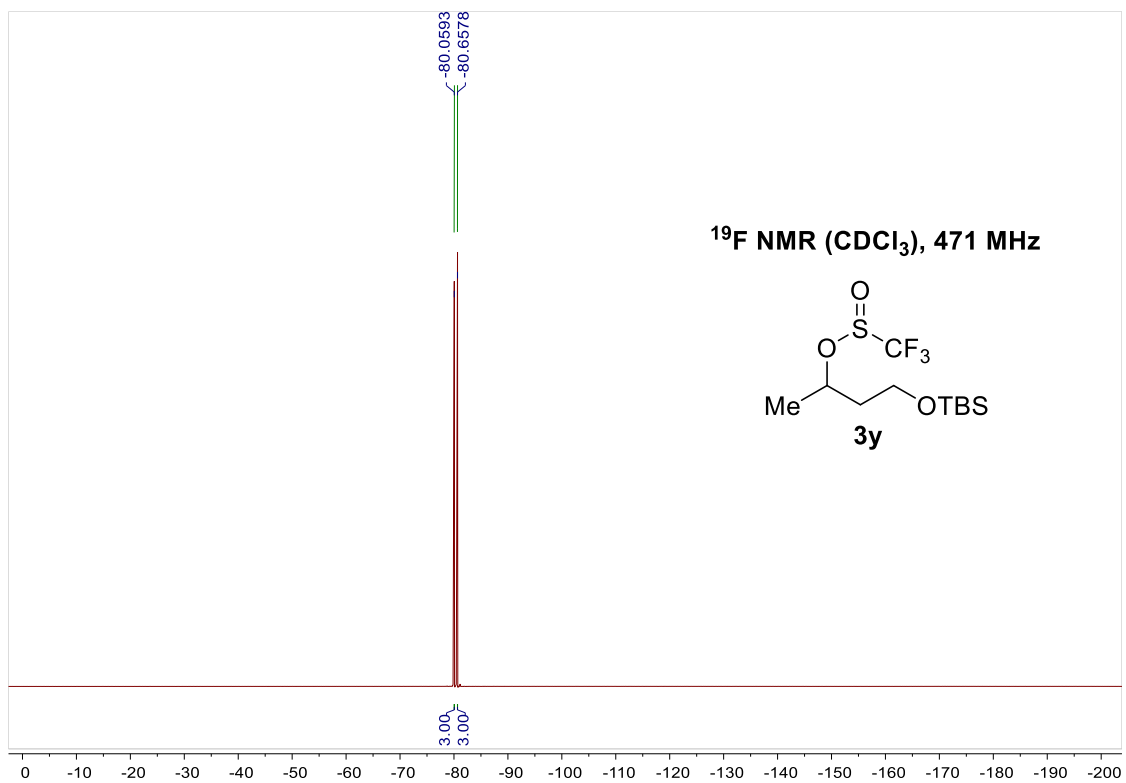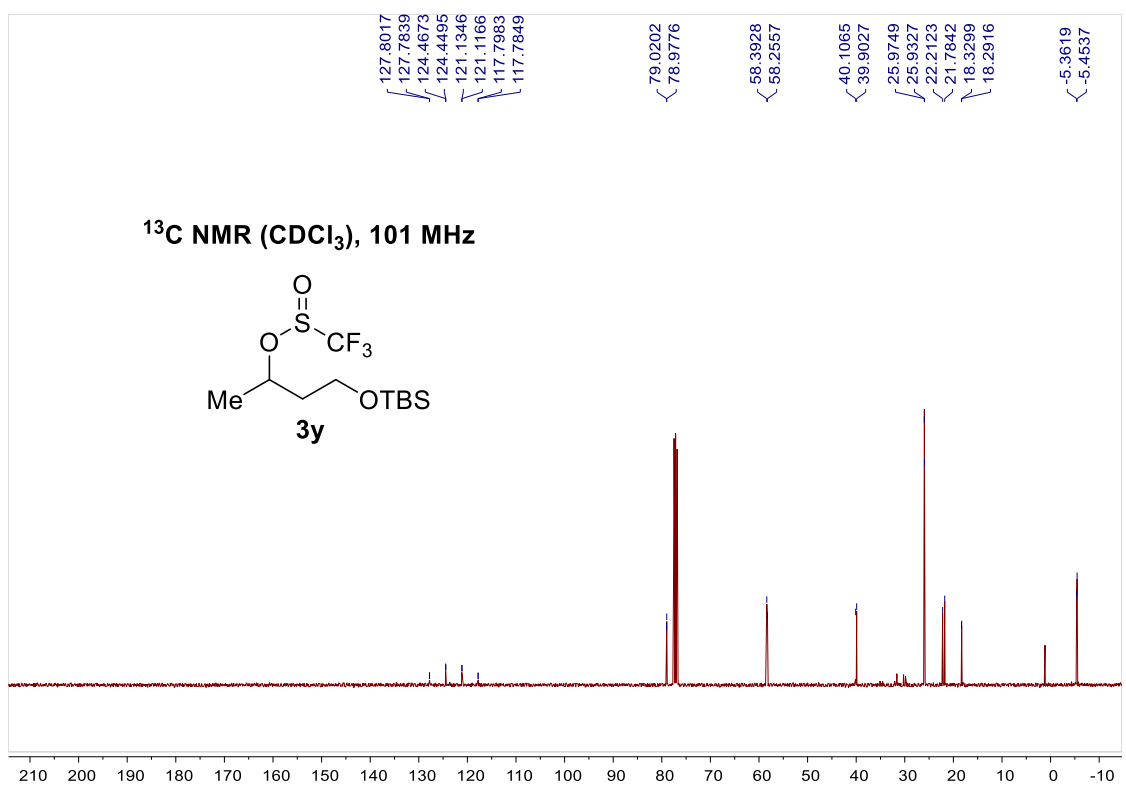

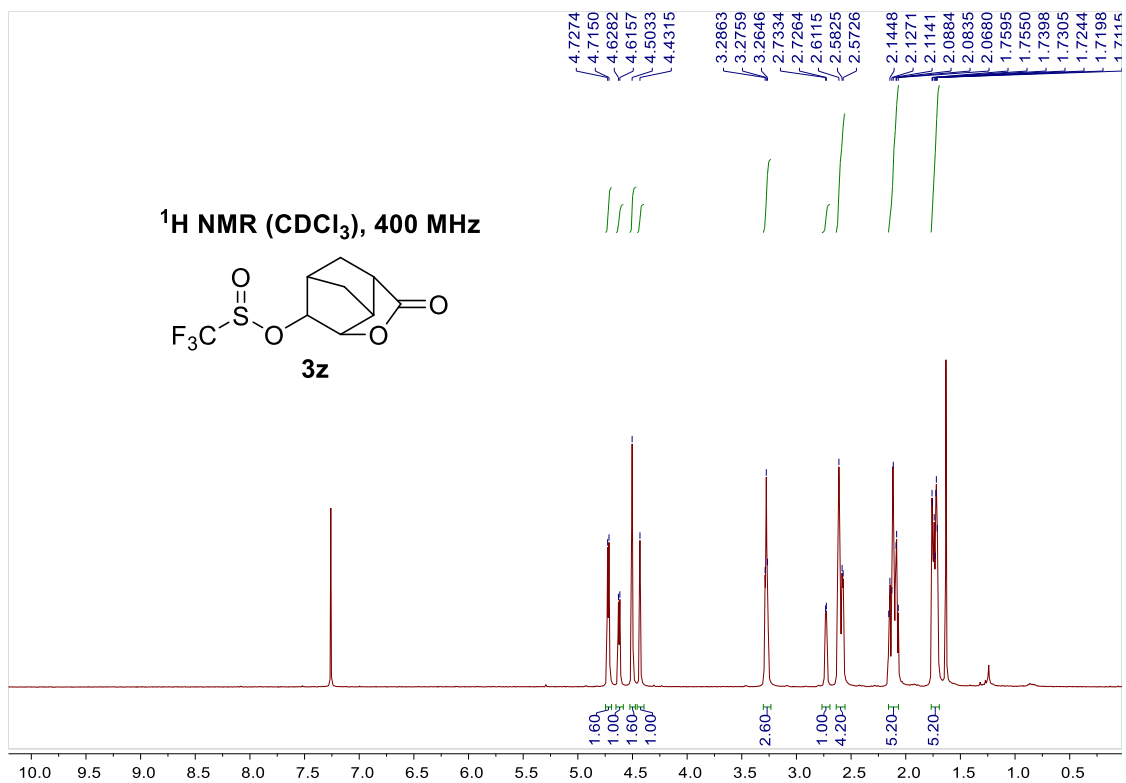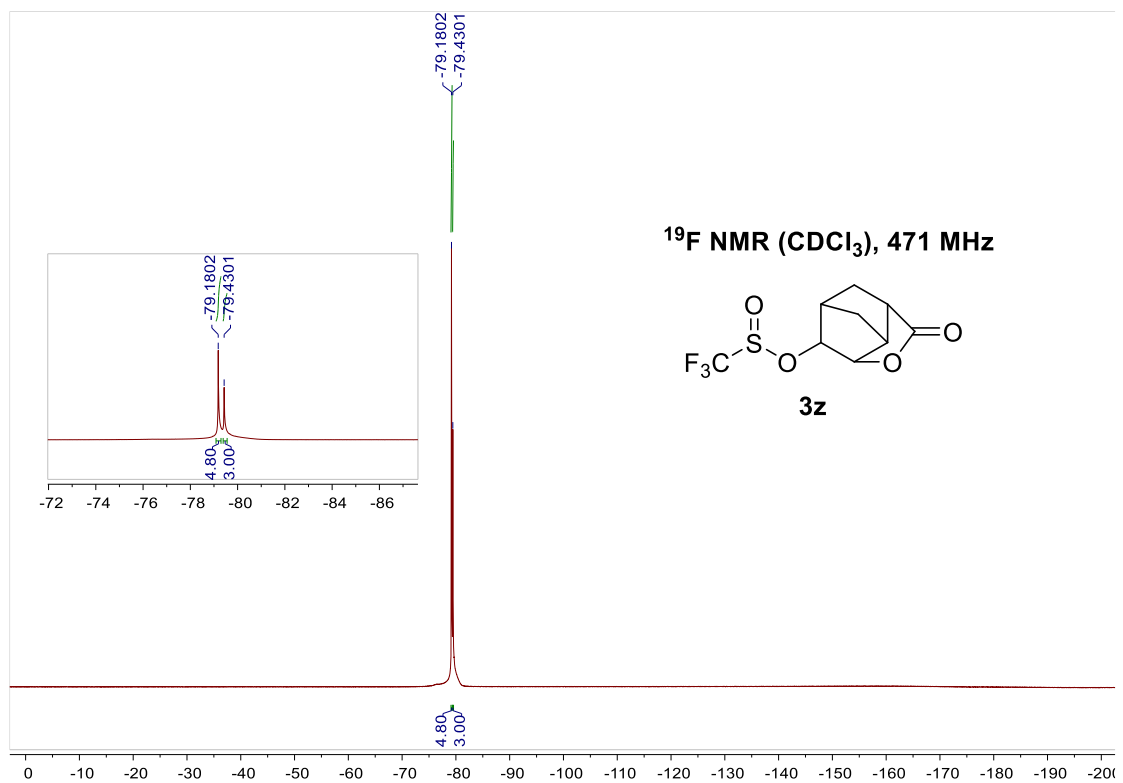



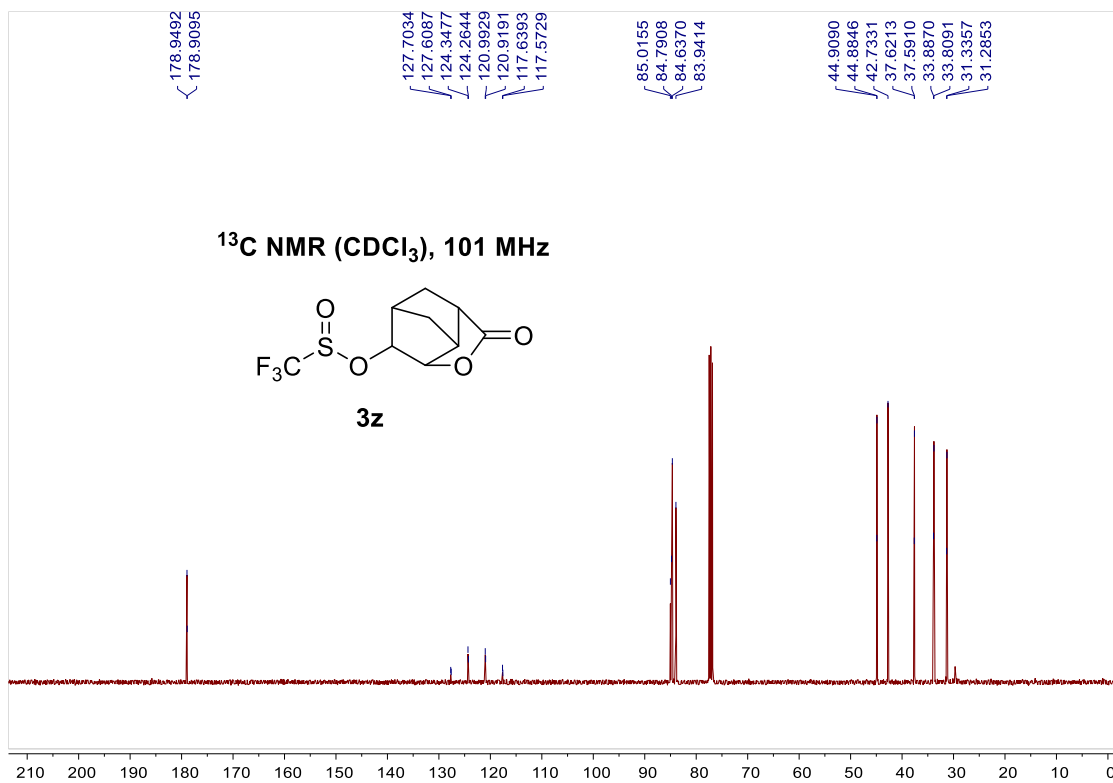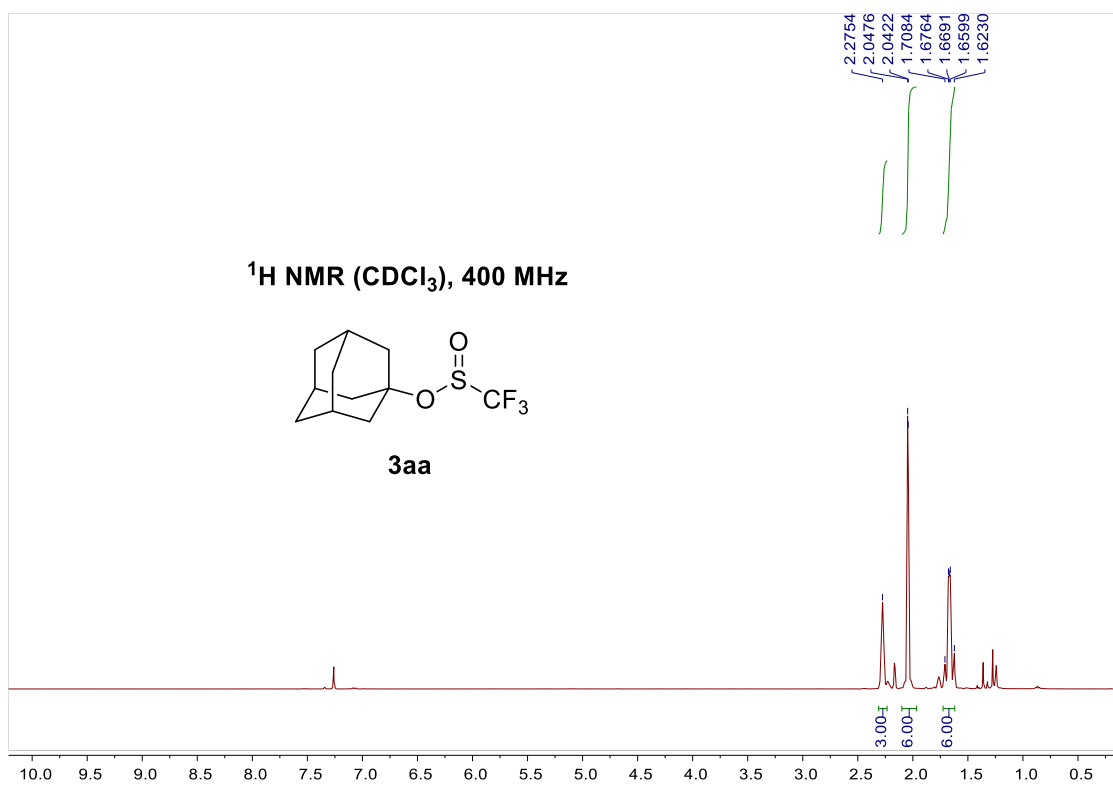

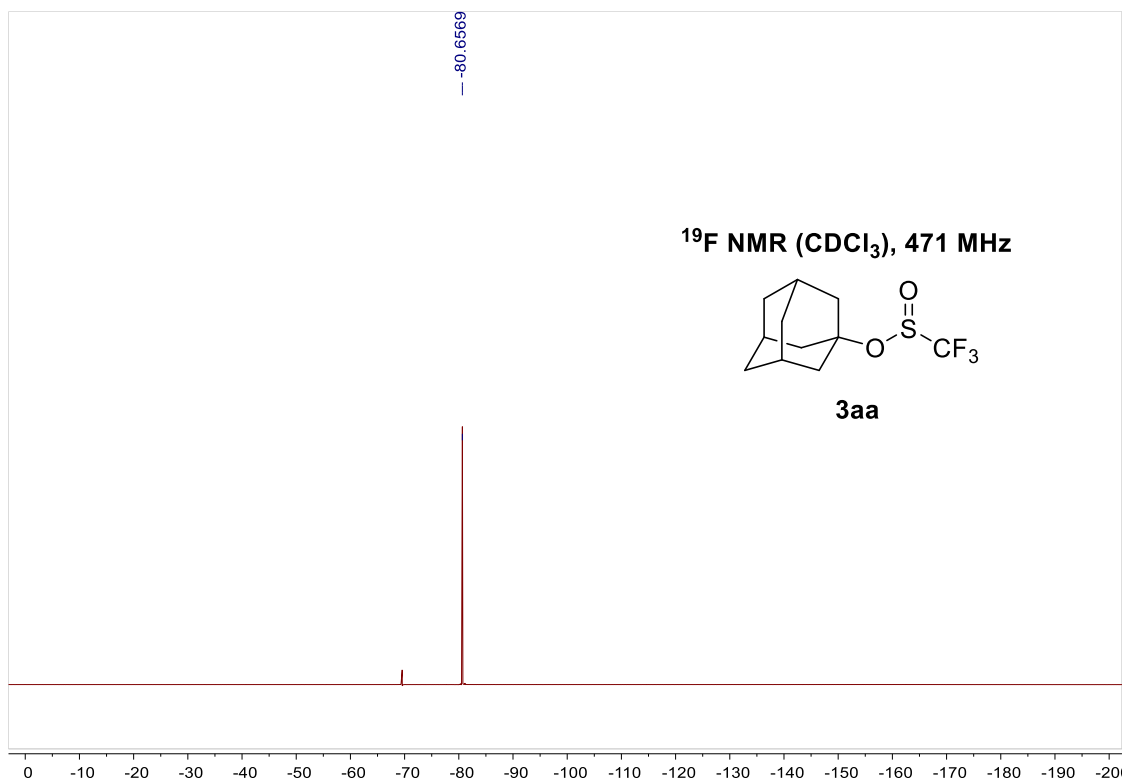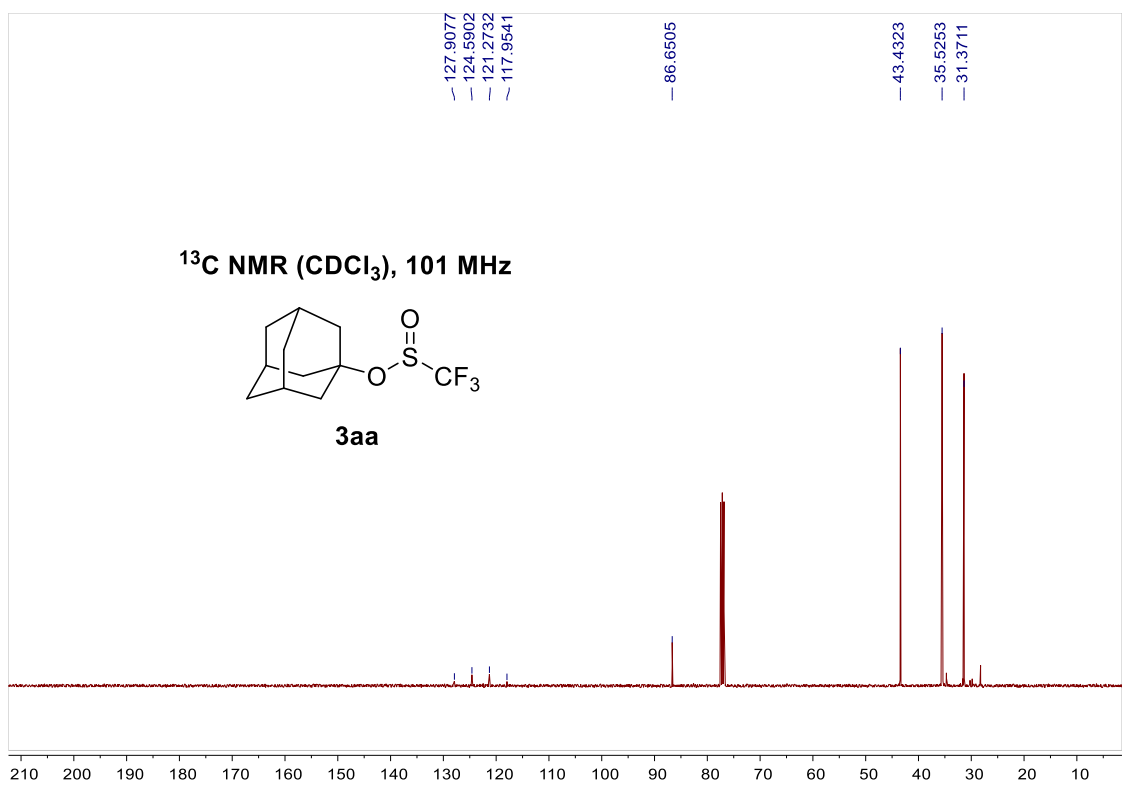

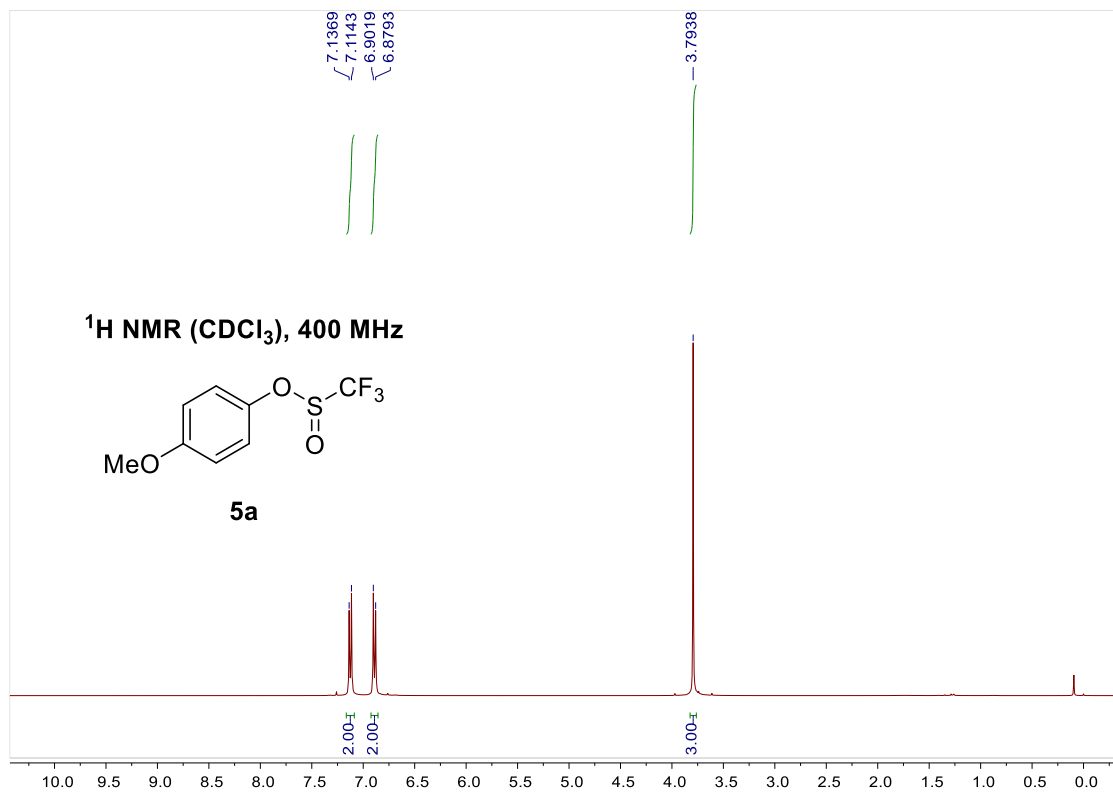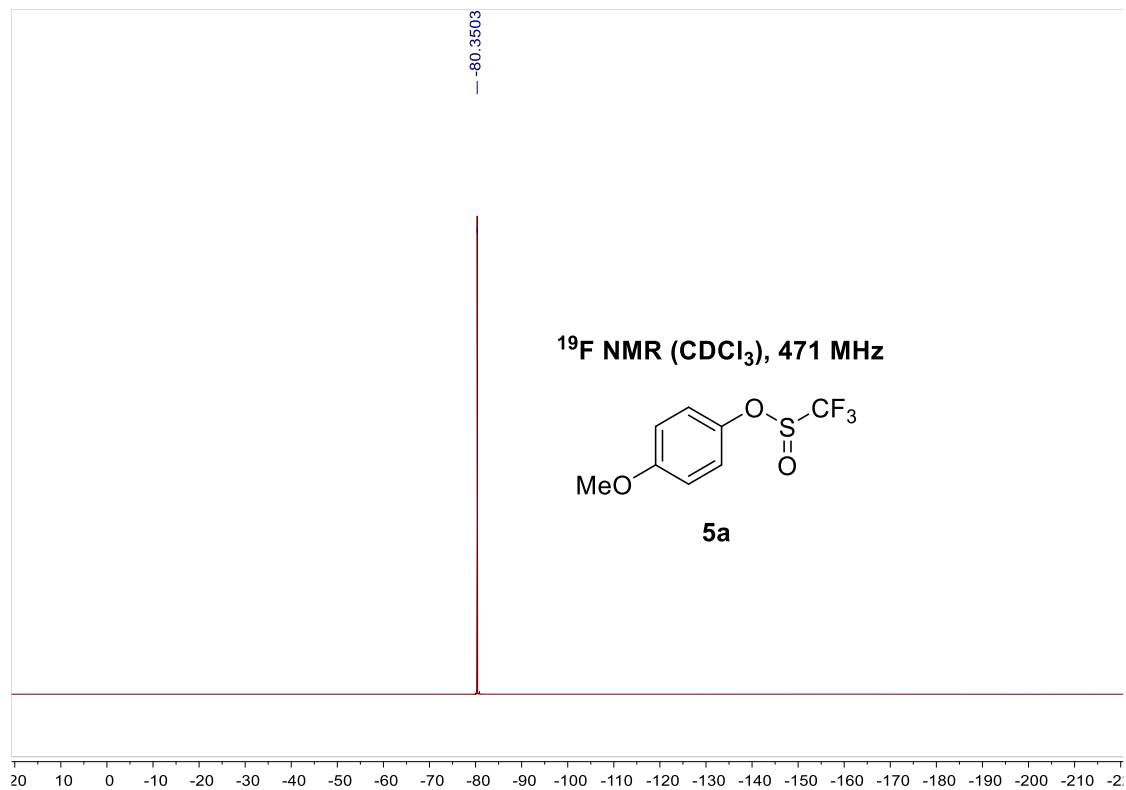

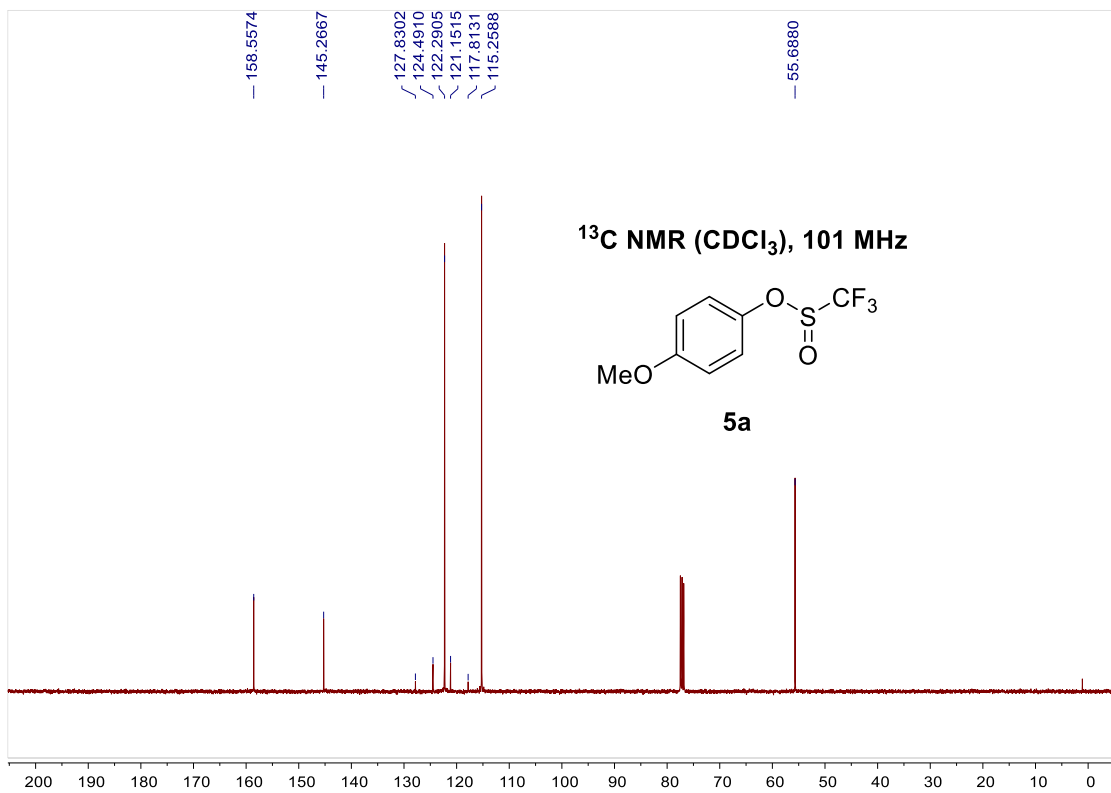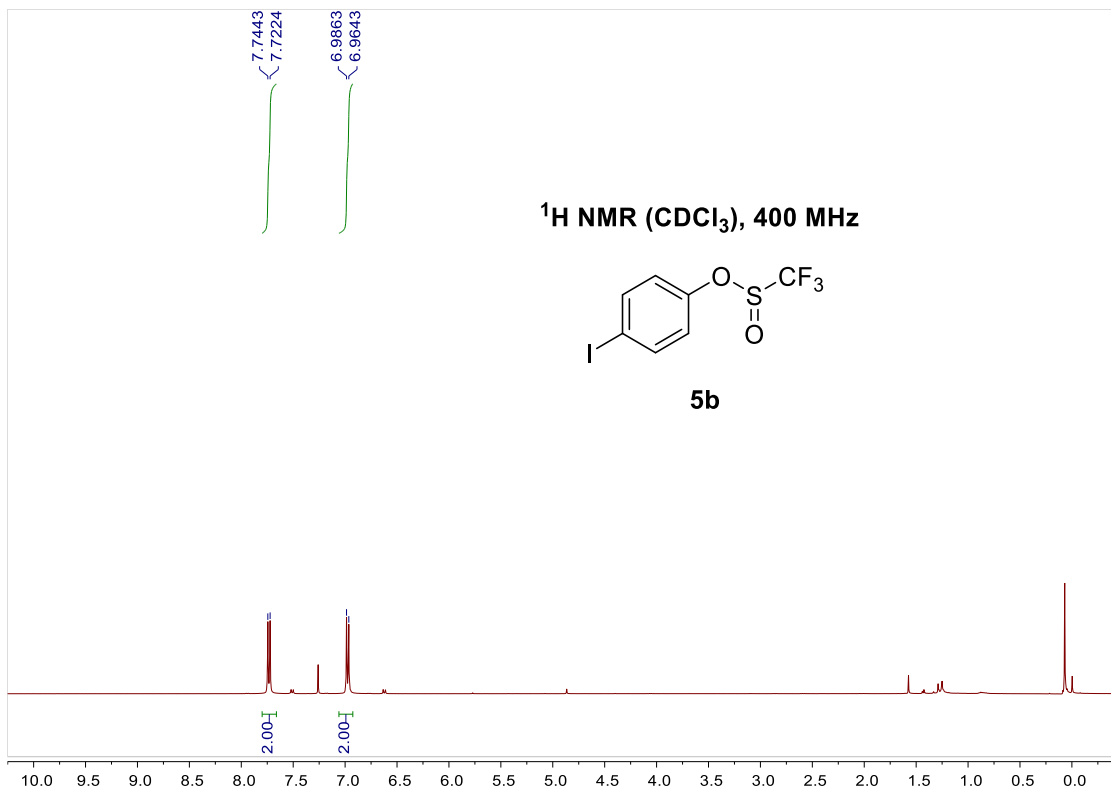

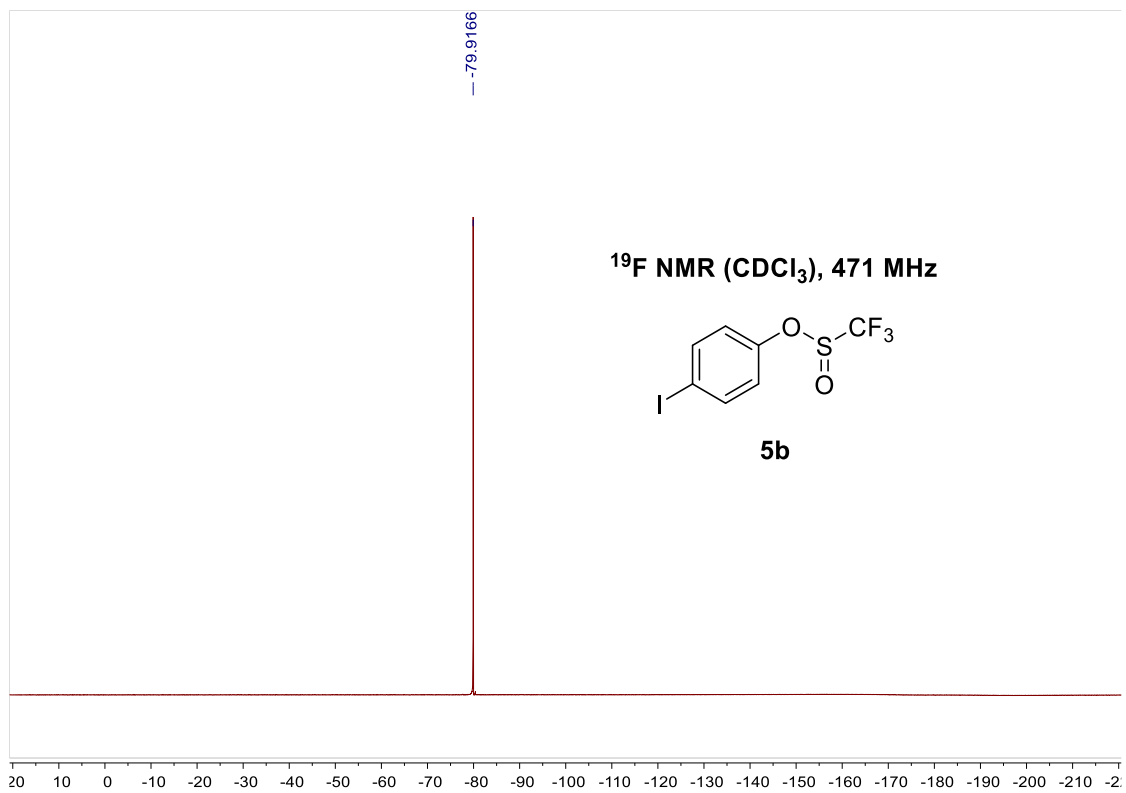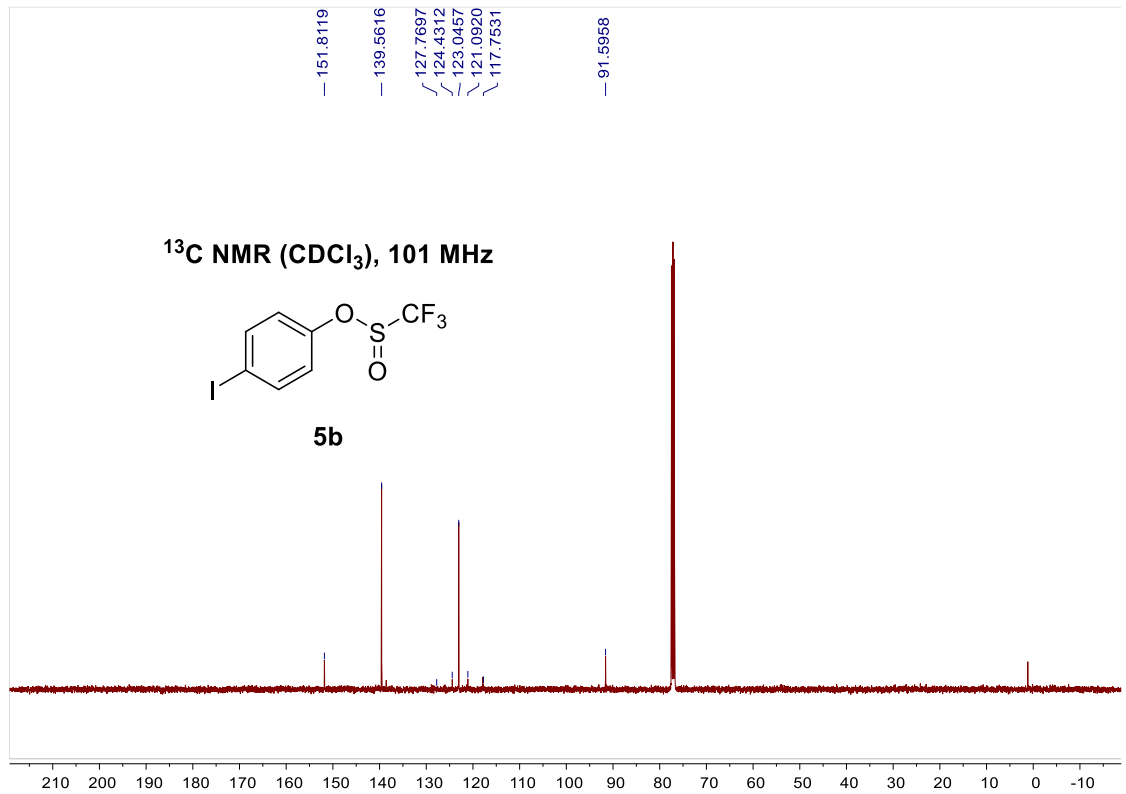

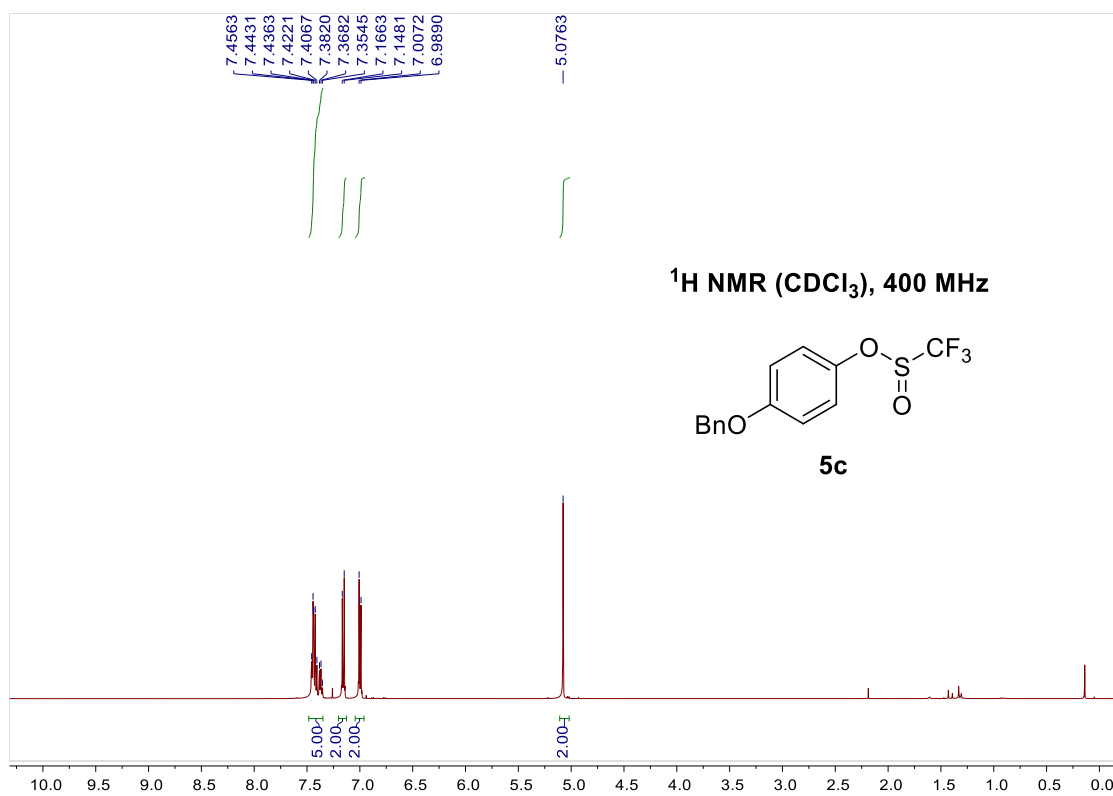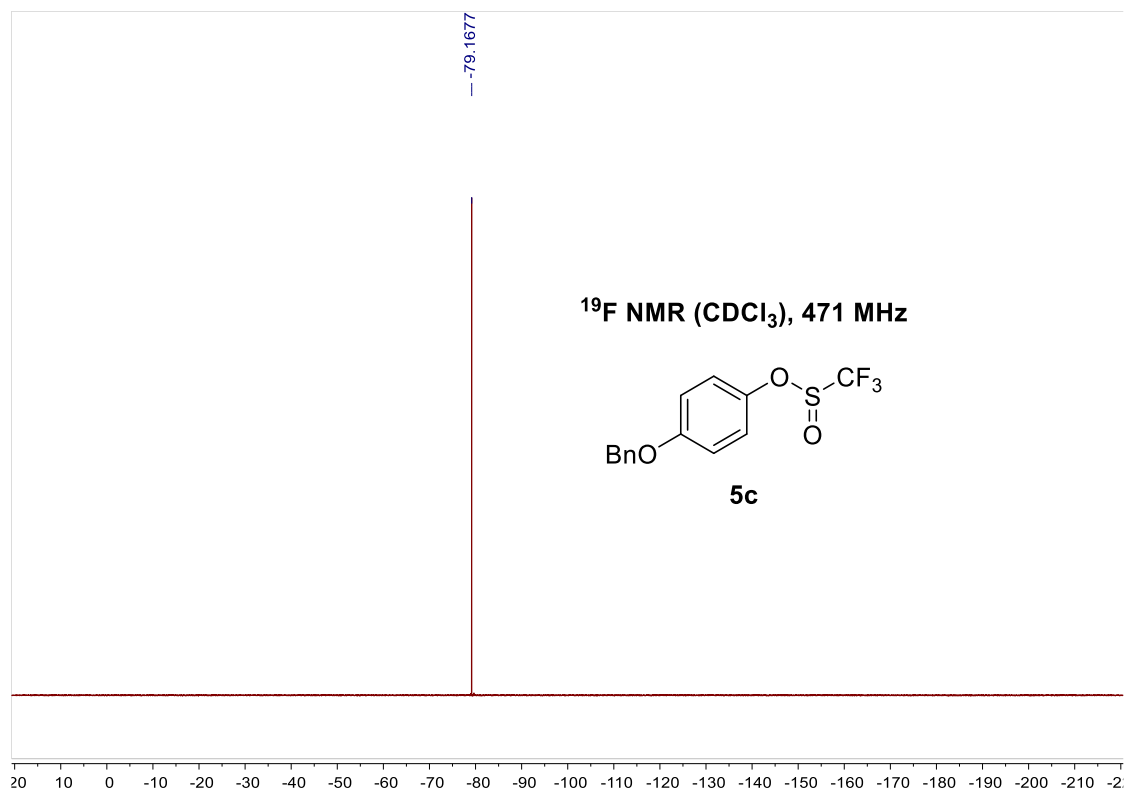

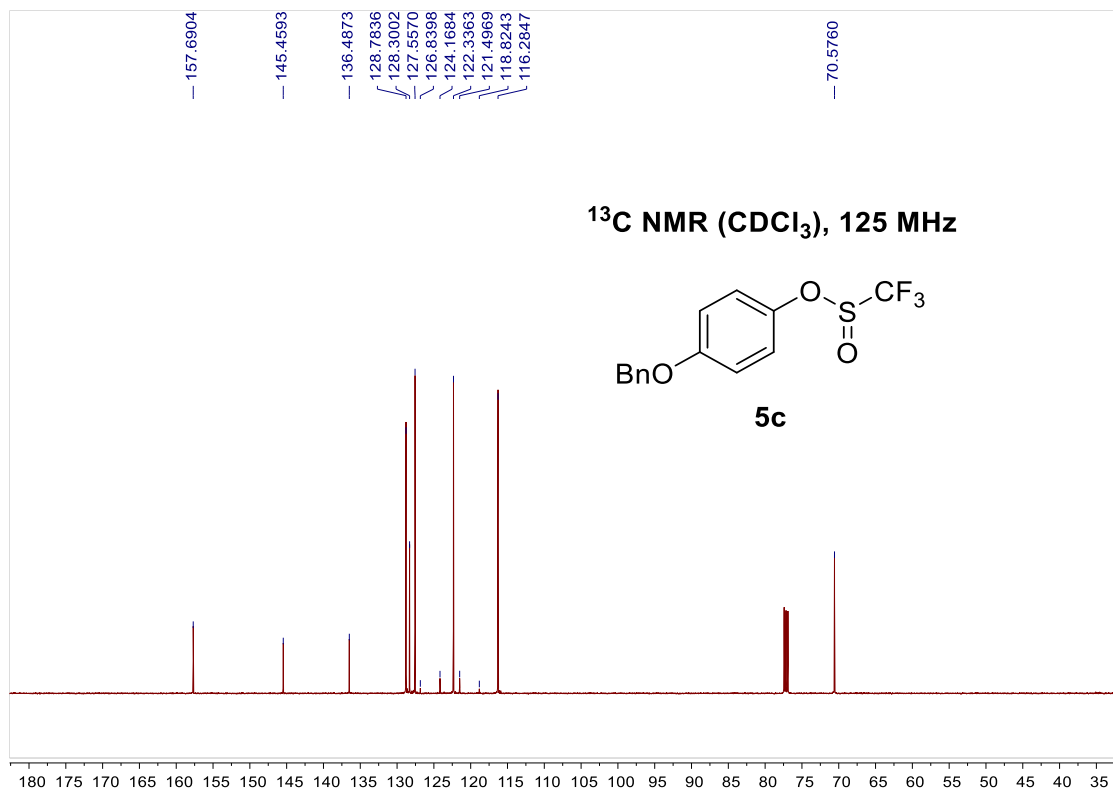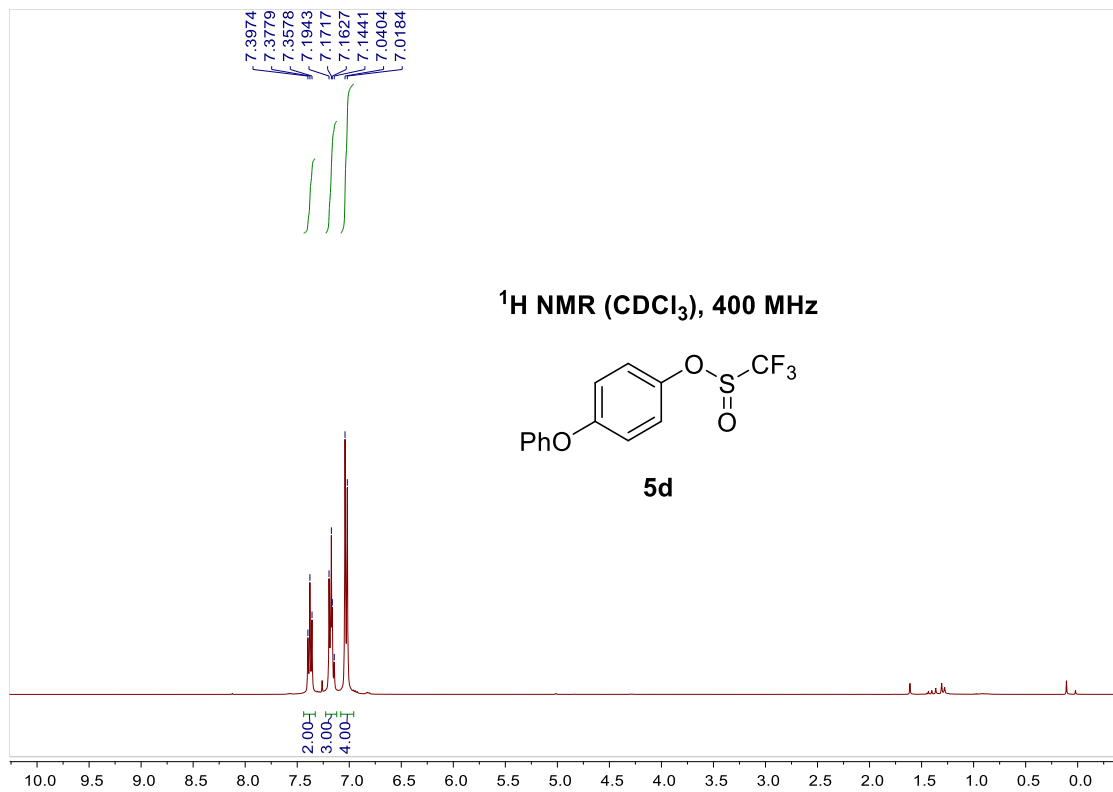

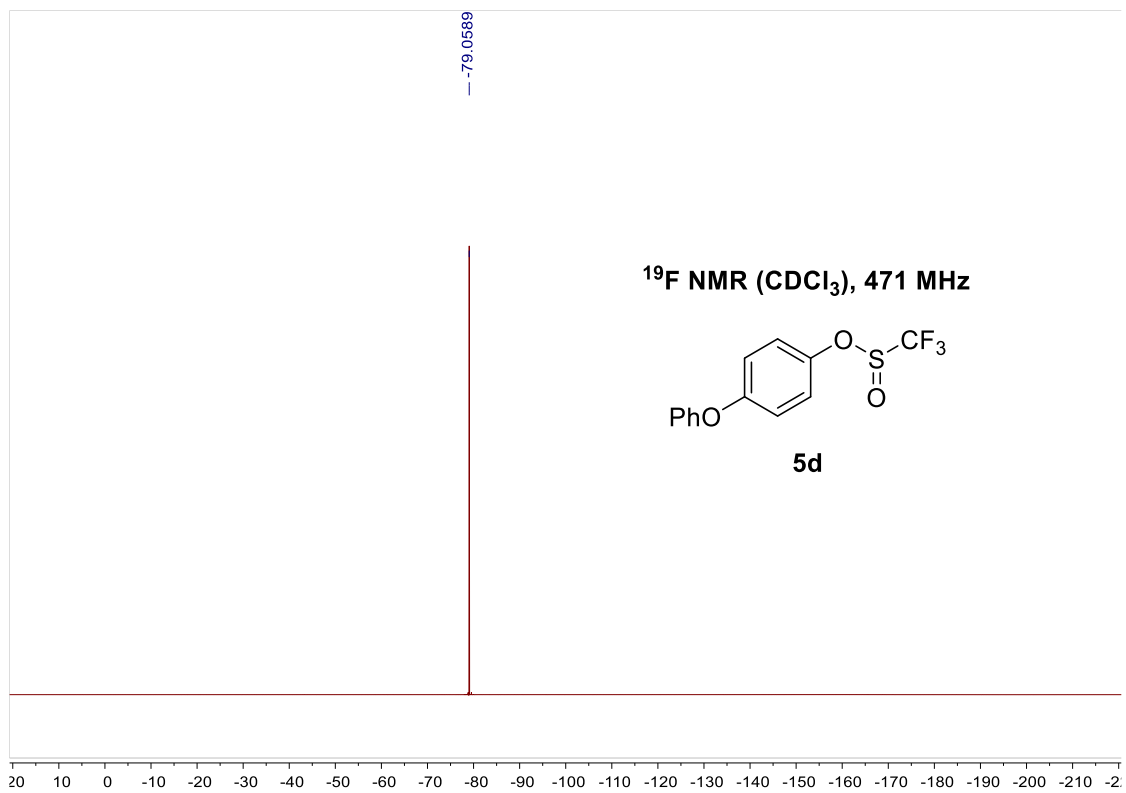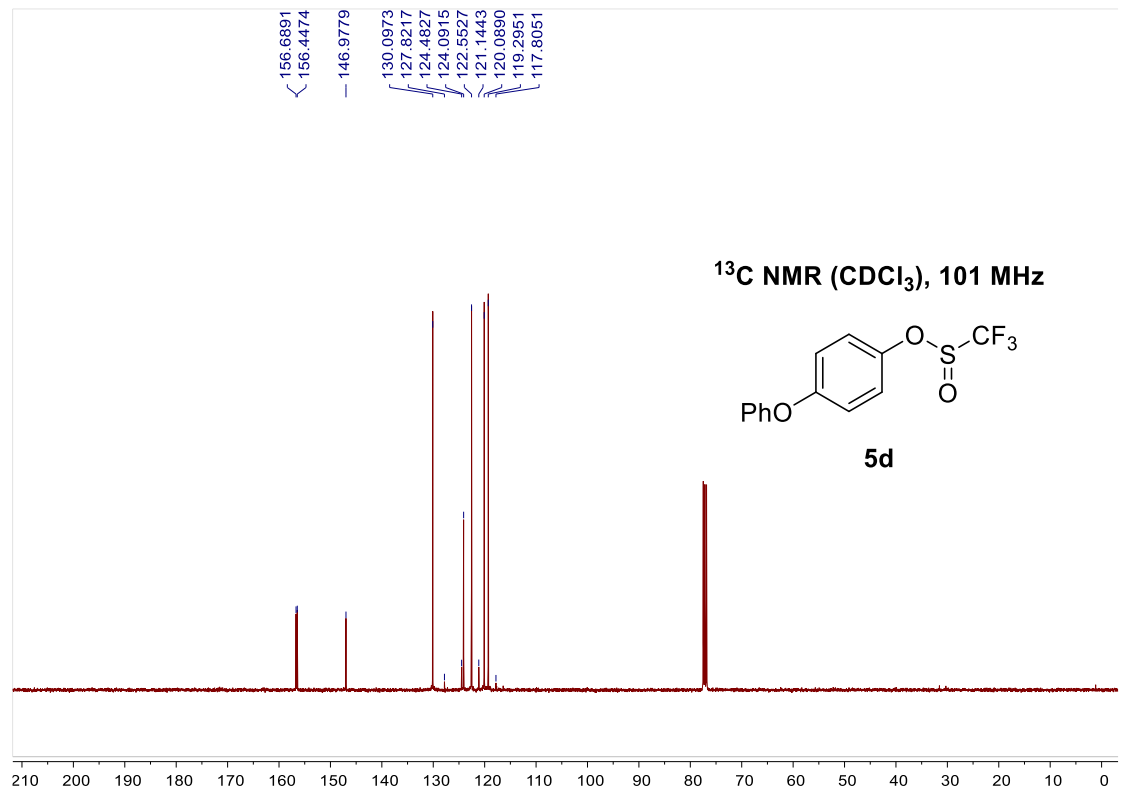



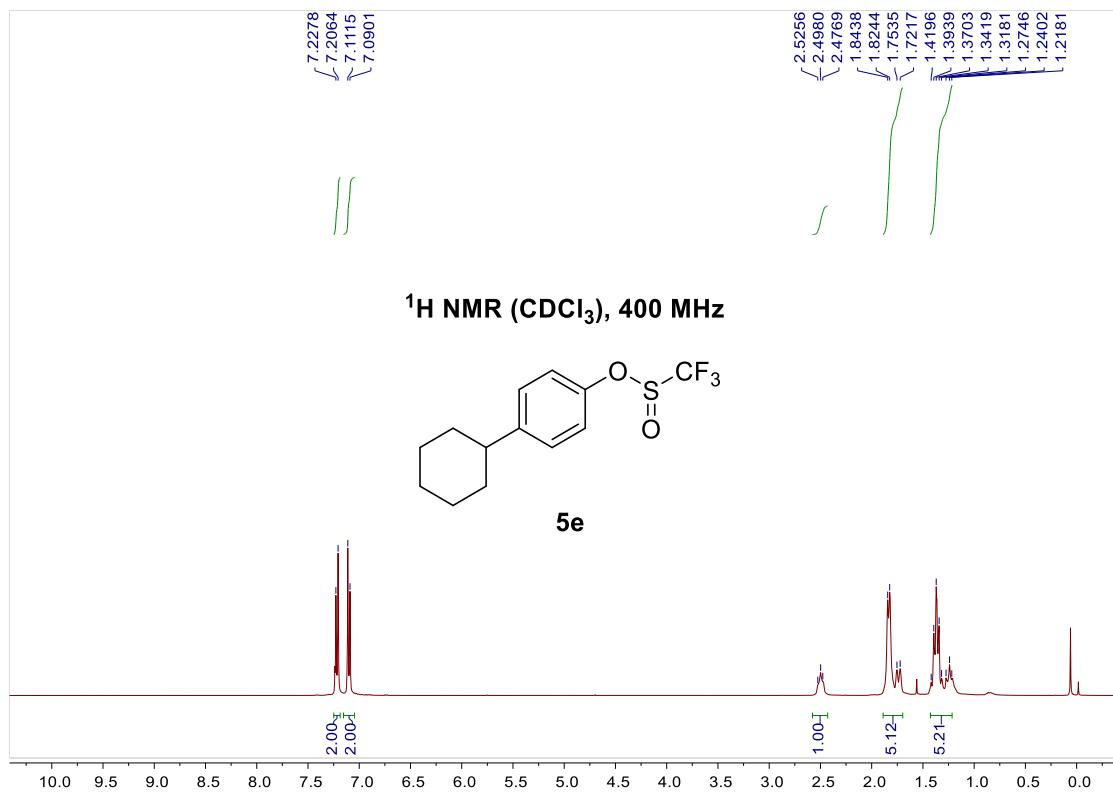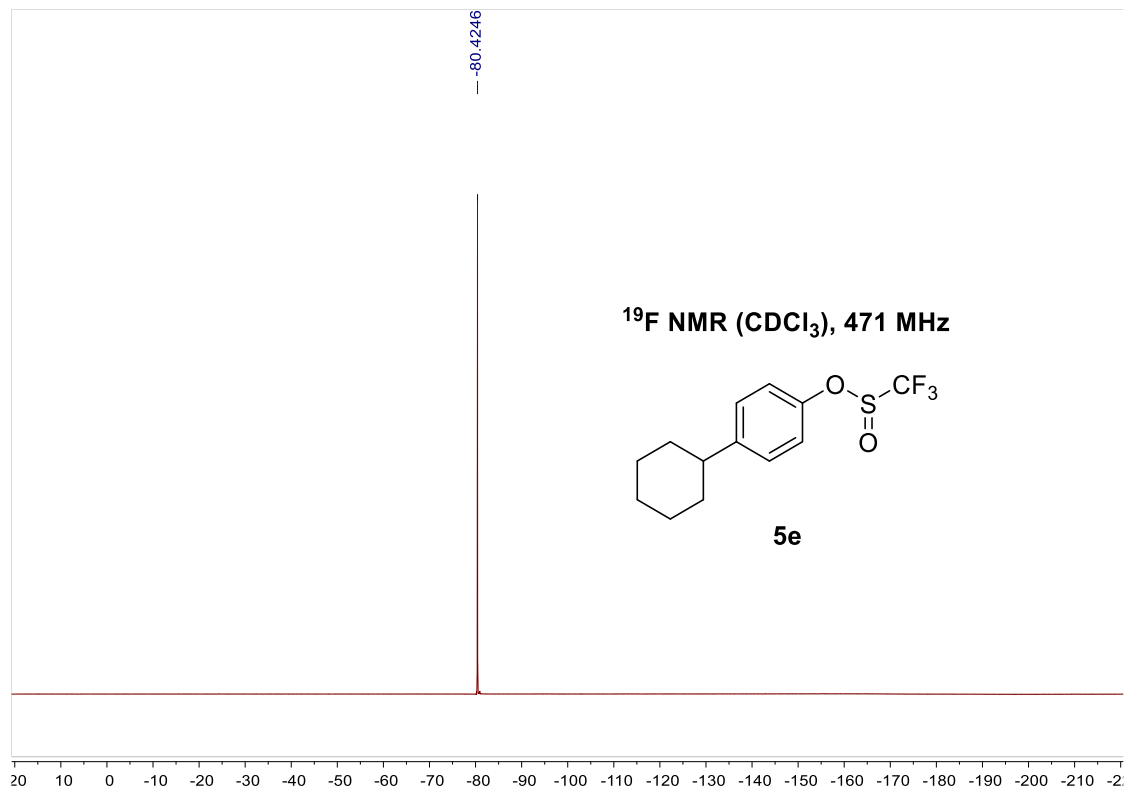

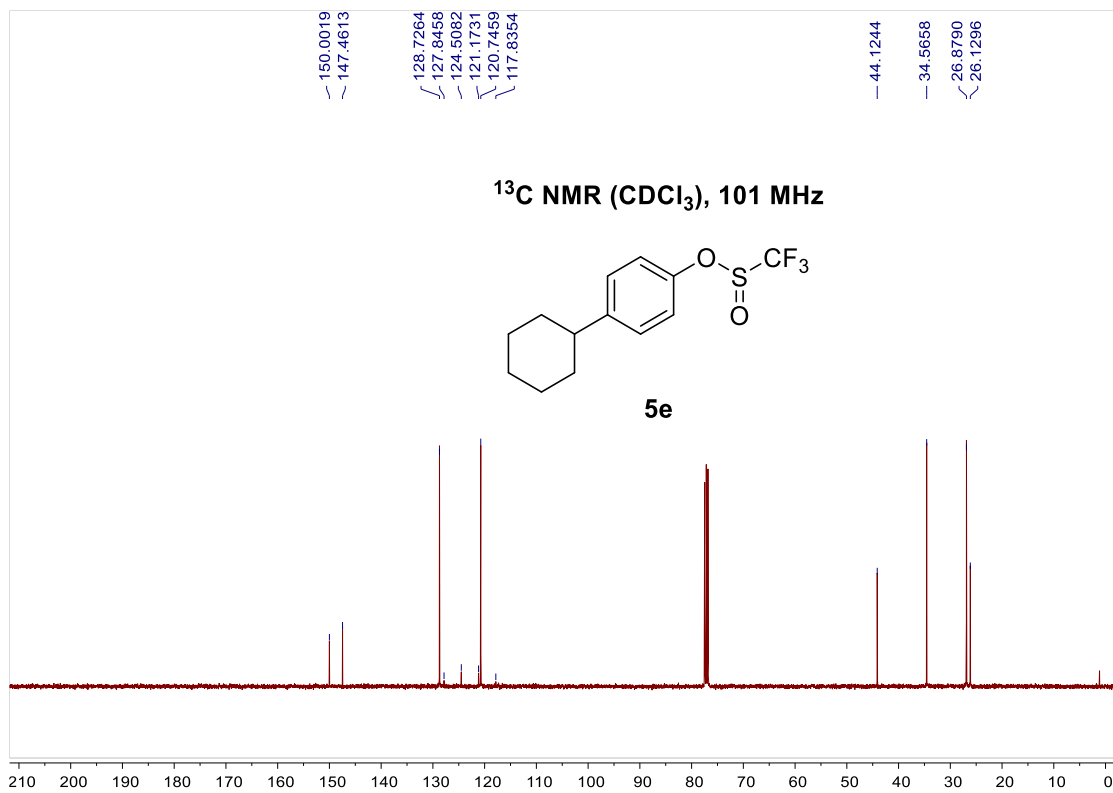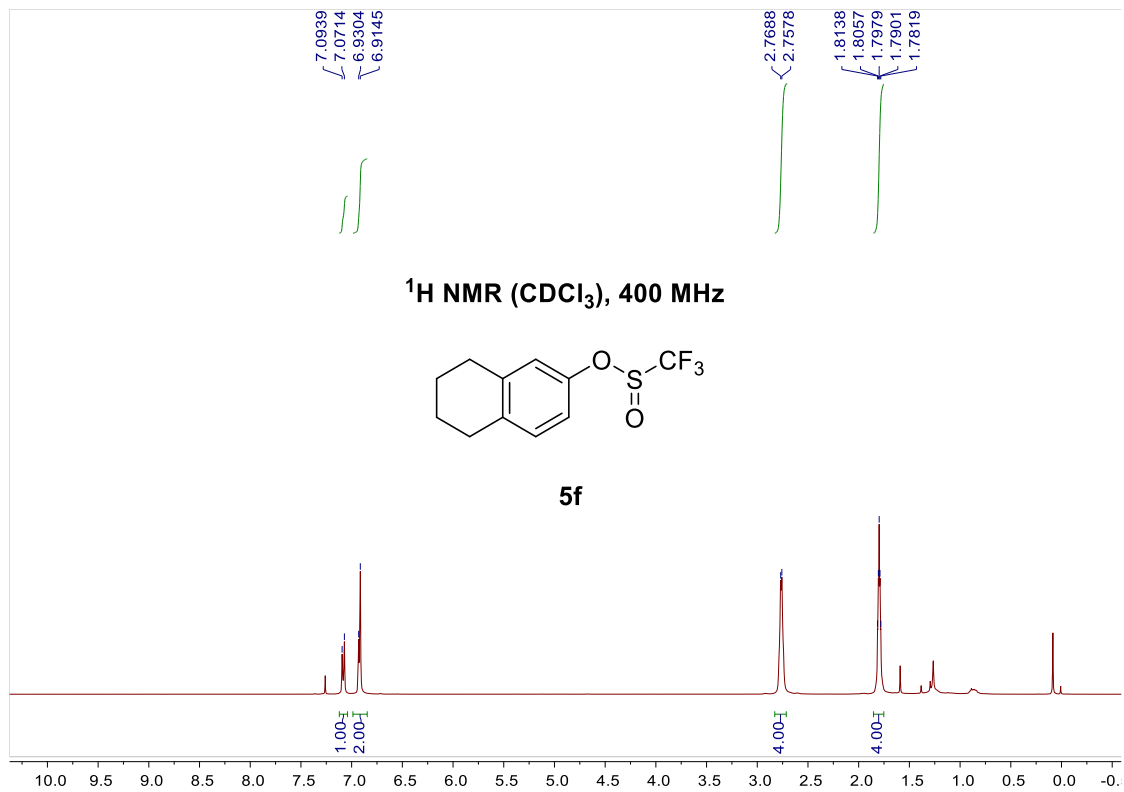

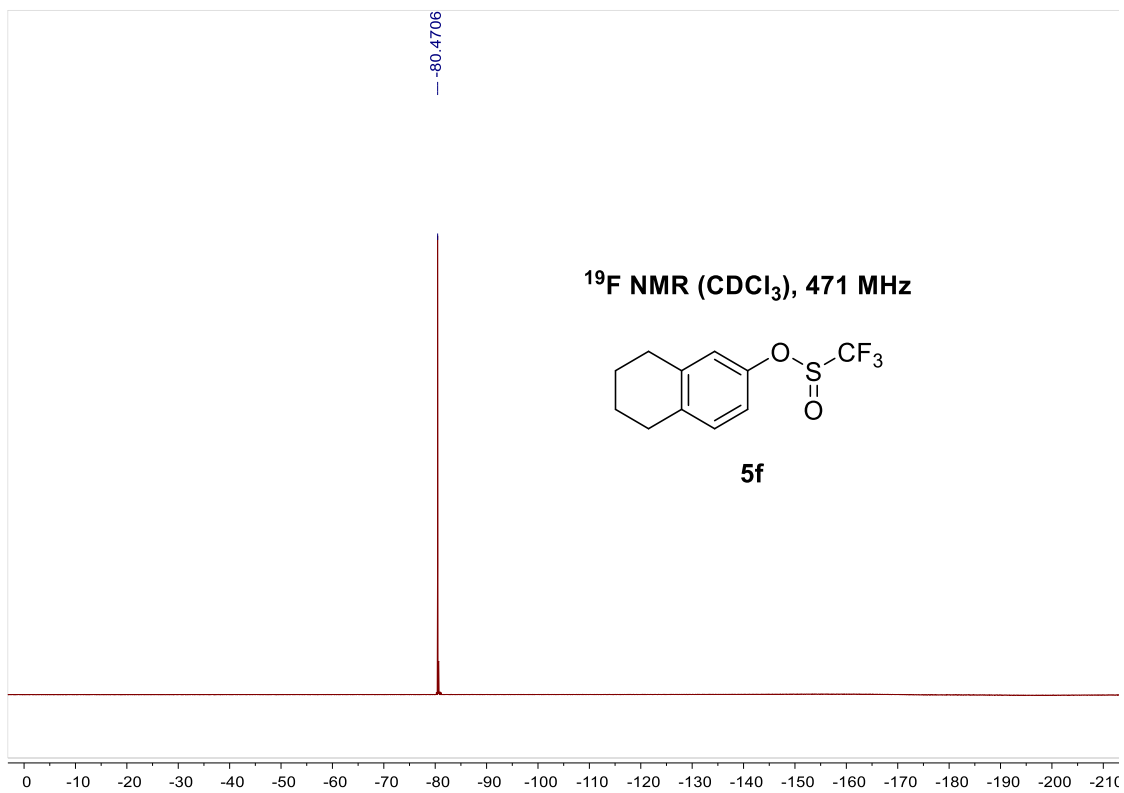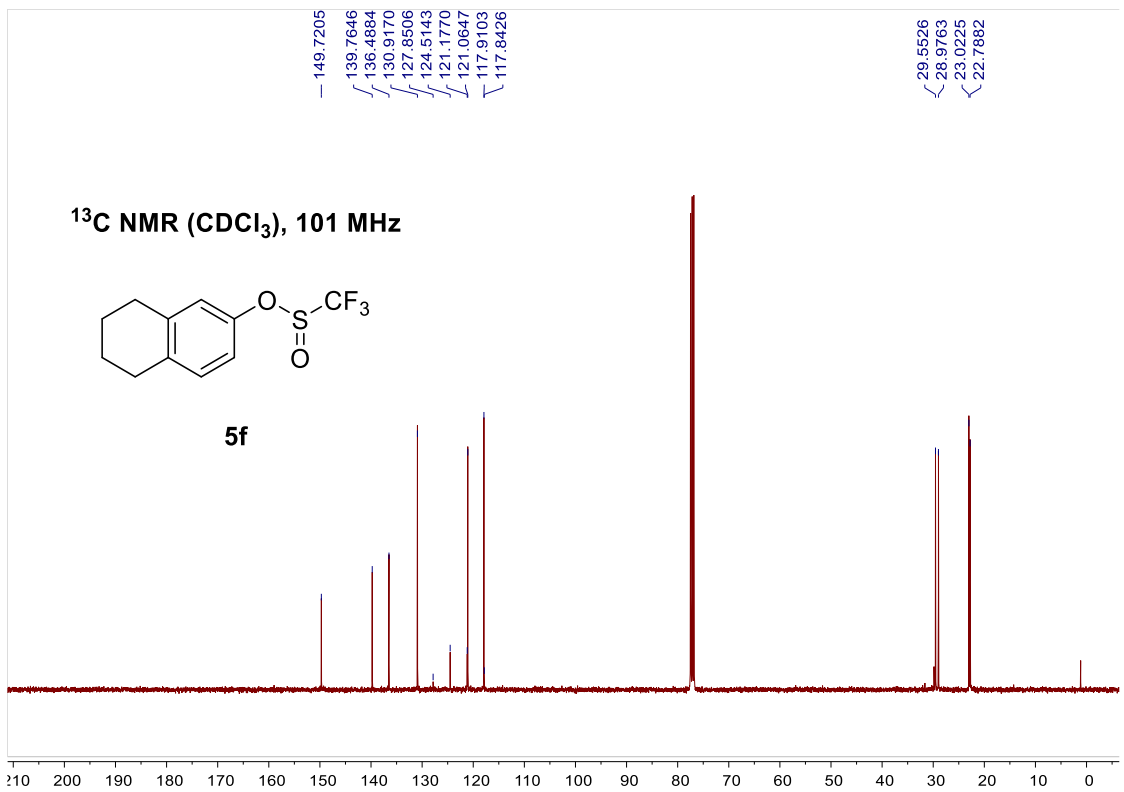

**<sup>1</sup>H NMR (CDCl<sub>3</sub>), 400 MHz**

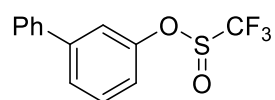

**5g**

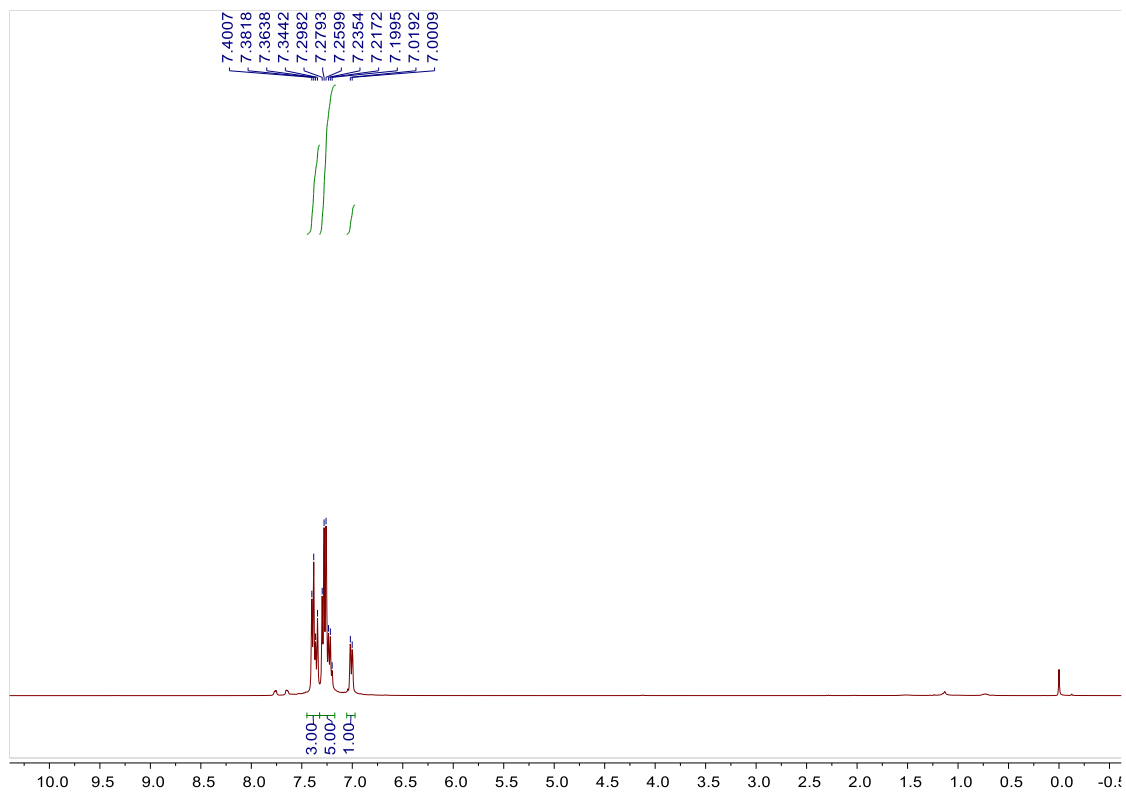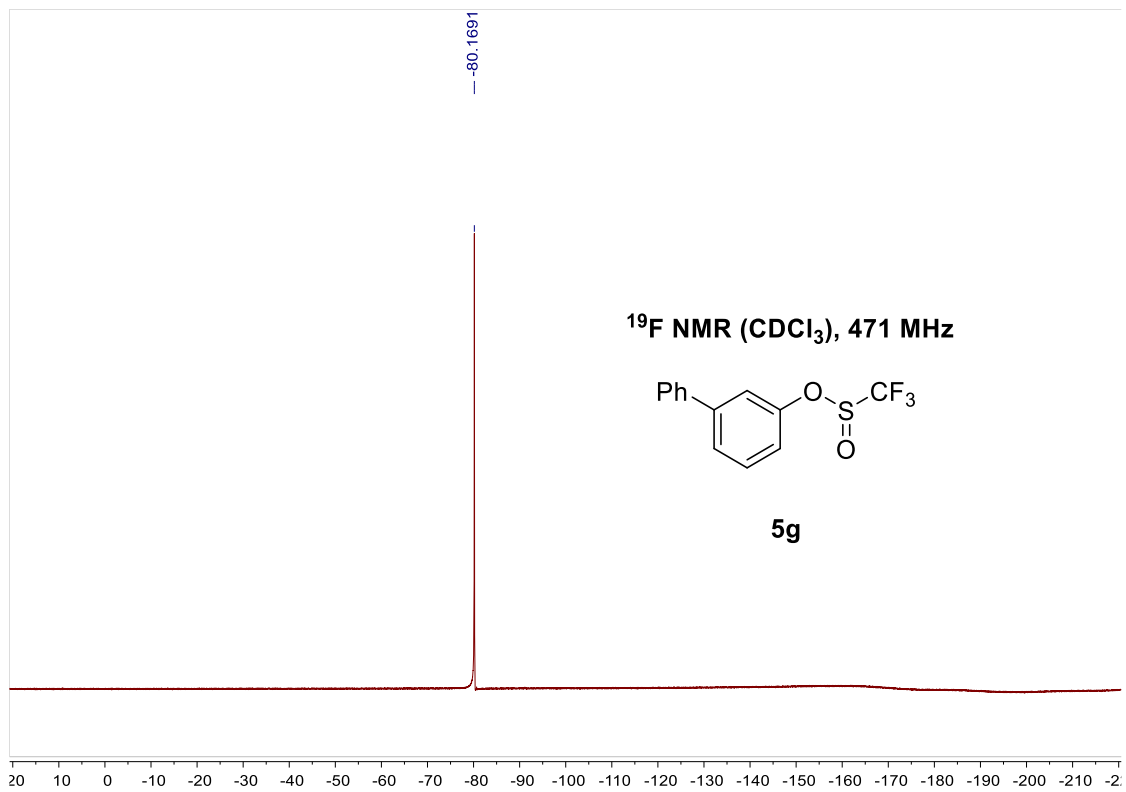

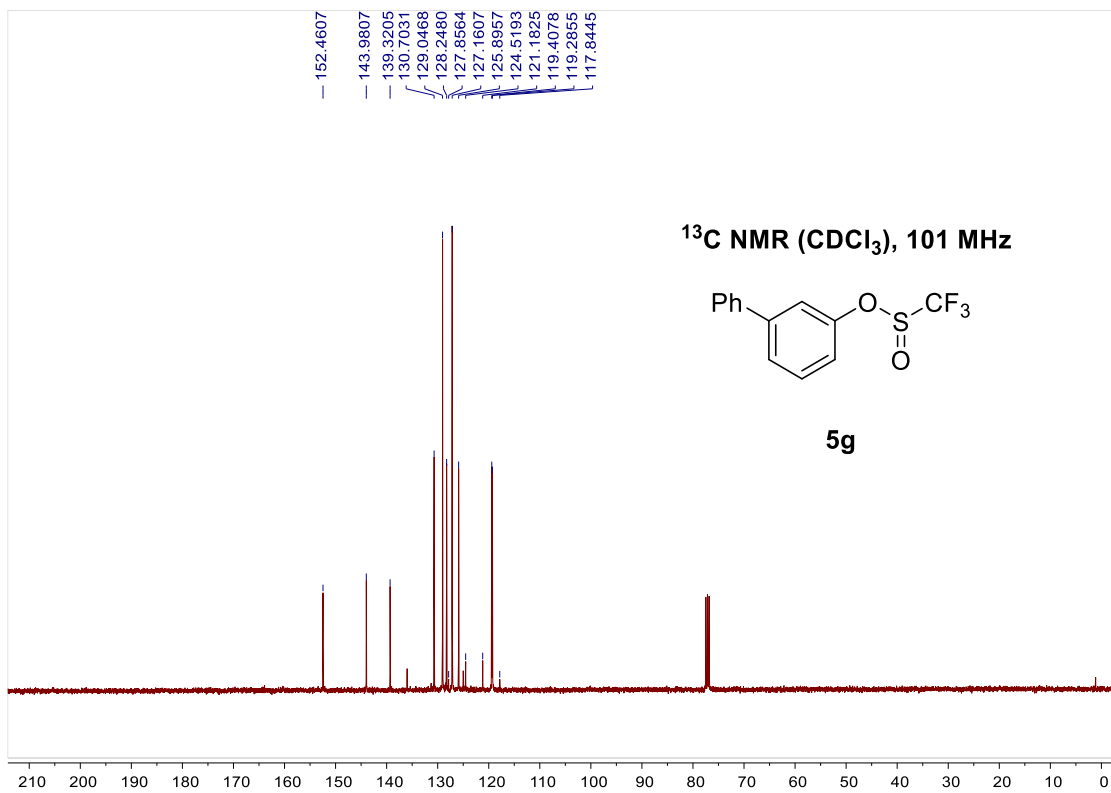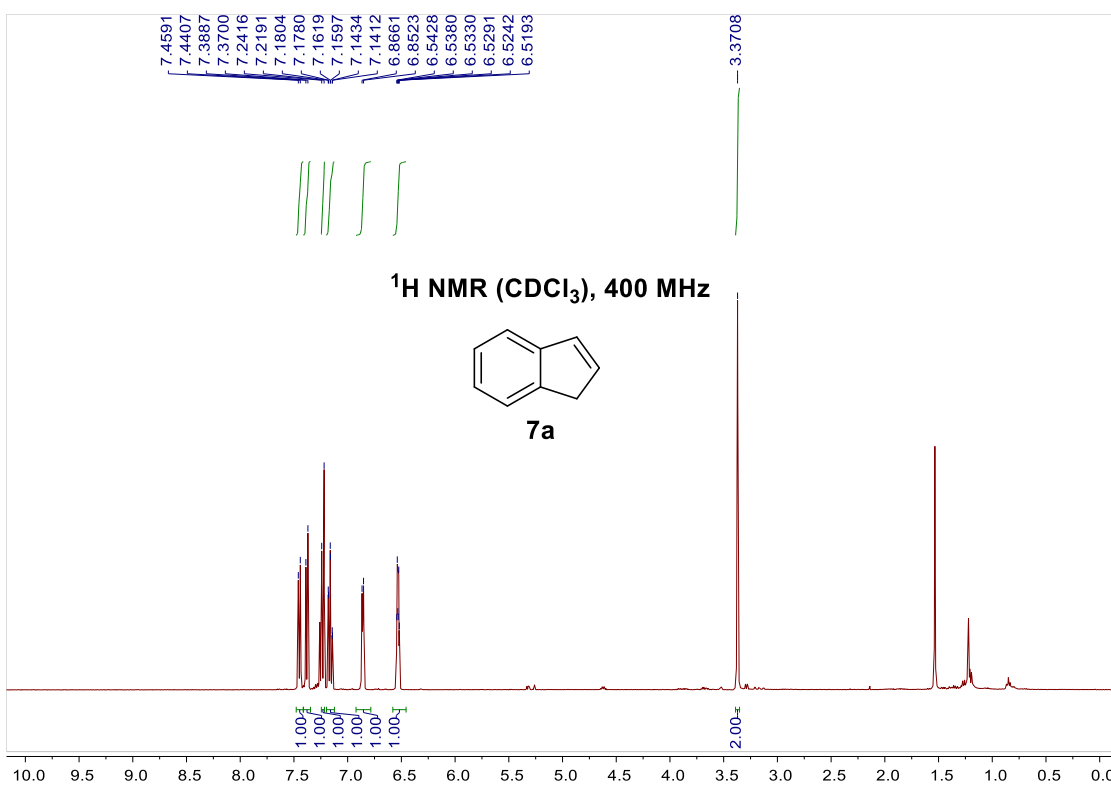

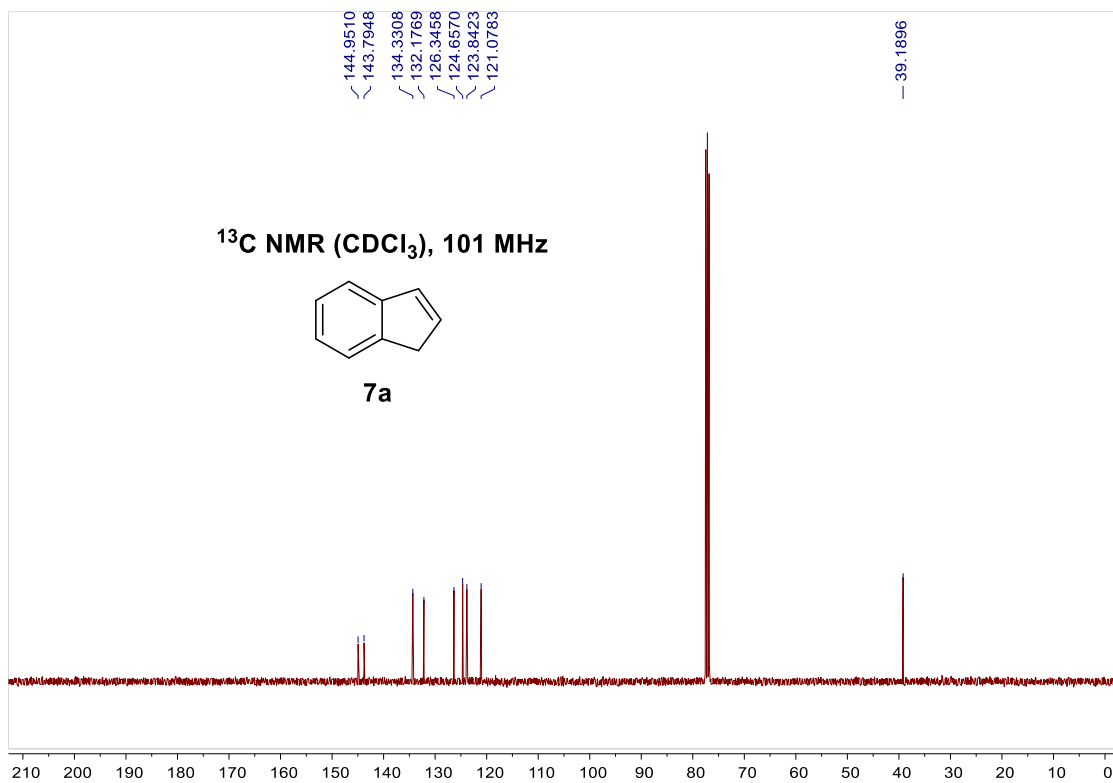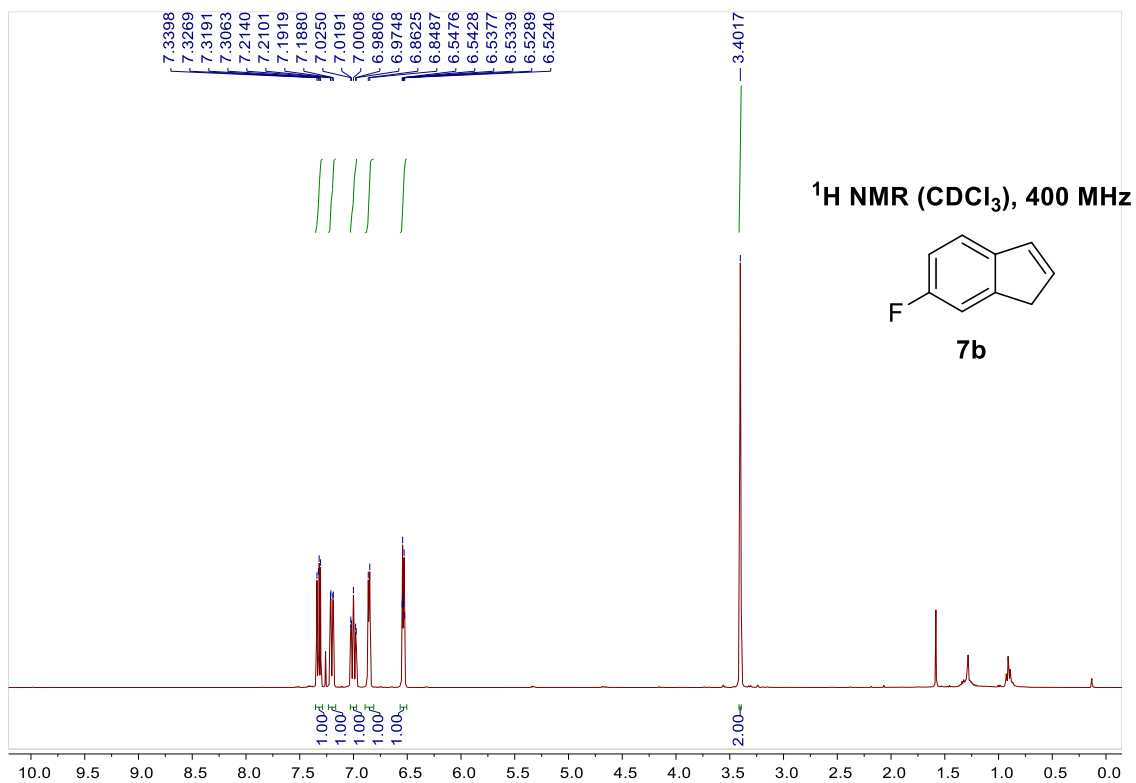

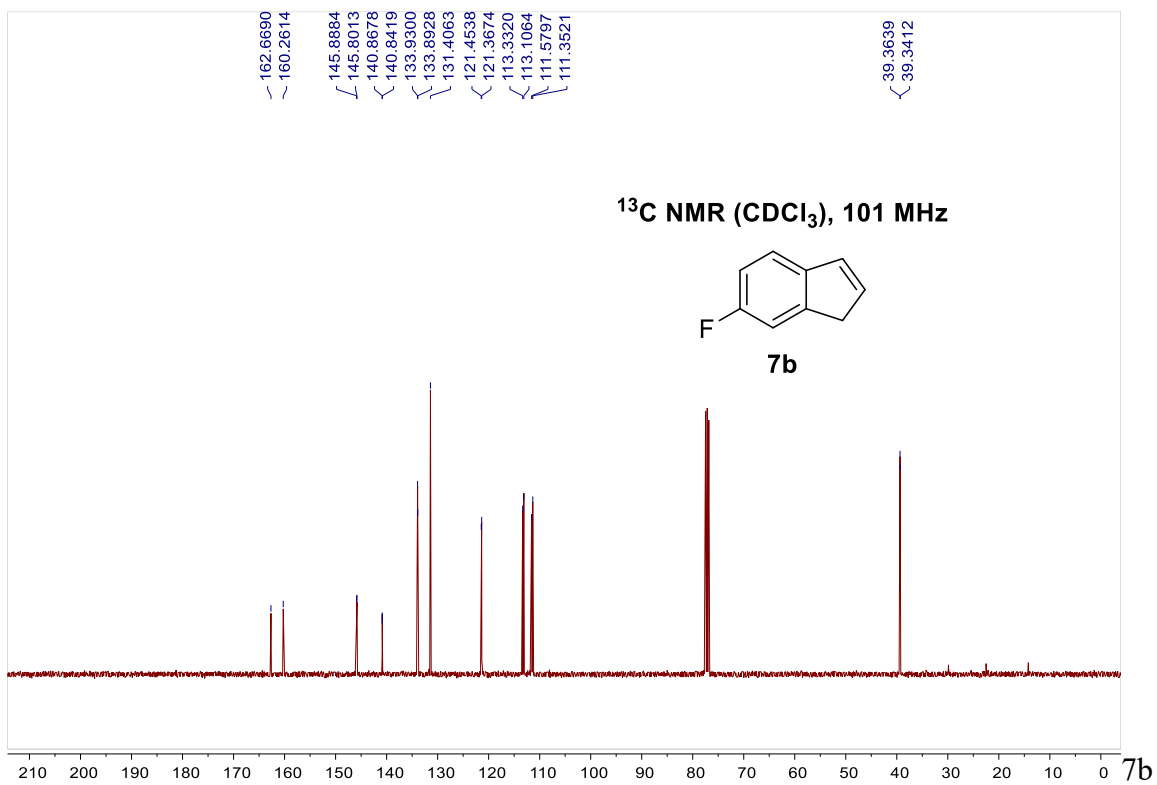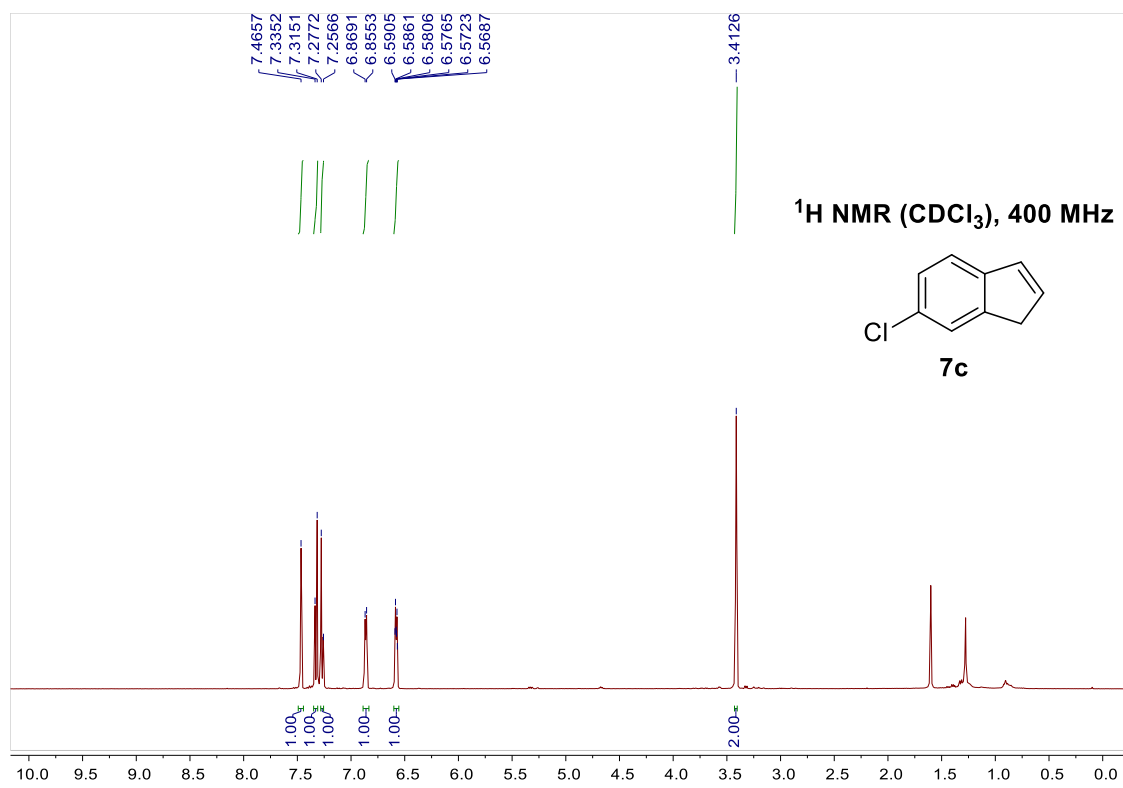

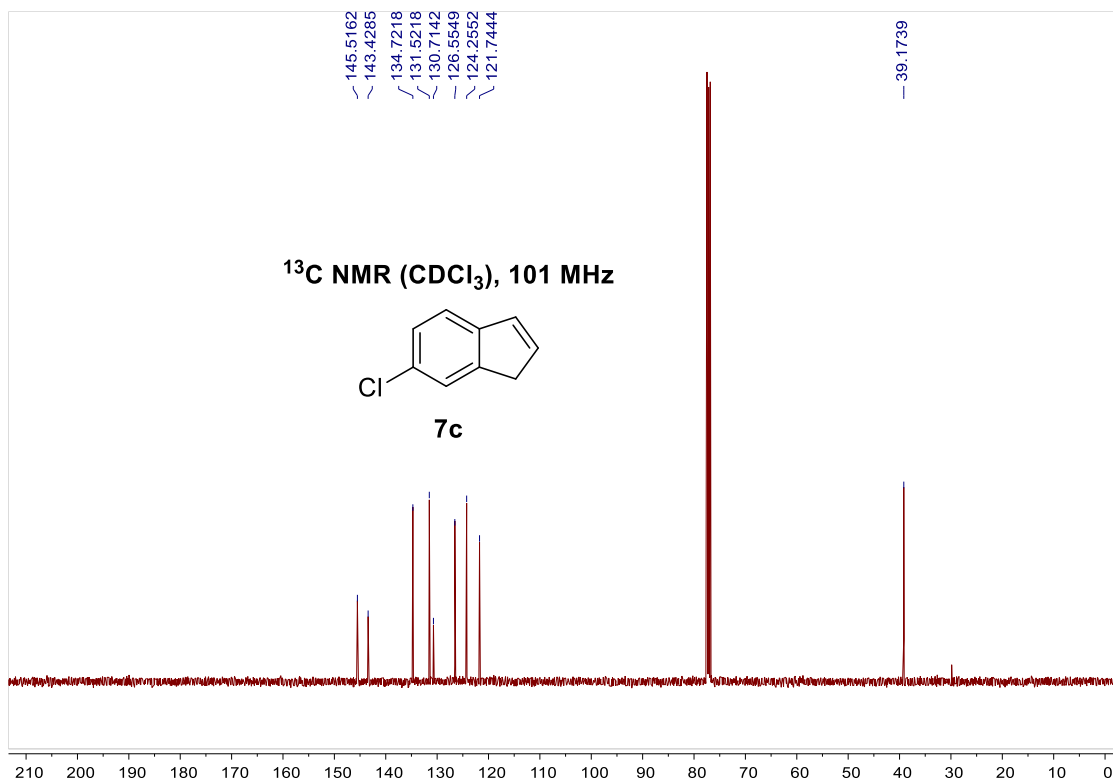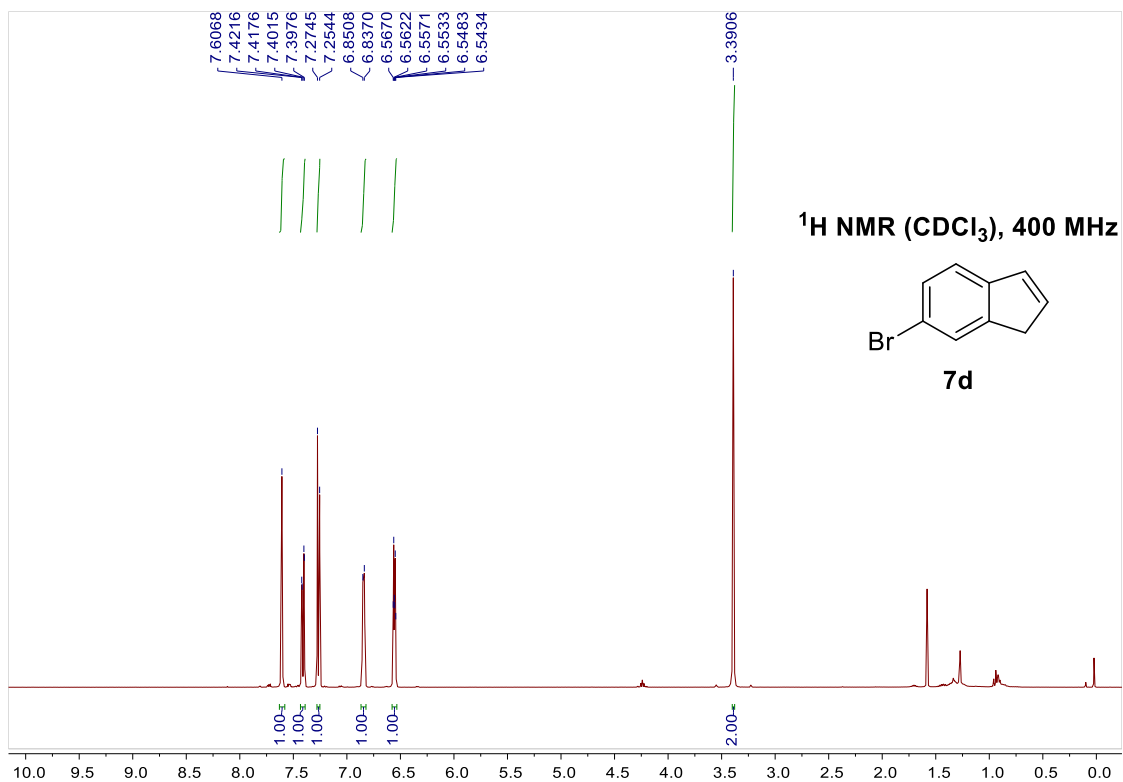



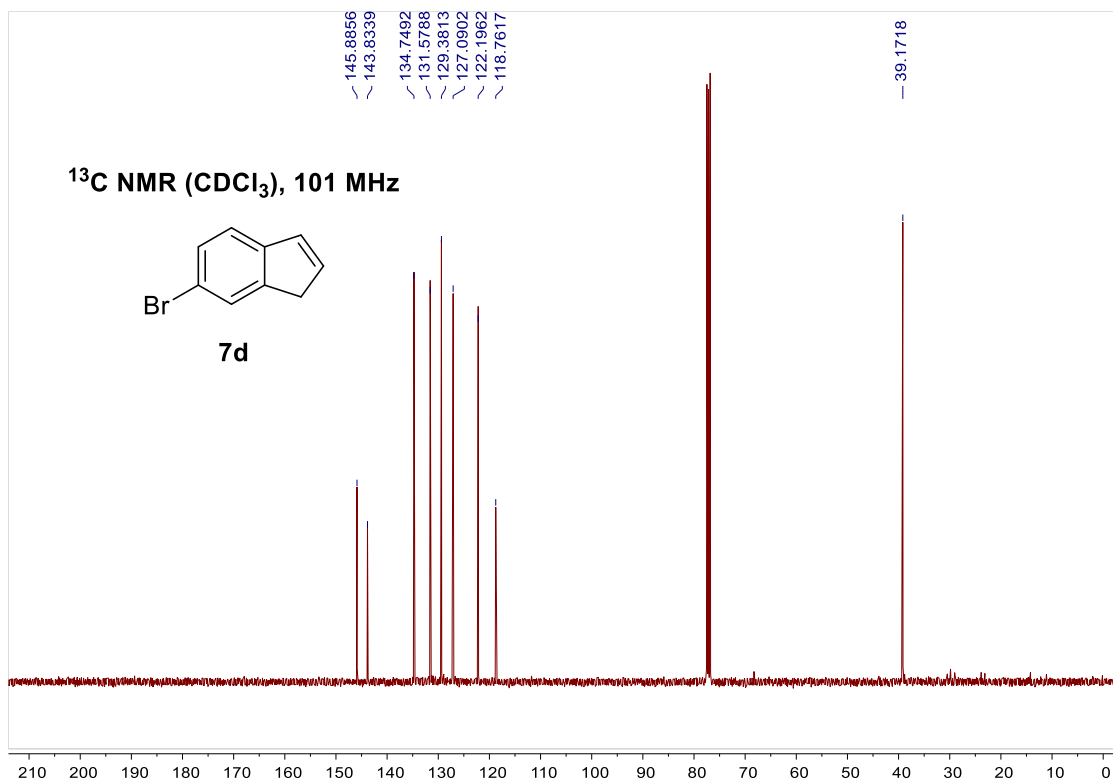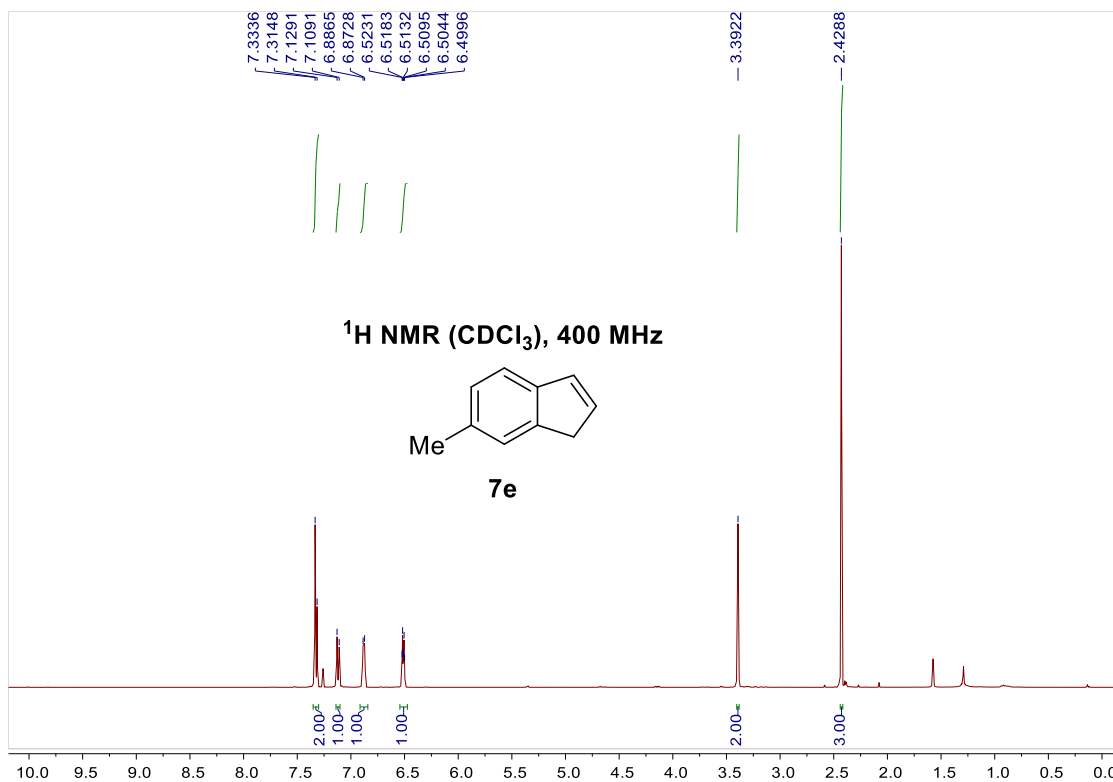

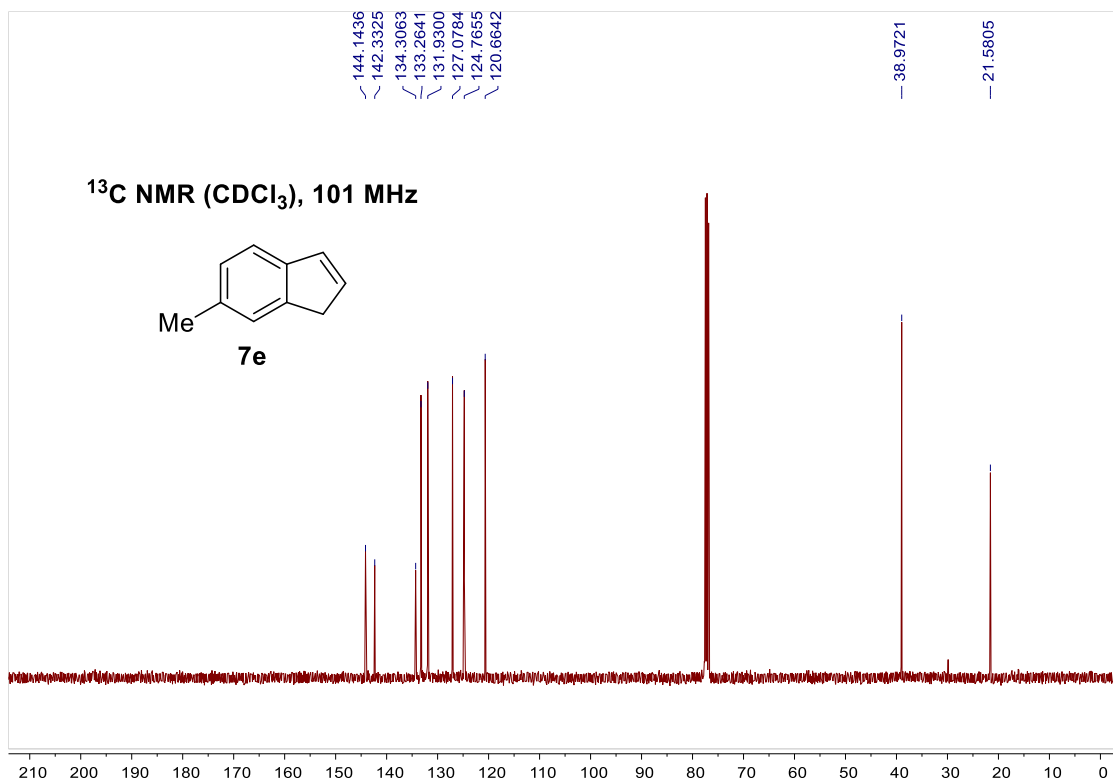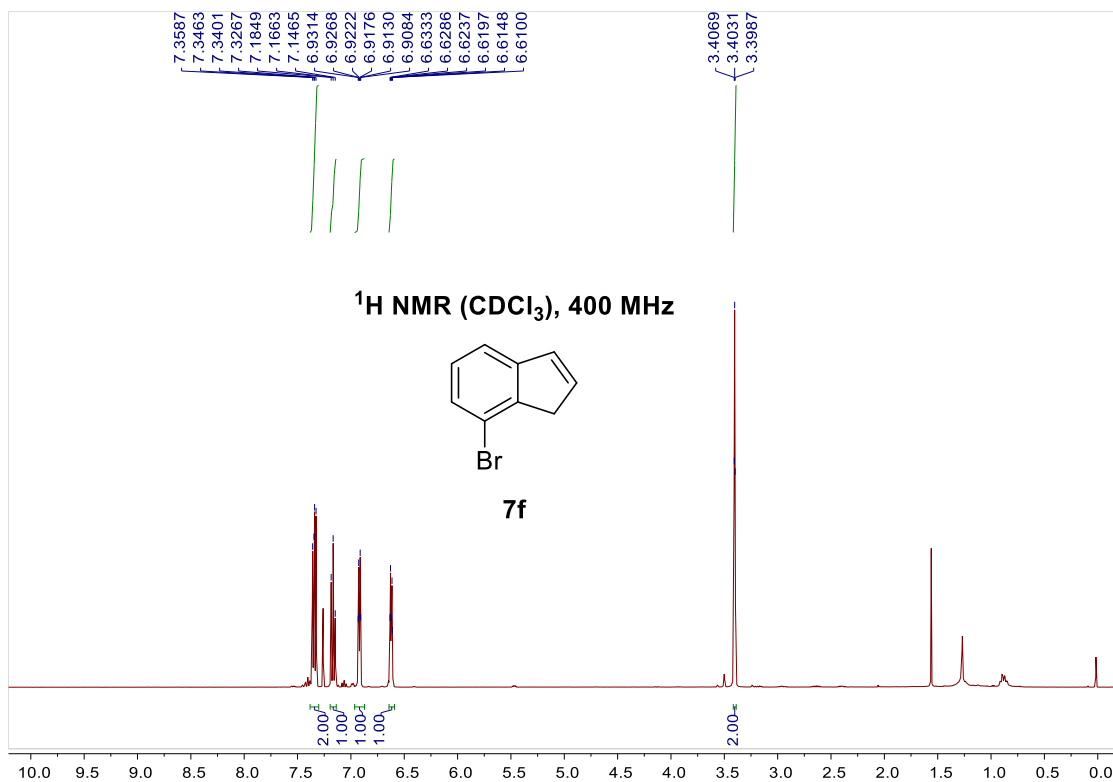

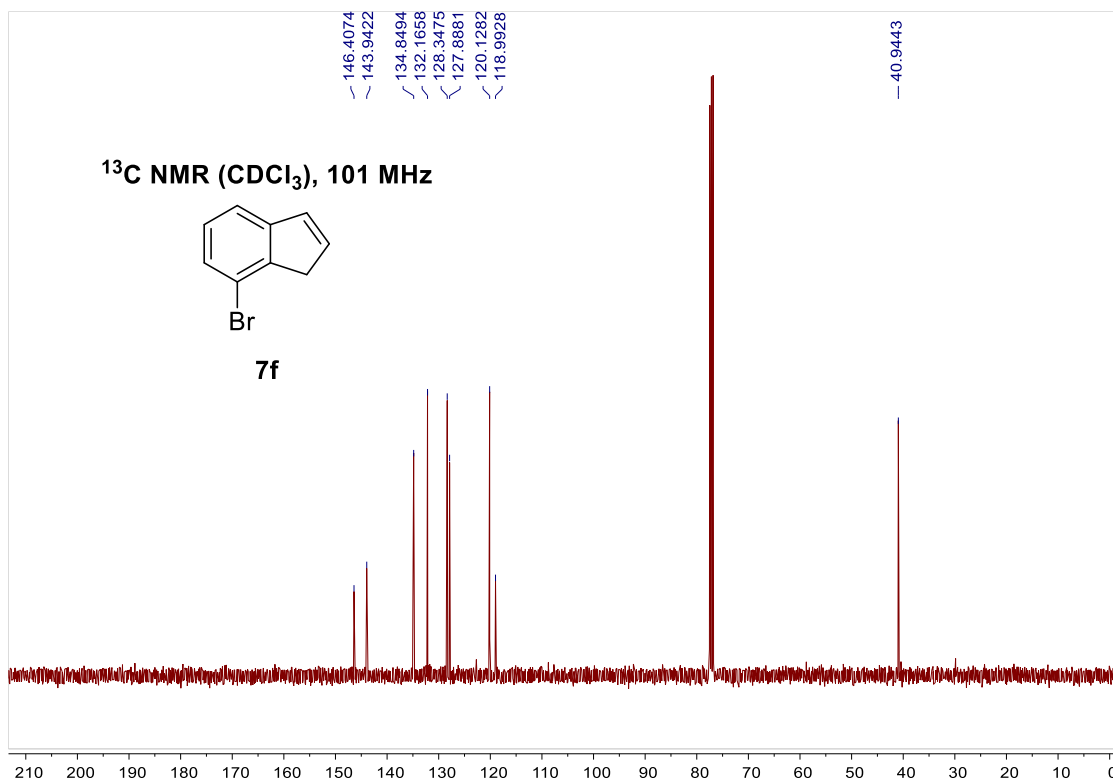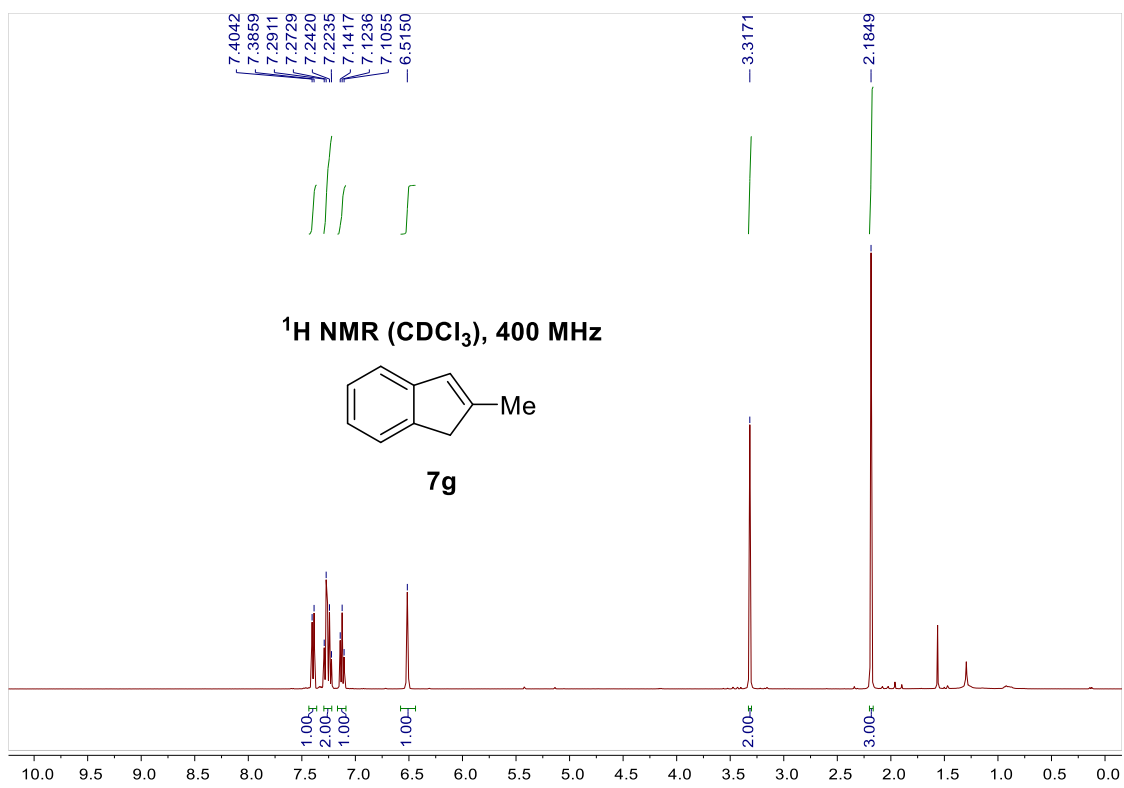

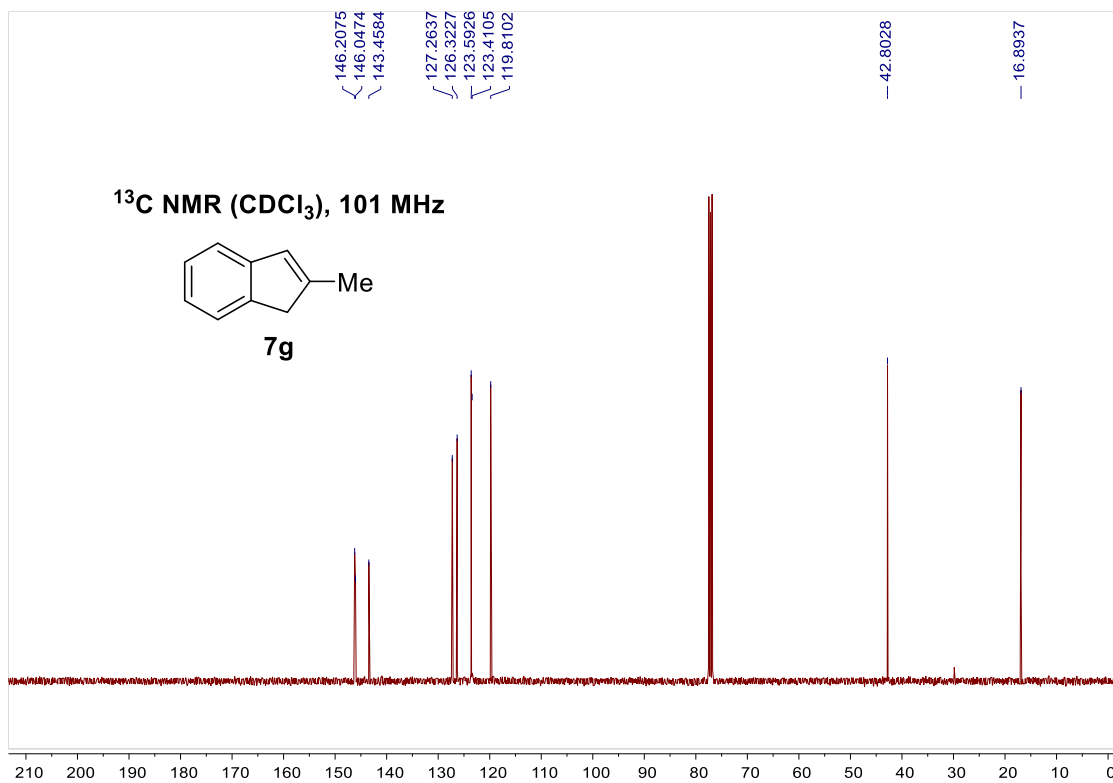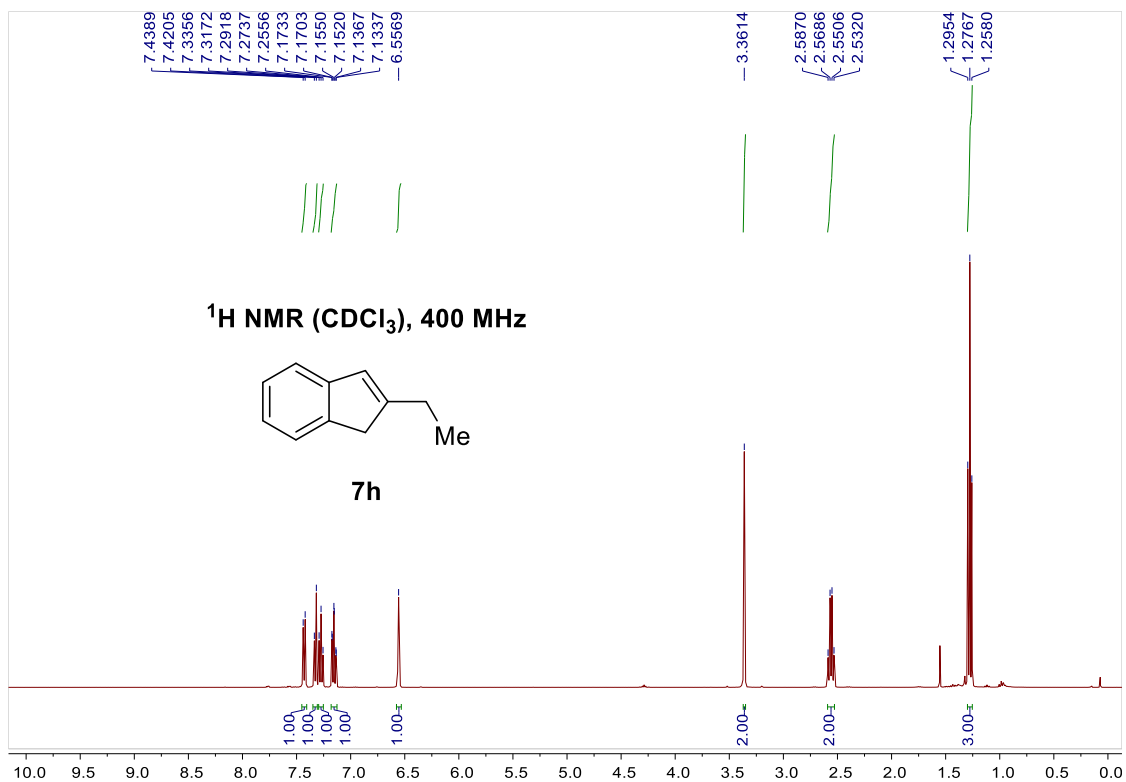

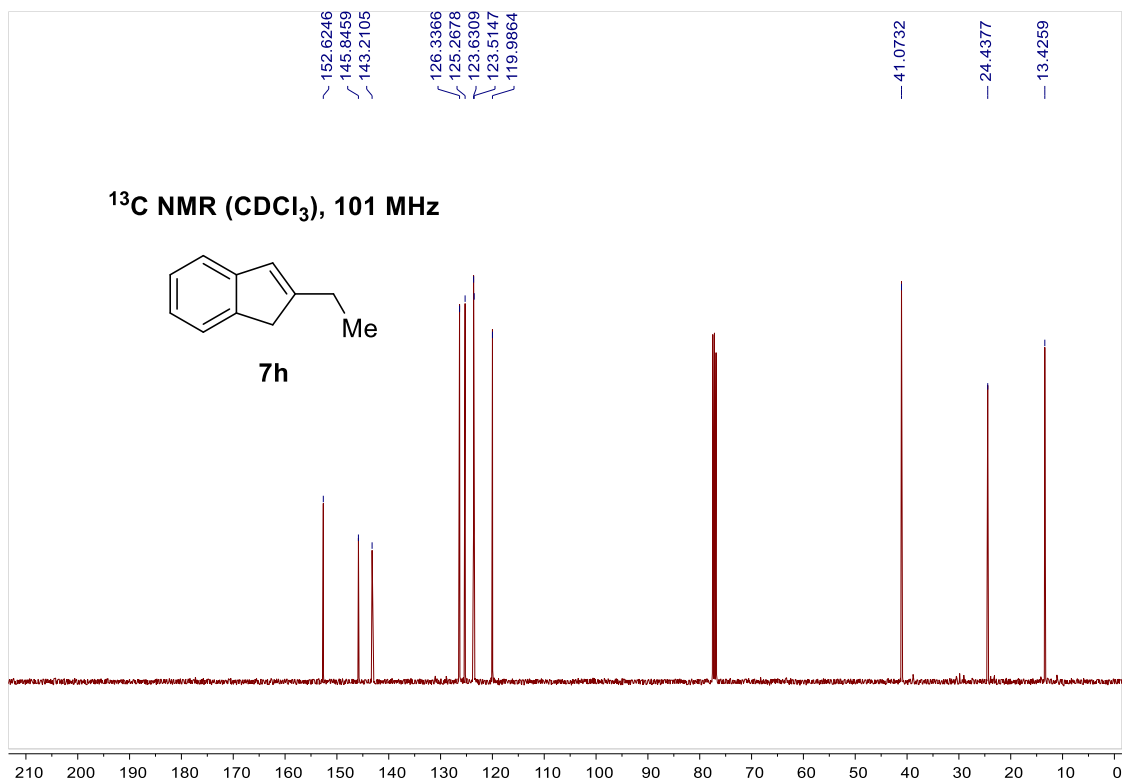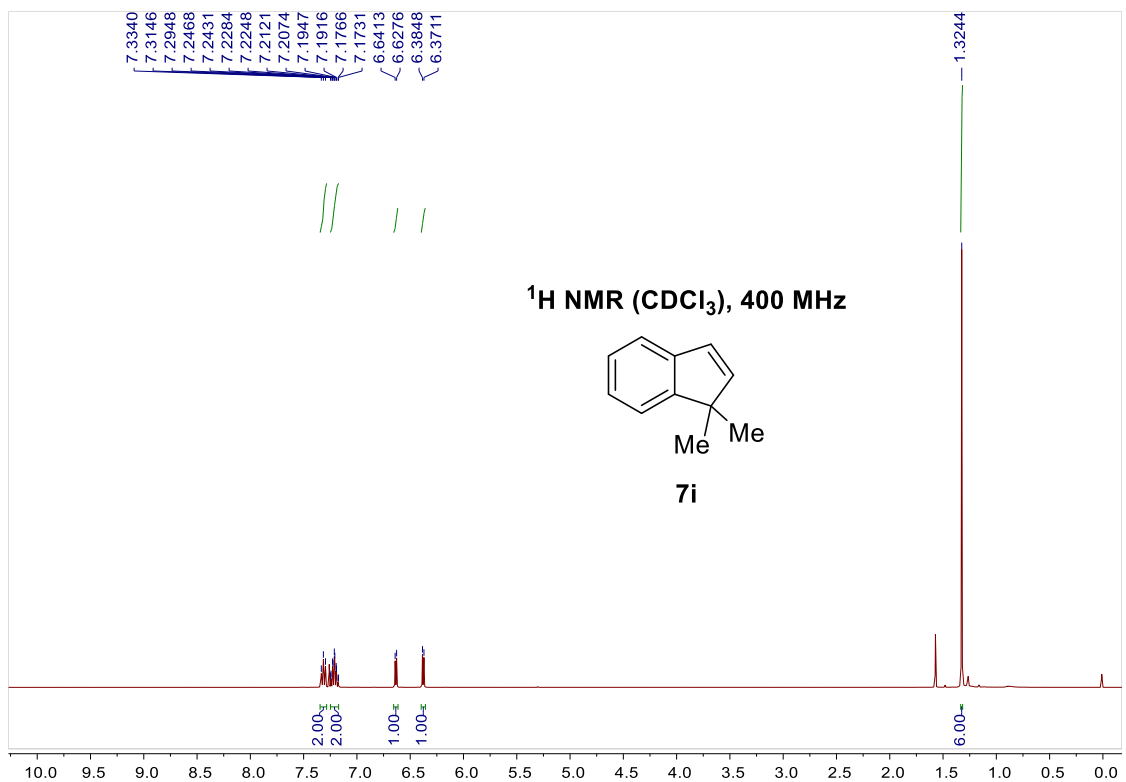

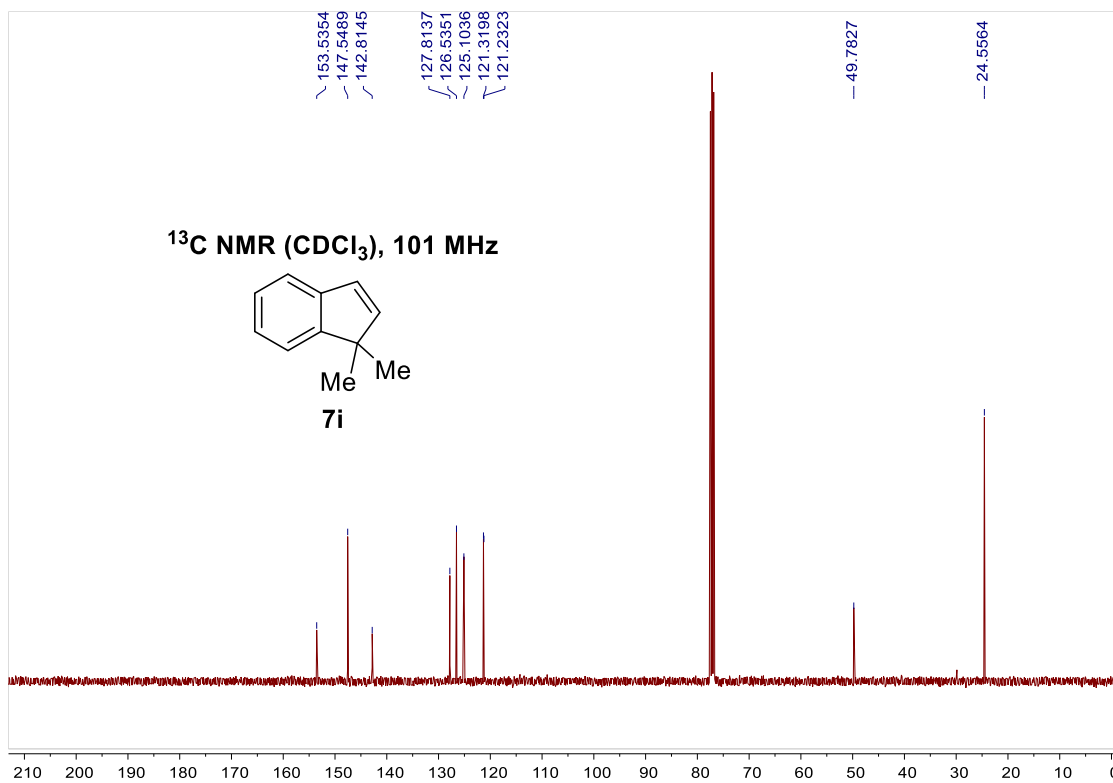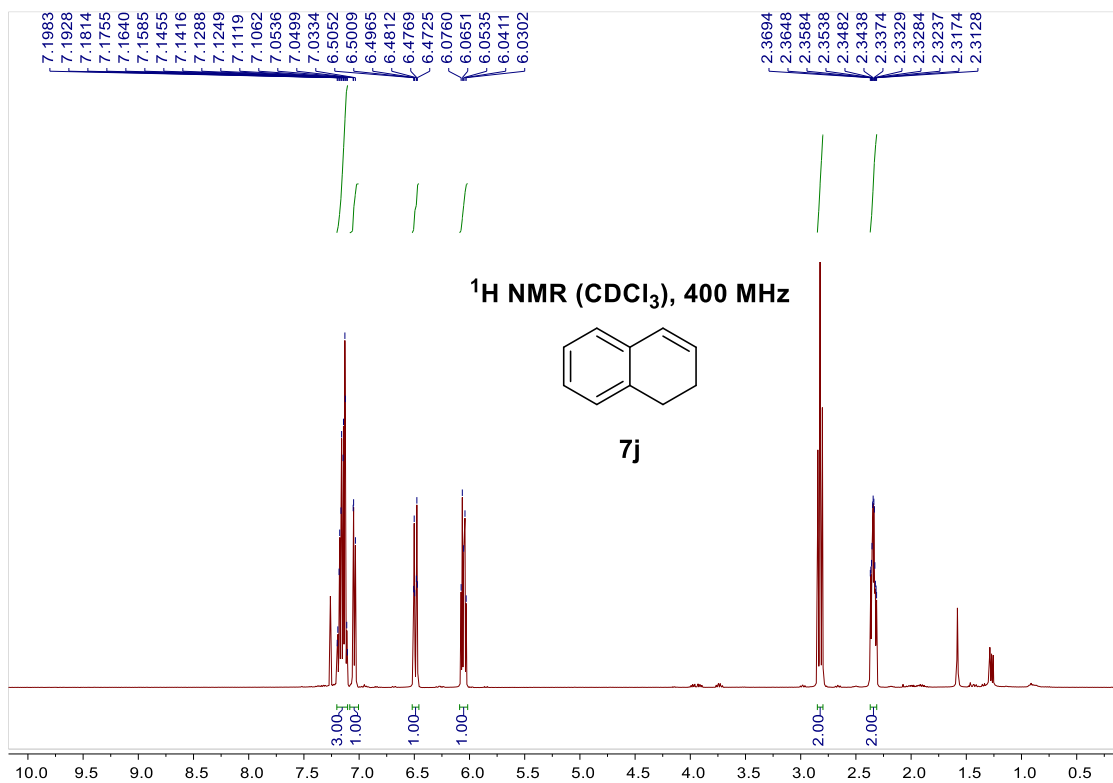

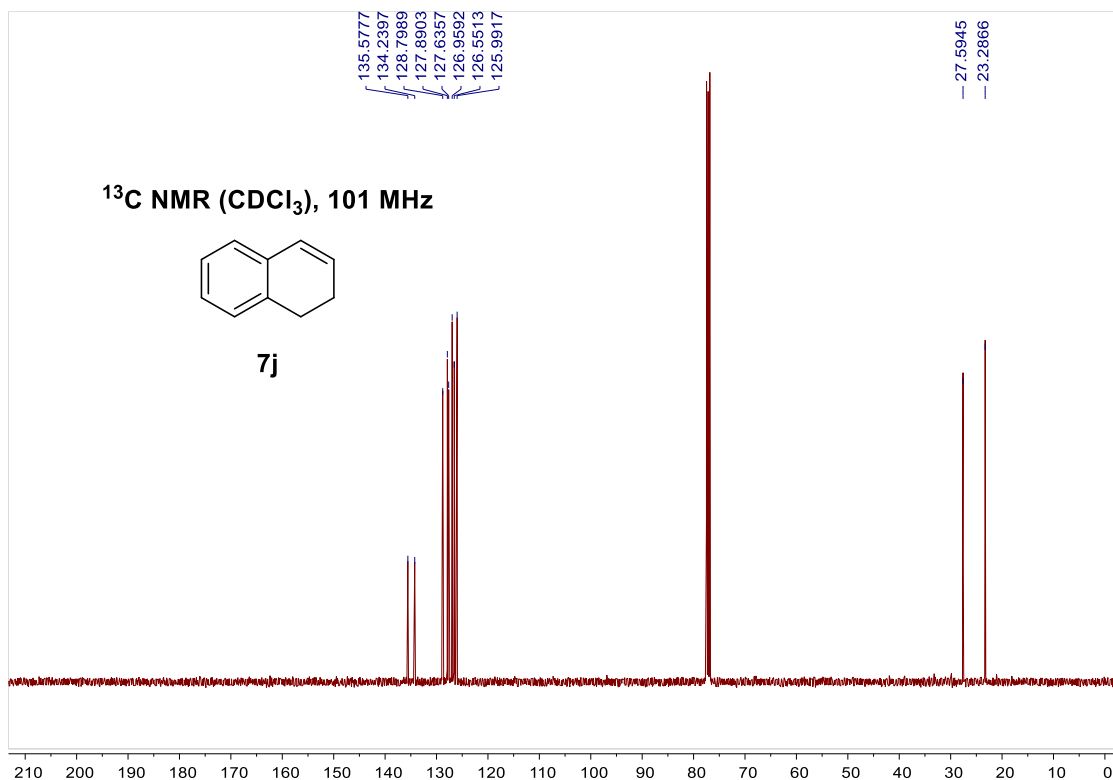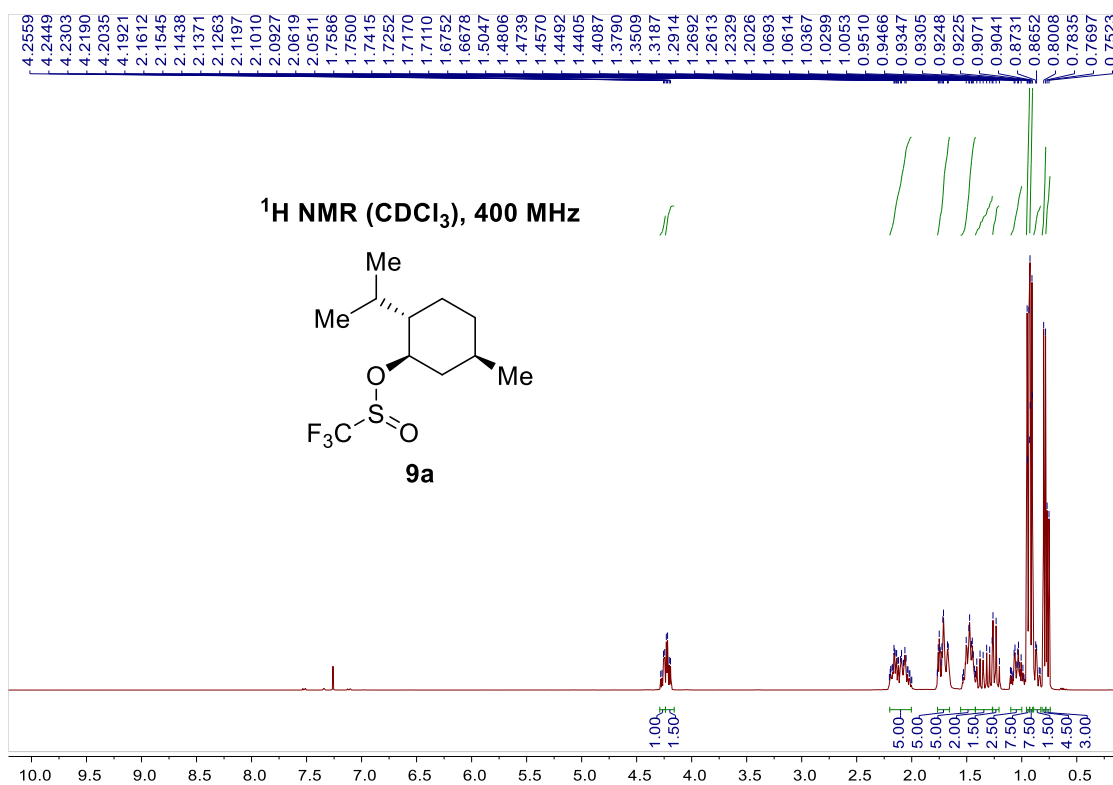

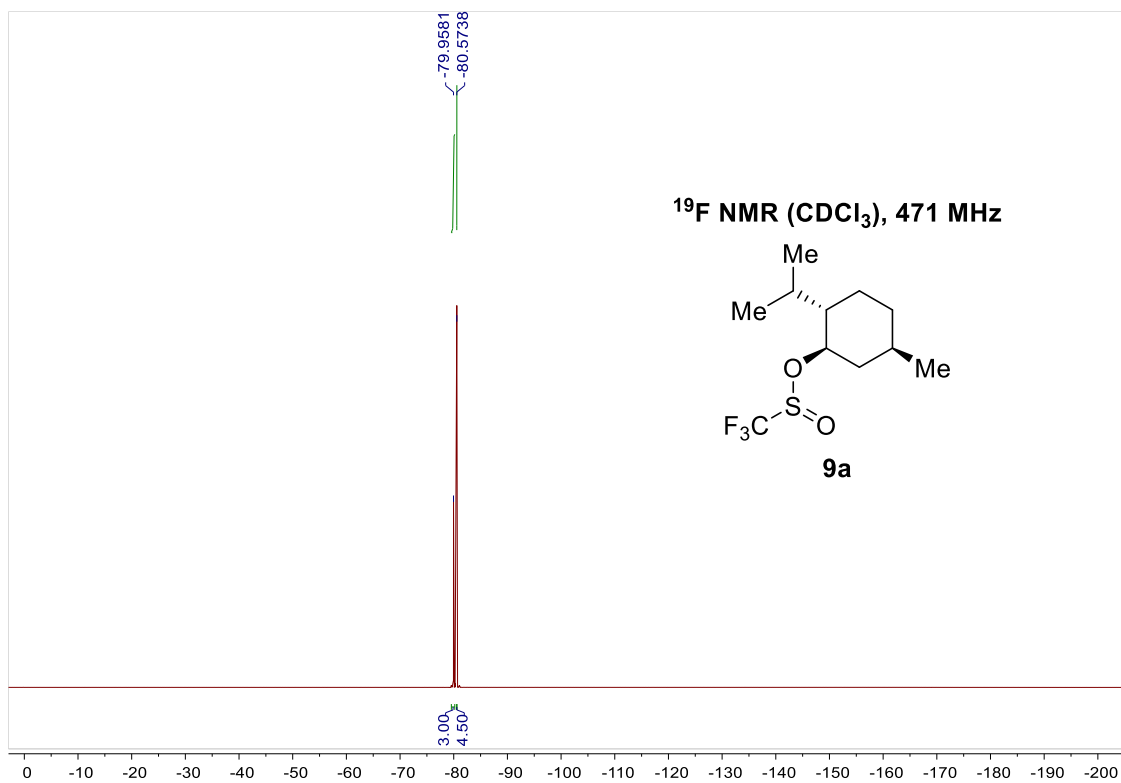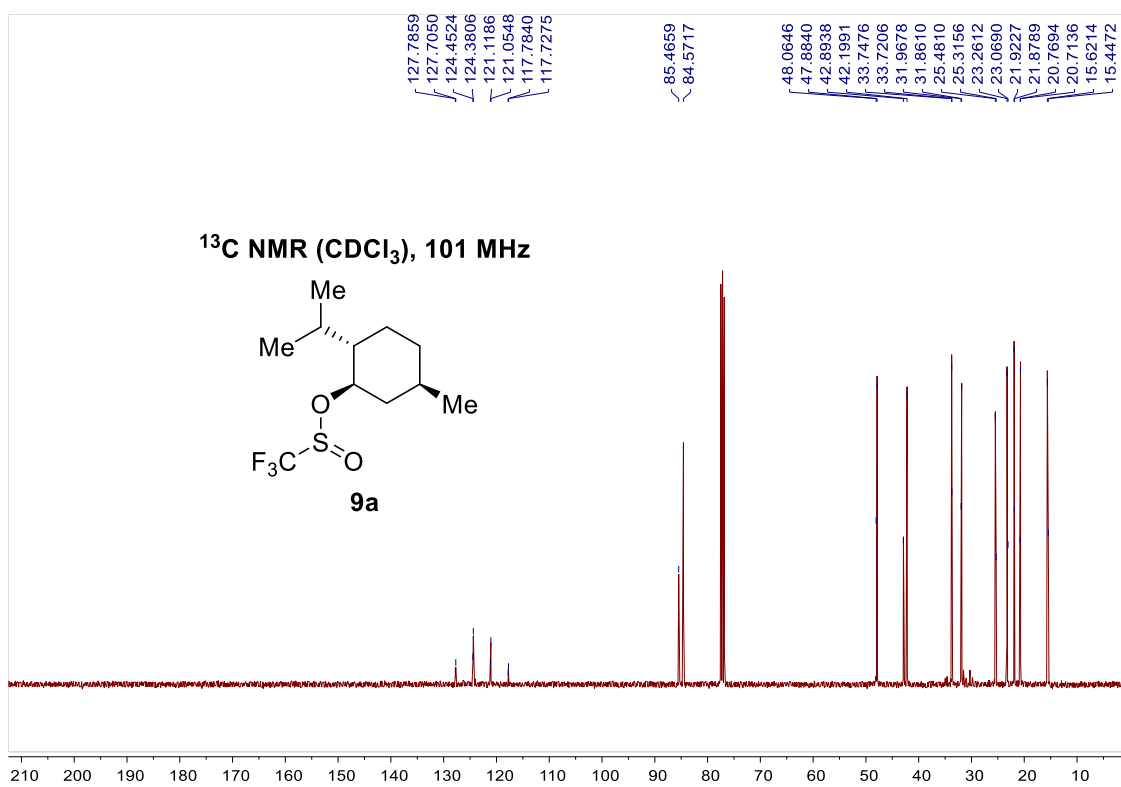



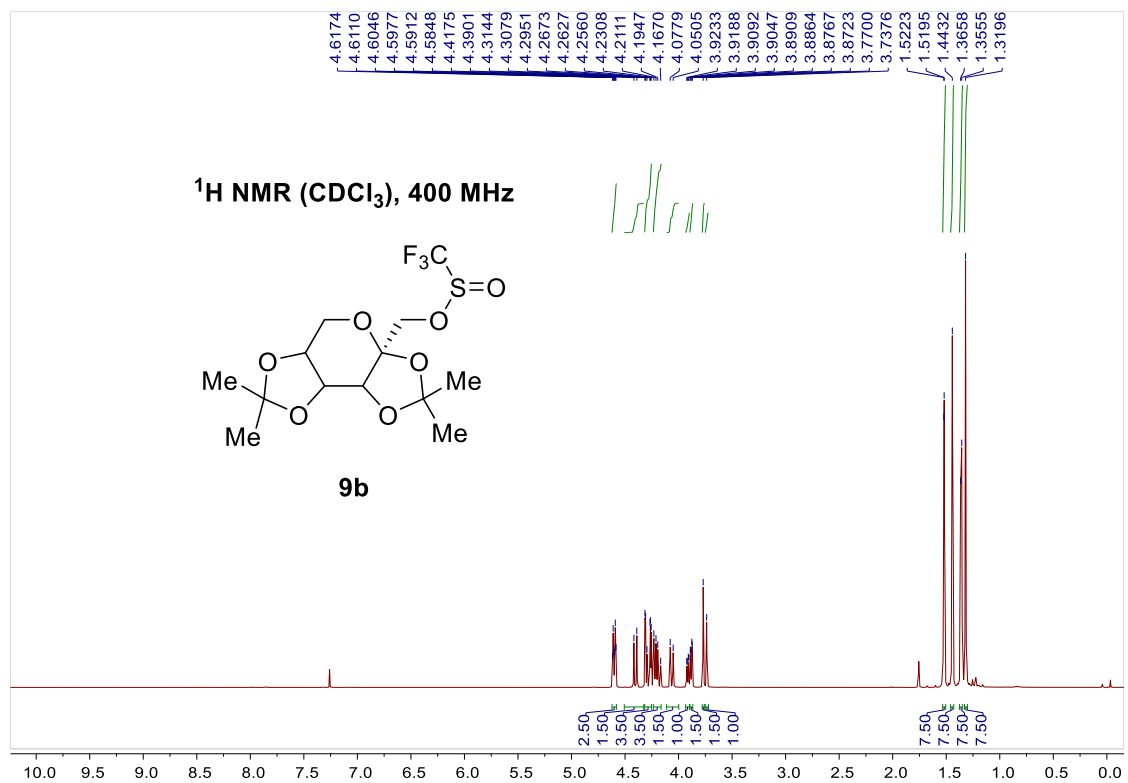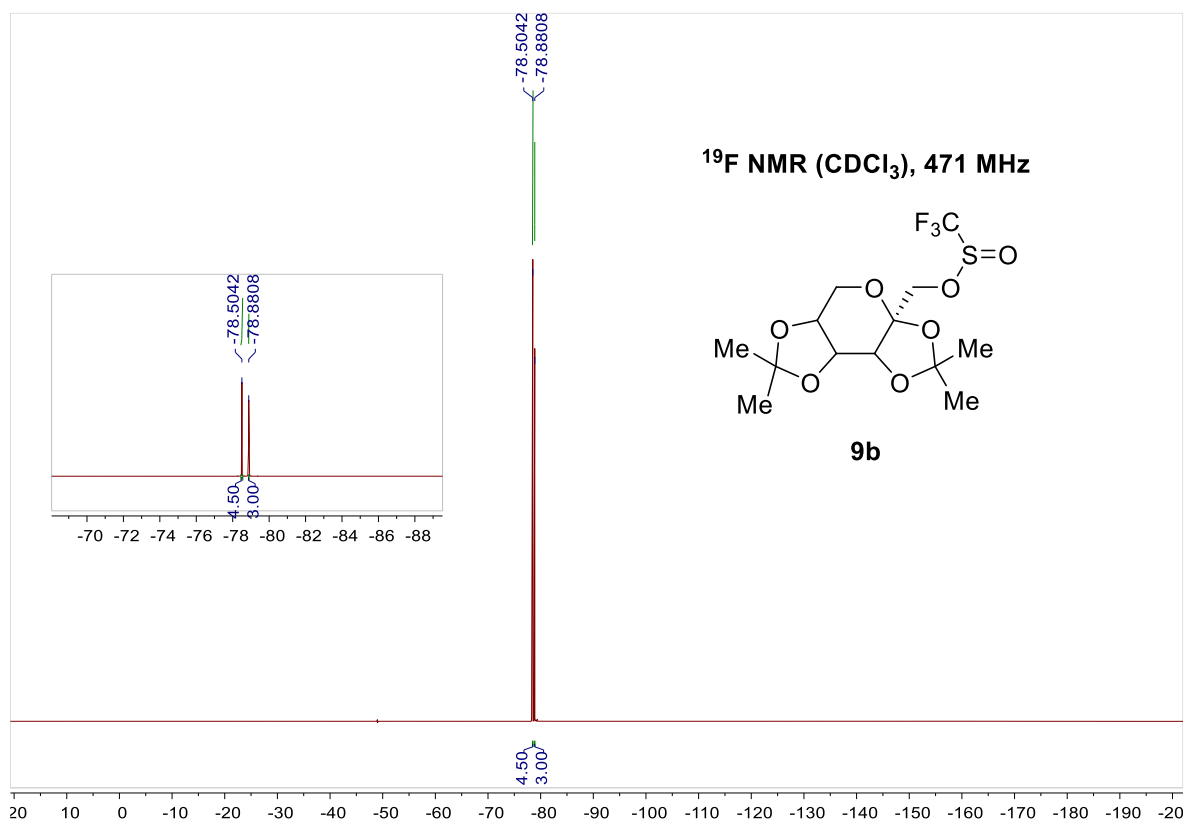

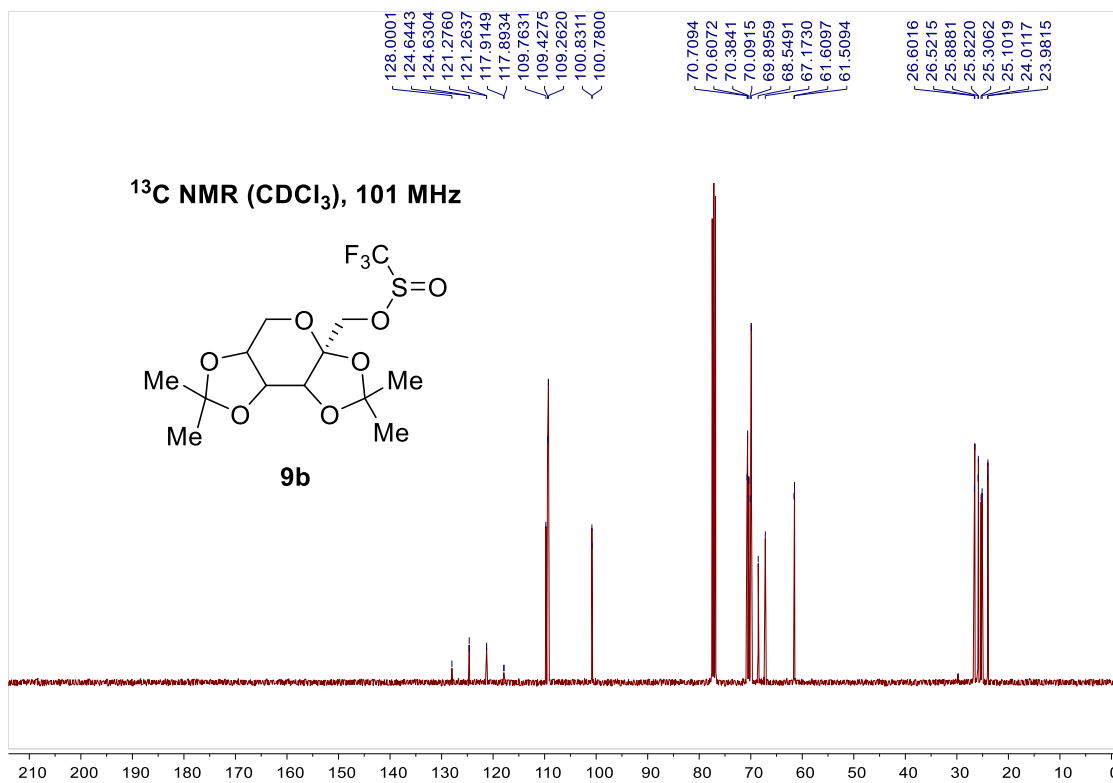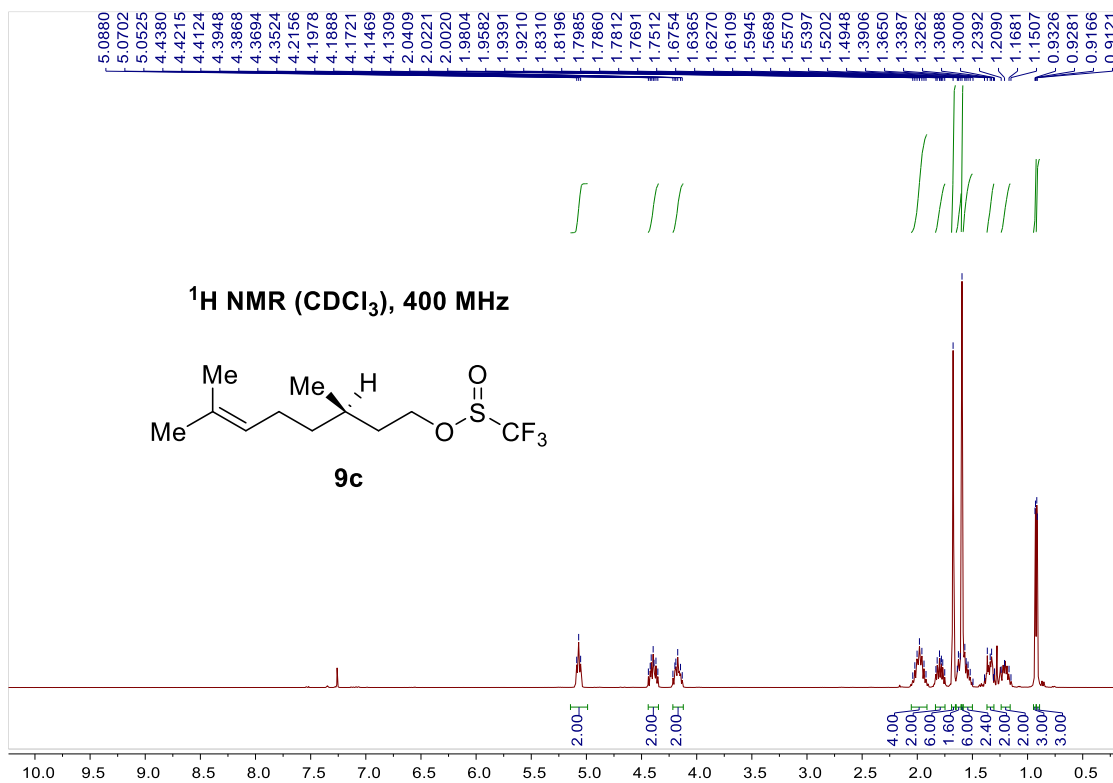

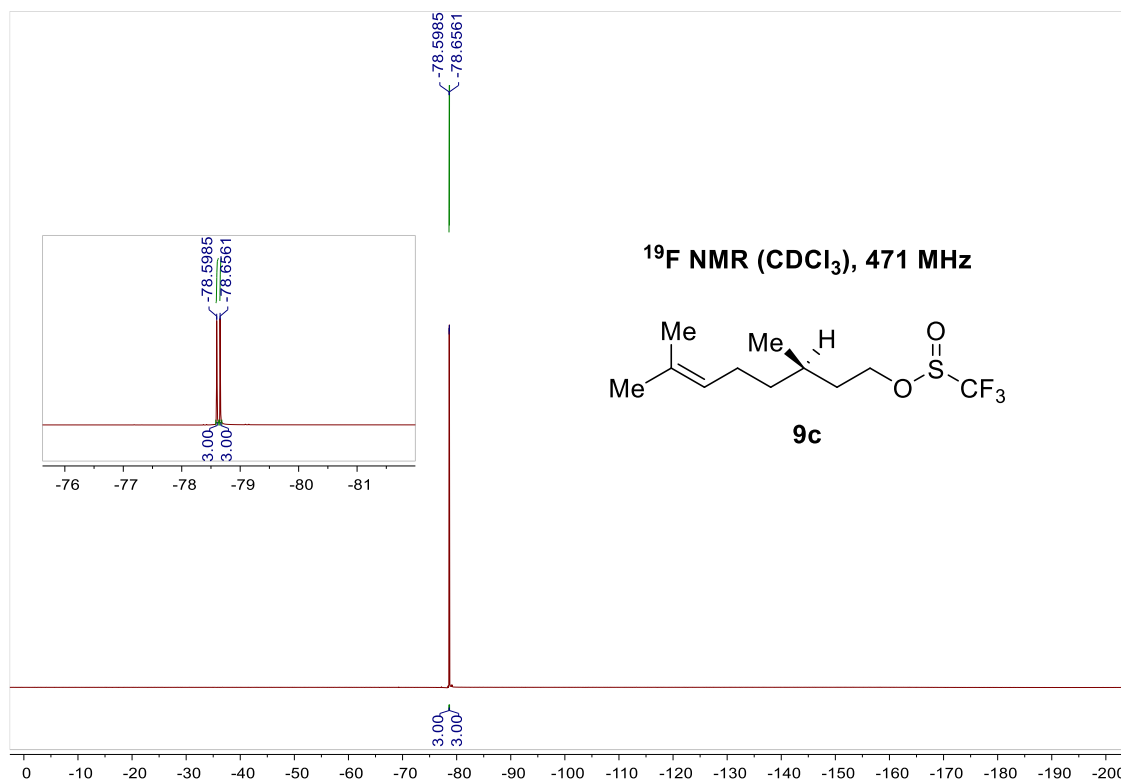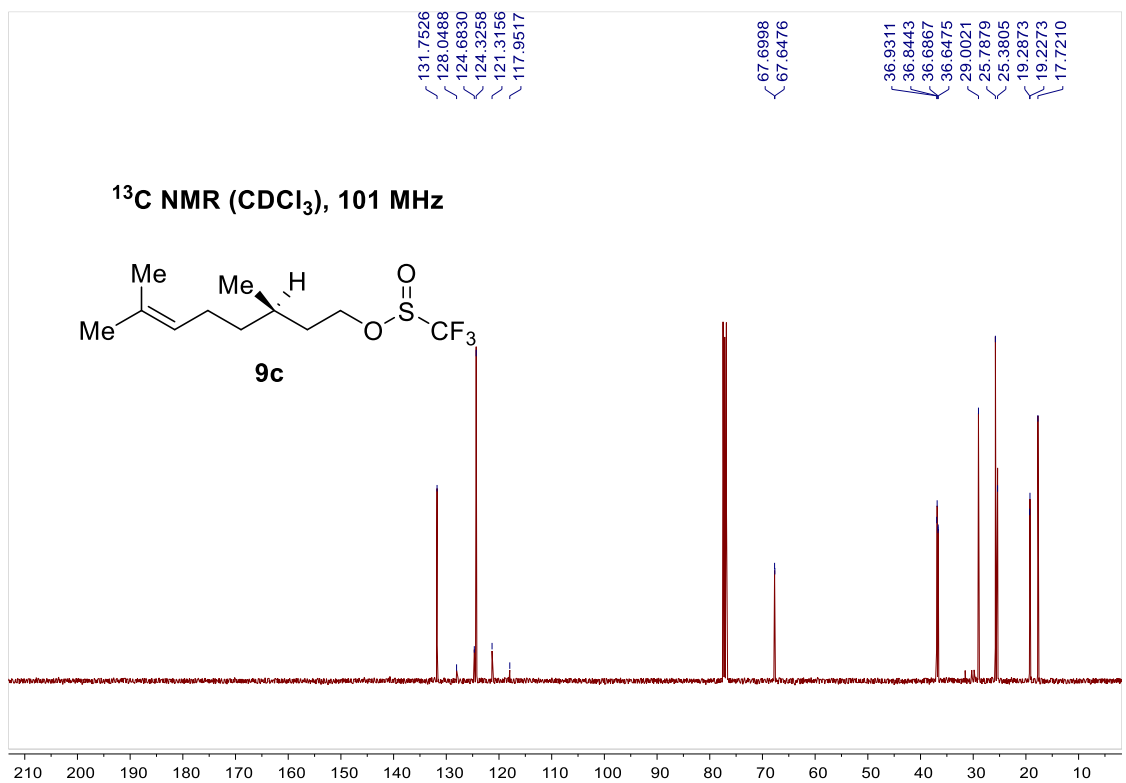

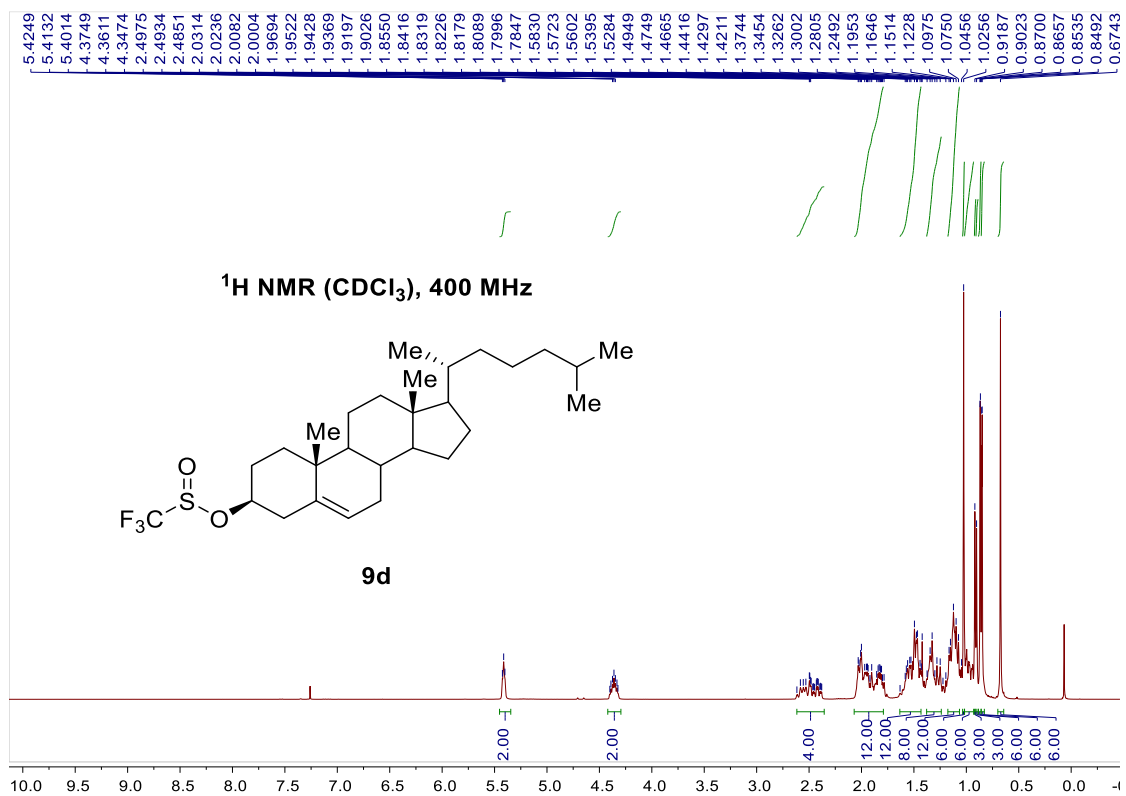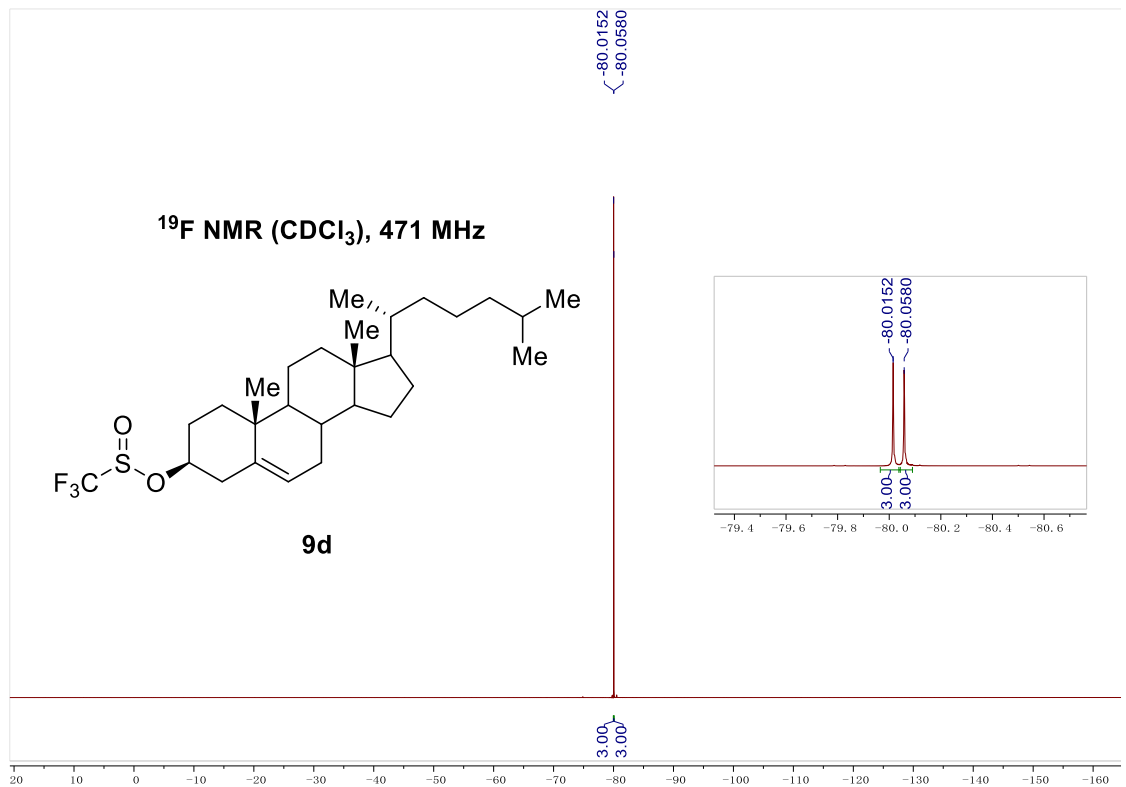

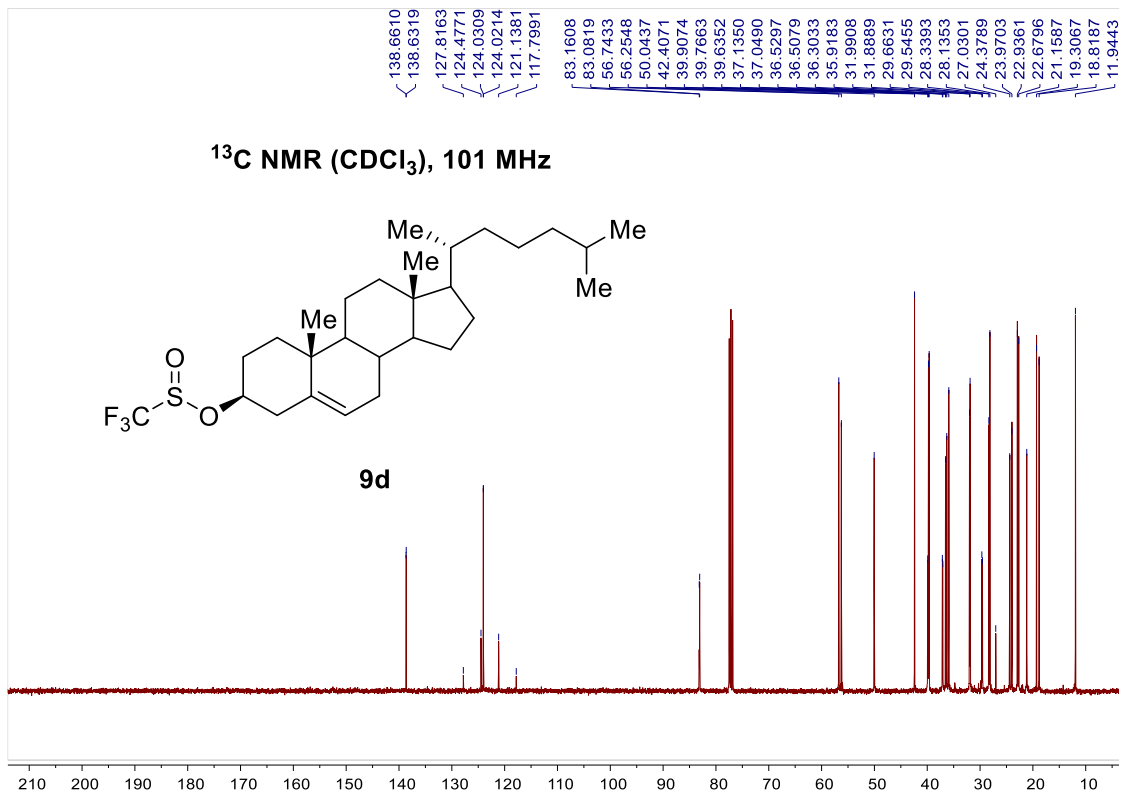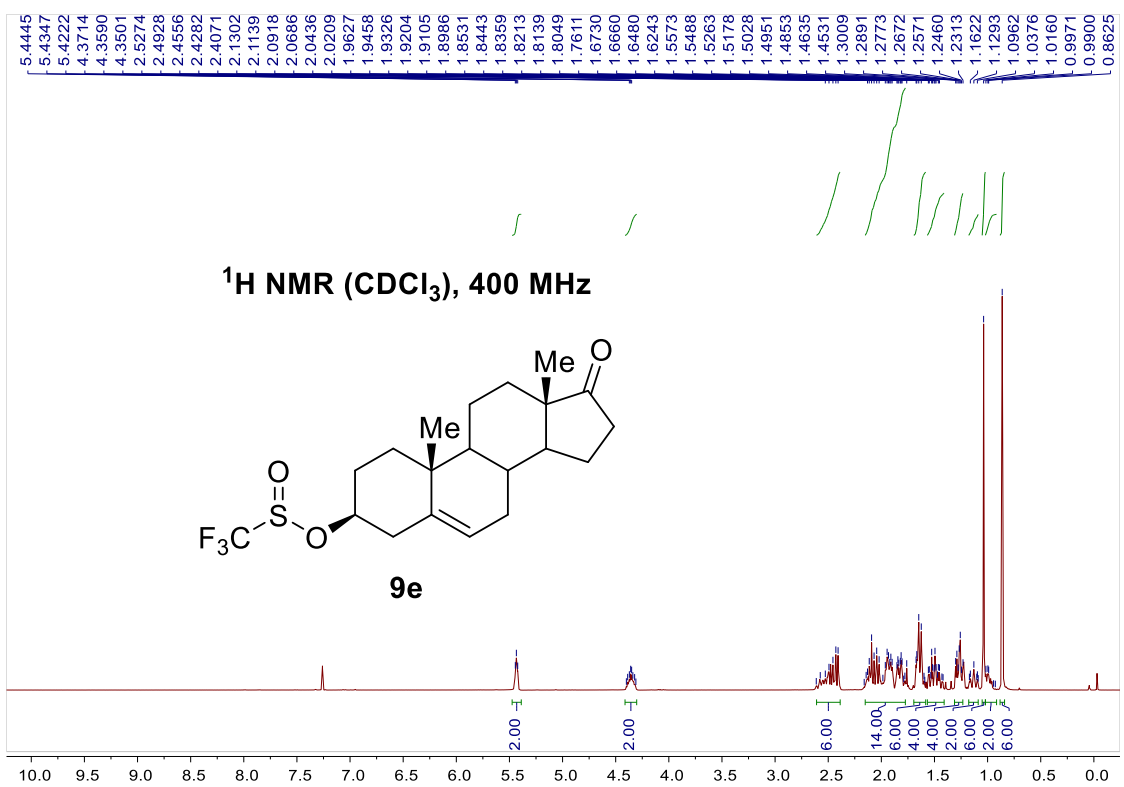

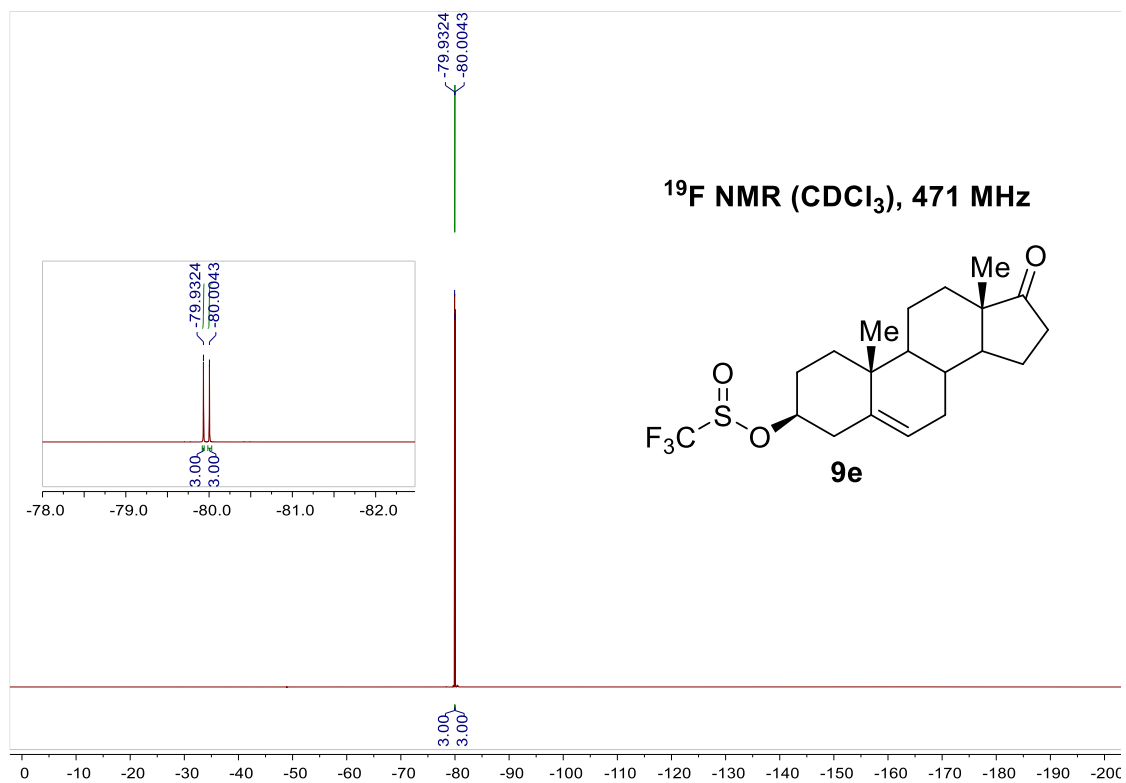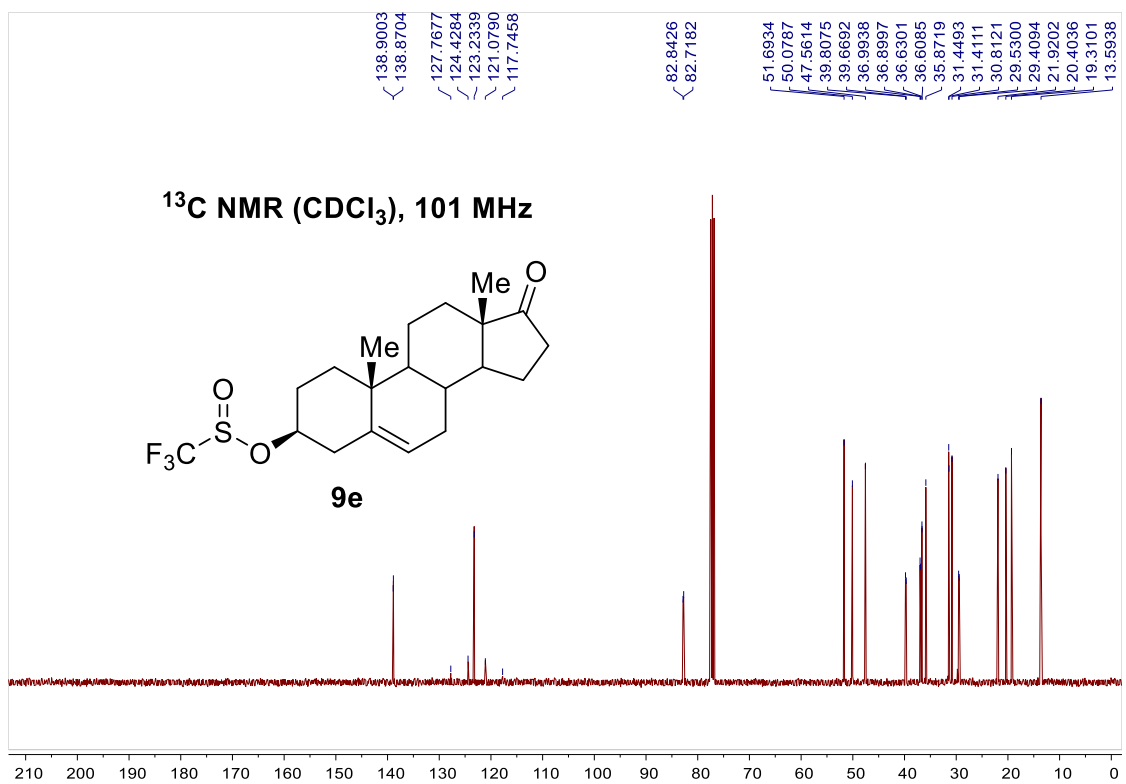

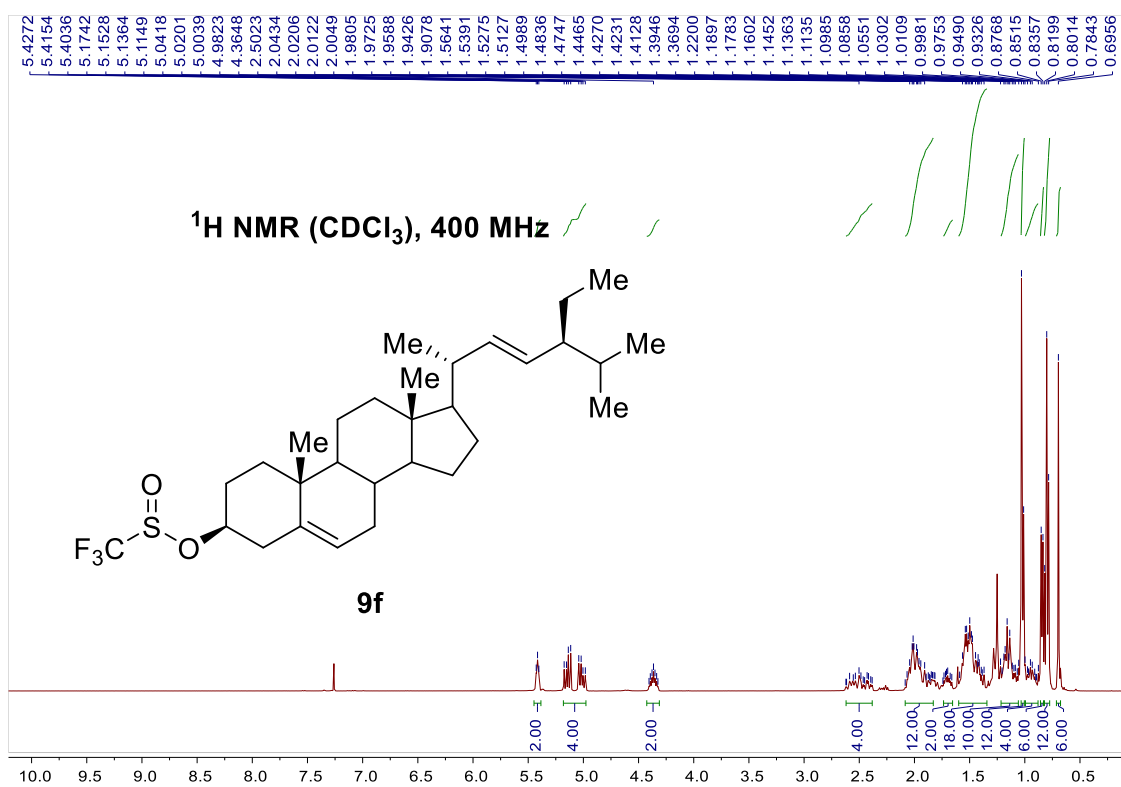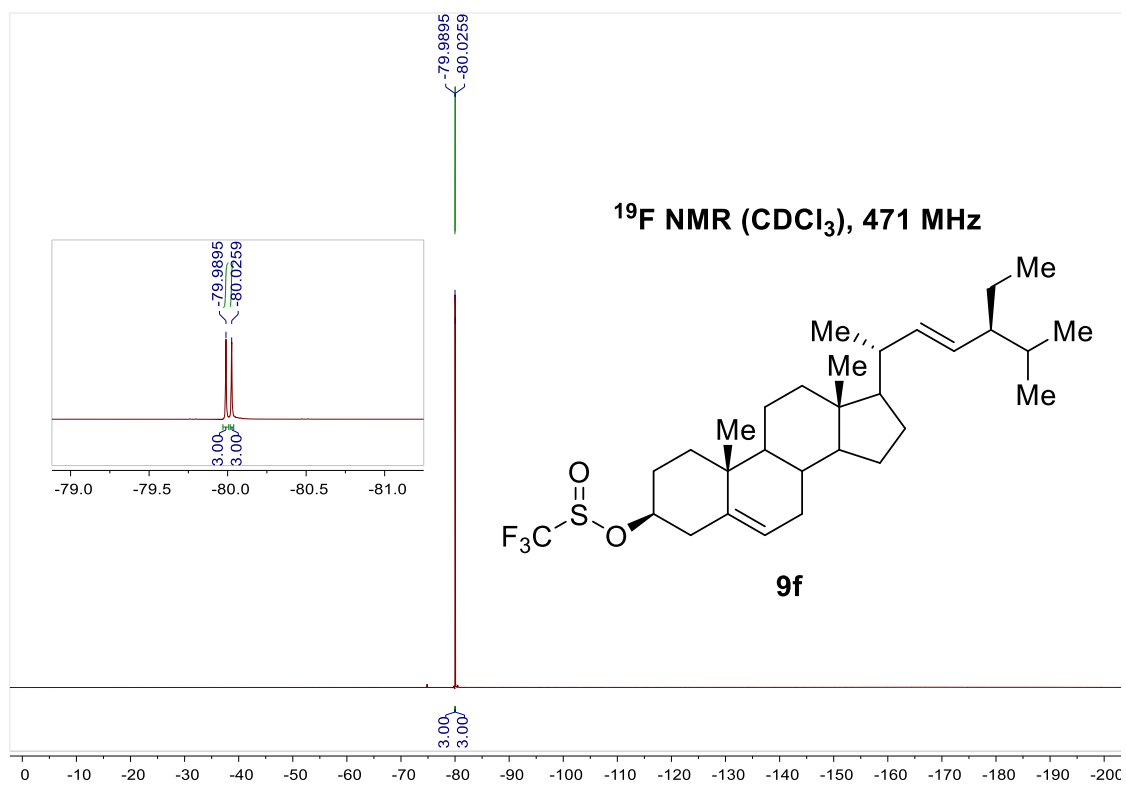

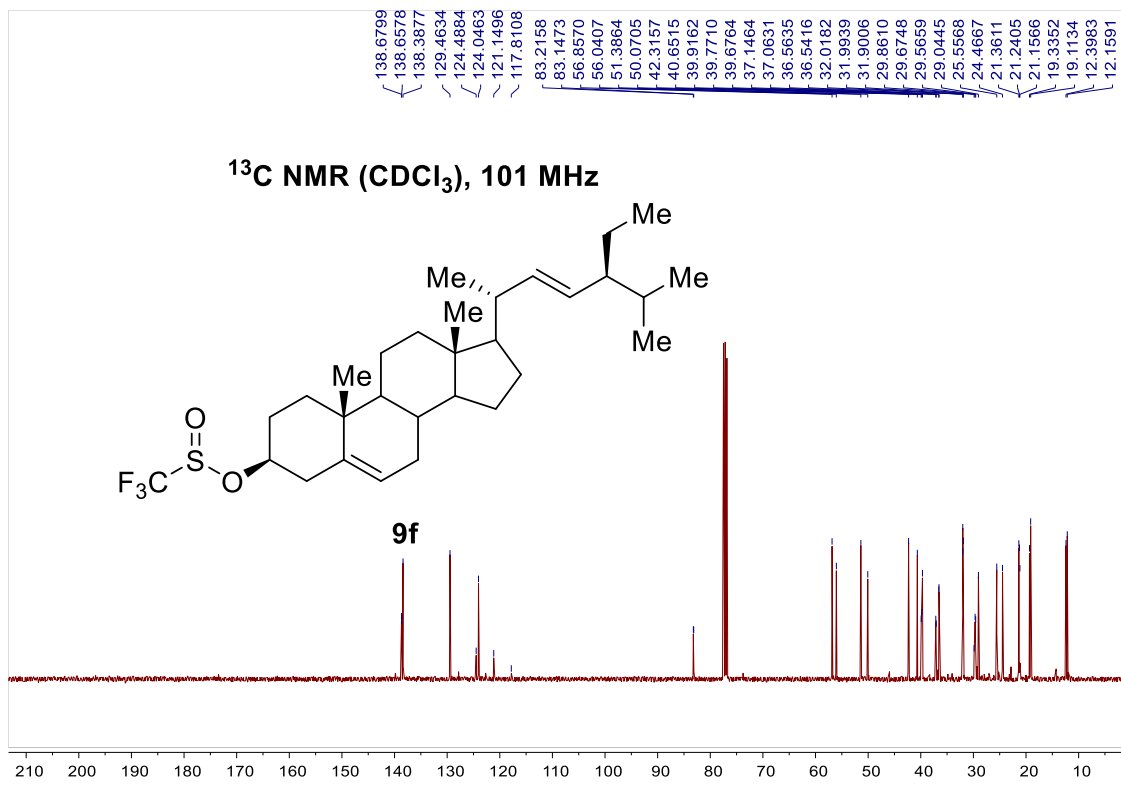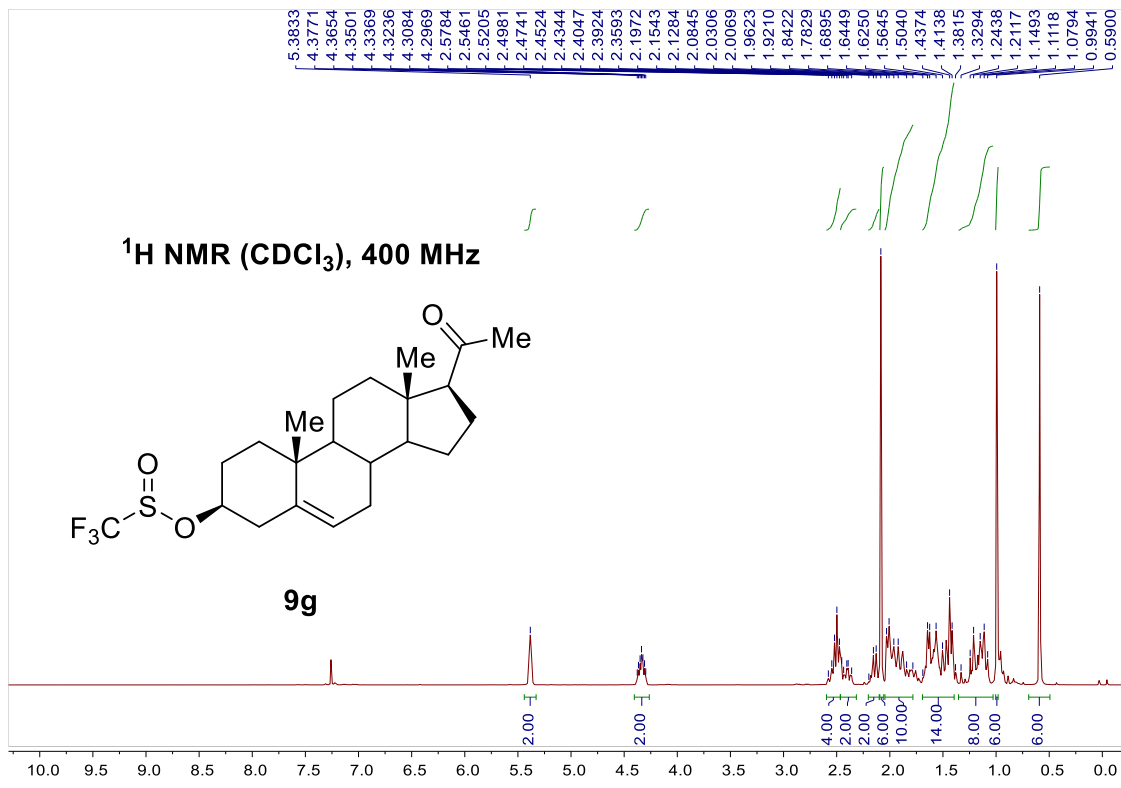



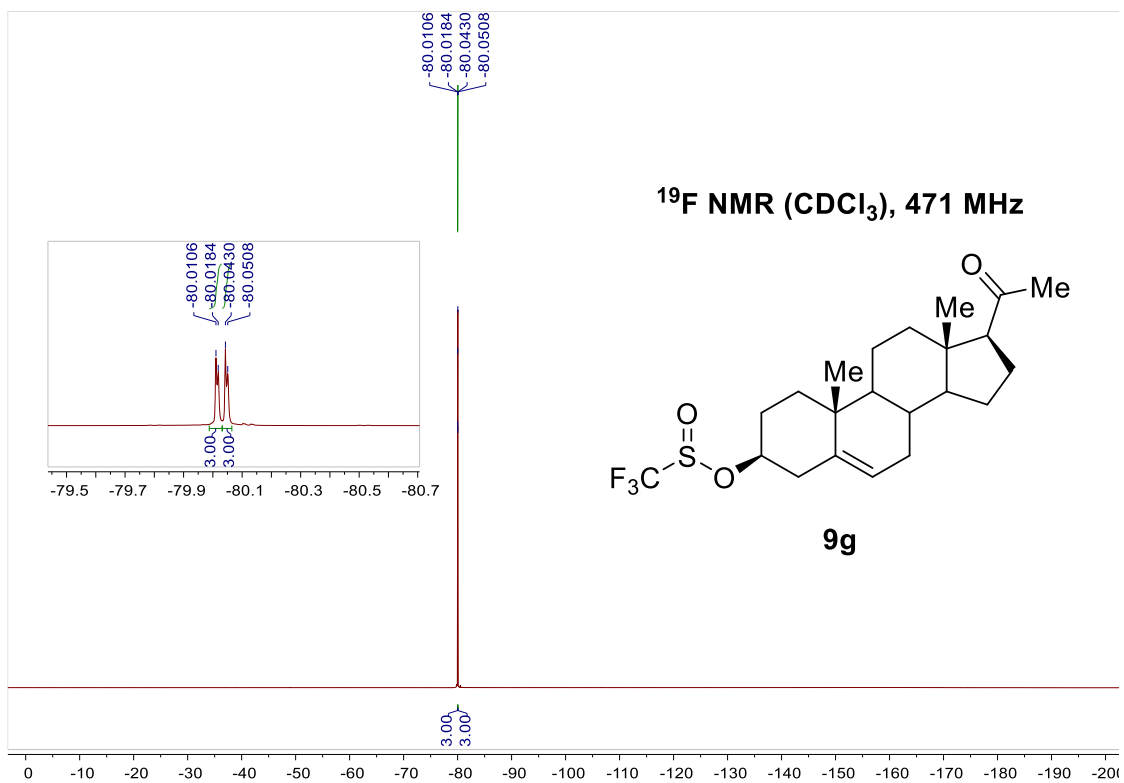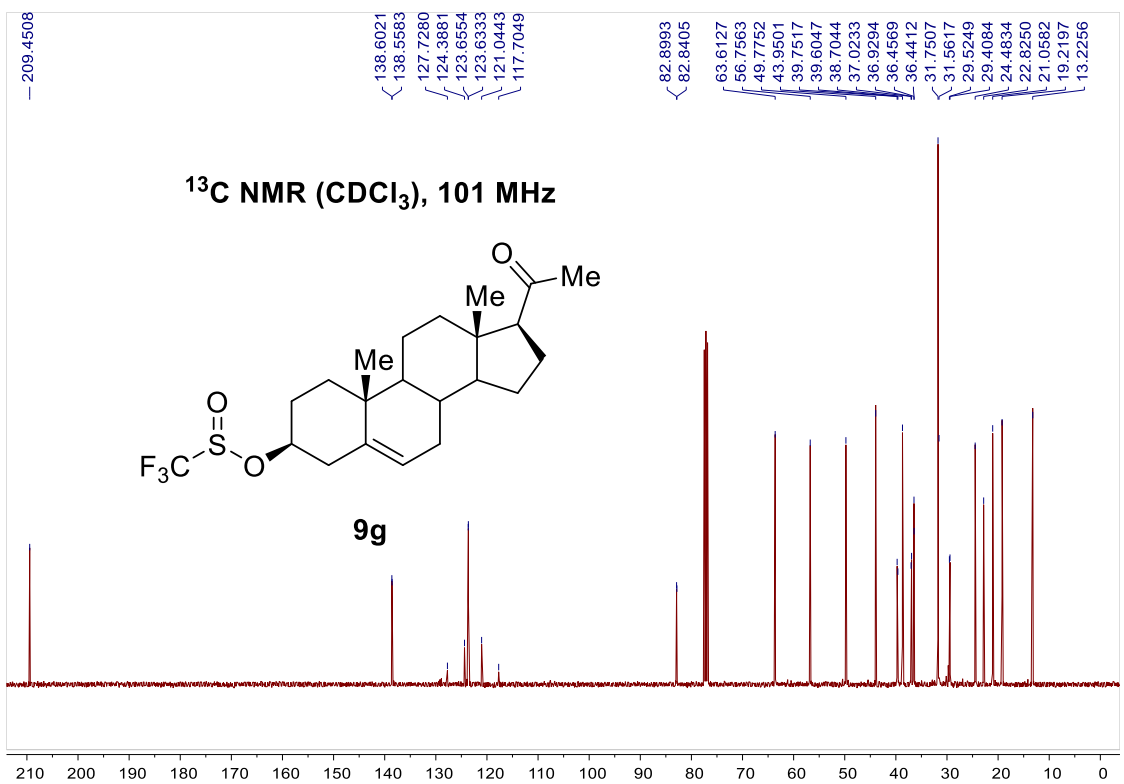

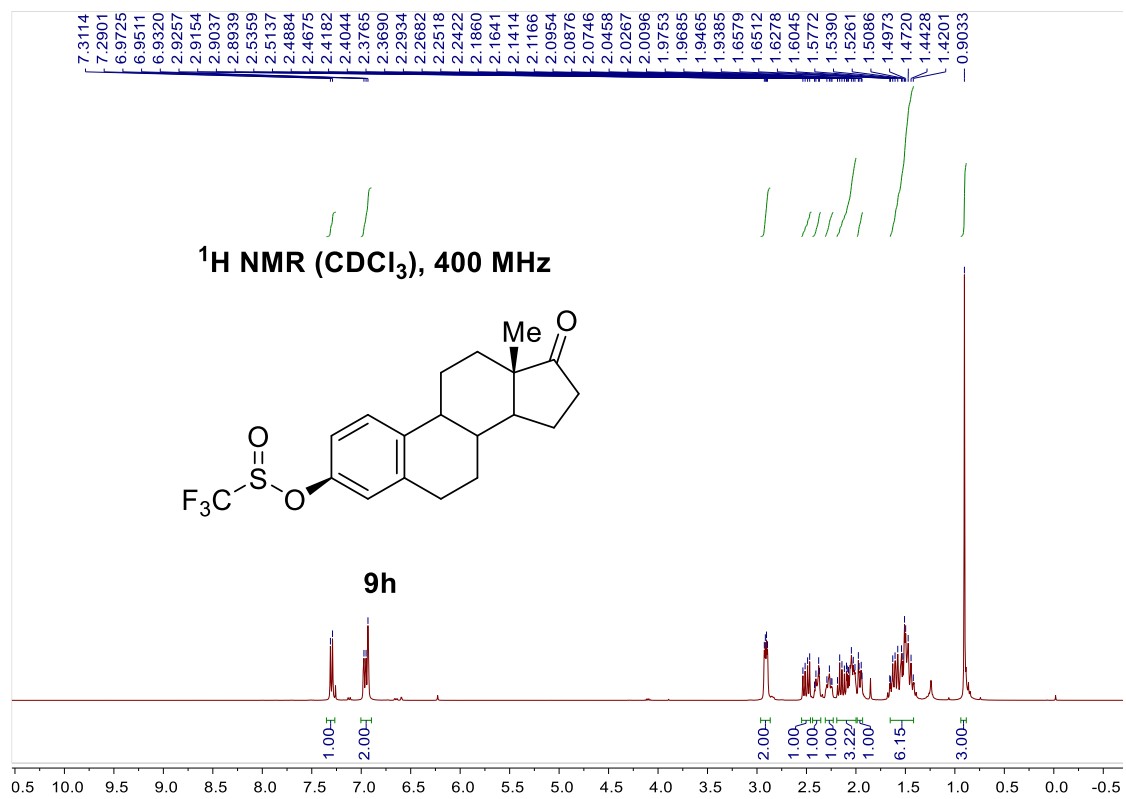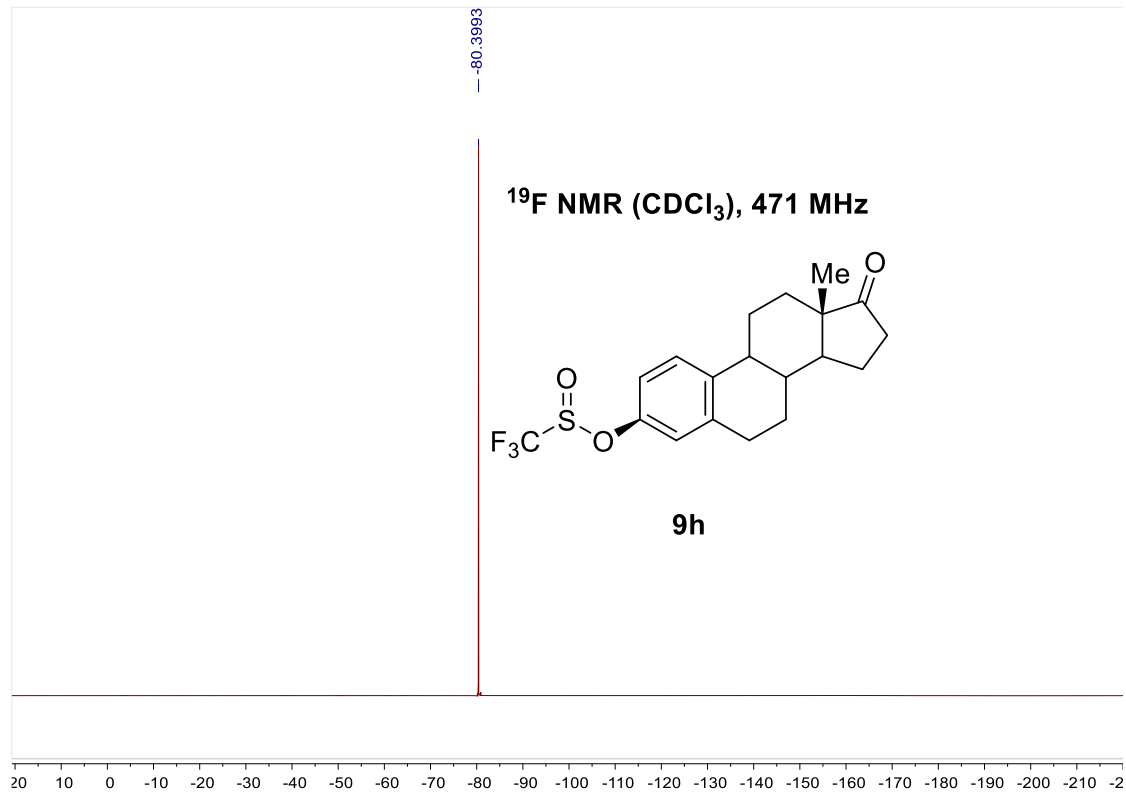

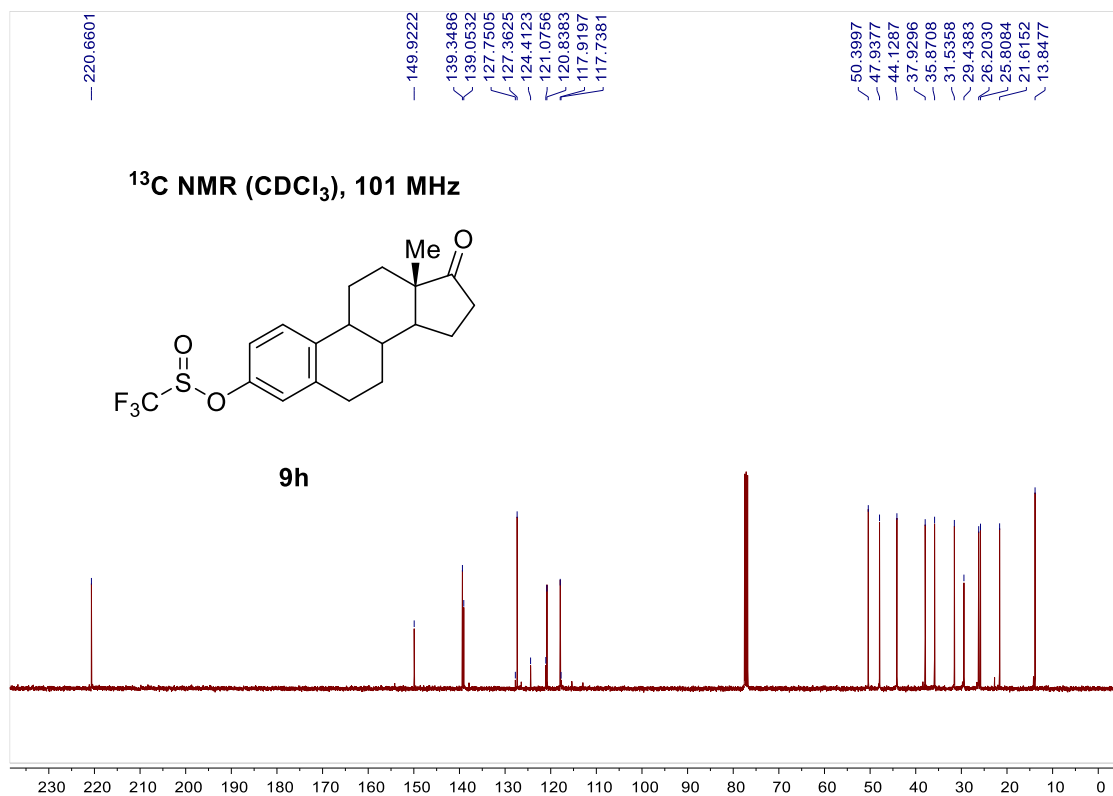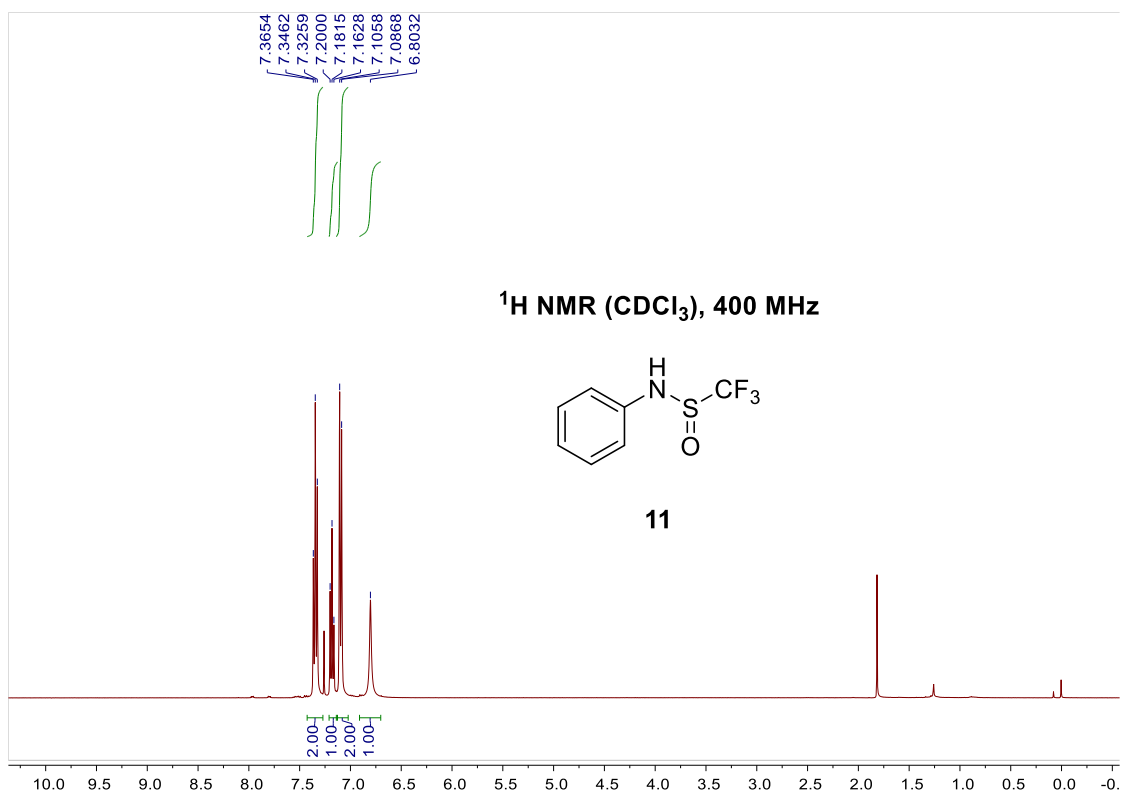

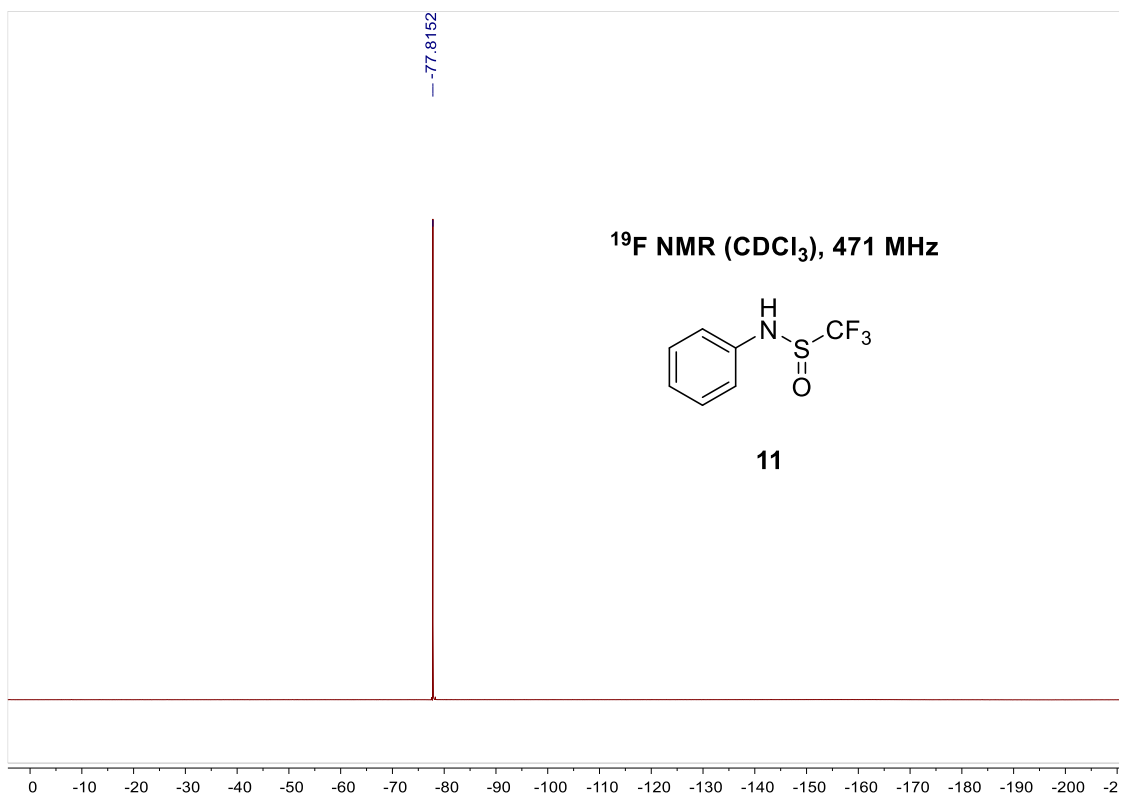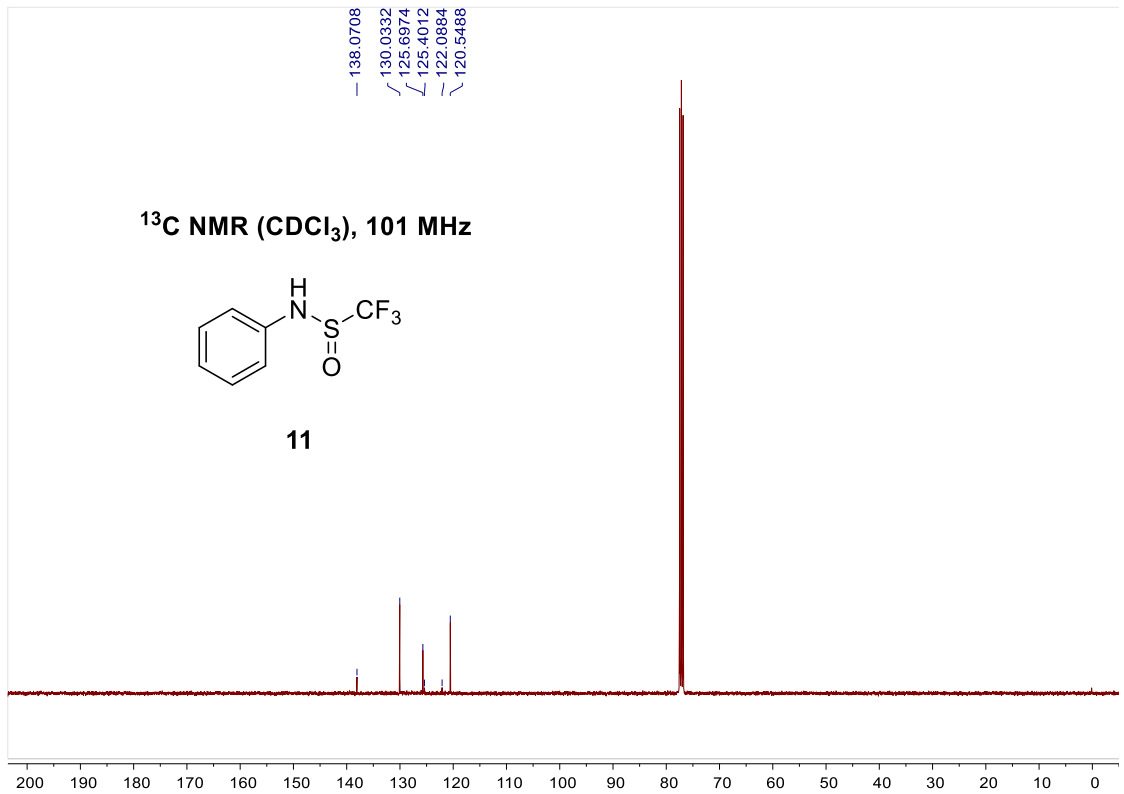

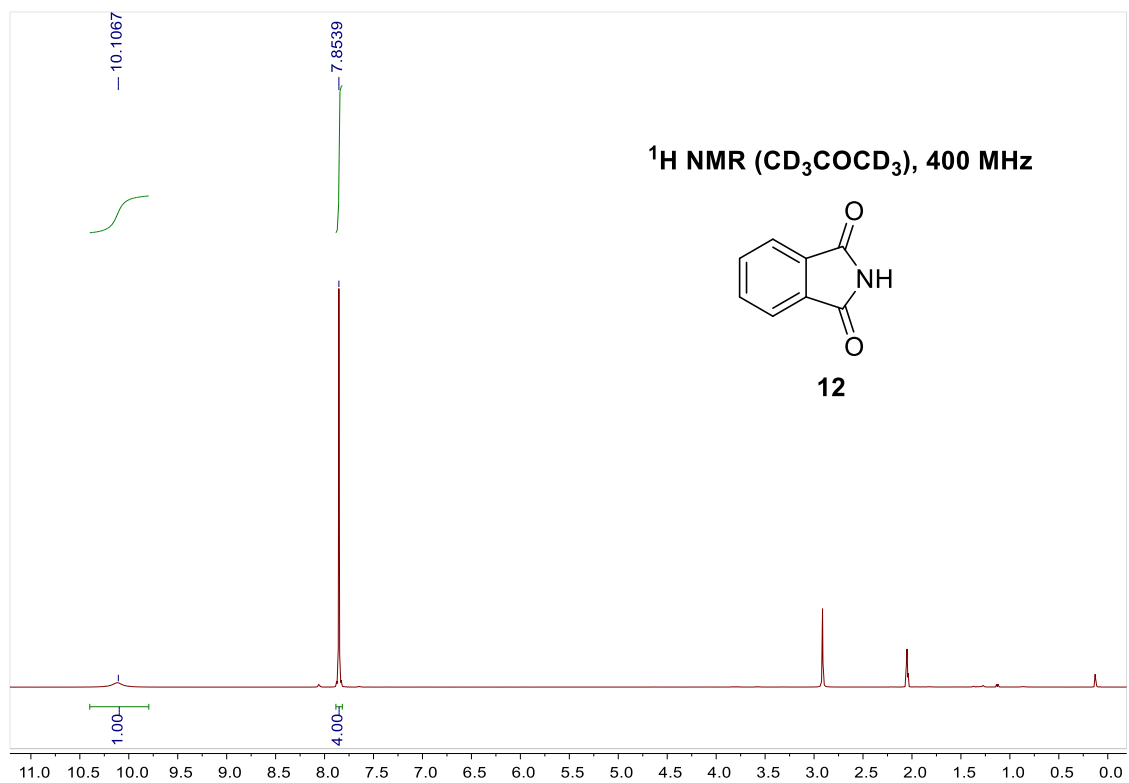

Supplement: d3qo00500c1.pdf [file d3qo00500c1.pdf]
